# Supplementary material for: Innovative paraffin embedding to unlock archival blocks for highly demanding genomic analyses
Source: Research Square preprint supplement (doi:10.21203/rs.3.rs-8787286/v1), 2026-02-13
Supplement: Supplementary file 1 [file 458ad24770ad6613b733357a.xlsx]

## Sheet: Sheet1
Factor	Variable	group1	group2	p_value
Fixative	DIN	GAF	NBF	3.41145e-06
Fixative	DIN_DL	GAF	NBF	0.0207087
Fixative	DeltaDIN	GAF	NBF	8.38054e-05
Fixative	Yield	GAF	NBF	0.951693
Fixative	Size_10kb	GAF	NBF	9.76703e-09
Fixative	Size10kb	GAF	NBF	2.25634e-09
Fixative	MEDIAN_INSERT_SIZE	GAF	NBF	0.00415781
Fixative	MEDIAN_EXON_COVERAGE	GAF	NBF	0.182665
Fixative	USABLE_MSI_SITES	GAF	NBF	0.312116
Fixative	MEDIAN_BIN_COUNT_CNV_TARGET	GAF	NBF	0.486068
Fixative	PCT_CHIMERIC_READS	GAF	NBF	0.980592
Fixative	PCT_TARGET_250X	GAF	NBF	0.0370524
