# Supplementary material for: Innovative paraffin embedding to unlock archival blocks for highly demanding genomic analyses
Source: Research Square preprint supplement (doi:10.21203/rs.3.rs-8787286/v1), 2026-02-13
Supplement: Supplementary file 2 [file 4c9536687d71ffd1a574131b.xlsx]

## Sheet: Foglio1
ID	Fixative	Processing	Fixation_Type	Yield	DIN	DIN_DL	DeltaDIN	Size_10kb	Size10kb	SID	MEDIAN_INSERT_SIZE	MEDIAN_EXON_COVERAGE	USABLE_MSI_SITES	MEDIAN_BIN_COUNT_CNV_TARGET	PCT_CHIMERIC_READS	PCT_TARGET_250X	Subject	Subject_P	Subject_F	TMB	TMB_log	MSI
S1_F	NBF	STD	F	216	3.2	2.7	0.5	83.71	16.61	1	110	165	120	2.1	0.06	42.2	S1	S1STD	S1NBF	1.6	0.20412	2.5
S1_G	GAF	STD	G	352	5.7	2.8	2.9	66.96	47	2	93	617	38	6.9	0.09	66.3	S1	S1STD	S1GAF	4.8	0.681241	2.63
S1_FAO	NBF	AO	FAO	188	4.2	3.2	-1	66.92	41.13	3	113	313	116	3.7	0.04	56.9	S1	S1AO	S1NBF	1.6	0.20412	1.72
S1_GAO	GAF	AO	GAO	372	6.7	2.8	3.9	36.51	71.48	4	125	1277	124	13.1	0.08	96.7	S1	S1AO	S1GAF	2.3	0.361728	1.61
S2_F	NBF	STD	F	1168	4.7	3.3	1.4	95.54	26	5	87	83	25	1.1	2.63	55.2	S2	S2STD	S2NBF	3.7	0.568202	8
S2_G	GAF	STD	G	276	5.5	3.9	1.6	64.16	27.92	6	108	701	125	9.1	0.12	95.6	S2	S2STD	S2GAF	5.5	0.740363	2.54
S2_FAO	NBF	AO	FAO	744	5.6	2.8	2.8	64.51	52.63	7	125	1050	125	11.1	0.11	94.2	S2	S2AO	S2NBF	4.7	0.672098	2.61
S2_GAO	GAF	AO	GAO	9520	7.7	3.4	4.3	18.84	75.11	8	117	509	121	6	0.09	89.1	S2	S2AO	S2GAF	3.9	0.591065	0.79
S3_F	NBF	STD	F	468	2.6	3	-0.4	88.15	12.79	9	123	891	122	9.1	0.12	85.5	S3	S3STD	S3NBF	9.4	0.973128	1.83
S3_G	GAF	STD	G	312	3.6	3.5	0.1	77.33	22.84	10	109	1187	124	15.7	0.22	87.4	S3	S3STD	S3GAF	6.3	0.799341	3.31
S3_FAO	NBF	AO	FAO	704	2.3	3.1	-0.8	66.06	37.64	11	105	410	122	5	0.08	88.2	S3	S3AO	S3NBF	10.9	1.03743	0.82
S3_GAO	GAF	AO	GAO	1896	6.2	1.7	4.5	49.24	71.98	12	113	114	118	1.6	7.79	95.4	S3	S3AO	S3GAF	5.5	0.740363	1.64
S4_F	NBF	STD	F	848	3.2	2.7	0.5	83.1	17.86	13	109	928	126	10.7	0.12	97.2	S4	S4STD	S4NBF	135	2.13033	77.6
S4_G	GAF	STD	G	500	5.6	3.4	3.2	55.11	59.51	14	105	471	124	5.9	0.12	93.4	S4	S4STD	S4GAF	121.8	2.08565	80.65
S4_FAO	NBF	AO	FAO	1080	3.1	2.8	0.3	56.95	53.93	15	105	550	125	7	12.69	91.1	S4	S4AO	S4NBF	131.6	2.11926	77.12
S4_GAO	GAF	AO	GAO	2808	7.5	2.8	4.7	22.35	89.43	16	116	842	126	9.9	0.09	96.5	S4	S4AO	S4GAF	116.4	2.06595	74.4
S5_F	NBF	STD	F	2352	6.2	2.9	3.3	89.67	36.56	17	121	373	125	4.3	0.08	88.5	S5	S5STD	S5NBF	258.4	2.41229	55.56
S5_G	GAF	STD	G	392	6.3	4.7	1.6	60.43	52.23	18	107	877	120	10	0.56	93.4	S5	S5STD	S5GAF	87.5	1.94201	59.17
S5_FAO	NBF	AO	FAO	261.6	5.7	4.4	1.3	72.71	25.17	19	110	335	118	4	0.05	78.2	S5	S5AO	S5NBF	82.8	1.91803	54.03
S5_GAO	GAF	AO	GAO	1720	6.2	2.5	3.7	42.81	60.44	20	118	581	118	6.6	0.17	92.3	S5	S5AO	S5GAF	82.9	1.91855	50.43
S6_F	NBF	STD	F	164	3.8	3.3	0.5	72.01	23.32	21	117	310	108	3.5	0.1	66.3	S6	S6STD	S6NBF	11.7	1.06819	1.82
S6_G	GAF	STD	G	144	4.1	6	-1.9	79.02	28.06	22	100	779	118	9.1	0.07	93.3	S6	S6STD	S6GAF	9.4	0.973128	4.13
S6_FAO	NBF	AO	FAO	183.2	6.2	3	-3.2	74.61	35.21	23	107	76	29	5.9	0.23	88	S6	S6AO	S6NBF	12.5	1.09691	3.51
S6_GAO	GAF	AO	GAO	267.2	7.6	1.9	5.7	32.22	73.97	24	119	716	119	0.9	0.07	91.9	S6	S6AO	S6GAF	12.5	1.09691	6.9
S7_F	NBF	STD	F	85.6	2.4	2.1	0.3	86.53	29.4	25	111	690	120	7.6	0.32	92.3	S7	S7STD	S7NBF	0.8	-0.09691	0
S7_G	GAF	STD	G	236	6.5	4.9	1.6	61	56.46	26	114	1133	122	11.5	0.41	92.6	S7	S7STD	S7GAF	4.7	0.672098	0
S7_FAO	NBF	AO	FAO	309.6	6.1	6.2	-0.1	65.24	48.5	27	112	333	114	3.9	0.05	73.1	S7	S7AO	S7NBF	0.8	-0.09691	0.93
S7_GAO	GAF	AO	GAO	392	7.3	6.2	1.1	30.78	75.19	28	111	692	121	7.7	0.12	93.9	S7	S7AO	S7GAF	1.6	0.20412	0
S8_F	NBF	STD	F	139.2	5.4	6	-0.6	74.22	38.92	29	112	1223	122	12.4	0.11	91.1	S8	S8STD	S8NBF	3.9	0.591065	3.2
S8_G	GAF	STD	G	332.8	6.2	5.9	1.3	55.72	74.07	30	121	910	122	11.3	0.16	86.2	S8	S8STD	S8GAF	3.7	0.568202	0
S8_FAO	NBF	AO	FAO	504	6.8	5.4	1.4	63.91	37.01	31	113	1310	124	13.9	0.08	96.3	S8	S8AO	S8NBF	3.8	0.579784	0
S8_GAO	GAF	AO	GAO	1992	7.8	3.5	4.3	19.72	86.14	32	122	1334	124	0.4	0.13	90	S8	S8AO	S8GAF	4.3	0.633468	0
S9_F	NBF	STD	F	528	5.6	5.1	0.5	74.68	31.64	33	96	1019	109	11.7	0.11	91.2	S9	S9STD	S9NBF	0.8	-0.09691	0
S9_G	GAF	STD	G	392	6.1	5.7	0.4	62.65	52.15	34	102	894	115	11.2	0.66	94.2	S9	S9STD	S9GAF	0.8	-0.09691	0.8
S9_FAO	NBF	AO	FAO	516	5.4	2.9	-2.5	73.96	41	35	102	757	123	8.7	0.06	94.4	S9	S9AO	S9NBF	0.8	-0.09691	0
S9_GAO	GAF	AO	GAO	496	7.2	4.9	2.3	29.52	75.35	36	117	697	121	7.5	0.3	94.6	S9	S9AO	S9GAF	0.8	-0.09691	0
S10_F	NBF	STD	F	3628	4.4	3.2	1.2	85.51	17.26	37	105	201	118	2.5	0.07	51	S10	S10STD	S10NBF	0.8	-0.09691	4.24
S10_G	GAF	STD	G	204	6.4	3.4	4	34.05	82.14	38	127	1148	126	11.9	0.09	87.8	S10	S10STD	S10GAF	0.8	-0.09691	2.38
S10_FAO	NBF	AO	FAO	1548	5.9	5.9	0	65.78	49.53	39	121	287	124	3.3	0.1	66.9	S10	S10AO	S10NBF	0.8	-0.09691	3.23
S10_GAO	GAF	AO	GAO	652	8.3	6.1	2.2	33.86	75.42	40	121	741	126	5	0.14	91.9	S10	S10AO	S10GAF	0.8	-0.09691	2.38
S11_F	NBF	STD	F	52	5.6	3.8	1.8	71.2	40	41	109	693	125	7.6	3.25	91.8	S11	S11STD	S11NBF	7	0.845098	4.8
S11_G	GAF	STD	G	224	5.3	5.6	-0.3	64.22	49.92	42	109	353	125	4.2	10.58	74.8	S11	S11STD	S11GAF	0	0	0
S11_FAO	NBF	AO	FAO	140	5.2	5.3	-0.1	70.15	41.46	43	104	749	125	8.3	3.93	93.7	S11	S11AO	S11NBF	7.8	0.892095	5.6
S11_GAO	GAF	AO	GAO	192	6.9	3.5	3.4	39.77	71.21	44	124	342	123	4.5	11.77	86.4	S11	S11AO	S11GAF	9.4	0.973128	4.88
S12_F	NBF	STD	F	4200	2.9	3.6	-0.7	88.71	19.47	45	102	105	109	1.4	0.1	0.3	S12	S12STD	S12NBF	0.8	-0.09691	3.67
S12_G	GAF	STD	G	1520	6.5	3.5	3	72.18	49.02	46	121	1098	126	11.6	0.12	87.4	S12	S12STD	S12GAF	2.3	0.361728	1.59
S12_FAO	NBF	AO	FAO	7440	6	3.5	2.5	61.45	41.01	47	109	862	126	10	0.21	92	S12	S12AO	S12NBF	1.6	0.20412	0.79
S12_GAO	GAF	AO	GAO	1492	6.2	3.7	2.5	55.98	61.99	48	121	1326	126	13.6	0.16	97.3	S12	S12AO	S12GAF	2.3	0.361728	2.38
S13_F	NBF	STD	F	448	2.5	3.9	-1.4	92.11	16.04	49	114	1288	126	14	0.18	97.4	S13	S13STD	S13NBF	14.1	1.14922	8.73
S13_G	GAF	STD	G	636	5.8	3.1	2.7	61.18	49.69	50	116	640	126	9.4	0.11	93.8	S13	S13STD	S13GAF	14.1	1.14922	7.14
S13_FAO	NBF	AO	FAO	1028	4.2	2	-2.2	62.83	24.94	51	120	590	126	6.5	0.22	95.9	S13	S13AO	S13NBF	10.9	1.03743	6.35
S13_GAO	GAF	AO	GAO	1316	6.1	4.1	2	53.89	58.54	52	119	1182	125	12.8	0.12	97	S13	S13AO	S13GAF	19.5	1.29003	9.6
S14_F	NBF	STD	F	152	2.2	4.4	-2.2	83.09	21.82	53	112	205	121	2.5	0.09	20.5	S14	S14STD	S14NBF	8.6	0.934498	1.65
S14_G	GAF	STD	G	180	5.7	3.4	3.3	64.85	55	54	125	355	124	4	0.11	83.6	S14	S14STD	S14GAF	7.8	0.892095	1.61
S14_FAO	NBF	AO	FAO	128	5.7	2.7	-3	64.8	41.21	55	116	212	123	2.6	0.08	16.1	S14	S14AO	S14NBF	7.1	0.851258	2.44
S14_GAO	GAF	AO	GAO	248	8.2	6.7	1.5	55.43	54.58	56	122	733	124	1.5	0.07	92.2	S14	S14AO	S14GAF	9.5	0.977724	3.03
S15_F	NBF	STD	F	192	3.7	3.6	0.1	83.09	28.61	57	101	410	108	5.2	0.11	85.5	S15	S15STD	S15NBF	7.8	0.892095	1.85
S15_G	GAF	STD	G	344	5.2	6.5	0.7	55.22	73.35	58	115	1112	126	16.6	0.15	92.9	S15	S15STD	S15GAF	10.1	1.00432	1.59
S15_FAO	NBF	AO	FAO	96	5.8	4.5	-1.3	69.7	31.48	59	122	343	125	4	0.07	83.3	S15	S15AO	S15NBF	8.6	0.934498	0.8
S15_GAO	GAF	AO	GAO	164	7.9	6.7	1.2	32.23	71.36	60	120	952	126	10.2	0.09	97.1	S15	S15AO	S15GAF	10.9	1.03743	0.79
S16_F	NBF	STD	F	1168	6	3.5	2.5	94.65	25.18	61	98	580	125	7.1	2.98	90.5	S16	S16STD	S16NBF	70.3	1.84696	70.4
S16_G	GAF	STD	G	204	5.5	6.3	0.2	58.71	58.68	62	116	285	123	3	1.48	52.3	S16	S16STD	S16GAF	68	1.83251	72.36
S16_FAO	NBF	AO	FAO	116	5.8	5.1	0.7	66.36	41.91	63	110	2104	125	23.7	7.28	93.7	S16	S16AO	S16NBF	68.7	1.83696	48.8
S16_GAO	GAF	AO	GAO	208	6.8	6.8	0	39.69	61.44	64	124	268	120	3	0.06	88.2	S16	S16AO	S16GAF	66.5	1.82282	70.19
