# Supplementary material for: Innovative paraffin embedding to unlock archival blocks for highly demanding genomic analyses
Source: Research Square preprint supplement (doi:10.21203/rs.3.rs-8787286/v1), 2026-02-13
Supplement: Supplementary file 3 [file 5854d5ccc2f5d50a5cf7e6c0.xlsx]

## Sheet: Sheet1
Factor	Variable	group1	group2	p_value
Processing	DIN	AO	STD	2.30111e-05
Processing	DIN_DL	AO	STD	0.971018
Processing	DeltaDIN	AO	STD	0.33815
Processing	Yield	AO	STD	0.111065
Processing	Size_10kb	AO	STD	2.95027e-09
Processing	Size10kb	AO	STD	6.08557e-05
Processing	MEDIAN_INSERT_SIZE	AO	STD	0.0070446
Processing	MEDIAN_EXON_COVERAGE	AO	STD	0.778343
Processing	USABLE_MSI_SITES	AO	STD	0.378884
Processing	MEDIAN_BIN_COUNT_CNV_TARGET	AO	STD	0.428347
Processing	PCT_CHIMERIC_READS	AO	STD	0.175328
Processing	PCT_TARGET_250X	AO	STD	0.0303234
