# Supplementary material for: Innovative paraffin embedding to unlock archival blocks for highly demanding genomic analyses
Source: Research Square preprint supplement (doi:10.21203/rs.3.rs-8787286/v1), 2026-02-13
Supplement: Supplementary file 4 [file 6f624dc73e2e1ef8d0415624.xlsx]

## Sheet: Foglio1
Sample	Fixation_Type	BAIT_SET	BAIT_TERRITORY	BAIT_DESIGN_EFFICIENCY	ON_BAIT_BASES	NEAR_BAIT_BASES	OFF_BAIT_BASES	PCT_SELECTED_BASES	PCT_OFF_BAIT	ON_BAIT_VS_SELECTED	MEAN_BAIT_COVERAGE	PCT_USABLE_BASES_ON_BAIT	PCT_USABLE_BASES_ON_TARGET	FOLD_ENRICHMENT	HS_LIBRARY_SIZE	HS_PENALTY_10X	HS_PENALTY_20X	HS_PENALTY_30X	HS_PENALTY_40X	HS_PENALTY_50X	HS_PENALTY_100X	TARGET_TERRITORY	GENOME_SIZE	TOTAL_READS	PF_READS	PF_BASES	PF_UNIQUE_READS	PF_UQ_READS_ALIGNED	PF_BASES_ALIGNED	PF_UQ_BASES_ALIGNED	ON_TARGET_BASES	PCT_PF_READS	PCT_PF_UQ_READS	PCT_PF_UQ_READS_ALIGNED	MEAN_TARGET_COVERAGE	MEDIAN_TARGET_COVERAGE	MAX_TARGET_COVERAGE	MIN_TARGET_COVERAGE	ZERO_CVG_TARGETS_PCT	PCT_EXC_DUPE	PCT_EXC_ADAPTER	PCT_EXC_MAPQ	PCT_EXC_BASEQ	PCT_EXC_OVERLAP	PCT_EXC_OFF_TARGET	FOLD_80_BASE_PENALTY	PCT_TARGET_BASES_1X	PCT_TARGET_BASES_2X	PCT_TARGET_BASES_10X
S1_F_metrics.txt	F	S34226467_Covered	49995737	0.823854	11435050554	2327594111	4074518604	0.771571	0.228429	0.830876	228.721	0.579978	0.181257	40.2269	66265209	8.11074	8.90192	9.93544	11.4038	13.7645	-1	41189192	3137161264	152849707	152849707	19716336539	103918477	103634288	17837163269	12029039916	3573720578	1	0.679874	0.997265	86.7636	44	5343	0	0.02155	0.325619	1e-06	0.066627	0.005292	0.238387	0.163773	2.22471	0.970119	0.966617	0.947469
S1_G_AO_metrics.txt	GAO	S34226467_Covered	49995737	0.823854	16435618309	2948240024	5013535433	0.794505	0.205495	0.847902	328.74	0.608628	0.180083	42.2714	81433740	21.7928	27.9182	46.5412	-1	-1	-1	41189192	3137161264	205362126	205362126	27004367857	134356657	133758497	24397393766	15865084161	4863033767	1	0.654243	0.995548	118.066	69	7341	0	0.021925	0.349722	0	0.073487	0.004211	0.231273	0.142031	5.62218	0.969136	0.964864	0.925375
S10_F_metrics.txt	F	S34226467_Covered	49995737	0.823854	11147563217	2184382594	5416238127	0.711106	0.288894	0.836154	222.97	0.541431	0.166281	37.3099	57647116	23.803	36.3875	-1	-1	-1	-1	41189192	3137161264	159822505	159822505	20589065205	106530229	106118199	18748183938	12401343438	3423577940	1	0.666553	0.996132	83.1184	29	9773	0	0.021041	0.338531	1e-06	0.090518	0.005801	0.217116	0.16548	5.1949	0.970756	0.967456	0.914392
S10_G_AO_metrics.txt	GAO	S34226467_Covered	49995737	0.823854	16017073159	3521201367	5131582484	0.79199	0.20801	0.819779	320.369	0.598691	0.181751	40.7399	82426293	6.15227	6.47881	6.85978	7.29518	7.8414	15.726	41189192	3137161264	199919818	199919818	26753500032	132128002	131713349	24669857010	16195136020	4862464406	1	0.660905	0.996862	118.052	107	6042	0	0.020217	0.343525	1e-06	0.054488	0.004465	0.238017	0.162449	1.76197	0.971753	0.969157	0.954483
S11_F_metrics.txt	F	S34226467_Covered	49995737	0.823854	19211190091	3896796632	5785796657	0.799756	0.200244	0.831366	384.257	0.613617	0.180121	41.7209	97089829	6.64037	6.96978	7.36853	7.8193	8.36716	15.6627	41189192	3137161264	245221033	245221033	31308119128	158637572	158275902	28893783380	18531671806	5639264503	1	0.646917	0.99772	136.911	118	3920	0	0.020152	0.358628	1e-06	0.057792	0.004145	0.236448	0.147863	1.92833	0.971785	0.968921	0.953276
S11_G_AO_metrics.txt	GAO	S34226467_Covered	49995737	0.823854	16137931988	3993314722	3902109461	0.837638	0.162362	0.801636	322.786	0.632557	0.207325	42.1345	96300086	5.59401	5.83777	6.11259	6.41848	6.77981	10.1866	41189192	3137161264	195338533	195338533	25512229303	134090374	133677114	24033356171	16391010967	5289332747	1	0.686451	0.996918	128.416	122	2621	0	0.019199	0.317989	1e-06	0.040593	0.005225	0.24114	0.175012	1.73534	0.973002	0.97049	0.956254
S12_F_metrics.txt	F	S34226467_Covered	49995737	0.823854	12281127700	2820360813	4407753160	0.774068	0.225932	0.81324	245.643	0.582561	0.191448	39.5004	74289144	7.24718	7.76266	8.39139	9.18023	10.2253	-1	41189192	3137161264	160379745	160379745	21081280883	111532560	111277161	19509241673	13474771247	4035978080	1	0.695428	0.99771	97.9863	43	2958	0	0.020638	0.309313	1e-06	0.063491	0.005486	0.234518	0.180368	2.04138	0.971903	0.969622	0.955537
S12_G_AO_metrics.txt	GAO	S34226467_Covered	49995737	0.823854	15451166335	3027401152	5852500221	0.759464	0.240536	0.836167	309.05	0.584654	0.182517	39.8478	79470974	18.8111	22.8492	31.2025	-1	-1	-1	41189192	3137161264	203918717	203918717	26427883404	135704871	135247230	24331067708	16092406021	4823527733	1	0.665485	0.996628	117.107	81	4725	0	0.021721	0.338607	1e-06	0.074925	0.005189	0.222615	0.160472	4.87944	0.970725	0.967985	0.943712
S13_F_metrics.txt	F	S34226467_Covered	49995737	0.823854	16721606702	4011961356	3563995783	0.853319	0.146681	0.806499	334.461	0.640161	0.208514	43.1836	94021322	17.3932	20.3706	25.4108	38.6437	-1	-1	41189192	3137161264	194795332	194795332	26120922646	133180454	132825470	24297563841	16450911320	5446574843	1	0.683694	0.997335	132.233	49	4934	0	0.02086	0.32294	0	0.048816	0.005336	0.232424	0.166368	5.08589	0.971521	0.968479	0.945723
S13_G_AO_metrics.txt	GAO	S34226467_Covered	49995737	0.823854	21922029654	4694060124	6968295178	0.792514	0.207486	0.823638	438.478	0.599038	0.17296	40.9588	98977775	6.29357	6.58644	6.91298	7.28327	7.72359	12.2964	41189192	3137161264	280771104	280771104	36595365331	174674022	174235784	33584384956	20642419135	6329518815	1	0.622123	0.997491	153.669	138	4359	0	0.020421	0.385357	1e-06	0.052794	0.00434	0.217831	0.151256	1.85144	0.972127	0.970037	0.959155
S14_F_metrics.txt	F	S34226467_Covered	49995737	0.823854	14815601973	2928557717	9188513741	0.658834	0.341166	0.834957	296.337	0.469946	0.134562	34.5178	70258067	11.4203	12.7501	14.6216	17.6424	23.8678	-1	41189192	3137161264	244157423	244157423	31526149528	153581592	153061472	26932673431	16716371567	4242224393	1	0.629027	0.996613	102.994	72	6323	0	0.021244	0.379327	1e-06	0.084841	0.00452	0.203874	0.169979	2.64086	0.970799	0.968318	0.952048
S14_G_AO_metrics.txt	GAO	S34226467_Covered	49995737	0.823854	22079798823	5767685234	5032112897	0.846953	0.153047	0.792883	441.634	0.635011	0.213753	42.1379	130261404	5.9007	6.09658	6.30552	6.53731	6.80175	8.69787	41189192	3137161264	260326477	260326477	34770721451	178324428	177954073	32879596954	22392569713	7432334755	1	0.685003	0.997923	180.444	166	6345	0	0.019495	0.318952	0	0.037193	0.006215	0.232884	0.178749	1.89941	0.973253	0.971265	0.960574
S15_F_metrics.txt	F	S34226467_Covered	49995737	0.823854	15512711456	3802941087	3879583330	0.832742	0.167258	0.803116	310.281	0.628598	0.207479	41.9655	92647023	5.9744	6.26517	6.60209	6.98516	7.44762	12.8088	41189192	3137161264	191370836	191370836	24678258832	130915823	130635368	23195235873	15763779637	5120224955	1	0.684095	0.997858	124.31	115	2843	0	0.020444	0.320387	2e-06	0.041973	0.005406	0.236256	0.175276	1.85537	0.971927	0.969655	0.956288
S15_G_AO_metrics.txt	GAO	S34226467_Covered	49995737	0.823854	21665250307	4714686397	5554143042	0.826075	0.173925	0.821278	433.342	0.631329	0.195643	42.5709	116984944	7.52549	7.88931	8.31695	8.78927	9.37903	16.1958	41189192	3137161264	267188373	267188373	34316868828	177450644	176711238	31934079746	21035263543	6713858042	1	0.664141	0.995833	163	124	4773	0	0.020569	0.341291	1e-06	0.048467	0.004949	0.237177	0.157923	2.29578	0.971905	0.969892	0.958361
S16_F_metrics.txt	F	S34226467_Covered	49995737	0.823854	19614968780	4040774798	4912321731	0.828048	0.171952	0.829184	392.333	0.638836	0.194645	43.0835	106413069	6.55998	6.86813	7.22193	7.62138	8.10073	13.2228	41189192	3137161264	239056179	239056179	30704224688	159272682	158722127	28568065309	18903511158	5976425861	1	0.666256	0.996543	145.097	124	3927	0	0.020078	0.338299	0	0.048632	0.004118	0.248625	0.151174	1.98763	0.97201	0.969375	0.953902
S16_G_AO_metrics.txt	GAO	S34226467_Covered	49995737	0.823854	20198889359	5397370937	4733309677	0.843937	0.156063	0.789134	404.012	0.630492	0.221311	41.7893	133692082	5.57756	5.74016	5.92684	6.11955	6.33634	7.8828	41189192	3137161264	240144309	240144309	32036697678	170777589	170509382	30329569973	21447169358	7090082080	1	0.711146	0.998429	172.135	162	5177	0	0.018649	0.292863	1e-06	0.039188	0.005399	0.23805	0.190774	1.79307	0.973949	0.972126	0.961685
S2_F_metrics.txt	F	S34226467_Covered	49995737	0.823854	7513396686	1383350940	5077804360	0.636639	0.363361	0.84451	150.281	0.458134	0.141878	33.7367	44300620	16.7009	23.0532	-1	-1	-1	-1	41189192	3137161264	124755202	124755202	16400005215	85792630	85596847	13974551986	9543208156	2326798298	1	0.687688	0.997718	56.4905	34	3429	0	0.022128	0.317101	0	0.10713	0.005209	0.222143	0.181976	3.32297	0.968478	0.963687	0.907722
S2_G_AO_metrics.txt	GAO	S34226467_Covered	49995737	0.823854	14873830963	3050934999	5290112779	0.772124	0.227876	0.829792	297.502	0.584741	0.175376	40.2032	78646064	6.76985	7.18915	7.69231	8.30728	9.06761	-1	41189192	3137161264	194355199	194355199	25436609935	128983798	128724337	23214878741	15298169556	4460972190	1	0.66365	0.997988	108.304	95	2698	0	0.02068	0.341019	0	0.063105	0.004295	0.23946	0.160012	1.86732	0.971417	0.968634	0.952526
S3_F_metrics.txt	F	S34226467_Covered	49995737	0.823854	9161928714	1390200905	5183997706	0.670567	0.329433	0.868254	183.254	0.489049	0.13853	36.5336	52548531	14.2377	18.046	28.3285	-1	-1	-1	41189192	3137161264	152879787	152879787	18734190730	102409974	101715011	15736127325	10419774860	2595247275	1	0.669873	0.993214	63.008	42	4402	0	0.022221	0.337844	1e-06	0.110479	0.003862	0.238712	0.144244	3.00038	0.96783	0.962479	0.921059
S3_G_AO_metrics.txt	GAO	S34226467_Covered	49995737	0.823854	9327972705	1792674779	3070487551	0.783633	0.216367	0.838798	186.575	0.596171	0.191469	41.2453	59900715	7.94939	8.84997	10.0734	11.9765	15.6604	-1	41189192	3137161264	124083437	124083437	15646463256	86990039	86730016	14191135035	9878434679	2995808419	1	0.701061	0.997011	72.7329	58	2959	0	0.021319	0.303901	0	0.064028	0.004748	0.255613	0.16066	2.20403	0.970203	0.966223	0.943325
S4_F_metrics.txt	F	S34226467_Covered	49995737	0.823854	24369474813	4513797429	12974160323	0.690039	0.309961	0.843723	487.431	0.522154	0.138272	36.5323	91870934	49.6719	102.478	-1	-1	-1	-1	41189192	3137161264	361876905	361876905	46671061430	212643417	211836039	41857432565	24410429099	6453313391	1	0.587613	0.996203	156.675	36	7279	0	0.021962	0.41682	1e-06	0.079805	0.004382	0.192875	0.152002	9.79218	0.970454	0.967295	0.901437
S4_G_AO_metrics.txt	GAO	S34226467_Covered	49995737	0.823854	26711714288	5620881960	6147304387	0.840246	0.159754	0.826154	534.28	0.652888	0.191091	43.5584	129363197	6.3585	6.59978	6.86403	7.15125	7.47065	10.1361	41189192	3137161264	319047209	319047209	40913168411	203344326	202736950	38479900635	24307272448	7818152119	1	0.637349	0.997013	189.811	176	4226	0	0.020143	0.368312	0	0.036681	0.003573	0.244779	0.143525	1.9772	0.971995	0.969302	0.955037
S5_F_metrics.txt	F	S34226467_Covered	49995737	0.823854	5402123489	1082556620	4586386752	0.585732	0.414268	0.833059	108.052	0.411473	0.124315	30.6181	33712248	15.6169	23.4915	-1	-1	-1	-1	41189192	3137161264	100839717	100839717	13128752474	70140942	69975618	11071066861	7651397666	1632101635	1	0.695569	0.997643	39.6245	32	9620	0	0.021952	0.308883	1e-06	0.138379	0.005773	0.208823	0.190774	2.64163	0.967191	0.959592	0.878688
S5_G_AO_metrics.txt	GAO	S34226467_Covered	49995737	0.823854	8444592030	1601944545	3438422630	0.745018	0.254982	0.840548	168.906	0.565507	0.173026	39.2946	51214871	8.0154	9.03791	10.5311	13.0955	19.8668	-1	41189192	3137161264	118431302	118431302	14932780561	81952779	81814387	13484959205	9255052815	2583759731	1	0.691986	0.998311	62.7291	55	8036	0	0.021684	0.313676	0	0.079037	0.004041	0.253309	0.158388	2.02352	0.968345	0.963115	0.936883
S6_F_metrics.txt	F	S34226467_Covered	49995737	0.823854	16726941139	3096836425	7702814373	0.720168	0.279832	0.843782	334.567	0.543175	0.160966	38.1301	85533590	18.2678	21.701	27.9614	49.7719	-1	-1	41189192	3137161264	246822339	246822339	30794777850	160768337	160057984	27526591937	17801861042	4956909772	1	0.651352	0.995582	120.345	51	5176	0	0.020893	0.353285	1e-06	0.083106	0.004804	0.221382	0.157403	4.45722	0.971121	0.968477	0.946903
S6_G_AO_metrics.txt	GAO	S34226467_Covered	49995737	0.823854	23560479754	5297537775	4828637539	0.85666	0.14334	0.816428	471.25	0.65725	0.209813	43.8864	135955697	6.95517	7.22727	7.51617	7.8521	8.22297	11.3673	41189192	3137161264	271437232	271437232	35847062919	185800362	185339141	33686655068	22941257308	7521166057	1	0.684506	0.997518	182.6	149	4147	0	0.019944	0.318981	0	0.042669	0.005083	0.251264	0.158782	2.20001	0.972457	0.970458	0.959115
S7_F_metrics.txt	F	S34226467_Covered	49995737	0.823854	14422931010	3080424734	2826901219	0.860951	0.139049	0.824009	288.483	0.657926	0.218962	44.5158	94299810	24.6159	32.3586	62.5831	-1	-1	-1	41189192	3137161264	169563155	169563155	21921805016	120262492	119781371	20330256963	14353386128	4800035103	1	0.709249	0.995999	116.536	35	4819	0	0.021652	0.293989	0	0.049539	0.005445	0.254723	0.160252	6.85508	0.970379	0.966664	0.920459
S7_G_AO_metrics.txt	GAO	S34226467_Covered	49995737	0.823854	30804168093	6747973106	7821547301	0.827619	0.172381	0.820304	616.136	0.637054	0.18227	42.6	135409182	6.45532	6.68748	6.92419	7.20642	7.50686	9.91037	41189192	3137161264	379180340	379180340	48354118607	232915941	232283825	45373688500	27531339788	8813493092	1	0.614262	0.997286	213.976	191	7992	0	0.019875	0.393231	1e-06	0.039174	0.003792	0.221565	0.148038	1.99977	0.972812	0.971004	0.961835
S8_F_metrics.txt	F	S34226467_Covered	49995737	0.823854	23488366860	5313818118	4311970777	0.869785	0.130215	0.815506	469.807	0.663964	0.211519	44.5085	134905007	25.9324	30.9802	40.4928	80.9811	-1	-1	41189192	3137161264	272794829	272794829	35375942828	185507041	184625881	33114155755	22388577227	7482692979	1	0.680024	0.99525	181.666	46	7842	0	0.020046	0.323897	0	0.048513	0.005142	0.24133	0.155199	7.56943	0.972123	0.968713	0.942001
S8_G_AO_metrics.txt	GAO	S34226467_Covered	49995737	0.823854	15574382137	3181726576	5398589980	0.776499	0.223501	0.830363	311.514	0.589939	0.18442	40.4588	91060053	7.35016	7.80066	8.31414	8.96325	9.748	-1	41189192	3137161264	208244032	208244032	26400009096	142162538	141703317	24154698693	16364484926	4868681078	1	0.682673	0.99677	118.203	95	4767	0	0.020111	0.322513	1e-06	0.066119	0.004924	0.242415	0.162518	2.07374	0.972005	0.969247	0.953078
S9_F_metrics.txt	F	S34226467_Covered	49995737	0.823854	10630488717	2129807655	2592277638	0.83115	0.16885	0.833091	212.628	0.635525	0.214146	43.4486	69301466	21.7458	30.7258	-1	-1	-1	-1	41189192	3137161264	128203935	128203935	16727087333	91285193	91008973	15352574010	10866051912	3582030582	1	0.712031	0.996974	86.9653	28	6448	0	0.021855	0.292233	1e-06	0.057836	0.005512	0.24807	0.163084	5.79769	0.969171	0.964006	0.896128
S9_G_AO_metrics.txt	GAO	S34226467_Covered	49995737	0.823854	17915174523	4071822377	4747374486	0.822424	0.177576	0.814808	358.334	0.624704	0.196983	42.0489	99867892	6.27764	6.56517	6.90593	7.28397	7.73442	12.5648	41189192	3137161264	219049899	219049899	28677859065	147497143	147180369	26734371386	17841998210	5649053661	1	0.67335	0.997852	137.149	117	4586	0	0.019879	0.332619	1e-06	0.046908	0.005053	0.239501	0.164662	1.90485	0.972341	0.96995	0.956719
[truncated: 18 more columns]
