# Supplementary material for: Innovative paraffin embedding to unlock archival blocks for highly demanding genomic analyses
Source: Research Square preprint supplement (doi:10.21203/rs.3.rs-8787286/v1), 2026-02-13
Supplement: Supplementary file 5 [file 749ef70b5082a7c81ea02699.xlsx]

## Sheet: Foglio1
ID	Fixation	Processing	Fixation_Type	#Mapped	#MappedRead1	#MappedForward	MappedForwardFraction	#MappedReverse	MappedReverseFraction	#SecondaryAlignments	SecondaryAlignmentFraction	#ReferenceBp	#ReferenceNs	#AlignedBases	#MatchedBases	MatchRate	#MismatchedBases	MismatchRate	#DeletionsCigarD	DeletionRate	HomopolymerContextDel	#InsertionsCigarI	InsertionRate	HomopolymerContextIns	#SoftClipped	SoftClipRate	ErrorRate	MedianReadLength	SDCoverage	CoveredBp	FractionCovered	BpCov1ToCovNRatio	BpCov1ToCov2Ratio
S1_GAO	G	AO	G	3976982	3976982	1988108	0.499904	1988874	0.500096	52	1.30752e-05	3131139695	237549159	198154650	197115414	0.994755	971365	0.00490206	21015	0.000106054	0.518915	46856	0.000236462	0.902595	337580	0.0848835	0.00524457	53	0.643959	121340129	0.0419341	0.803836	7.48264
S6_G	G	Std	F	1792701	1792701	895592	0.499577	897109	0.500423	28	1.56189e-05	3130346799	239444608	89181389	88722487	0.994854	424054	0.00475496	10309	0.000115596	0.545252	24539	0.000275158	0.909532	179694	0.100236	0.00514571	53	0.178657	76650911	0.0265145	0.884823	10.0089
S13_F	F	Std	GAO	12479889	12479889	6240915	0.500078	6238974	0.499922	110	8.81418e-06	3131613069	237549159	613710730	610243888	0.994351	3184746	0.00518933	79328	0.00012926	0.55926	202768	0.000330397	0.917438	1196011	0.0958351	0.00564898	52	0.236468	394466509	0.136302	0.656828	2.90461
S16_FAO	F	AO	FAO	3767176	3767176	1884051	0.500123	1883125	0.499877	34	9.02533e-06	3126363957	237232400	185370362	184403918	0.994786	884331	0.00477062	26271	0.000141722	0.60268	55842	0.000301246	0.915153	445562	0.118275	0.00521358	52	0.159334	158834340	0.0549765	0.860993	7.25237
S6_GAO	G	AO	G	1290216	1290216	643646	0.498867	646570	0.501133	6	4.65038e-06	3134807548	239850602	64101885	63760465	0.994674	317547	0.00495379	7472	0.000116564	0.52409	16401	0.000255858	0.902384	118430	0.0917908	0.00532621	53	0.181304	54458800	0.0188116	0.876482	9.48481
S5_FAO	F	AO	FAO	3579755	3579755	1790540	0.500185	1789215	0.499815	31	8.65981e-06	3126191356	239444508	176419473	175481563	0.994684	861556	0.00488357	21484	0.000121778	0.569214	54870	0.00031102	0.921177	384089	0.107295	0.00531636	52	0.521084	150490858	0.0521316	0.869814	7.80081
S7_GAO	G	AO	G	6453502	6453502	3227783	0.50016	3225719	0.49984	59	9.14232e-06	3130703162	237549159	320946303	319391912	0.995157	1416448	0.00441335	39384	0.000122712	0.573304	98559	0.000307089	0.920768	667635	0.103453	0.00484315	53	0.190185	242216453	0.0837206	0.777152	4.60413
S10_G	G	Std	F	947246	947246	472222	0.498521	475024	0.501479	7	7.38984e-06	3125163361	237549059	46639292	46381072	0.994463	238585	0.00511554	5790	0.000124144	0.545423	13845	0.000296853	0.917082	92036	0.0971617	0.00553653	52	0.358674	42995721	0.0148897	0.946385	20.3175
S2_G	G	Std	F	3565898	3565898	1781960	0.499723	1783938	0.500277	20	5.60869e-06	3135880249	239850602	172772969	171789532	0.994308	906568	0.00524716	22289	0.000129007	0.549419	54580	0.000315906	0.914731	458478	0.128573	0.00569208	52	0.173337	147672466	0.0509914	0.869251	7.98284
S15_G	G	Std	F	7127064	7127064	3561118	0.499661	3565946	0.500339	56	7.85737e-06	3129344796	238712215	353772037	352036009	0.995093	1582101	0.00447209	43777	0.000123744	0.574069	110150	0.000311359	0.921543	751141	0.105393	0.00490719	53	0.187765	268183602	0.0927768	0.761433	4.17189
S15_FAO	F	AO	FAO	9997814	9997814	5000426	0.500152	4997388	0.499848	85	8.50186e-06	3129927268	237449159	494962856	492399680	0.994821	2333594	0.00471469	64224	0.000129755	0.561659	165358	0.000334082	0.919097	1011153	0.101137	0.00517852	52	0.235749	340453513	0.117703	0.695266	3.27211
S12_GAO	G	AO	G	7152873	7152873	3573976	0.499656	3578897	0.500344	45	6.29118e-06	3136102026	239850602	352429464	350395825	0.99423	1880948	0.00533709	43384	0.0001231	0.551171	109307	0.000310153	0.917809	743883	0.103998	0.00577034	52	0.336412	262731282	0.0907143	0.76705	4.42046
S2_FAO	F	AO	FAO	5223687	5223687	2611085	0.499855	2612602	0.500145	40	7.65743e-06	3131464857	237549159	256017586	254617605	0.994532	1290729	0.00504156	31360	0.000122492	0.548119	77892	0.000304245	0.917206	544124	0.104165	0.0054683	52	0.232612	197351193	0.0681952	0.807122	5.70362
S9_GAO	G	AO	G	3015381	3015381	1507946	0.500085	1507435	0.499915	47	1.55868e-05	3131149819	237549159	149993911	149211694	0.994785	729067	0.00486064	16518	0.000110124	0.536142	36632	0.000244223	0.90137	287864	0.0954652	0.00521499	53	0.248162	105392391	0.0364226	0.79195	6.74353
S4_G	G	Std	F	1216675	1216675	608002	0.499724	608673	0.500276	15	1.23287e-05	3125625506	236966537	59639242	59297880	0.994276	316009	0.00529868	9019	0.000151226	0.607828	16334	0.00027388	0.906636	126042	0.103595	0.00572378	52	0.198366	51795608	0.0179307	0.905758	13.4715
S11_F	F	Std	GAO	6567447	6567447	3284049	0.50005	3283398	0.49995	78	1.18768e-05	3135983699	239850702	321865291	320048018	0.994354	1673241	0.00519858	40359	0.000125391	0.559503	103673	0.000322101	0.918629	747308	0.11379	0.00564607	52	0.186617	248959594	0.0859628	0.782428	4.66136
S14_G	G	Std	F	1391527	1391527	695572	0.499862	695955	0.500138	18	1.29354e-05	3125490171	238229693	69191680	68818002	0.994599	349928	0.00505737	7516	0.000108626	0.530468	16234	0.000234624	0.900148	124123	0.0891991	0.00540062	53	0.39158	52487287	0.0181789	0.872973	12.5924
S13_GAO	G	AO	G	2542329	2542329	1271474	0.500122	1270855	0.499878	26	1.02268e-05	3126483640	237142965	125962733	125269982	0.9945	643654	0.00510988	15172	0.000120448	0.542644	33925	0.000269326	0.906971	238468	0.093799	0.00549965	53	0.231292	98572621	0.034116	0.869483	9.95897
S5_G	G	Std	F	2661325	2661325	1332563	0.500714	1328762	0.499286	13	4.88478e-06	3131121639	237549059	131818648	131124560	0.994735	643316	0.00488031	15156	0.000114976	0.550475	35616	0.000270189	0.913634	244501	0.0918719	0.00526548	53	1.03436	101134243	0.0349513	0.875792	10.14
S3_G	G	Std	F	5085717	5085717	2543284	0.500084	2542433	0.499916	41	8.06179e-06	3122052456	236649878	249112343	247689155	0.994287	1312545	0.00526889	35155	0.000141121	0.582136	75488	0.000303028	0.913536	509712	0.100224	0.00571304	52	0.261961	195688207	0.0678201	0.824505	6.13721
S3_GAO	G	AO	G	813407	813407	405784	0.49887	407623	0.50113	5	6.14698e-06	3106833932	235205297	39731678	39491277	0.993949	224305	0.0056455	5514	0.000138781	0.549329	10582	0.000266337	0.905878	92910	0.114223	0.00605061	52	0.275083	34695048	0.012082	0.928586	19.5344
S2_F	F	Std	GAO	9974237	9974237	4986008	0.499889	4988229	0.500111	78	7.82015e-06	3131835872	237549059	487866533	485109498	0.994349	2534779	0.00519564	63044	0.000129224	0.55428	159212	0.000326343	0.921042	1068442	0.10712	0.00565121	52	0.20786	341571831	0.118016	0.70757	3.39404
S13_G	G	Std	F	1260757	1260757	630330	0.499962	630427	0.500038	13	1.03113e-05	3125742242	237143065	62099222	61746599	0.994322	326183	0.00525261	7891	0.000127071	0.545938	18549	0.000298699	0.905224	129301	0.102558	0.00567838	52	0.186919	56630323	0.0196048	0.932206	16.73
S5_GAO	G	AO	G	1518016	1518016	759219	0.500139	758797	0.499861	9	5.92879e-06	3121156936	236104578	75261188	74854483	0.994596	377878	0.00502089	8649	0.00011492	0.550584	20178	0.000268106	0.916047	149564	0.098526	0.00540391	53	1.3543	63098418	0.0218708	0.922866	14.7138
S10_F	F	Std	GAO	2357202	2357202	1179530	0.500394	1177672	0.499606	21	8.90887e-06	3122046020	237232400	114818759	114162921	0.994288	603937	0.00525992	14434	0.000125711	0.545448	37467	0.000326314	0.919422	274366	0.116395	0.00571194	52	0.164058	103106146	0.035741	0.90546	10.9228
S9_FAO	F	AO	FAO	2489978	2489978	1244317	0.49973	1245661	0.50027	37	1.48596e-05	3131110727	239444608	123641261	123021958	0.994991	566307	0.00458024	14627	0.000118302	0.55965	38369	0.000310325	0.922802	264298	0.106145	0.00500887	53	0.16176	108488913	0.0375178	0.887191	9.30105
S2_GAO	G	AO	G	2432174	2432174	1214742	0.499447	1217432	0.500553	16	6.57848e-06	3125673406	237549059	121216294	120569736	0.994666	603080	0.00497524	13748	0.000113417	0.51302	29730	0.000245264	0.911201	199276	0.0819333	0.00533392	53	0.496173	83063012	0.0287602	0.842483	8.9021
S7_G	G	Std	F	825736	825736	411653	0.498529	414083	0.501471	18	2.17987e-05	3123735891	237043065	41009893	40797158	0.994813	197026	0.00480435	4677	0.000114046	0.544152	11032	0.000269008	0.909355	82662	0.100107	0.00518741	53	0.18056	35623209	0.0123405	0.900918	12.3742
S14_FAO	F	AO	FAO	1517421	1517421	759055	0.500227	758366	0.499773	19	1.25212e-05	3124282027	236866537	75277551	74916185	0.9952	327841	0.0043551	9629	0.000127913	0.566102	23896	0.000317439	0.916262	160270	0.10562	0.00480045	53	0.159649	69838678	0.0241873	0.932386	15.0028
S1_F	F	Std	GAO	12026582	12026582	6010729	0.499787	6015853	0.500213	98	8.14862e-06	3131321125	237549159	587669124	584386710	0.994415	3027954	0.00515248	72849	0.000123963	0.552073	181611	0.000309036	0.916459	1289348	0.107208	0.00558548	52	0.350082	373134892	0.128944	0.663798	3.0379
S12_F	F	Std	GAO	3363241	3363241	1679752	0.499444	1683489	0.500556	26	7.73064e-06	3135039698	239850602	163307357	162346977	0.994119	884942	0.00541887	21088	0.000129131	0.542489	54350	0.000332808	0.920313	412247	0.122574	0.00588081	52	0.205421	142108711	0.0490844	0.877157	8.25503
S14_F	F	Std	GAO	3564373	3564373	1781156	0.499711	1783217	0.500289	46	1.29055e-05	3130679043	239268180	174393621	173433617	0.994495	885076	0.00507516	21584	0.000123766	0.549388	53344	0.000305883	0.917404	414674	0.116339	0.00550481	52	0.169972	149847606	0.0518251	0.866235	7.62408
S10_FAO	F	AO	FAO	1637224	1637224	817897	0.499563	819327	0.500437	24	1.4659e-05	3116862213	236826406	81320062	80914800	0.995016	369077	0.00453857	9876	0.000121446	0.565209	26309	0.000323524	0.9236	174475	0.106568	0.00498354	53	0.146923	75099110	0.0260758	0.927505	14.0519
S4_FAO	F	AO	FAO	1755914	1755914	877728	0.49987	878186	0.50013	24	1.36681e-05	3126027131	237143065	85796442	85324024	0.994494	433661	0.00505453	13874	0.000161708	0.633343	24883	0.000290024	0.905598	215083	0.122491	0.00550627	52	0.188603	77051009	0.0266715	0.91481	12.8148
S13_FAO	F	AO	FAO	2708624	2708624	1353248	0.499607	1355376	0.500393	32	1.18141e-05	3131416329	237549059	134452016	133738543	0.994693	653300	0.00485898	16914	0.0001258	0.560837	43259	0.000321743	0.916457	286885	0.105915	0.00530653	53	0.153687	118519256	0.0409553	0.888628	9.26767
S8_F	F	Std	GAO	4132695	4132695	2063474	0.499305	2069221	0.500695	60	1.45184e-05	3126434306	236510672	204988976	203962007	0.99499	940422	0.00458767	24407	0.000119065	0.550989	62140	0.000303138	0.917927	459975	0.111301	0.00500987	53	0.181271	165640916	0.0573167	0.822998	5.96796
S6_FAO	F	AO	FAO	9602085	9602085	4799696	0.49986	4802389	0.50014	82	8.53981e-06	3136272014	239850702	474237814	471749289	0.994753	2285723	0.00481978	57133	0.000120473	0.559291	145669	0.000307164	0.919695	917038	0.095504	0.00524742	52	0.196528	332699592	0.114866	0.707747	3.40709
S1_FAO	F	AO	FAO	4671812	4671812	2334716	0.499745	2337096	0.500255	51	1.09165e-05	3130738612	237549159	231067709	229887595	0.994893	1083440	0.00468884	26694	0.000115525	0.550273	69980	0.000302855	0.917062	472565	0.101152	0.00510722	53	0.337308	181412927	0.0627034	0.815483	5.83948
S16_F	F	Std	GAO	3212122	3212122	1606363	0.500094	1605759	0.499906	22	6.84905e-06	3126502148	238951521	156767966	155869766	0.994271	822539	0.00524686	24579	0.000156786	0.625005	51082	0.000325845	0.913844	389015	0.121108	0.00572949	52	0.175754	136397050	0.0472362	0.877687	8.37823
S3_F	F	Std	GAO	13537572	13537572	6770060	0.500094	6767512	0.499906	95	7.01751e-06	3126927801	236966637	659956268	656194331	0.9943	3443267	0.00521742	96050	0.00014554	0.597845	222620	0.000337325	0.921454	1424094	0.105196	0.00570028	52	0.237723	416718303	0.144195	0.646469	2.79756
S16_G	G	Std	F	670728	670728	335604	0.500358	335124	0.499642	10	1.49092e-05	3125481463	237232400	33262183	33087939	0.994761	160569	0.00482737	4765	0.000143256	0.60021	8910	0.000267872	0.903367	69690	0.103902	0.0052385	53	0.170585	30723730	0.0106375	0.934071	16.211
S8_G	G	Std	F	1970621	1970621	984630	0.499655	985991	0.500345	34	1.72534e-05	3130427745	237549159	97499592	96977634	0.994647	486452	0.00498927	10985	0.000112667	0.528539	24521	0.000251498	0.908487	195706	0.0993118	0.00535344	53	0.231131	74840533	0.0258706	0.839283	8.57397
S11_GAO	G	AO	G	2023246	2023246	1011891	0.500132	1011355	0.499868	29	1.43334e-05	3130867248	237549059	100987523	100462773	0.994804	488074	0.00483301	10996	0.000108885	0.521553	25680	0.000254289	0.909268	170401	0.0842216	0.00519619	53	0.313454	72445993	0.0250391	0.83593	9.46788
S11_FAO	F	AO	FAO	4342445	4342445	2171715	0.500113	2170730	0.499887	61	1.40474e-05	3135852942	239850702	215093165	213990957	0.994876	1013568	0.00471223	25263	0.000117451	0.552626	63377	0.000294649	0.914338	450408	0.103722	0.00512433	53	0.191791	174627372	0.0602995	0.829366	6.20808
S4_GAO	G	AO	G	1418340	1418340	708741	0.499698	709599	0.500302	19	1.33959e-05	3120733404	236560443	70803178	70419800	0.994585	359282	0.00507438	9370	0.000132339	0.603629	14726	0.000207985	0.892775	109086	0.076911	0.0054147	53	0.361615	42782846	0.0148337	0.827414	11.4637
S6_F	F	Std	GAO	2845458	2845458	1421908	0.499711	1423550	0.500289	35	1.23003e-05	3130629678	237549059	140342362	139613915	0.99481	665561	0.00474241	17481	0.00012456	0.558664	45405	0.00032353	0.922035	312910	0.109968	0.0051905	52	0.172135	123941874	0.0428408	0.888668	9.11209
S12_G	G	Std	F	2402864	2402864	1200817	0.499744	1202047	0.500256	19	7.90723e-06	3130566890	239444508	117512297	116838339	0.994265	622983	0.00530143	14769	0.00012568	0.546618	36206	0.000308104	0.917666	253108	0.105336	0.00573521	52	0.202346	105311446	0.0364258	0.906388	10.9996
S8_FAO	F	AO	FAO	5419956	5419956	2709150	0.499847	2710806	0.500153	60	1.10702e-05	3131402410	237549159	268136126	266757467	0.994858	1264490	0.00471585	31852	0.00011879	0.566746	82317	0.000306997	0.918802	554643	0.102333	0.00514164	53	0.18036	213760460	0.0738671	0.811234	5.45347
S4_F	F	Std	GAO	4749121	4749121	2373310	0.499737	2375811	0.500263	53	1.116e-05	3130979120	237549159	232064661	230803463	0.994565	1140256	0.00491353	42964	0.000185138	0.649521	77978	0.000336018	0.908436	553712	0.116593	0.00543468	52	0.165736	192641171	0.0665788	0.833897	6.03717
S9_G	G	Std	F	3142193	3142193	1570020	0.499657	1572173	0.500343	74	2.35504e-05	3131179478	239444608	156310922	155519274	0.994935	734163	0.00469681	17218	0.000110152	0.534789	40267	0.000257608	0.90789	299203	0.0952211	0.00506457	53	0.229298	114627435	0.0396397	0.803879	6.67472
S7_FAO	F	AO	FAO	4455456	4455456	2225244	0.499442	2230212	0.500558	55	1.23444e-05	3130388040	237549159	220831055	219695096	0.994856	1043449	0.0047251	26085	0.000118122	0.558329	66425	0.000300796	0.916763	473522	0.106279	0.00514402	53	0.186945	175031260	0.060505	0.820244	5.94748
S10_GAO	G	AO	G	2124929	2124929	1061990	0.499777	1062939	0.500223	58	2.7295e-05	3130537432	237549159	105936271	105388437	0.994829	508961	0.00480441	11765	0.000111057	0.518742	27108	0.00025589	0.90405	199230	0.0937584	0.00517135	53	0.223816	78917717	0.027279	0.800495	6.36496
S1_G	G	Std	F	3770363	3770363	1885301	0.500032	1885062	0.499968	35	9.28293e-06	3135278002	239850702	186141094	185116816	0.994497	950531	0.00510651	22214	0.00011934	0.533988	51533	0.000276849	0.916015	360189	0.0955317	0.0055027	53	0.646879	137208109	0.0473879	0.837653	7.24399
S12_FAO	F	AO	FAO	1780247	1780247	888411	0.499038	891836	0.500962	8	4.49376e-06	3135117781	239850702	88193712	87673374	0.9941	485852	0.00550892	10268	0.000116426	0.538664	24218	0.0002746	0.916219	164514	0.0924108	0.00589994	53	0.683041	70019834	0.0241842	0.882422	11.4508
S14_GAO	G	AO	G	8050269	8050269	4027179	0.500254	4023090	0.499746	55	6.83207e-06	3136188057	239850702	403551757	401689604	0.995386	1688458	0.00418399	47698	0.000118195	0.584196	125997	0.00031222	0.926276	689247	0.0856179	0.00461441	53	0.198872	294001572	0.101508	0.733963	3.75528
S11_G	G	Std	F	2465822	2465822	1233496	0.500237	1232326	0.499763	36	1.45996e-05	3130839256	237549159	121749857	121092262	0.994599	608066	0.00499439	14542	0.000119442	0.535415	34987	0.000287368	0.915311	254081	0.103041	0.0054012	53	0.18948	101909786	0.0352228	0.866457	8.65537
S3_FAO	F	AO	FAO	2717205	2717205	1357562	0.499617	1359643	0.500383	39	1.4353e-05	3121629466	236560443	133884044	133153802	0.994546	670872	0.00501084	18191	0.000135871	0.595074	41179	0.000307572	0.918624	294876	0.108522	0.00545429	52	0.210937	112692179	0.0390605	0.875615	9.13521
S8_GAO	G	AO	G	2615589	2615589	1306691	0.499578	1308898	0.500422	18	6.88182e-06	3126824725	237232500	129566275	128860544	0.994553	659722	0.00509177	14741	0.000113772	0.535649	31268	0.000241328	0.89897	237099	0.0906484	0.00544687	53	0.295112	93842567	0.0324761	0.838539	8.77817
S9_F	F	Std	GAO	6435774	6435774	3216875	0.499843	3218899	0.500157	80	1.24305e-05	3131060367	239444508	317419475	315862560	0.995095	1413853	0.00445421	40771	0.000128445	0.572	102291	0.000322258	0.913189	780787	0.12132	0.00490491	52	0.201889	246296930	0.0851762	0.779973	4.54429
S7_F	F	Std	GAO	5940592	5940592	2971349	0.500177	2969243	0.499823	34	5.72334e-06	3131691657	237549159	289014316	287391576	0.994385	1498491	0.00518483	35974	0.000124471	0.562045	88275	0.000305435	0.914664	605662	0.101953	0.00561474	52	0.308167	214496252	0.0741139	0.800051	5.46921
S16_GAO	G	AO	G	4233958	4233958	2116401	0.499863	2117557	0.500137	41	9.68361e-06	3131344692	239534043	210778184	209742466	0.995086	939398	0.00445681	31984	0.000151742	0.646261	64336	0.000305231	0.91776	432940	0.102254	0.00491378	53	0.164852	175220279	0.0605919	0.835872	6.15049
S15_GAO	G	AO	G	5976033	5976033	2989823	0.500302	2986210	0.499698	77	1.28848e-05	3131292300	237549159	298279962	296856371	0.995227	1300606	0.00436035	35129	0.000117772	0.57545	87856	0.000294542	0.921189	618931	0.103569	0.00477267	53	0.176539	233453551	0.0806753	0.7869	4.7048
S15_F	F	Std	GAO	3188061	3188061	1593349	0.499786	1594712	0.500214	29	9.09644e-06	3129361789	237449159	156234518	155361482	0.994412	801999	0.0051333	20176	0.000129139	0.55685	50861	0.000325543	0.922082	368198	0.115493	0.00558798	52	0.170161	135116268	0.0467221	0.872701	8.09351
S5_F	F	Std	GAO	29147332	29147332	14574275	0.500021	14573057	0.499979	156	5.35212e-06	3136364381	239850702	1397283748	1389141558	0.994173	7492371	0.0053621	184826	0.000132275	0.552855	464993	0.000332784	0.915616	3987345	0.1368	0.00582716	52	0.428205	641358778	0.221424	0.436943	1.6004
