# Supplementary material for: Innovative paraffin embedding to unlock archival blocks for highly demanding genomic analyses
Source: Research Square preprint supplement (doi:10.21203/rs.3.rs-8787286/v1), 2026-02-13
Supplement: Supplementary file 6 [file 754f5250df74a530707a4e0b.xlsx]

## Sheet: Foglio1
Compound	Solubility in aqueous / alcoholic media	Solubility in paraffin wax	Notes (precipitation, stability, nucleic acids)	PubMed ID
Zinc chloride (ZnCl₂)	Soluble in deionized water at 1% and 10%; a whitish precipitate appears after ≥1 h (likely Zn(OH)₂) but can be fully resuspended by simple agitation. Soluble at 0.1% in 50% methanol. Addition of a drop of NaOH to 50 mL of 10% solution improves clarity; Tween-20 tested at 1% solution.	Not tested	Working solutions show time-dependent precipitation but remain easily resuspendable.	PMID: 10468155 (PubMed)
Zinc nitrate (typically hexahydrate, Zn(NO₃)₂·6H₂O)	Completely soluble in deionized water at 1% and 10%; no precipitate observed.	Not soluble in paraffin at tested concentrations.	Used as a precursor for ZnO nanoparticles with documented antioxidant activity.	PMID: 39994261 (PubMed)
Zinc sulfate (typically hexahydrate, ZnSO₄·6H₂O)	Completely soluble in deionized water at 1% and 10%; no precipitate observed.	Not soluble in paraffin at tested concentrations.	Widely used zinc source with documented protection against oxidative DNA damage.	PMID: 15922008 (PubMed)
Zinc trifluoroacetate	Insoluble in deionized water at 1%.	Soluble in paraffin wax at 0.05–0.1%.	Zinc salt compatible with paraffin and previously used in zinc-based tissue fixatives.	PMID: 17576663 (PubMed)
Zinc borate	Insoluble in deionized water at 1%.	Insoluble in paraffin at 0.1%.	Evaluated mainly as an inorganic additive with antioxidant/biocompatible properties in biomaterials.	PMID: 39302915 (PubMed)
Basic zinc carbonate	Insoluble in deionized water at 1%.	Insoluble in paraffin at 0.1%.	Poor solubility under tested conditions; characterized as dietary zinc source in rodent studies.	PMID: 30930463 (PMC)
Propyl gallate	Insoluble in deionized water at 1%. Soluble at 0.1% in 50% methanol without visible precipitate.	Not soluble in paraffin at 0.09%.	Phenolic antioxidant, but poor compatibility with paraffin under our conditions.	PMID: 19622380 (PubMed)
Irganox 1010	Insoluble at 0.1% in 50% methanol. Soluble in paraffin at 0.1% and 1%; solubility further improved by adding DMSO (100 µL in 25 g paraffin).	Fully soluble at 0.1–1%; compatible with paraffin embedding.	Primary sterically hindered phenolic antioxidant. In our hands, improved nucleic acid quality; widely used as polymer stabilizer.	PMID: 29414013 (PubMed)
BHA (butylated hydroxyanisole)	Insoluble at 0.1% in 50% methanol.	Soluble in paraffin at 0.1%; thermolabile.	Classical food antioxidant; thermal instability limits use in high-temperature embedding.	PMID: 1934145 (PubMed)
BHT (butylated hydroxytoluene)	Insoluble at 0.1% in 50% methanol.	Not reliably soluble in paraffin at the tested conditions; thermolabile.	Widely used phenolic antioxidant but thermally labile and less compatible with our workflow.	PMID: 12396675 (PubMed)
Zinc acetate dihydrate	Soluble in deionized water at 1%.	Not soluble in paraffin at tested concentrations.	Water-soluble zinc salt with established clinical use.	PMID: 28480298 (PubMed)
Irganox 1076	Soluble in paraffin at 0.1%, 1% and 10%. Soluble in ethanol at 0.1% and 1%, but not at 5–10%.	Excellent solubility in paraffin over a wide concentration range.	Primary phenolic antioxidant; in combination with Irganox 1010 gave the largest improvement in nucleic acid quality.	PMID: 11820500 (PubMed)
“Irganox liquid” (liquid phenolic AO blend)	Soluble in ethanol at 1% and 10%; strong odor, handled under fume hood.	Not systematically tested; used only at small scale.	Liquid formulation of sterically hindered phenolic antioxidants; mainly explored for solubility screening.	PMID: 37177319 (PubMed)
Irgafos 168	Not tested in aqueous media.	Soluble in paraffin at 0.1% and 1%.	Secondary phosphite antioxidant used to regenerate primary phenolic AOs; tested as paraffin additive.	PMID: 22989312 (PubMed)
