# Supplementary material for: Innovative paraffin embedding to unlock archival blocks for highly demanding genomic analyses
Source: Research Square preprint supplement (doi:10.21203/rs.3.rs-8787286/v1), 2026-02-13
Supplement: Supplementary file 7 [file 7e2e69e7512fef6e66cb14c5.xlsx]

## Sheet: Foglio1
ID	Organ	Fixation_Type	DIN
AOV1	Brain	G	5.5
AOV2	Brain	GAO	6.9
AOV3	Spleen	G	2.4
AOV4	Spleen	GAO	6.6
AOV5	Kidney	G	4.2
AOV6	Kidney	GAO	7.2
AOV7	Liver	G	3.3
AOV8	Liver	GAO	5.8
AOV9	Lung	G	3.8
AOV10	Lung	GAO	6.7
AOV11	Brain	G	2.9
AOV12	Brain	GAO	7.4
AOV13	Spleen	G	3.5
AOV14	Spleen	GAO	6.3
AOV15	Kidney	G	3.3
AOV16	Kidney	GAO	7.1
AOV17	Liver	G	3.1
AOV18	Liver	GAO	5.3
AOV19	Spleen	G	6.7
AOV20	Spleen	GAO	6.6
AOV21	Kidney	G	3.9
AOV22	Kidney	GAO	6.9
AOV23	Brain	G	4.5
AOV24	Brain	GAO	6.8
AOV25	Lung	G	3.8
AOV26	Lung	GAO	6.3
AOV27	Liver	G	3.6
AOV28	Liver	GAO	5.9
AOV29	Kidney	G	4.2
AOV30	Kidney	GAO	7
AOV31	Brain	G	4.2
AOV32	Brain	GAO	6.7
AOV33	Brain	G	4.2
AOV34	Brain	GAO	7.3
AOV35	Kidney	G	4.1
AOV36	Kidney	GAO	6.9
AOV37	Liver	G	2.6
AOV38	Liver	GAO	6.8
AOV39	Spleen	G	3.2
AOV40	Spleen	GAO	7.1
AOV41	Lung	G	4.5
AOV42	Lung	GAO	7.2
AOV43	Brain	G	3.8
AOV44	Brain	GAO	7.7
AOV45	Spleen	G	2.9
AOV46	Spleen	GAO	7.2
AOV47	Liver	G	3.9
AOV48	Liver	GAO	7.1
AOV49	Kidney	G	3.4
AOV50	Kidney	GAO	7.1
AOV51	Spleen	G	4.2
AOV52	Spleen	GAO	6.2
AOV53	Lung	G	4
AOV54	Lung	GAO	7.2
