# Supplementary material for: Innovative paraffin embedding to unlock archival blocks for highly demanding genomic analyses
Source: Research Square preprint supplement (doi:10.21203/rs.3.rs-8787286/v1), 2026-02-13
Supplement: Supplementary file 8 [file a26ec0a4bdabb12e9ce5d87d.xlsx]

## Sheet: Sheet1
Factor	Variable	group1	group2	p_value
Fixation_Type	DIN	F	FAO	0.00398227
Fixation_Type	DIN	F	G	0.000627802
Fixation_Type	DIN	F	GAO	8.73061e-07
Fixation_Type	DIN	FAO	G	0.182221
Fixation_Type	DIN	FAO	GAO	5.25426e-06
Fixation_Type	DIN	G	GAO	3.25645e-05
Fixation_Type	DIN_DL	F	FAO	0.409236
Fixation_Type	DIN_DL	F	G	0.0100868
Fixation_Type	DIN_DL	F	GAO	0.201978
Fixation_Type	DIN_DL	FAO	G	0.0943829
Fixation_Type	DIN_DL	FAO	GAO	0.526298
Fixation_Type	DIN_DL	G	GAO	0.502406
Fixation_Type	DeltaDIN	F	FAO	0.0986967
Fixation_Type	DeltaDIN	F	G	0.097345
Fixation_Type	DeltaDIN	F	GAO	0.000203544
Fixation_Type	DeltaDIN	FAO	G	0.00346816
Fixation_Type	DeltaDIN	FAO	GAO	4.63976e-05
Fixation_Type	DeltaDIN	G	GAO	0.0365867
Fixation_Type	Yield	F	FAO	0.864648
Fixation_Type	Yield	F	G	0.0512449
Fixation_Type	Yield	F	GAO	0.439906
Fixation_Type	Yield	FAO	G	0.162201
Fixation_Type	Yield	FAO	GAO	0.446351
Fixation_Type	Yield	G	GAO	0.076894
Fixation_Type	Size_10kb	F	FAO	8.07961e-06
Fixation_Type	Size_10kb	F	G	9.48383e-06
Fixation_Type	Size_10kb	F	GAO	1.71284e-10
Fixation_Type	Size_10kb	FAO	G	0.0976233
Fixation_Type	Size_10kb	FAO	GAO	1.82925e-07
Fixation_Type	Size_10kb	G	GAO	1.42986e-06
Fixation_Type	Size10kb	F	FAO	0.000310369
Fixation_Type	Size10kb	F	G	7.80388e-06
Fixation_Type	Size10kb	F	GAO	1.27511e-10
Fixation_Type	Size10kb	FAO	G	0.01704
Fixation_Type	Size10kb	FAO	GAO	6.78813e-10
Fixation_Type	Size10kb	G	GAO	0.000771697
Fixation_Type	MEDIAN_INSERT_SIZE	F	FAO	0.234139
Fixation_Type	MEDIAN_INSERT_SIZE	F	G	0.286688
Fixation_Type	MEDIAN_INSERT_SIZE	F	GAO	0.000775389
Fixation_Type	MEDIAN_INSERT_SIZE	FAO	G	0.869898
Fixation_Type	MEDIAN_INSERT_SIZE	FAO	GAO	0.00177352
Fixation_Type	MEDIAN_INSERT_SIZE	G	GAO	0.00705434
Fixation_Type	MEDIAN_EXON_COVERAGE	F	FAO	0.63258
Fixation_Type	MEDIAN_EXON_COVERAGE	F	G	0.119508
Fixation_Type	MEDIAN_EXON_COVERAGE	F	GAO	0.164056
Fixation_Type	MEDIAN_EXON_COVERAGE	FAO	G	0.416803
Fixation_Type	MEDIAN_EXON_COVERAGE	FAO	GAO	0.460248
Fixation_Type	MEDIAN_EXON_COVERAGE	G	GAO	0.887903
Fixation_Type	USABLE_MSI_SITES	F	FAO	0.656365
Fixation_Type	USABLE_MSI_SITES	F	G	0.588317
Fixation_Type	USABLE_MSI_SITES	F	GAO	0.135554
Fixation_Type	USABLE_MSI_SITES	FAO	G	0.910765
Fixation_Type	USABLE_MSI_SITES	FAO	GAO	0.327859
Fixation_Type	USABLE_MSI_SITES	G	GAO	0.385288
Fixation_Type	MEDIAN_BIN_COUNT_CNV_TARGET	F	FAO	0.449754
Fixation_Type	MEDIAN_BIN_COUNT_CNV_TARGET	F	G	0.044535
Fixation_Type	MEDIAN_BIN_COUNT_CNV_TARGET	F	GAO	0.952886
Fixation_Type	MEDIAN_BIN_COUNT_CNV_TARGET	FAO	G	0.346784
Fixation_Type	MEDIAN_BIN_COUNT_CNV_TARGET	FAO	GAO	0.581422
Fixation_Type	MEDIAN_BIN_COUNT_CNV_TARGET	G	GAO	0.0505799
Fixation_Type	PCT_CHIMERIC_READS	F	FAO	0.287008
Fixation_Type	PCT_CHIMERIC_READS	F	G	0.576867
Fixation_Type	PCT_CHIMERIC_READS	F	GAO	0.388546
Fixation_Type	PCT_CHIMERIC_READS	FAO	G	0.523701
Fixation_Type	PCT_CHIMERIC_READS	FAO	GAO	0.833041
Fixation_Type	PCT_CHIMERIC_READS	G	GAO	0.445558
Fixation_Type	PCT_TARGET_250X	F	FAO	0.152071
Fixation_Type	PCT_TARGET_250X	F	G	0.0859743
Fixation_Type	PCT_TARGET_250X	F	GAO	0.0127914
Fixation_Type	PCT_TARGET_250X	FAO	G	0.432725
Fixation_Type	PCT_TARGET_250X	FAO	GAO	0.0438103
Fixation_Type	PCT_TARGET_250X	G	GAO	0.0205415
Fixation_Type	TMB	F	FAO	0.32189
Fixation_Type	TMB	F	G	0.290179
Fixation_Type	TMB	F	GAO	0.308585
Fixation_Type	TMB	FAO	G	0.654589
Fixation_Type	TMB	FAO	GAO	0.765249
Fixation_Type	TMB	G	GAO	0.920061
Fixation_Type	MSI	F	FAO	0.109253
Fixation_Type	MSI	F	G	0.583371
Fixation_Type	MSI	F	GAO	0.152162
Fixation_Type	MSI	FAO	G	0.228422
Fixation_Type	MSI	FAO	GAO	0.386062
Fixation_Type	MSI	G	GAO	0.419581
