# Supplementary material for: Innovative paraffin embedding to unlock archival blocks for highly demanding genomic analyses
Source: Research Square preprint supplement (doi:10.21203/rs.3.rs-8787286/v1), 2026-02-13
Supplement: Supplementary file 9 [file a7b21faa1161dac305ca9e06.docx]

**Supplementary material**

**Cells**

HEK and A549 cell lines (obtained from ATCC, Manassas, USA) were cultured in DMEM High Glucose (Euroclone, Pero, Italy) supplemented with 10% FBS (Gibco, Waltham, USA), 1% (v/v) penicillin-streptomycin (Gibco), and 2 mM L-glutamine (Gibco). Cells were washed with PBS 1X (Euroclone, Pero, Italy), treated with Trypsin, resuspended in DMEM High Glucose, and centrifuged for 5 minutes at 1200 rpm. The supernatant was removed and cells were resuspended in DMEM High Glucose. For each condition, 2x106 cells were counted using a Burker chamber.

Cells were resuspended in 1 mL of wash buffer (PBS 1X, BSA Fraction V (Thermo Fisher Scientific, Waltham, USA)), then, after gentle centrifugation, 1 mL of fixative was added. Cells were fixed either in Neutral Buffered Formalin (BioOptica, Milan, Italy) or in GAF (Addax Biosciences, Turin, Italy) and the time of fixation varied between 10 minutes or 24 hours. Finally, cells were centrifuged at 400 g for 3 minutes. Afterward, the supernatant was removed, and cells were washed in wash buffer to remove any trace of fixative.

**Mice**

Balb/c mice were bred under specific pathogen-free conditions (Allentown Caging Equipment, Allentown, NJ, USA) at the Molecular Biotechnology Center (Torino, Italy) and treated according to the European Guidelines and policies, as approved by the University of Torino Ethical Committee. BALB-neuT females, heterozygous for the neu transgene, overexpressing HER2 and spontaneously develop multiple HER2-overexpressing mammary cancers (Quaglino et al., 2008) and were kindly provided by E. Quaglino of the Turin University.

Mouse tissues specimens (spleen, kidney, liver and HER2-overexpressing mammary tumors from BALB-neuT female mice) were collected and fixed alternatively in Neutral Buffered Formalin (NBF) (Diapath, Martinengo (BG), Italy) or in GAF (Glyoxal Acid Free), a 2% solution of acid-deprived Glyoxal in 0.1M Phosphate buffer pH 7.4 (Bussolati et al., 2017), produced by Addax Biosciences S.r.l. (Turin, Italy). This reagent was proven to be a non-toxic (see Technical Report in Supplementary Material) and validated alternative to Formalin (Ryska et al., 2024). Paraffin blocks in cassettes were then prepared using alternatively standard paraffin or AO-Paraffin.

Quaglino E, Mastini C, Forni G et al. ErbB2 transgenic mice: a tool for investigation of the immune prevention and treatment of mammary carcinomas. Curr Protoc Immunol 2008; Chapter 20:Unit 20.9.1-20.9-10.

**Human tumors**

Sampling was performed on specimens optimally preserved during their transfer from the surgical theatre, following the under-vacuum sealing and cooling procedure (Bussolati et al., 2008). The Institutional Ethics Review Board responsible for “Biobanking and use of human tissues for experimental studies” at the Department of Medical Sciences, University of Turin approved this study, which was conducted along the lines of the Profiling Project. We selected specimens large enough to allow multiple, parallel grossing from nearby areas of interest.

**Antioxidants**

Several liposoluble antioxidants (AOs) (BHT (Butylated hydroxytoluene), BHA (Butylated hydroxyanisole), Irganox 1010 (Pentaerythritol tetrakis(3,5-di-tert-butyl-4-hydroxyhydrocinnamate)), Irganox 1076 (Octadecyl 3-(3,5-di-tert-butyl-4-hydroxyphenyl)propionate) and Naugard 168 (Tris(nonylphenyl) phosphite), all from Sigma-Aldich (Milan, Italy) and Chimassorb 81 (Methanone, 2-hydroxy-4-(octyloxy)-phenyl), Irganox HP-136 (3-aryl-benzofuran-2-one ), Irganox 1520 (2-Methyl-4,6-bis(octylsulfanylmethyl)phenol) and Irgafos 168 (Tris(2,4-di-tert-butylphenyl) phosphite), all from BASF Italia, (Cesano Maderno, MB), Italy were tested for their solubility in paraffin and activity in protecting DNA integrity and stability at 70°C (see above).

We finally adopted a mixture of different AOs on the base of their properties and solubility (Azat et al., 2019; Santos-Sanchez et al., 2019; Zehiroglu et al., 2019; Flieger et al., 2021; Hyar and Meydan, 2023), of the additive effect of different reagent and of the principle that synergy between different reagents potentiates their activity (Commisso et al., 2017; Seeram et al., 2005). The final quantity of AOs in the paraffin wax was below 0,5% (w/v). The resulting reagent, AO-Paraffin (genoWax®), was prepared and supplied by Addax Biosciences S.r.l. (Turin, Italy).

Azat Aziz M, Shehab Diab A and Abdulrazak Mohammed A., Antioxidant Categories and Mode of Action. Chapter in “Antioxidants” ed. by [Emad Shalaby](https://www.intechopen.com/profiles/63600). IntechOpen, 2019 DOI: 10.5772/intechopen.83544

Commisso M, Bianconi M, Di Carlo F, et al.,. Multi-approach metabolomics analysis and artificial simplified phytocomplexes reveal cultivar-dependent synergy between polyphenols and ascorbic acid in fruits of the sweet cherry (Prunus avium L.). PLoS One. 2017 Jul 21;12(7):e0180889. doi: 10.1371/journal.pone.0180889.

Flieger J, Flieger W, Baj J, Maciejewski R. Antioxidants: Classification, Natural Sources, Activity/Capacity Measurements, and Usefulness for the Synthesis of Nanoparticles. Materials (Basel). 2021 Jul 25;14(15):4135. doi: 10.3390/ma14154135.

[Uyar, B.](https://www.emerald.com/insight/search?q=Basar%20Uyar) and [Meydan, I.](https://www.emerald.com/insight/search?q=Imren%20Meydan) (2023), "Performance of commercial antioxidants in white mineral oils", [*Industrial Lubrication and Tribology*](https://www.emerald.com/insight/publication/issn/0036-8792), Vol. 75 No. 2, pp. 221-229. [https://doi.org/10.1108/ILT-09-2022-208](https://doi.org/10.1108/ILT-09-2022-2088)

Santos-Sánchez N.F., Salas-Coronado R., Villanueva-Cañongo C. and Hernández-Carlos B. Antioxidant Compounds and Their Antioxidant Mechanism. Chapter in “Antioxidants” ed. by [Emad Shalaby](https://www.intechopen.com/profiles/63600). IntechOpen, 2019 DOI: 10.5772/intechopen.85270

Santos N.A., Cordeiro A.M.T.M., Damasceno S.S., Aguiar R.T., Rosenheim R., Carvalho Filho J.R., Santos L.M.G., Maia A.S., and Antonio G. Souza A.G. Commercial antioxidants and thermal stability evaluations. Fuel. 97, 638-643, 2012.

Seeram NP, Adams LS, Henning SM, et al.,In vitro antiproliferative, apoptotic and antioxidant activities of punicalagin, ellagic acid and a total pomegranate tannin extract are enhanced in combination with other polyphenols as found in pomegranate juice. J Nutr Biochem. 2005 Jun;16(6):360-7. doi: 10.1016/j.jnutbio.2005.01.006

Zehiroglu C, Ozturk Sarikaya SB. The importance of antioxidants and place in today's scientific and technological studies. J Food Sci Technol. 2019 Nov;56(11):4757-4774. doi: 10.1007/s13197-019-03952-x
