# Supplementary material for: Innovative paraffin embedding to unlock archival blocks for highly demanding genomic analyses
Source: Research Square preprint supplement (doi:10.21203/rs.3.rs-8787286/v1), 2026-02-13
Supplement: Supplementary file 10 [file e1962ee27c2890e9073d5bf3.xlsx]

## Sheet: Foglio1
Cancer Type	ID	Fixatives	Condition	Fixation_Type	DIN
Ovarian Cancer	S1_F	F	S	FS	3.2
Ovarian Cancer	S1_F_AO	F	AO	FAO	4.2
Ovarian Cancer	S1_G	G	S	GS	5.7
Ovarian Cancer	S1_G_AO	G	AO	GAO	6.7
Renal Cancer	S10_F	F	S	FS	4.4
Renal Cancer	S10_F_AO	F	AO	FAO	5.9
Renal Cancer	S10_G	G	S	GS	6.4
Renal Cancer	S10_G_AO	G	AO	GAO	8.3
CRC	S11_F	F	S	FS	5.6
CRC	S11_F_AO	F	AO	FAO	5.2
CRC	S11_G	G	S	GS	5.3
CRC	S11_G_AO	G	AO	GAO	6.9
Liver	S12_F	F	S	FS	2.9
Liver	S12_F_AO	F	AO	FAO	6
Liver	S12_G	G	S	GS	6.5
Liver	S12_G_AO	G	AO	GAO	6.2
Liver	S13_F	F	S	FS	2.5
Liver	S13_F_AO	F	AO	FAO	4.2
Liver	S13_G	G	S	GS	5.8
Liver	S13_G_AO	G	AO	GAO	6.1
CRC	S14_F	F	S	FS	2.2
CRC	S14_F_AO	F	AO	FAO	5.7
CRC	S14_G	G	S	GS	5.7
CRC	S14_G_AO	G	AO	GAO	8.2
CRC	S15_F	F	S	FS	3.7
CRC	S15_F_AO	F	AO	FAO	5.8
CRC	S15_G	G	S	GS	5.2
CRC	S15_G_AO	G	AO	GAO	7.9
CRC	S16_F	F	S	FS	6
CRC	S16_F_AO	F	AO	FAO	5.8
CRC	S16_G	G	S	GS	5.5
CRC	S16_G_AO	G	AO	GAO	6.8
Renal Cancer	S2_F	F	S	FS	4.7
Renal Cancer	S2_F_AO	F	AO	FAO	5.6
Renal Cancer	S2_G	G	S	GS	5.5
Renal Cancer	S2_G_AO	G	AO	GAO	7.7
CRC	S3_F	F	S	FS	2.6
CRC	S3_F_AO	F	AO	FAO	2.3
CRC	S3_G	G	S	GS	3.6
CRC	S3_G_AO	G	AO	GAO	6.2
CRC	S4_F	F	S	FS	3.2
CRC	S4_F_AO	F	AO	FAO	3.1
CRC	S4_G	G	S	GS	5.6
CRC	S4_G_AO	G	AO	GAO	7.5
Thymus gland cancer	S5_F	F	S	FS	6.2
Thymus gland cancer	S5_F_AO	F	AO	FAO	5.7
Thymus gland cancer	S5_G	G	S	GS	6.3
Thymus gland cancer	S5_G_AO	G	AO	GAO	6.2
CRC	S6_F	F	S	FS	3.8
CRC	S6_F_AO	F	AO	FAO	6.2
CRC	S6_G	G	S	GS	4.1
CRC	S6_G_AO	G	AO	GAO	7.6
Gastric Cancer	S7_F	F	S	FS	2.4
Gastric Cancer	S7_F_AO	F	AO	FAO	6.1
Gastric Cancer	S7_G	G	S	GS	6.5
Gastric Cancer	S7_G_AO	G	AO	GAO	7.3
Renal Cancer	S8_F	F	S	FS	5.4
Renal Cancer	S8_F_AO	F	AO	FAO	6.8
Renal Cancer	S8_G	G	S	GS	6.2
Renal Cancer	S8_G_AO	G	AO	GAO	7.8
CRC	S9_F	F	S	FS	5.6
CRC	S9_F_AO	F	AO	FAO	5.4
CRC	S9_G	G	S	GS	6.1
CRC	S9_G_AO	G	AO	GAO	7.2
