# Supplementary material for: Innovative paraffin embedding to unlock archival blocks for highly demanding genomic analyses
Source: Research Square preprint supplement (doi:10.21203/rs.3.rs-8787286/v1), 2026-02-13
Supplement: Supplementary file 11 [file e90654f70e24bc34d24dd201.xlsx]

## Sheet: 50kb
	S15_FAO	S13_FAO	S16_G	S8_GAO	S16_GAO	S3_GAO	S11_F	S5_GAO	S14_GAO	S5_G	S10_GAO	S7_GAO	S7_FAO	S3_G	S2_FAO	S4_GAO	S4_FAO	S9_GAO	S8_FAO	S1_G	S14_FAO	S6_G	S12_FAO	S1_FAO	S6_FAO	S2_G	S11_G	S6_GAO	S5_FAO	S6_F	S13_G	S2_F	S16_F	S15_GAO	S1_F	S4_F	S1_GAO	S2_GAO	S12_F	S11_GAO	S9_FAO	S5_F	S16_FAO	S10_G	S9_F	S7_F	S14_F	S12_G	S10_F
chr1_713022_770722	-3.25992	-3.73385	-1.14904	-1.39811	-2.25329	-1.90564	-2.36339	-2.47577	-3.0654	-2.11206	-0.550562	-3.09211	-2.8176	-1.86923	-1.86114	-0.105033	-1.87718	-1.25085	-2.19288	-2.0217	-2.27345	-1.97477	-2.11946	-2.19782	-1.92849	-2.79395	-1.85333	-0.621501	-2.96698	-2.29936	-2.32242	-2.94105	-2.99326	-2.55227	-2.21653	-3.213	-1.08457	-1.22136	-2.54651	-1.47162	-2.09998	-2.96664	-2.66498	-1.90909	-2.78706	-2.49542	-2.67906	-2.57961	-2.21827
chr1_770722_826026	-1.06876	-1.20411	-0.141835	-1.43717	-1.29925	-0.276915	-1.10776	-0.822603	-1.78153	-1.06816	-0.338566	-1.48182	-1.52862	-1.05461	-1.50484	-2.5236	-0.87696	-0.52433	-1.33632	-1.69358	-1.57229	-1.10746	-0.860725	-1.76049	-0.905246	-1.2025	-1.1907	-0.949662	-1.04543	-0.899358	-0.620103	-1.23182	-1.38194	-1.28912	-1.50099	-1.36688	-1.86634	-0.68433	-1.53922	-1.08695	-0.710349	-1.30937	-1.42103	-0.786028	-0.950667	-1.99268	-1.27436	-1.11085	-1.29703
chr1_826026_876586	-0.494251	-0.269756	-0.378868	-0.32797	0.000124394	-0.404442	-0.389132	0.693885	-0.722089	-0.839881	-0.333379	-0.607384	-0.5776	-0.521051	-0.316376	-0.809734	-0.431247	-0.290472	-0.604512	-0.986242	-0.471317	-0.351204	-0.745239	-0.803951	-0.20924	-0.586703	-0.471394	-0.120649	-0.53165	-0.501017	-0.416402	-0.290858	-0.380655	-0.413226	-0.393122	-0.409741	-0.607312	-0.573277	-0.796184	-0.268381	-0.393678	-0.265308	-0.1417	-0.0211156	-0.0162394	-0.963145	-0.703144	0.176301	-0.446563
chr1_876586_926688	-0.20396	-0.146868	-0.0398697	-0.276803	-0.11037	-0.267163	-0.155842	-0.0433992	-0.31984	-0.0163237	-0.46126	-0.490894	-0.690885	0.0134228	-0.395443	-0.182471	-0.310413	-0.394044	-0.106626	-0.432911	-0.422424	-0.257384	-0.473814	-0.648404	-0.30882	-0.218062	-0.280009	-0.452421	-0.084123	-0.337671	0.146126	-0.12206	-0.0490533	-0.297102	-0.292076	-0.214065	-0.58951	-0.0615657	-0.390866	-0.205652	-0.381066	-0.112597	-0.00324505	0.0506634	0.0637994	-0.842546	-0.570163	-0.583177	-0.232135
chr1_926688_977274	-0.599432	-0.881865	-0.585778	-0.762842	-0.415965	-0.121115	-0.928781	0.642428	-0.933101	-0.319828	-0.989562	-0.916922	-1.12831	-0.639814	-1.03029	-0.727088	-0.74564	-0.724218	-0.541678	-0.400818	-0.33905	-1.07603	-1.16473	-0.93364	-0.959084	-0.609941	-1.07471	-0.866575	-0.325389	-0.42768	-0.389107	-0.390578	-0.814627	-0.780009	-0.815726	0.0155895	-1.34393	-0.0377911	-0.687076	-1.09878	-0.768045	-0.153142	-0.285693	-0.115245	-0.267755	-0.81027	-0.750125	-0.39221	-0.770433
chr1_977274_1027319	-0.346774	-0.381701	-0.812054	-0.546892	-0.179626	-0.378545	-0.410392	0.264169	-0.850823	-0.0358908	-0.844912	-0.633923	-1.04094	-0.274117	-0.668656	-0.411481	-0.614641	-0.955758	-0.244205	-0.274751	-0.824444	-0.932844	-0.641423	-0.917387	-0.653553	-0.349978	-0.743911	-0.793817	-0.190131	-0.673513	0.191184	-0.0931648	-0.116251	-0.428694	-0.291232	-0.488028	-1.07804	-0.122733	-0.50062	-0.817225	-0.562753	-0.145482	-0.563863	-0.537335	-0.303919	-0.559684	-0.845951	-0.344945	-0.341148
chr1_1027319_1077608	-0.0610467	0.0914525	0.12527	0.603975	-0.30407	0.540379	0.0348971	0.17942	-0.683389	0.974656	-0.0643745	-0.739848	-0.753786	0.358844	0.117573	0.816832	0.48174	0.215916	0.088973	0.533913	-0.870997	-0.175168	0.437373	-0.164809	0.0706282	0.390738	0.163632	0.155471	-0.174596	-0.224452	0.284452	-0.0236041	-0.148273	-0.0544169	0.194226	0.116283	0.313932	1.01207	-0.234685	0.446204	0.0871543	-0.156405	-0.0658749	-0.701827	0.0913731	-0.0531062	-0.64513	0.00455948	0.151744
chr1_1077608_1127816	-0.587603	-0.538001	-0.522789	-0.147734	-0.6706	-0.0535241	-0.547123	-0.839416	-0.947756	0.0333621	-0.69093	-0.819116	-1.17798	0.023366	-0.397356	0.0259472	-0.413826	-0.775683	-0.132835	-0.0134205	-0.768759	-0.382225	-0.206791	-0.817717	-0.600517	-0.32892	-0.534639	-0.735162	-0.405678	-0.515353	0.167254	-0.337916	-0.449868	-0.418046	-0.180066	-0.166501	-0.330579	0.0432446	-0.910768	-0.460736	-0.900939	-0.405644	-0.363454	-0.341346	-0.445606	-0.550173	-0.921946	-0.490229	-0.22687
chr1_1127816_1177840	-0.0601387	0.153011	-0.412344	0.0700265	-0.114315	0.473024	0.0364189	0.912543	-0.473774	0.700301	-0.316066	-0.38614	-0.526742	0.212505	-0.102638	0.305465	0.178764	-0.251401	0.0709775	0.322785	-0.454872	-0.138976	0.068657	-0.494588	-0.193142	0.451968	-0.272932	-0.0476542	0.274571	0.311969	0.619953	0.21439	0.0415942	-0.00185047	0.134831	-0.335702	-0.346322	0.603252	0.0200989	-0.0635107	-0.127021	0.215256	0.206428	0.620402	-0.0240343	-0.0926748	-0.516595	0.223683	-0.0347584
chr1_1177840_1228080	-0.374712	-0.188534	-0.240299	-0.0168184	-0.241093	0.530335	-0.402926	0.21737	-0.783408	0.388447	-0.511958	-0.727128	-1.04097	0.0510344	-0.233344	0.309838	-0.0969578	-0.558212	-0.354591	0.180452	-1.07854	-0.339708	-0.339006	-0.843608	-0.561334	-0.0774499	-0.525347	-0.412763	-0.364257	-0.577809	0.261837	-0.133802	-0.099061	-0.553428	-0.260744	-0.0231115	-0.372568	0.585643	-0.539459	-0.262476	-0.388608	0.0164452	-0.203228	0.105262	-0.00916393	-0.513404	-0.787886	-0.0929877	-0.481315
chr1_1228080_1278123	0.181465	0.523361	0.2722	0.195555	0.397573	0.665402	0.283619	1.37243	-0.0450737	0.825507	0.118074	0.0627686	-0.0511662	0.588119	0.109592	0.37059	0.314291	0.0487238	0.472871	0.532689	0.426329	0.153839	0.187909	-0.0275412	0.172209	0.670448	0.0241514	0.0745894	0.68668	0.499319	0.671389	0.528874	0.549798	0.312716	0.437595	0.651458	-0.332216	0.770354	0.189433	0.11695	0.208986	0.772279	0.759535	0.498915	0.358103	0.206721	0.206895	0.254741	0.68429
chr1_1278123_1328388	-0.715247	-0.955478	-0.695987	-0.618571	-0.809268	-0.956263	-0.656676	-0.606152	-0.95402	-0.892965	-0.772196	-0.780274	-1.2173	-0.658608	-0.797063	-0.744895	-0.671002	-0.778344	-0.649127	-1.42072	-1.49066	-0.876413	-0.9988	-0.886902	-1.25991	-0.580489	-0.708942	-0.912116	-0.484776	-0.573398	-0.273546	-0.690659	-0.638717	-0.831596	-0.620882	-0.750112	-0.769447	-0.733393	-0.663178	-0.61621	-0.650938	-0.708675	-0.757365	-0.792535	-0.5454	-1.40708	-1.11854	-0.897228	-0.531316
chr1_1328388_1379154	-0.449206	-0.25053	-0.667751	0.262137	-0.532091	0.521493	-0.261371	0.28199	-0.793454	0.698912	-0.74823	-0.45537	-1.17079	0.122002	-0.243549	0.448493	0.0339799	-0.385138	-0.000947075	0.280992	-0.454582	-0.31373	-0.412806	-0.560126	-0.480014	-0.104687	-0.299224	-0.210778	0.109336	-0.409608	0.600953	-0.194706	-0.276826	-0.29838	-0.129139	-0.399815	-0.173198	0.72412	-0.225196	0.264404	-0.412656	-0.218394	-0.298618	-0.106198	-0.0381709	-0.0968318	-0.902209	-0.736973	-0.116738
chr1_1379154_1429424	-0.630271	-0.524752	-0.408213	-0.0059633	-0.768848	-0.764648	-0.46014	-1.17108	-0.967699	-1.054	-0.714514	-0.923654	-1.10107	-0.463215	-0.450666	-0.244604	-0.228491	-0.350289	-0.517845	-1.1925	-0.950449	-0.112914	-0.162577	-0.68455	-0.850944	-0.623282	-0.239498	-0.38964	-1.08613	-0.650986	-0.946228	-0.659479	-0.252146	-0.563461	-0.342545	-0.864782	-0.11461	-0.638411	-0.41132	-0.0780278	-0.149448	-0.822594	-0.820085	-0.560657	-0.542025	-1.45657	-0.780462	-0.430028	0.0855379
chr1_1429424_1480044	-0.763855	-0.227644	-0.304611	0.061848	-0.728497	0.164504	-0.682206	0.10948	-1.15192	0.0581368	-0.822462	-1.20721	-1.02067	-0.0120942	-0.379773	0.184566	-0.244978	-0.5439	-0.213855	0.154574	-0.798772	-0.261452	-0.0305597	-0.701366	-0.875569	-0.239096	-0.571777	-0.554844	-0.518319	-0.818708	0.0460131	-0.23197	-0.229737	-0.593264	-0.470367	-0.965786	-0.284757	0.22306	-0.571283	-0.024704	-0.391514	-0.629034	-0.662421	-0.495793	-0.702957	-0.487672	-1.0147	-0.616505	-0.57639
chr1_1480044_1530970	-0.132531	-0.608706	0.206372	0.290389	-0.0246847	0.139496	-0.029463	0.164248	-0.925906	0.396476	0.161801	-0.385573	-0.63281	0.16097	0.131962	0.0588924	-0.199194	0.475932	-0.348303	-0.274484	-0.989163	0.161175	-0.276494	-0.143868	-0.398641	-0.03568	0.297984	0.577826	-0.179991	-0.331935	0.499102	-0.250309	-0.048468	-0.521139	-0.25567	-0.198133	0.167243	0.0803286	-0.448117	0.0835178	0.15627	-0.255671	-0.239237	-0.798967	-0.0654168	-0.522739	-0.909084	-0.275094	-0.163979
chr1_1530970_1581105	-0.397027	-0.253696	-0.615514	-0.425092	-0.0918331	0.44551	-0.440491	0.65419	-0.855444	0.53431	-0.763329	-0.789045	-1.02526	-0.0352864	-0.379198	-0.0851096	-0.17265	-0.740365	-0.280341	0.230083	-0.566915	-0.767371	-0.50584	-0.523113	-0.678857	-0.0570606	-0.67409	-0.613145	-0.0288655	0.0430196	0.342461	-0.126079	-0.0502208	-0.901442	-0.361947	-0.570304	-0.795165	0.467773	-0.278066	-0.337703	-0.389923	0.0364178	-0.321099	0.294795	-0.647604	-0.485601	-0.698651	-0.538332	-0.0144892
chr1_1581105_1631410	-0.646801	-0.989006	-0.628694	-0.0384852	-0.573402	-2.1726	-0.627047	-1.18482	-1.36278	-1.79584	-0.656223	-1.60121	-1.02914	-0.774644	-0.345789	-0.523506	-0.961259	-0.0341819	-0.879794	-1.5333	-1.08603	-0.153228	-0.860744	-1.01124	-1.01897	-0.805702	-0.406677	-0.0864959	-0.968262	-0.713842	-0.421178	-1.10668	-0.625345	-0.951636	-0.767475	-0.720383	-0.116877	-1.1698	-1.41344	-0.0903638	-0.493175	-1.22028	-1.12724	-1.80719	-0.592364	-1.32768	-1.10809	-0.932164	-1.21724
chr1_1631410_1681486	-1.82964	-2.38267	-1.40864	-1.52632	-2.01298	-2.24103	-1.79628	-1.72205	-2.32415	-2.68102	-2.22488	-2.38376	-2.02814	-2.48289	-2.47444	-2.27235	-2.20113	-1.65124	-1.88249	-2.26644	-1.71977	-1.56793	-2.66265	-3.02812	-2.13558	-3.0759	-2.18888	-1.7689	-2.56654	-2.27987	-2.61955	-2.61407	-2.07464	-1.8996	-2.3245	-1.39116	-2.38824	-3.79104	-2.38258	-2.82738	-1.65447	-1.82451	-1.51149	-2.04252	-1.45221	-2.57758	-2.55776	-1.77525	-2.94614
chr1_1681486_1731676	0.294948	0.175619	0.241013	1.08783	0.310609	1.31149	0.284916	1.43185	-0.280767	1.14519	0.541679	-0.29966	-0.190475	1.04466	0.834505	1.65296	0.534786	0.683766	0.599618	0.925063	-0.0369312	0.702632	1.05845	0.3099	0.160482	0.668722	0.459037	0.727638	0.206864	0.301733	0.624449	0.411723	0.439651	0.0668688	0.385515	0.328091	0.90743	1.70404	-0.0459751	1.03213	0.585631	0.346021	0.314159	0.503393	0.390059	0.430592	0.0562355	0.649921	0.380546
chr1_1731676_1782169	0.0716249	0.23155	-0.583965	-0.251466	0.338242	-0.965504	-0.100591	-0.0725755	-0.551453	-0.244727	-0.379344	-0.200493	-0.618885	-0.265142	0.0456654	0.0830157	0.0813254	-0.890535	-0.222336	-0.969005	-0.0443376	-0.211896	-0.505882	-0.637847	-0.376361	-0.147659	-0.0306959	-0.677635	0.0473524	-0.0260333	0.229745	-0.107131	-0.254492	-0.00732705	-0.356365	0.00127399	-0.973316	-0.0471	-0.274191	-0.609912	-0.35708	-0.124903	-0.151175	0.226921	0.281591	-0.344918	-0.788044	-0.103548	-0.190006
chr1_1782169_1832557	-0.0931632	-0.424349	0.271691	0.155701	-0.307617	-0.579687	0.0476006	-0.261952	-0.484444	-0.367535	0.127726	-0.560438	-0.512157	-0.12523	-0.167091	0.158328	-0.0728932	0.174291	-0.242079	-1.07678	-0.199735	0.0636122	0.00823822	-0.568922	-0.18109	-0.360563	0.280328	0.382487	-0.449969	-0.43953	-0.286145	-0.250248	-0.313785	-0.214157	-0.173627	0.139008	-0.339131	0.0581538	-0.289287	0.273301	-0.208571	-0.38014	-0.13315	-0.816211	0.0615727	-0.764157	-0.581399	-0.371127	-0.237769
chr1_1832557_1882991	0.101509	0.0475636	0.216676	0.425422	0.237921	0.0400493	0.235386	-0.570002	-0.569687	-0.0671803	-0.190878	-0.0240658	-0.331537	0.259257	0.237723	0.211039	0.303101	0.279369	-0.210604	-0.339677	-0.74491	0.0734743	-0.0546756	0.0415553	-0.00243565	-0.150822	0.21443	0.217379	-0.0835407	0.204673	0.207279	0.0696901	-0.0201823	-0.289651	0.12267	0.283795	0.105286	0.12051	0.111314	0.220027	0.271433	-0.158782	-0.117738	-0.125543	0.367901	-0.382589	-0.0646497	-0.502126	0.0284487
chr1_1882991_1933420	-0.0984428	0.186738	0.522618	0.807936	-0.118377	0.813914	0.0881355	0.108934	-0.609424	0.0488257	0.40554	-0.207304	-0.0598978	0.477211	0.585009	0.857036	0.424715	0.651076	0.443461	0.110894	-0.35303	0.890049	0.464786	0.335764	0.153183	0.437864	0.349546	0.477662	-0.288267	0.181425	0.0671416	0.0476052	0.300971	-0.147219	0.461122	-0.793421	0.665938	0.450541	-0.146936	0.90059	0.142978	-0.118421	0.00569523	-0.777969	-0.30905	0.150809	-0.265936	-0.375617	0.0675459
chr1_1933420_1983754	-0.226649	0.331761	-0.154524	0.30137	0.0894809	1.2495	0.0402575	1.27149	-0.346519	0.990487	-0.201559	-0.652471	-0.480221	0.393391	0.14213	0.729821	0.297208	0.145936	0.412925	0.769179	-0.257138	0.193878	0.446193	-0.204328	-0.117384	0.53515	0.169903	-0.0543961	0.301935	-0.195755	0.692149	0.258705	0.442691	-0.105461	0.136725	-0.12906	-0.0807535	1.29258	0.0306295	0.142738	0.162765	0.13692	0.283905	1.02241	0.0170396	0.339318	-0.204125	0.106393	-0.0608263
chr1_1983754_2034019	-0.192535	-0.373166	0.499462	0.695662	-0.302499	-0.336968	0.0633184	-0.564193	-0.240066	-0.0534293	0.345162	-0.478819	-0.348051	0.239285	0.498776	0.892127	0.640214	0.460339	0.261852	-0.244201	-0.345399	0.645978	0.28664	0.15261	0.0365019	-0.171155	0.421132	0.425641	-0.147641	0.0327615	-0.379134	0.0104951	0.162345	-0.055831	0.314391	-0.48795	0.507797	-0.133412	-0.0123374	0.743084	0.574148	-0.160688	0.154906	-0.251288	-0.300905	-0.601049	-0.396176	0.0169907	-0.0840921
chr1_2034019_2084124	-0.106641	0.0955858	0.24195	0.310698	-0.199632	0.168741	0.118333	0.100817	-0.46442	-0.885755	0.0939538	-0.323538	-0.472449	-0.206744	0.161283	-0.112841	0.389884	0.204877	-0.00249712	-0.814034	-0.551728	0.242533	-0.0254781	-0.205587	0.151809	-0.159377	0.352086	0.255699	-0.0779239	-0.0759239	-0.563613	-0.206682	-0.204461	0.185612	-0.0309113	-0.139752	0.145572	-0.923187	0.0954618	0.433391	-0.0497307	-0.155041	-0.171159	-0.172838	0.149453	-0.740021	-0.460662	-0.0542298	-0.368918
chr1_2084124_2134257	0.220623	0.588633	0.40884	0.692696	0.275409	0.380052	0.240672	-0.570151	-0.267756	-0.213818	0.646139	-0.133615	0.170151	0.413295	0.60438	0.437974	0.703823	0.755563	0.227125	-0.285836	-0.248189	0.749834	0.0122445	0.457698	0.419901	0.311775	0.759799	0.813363	-0.133136	0.134177	0.103925	0.177146	0.10387	0.346853	0.569331	0.296089	0.68754	-0.281639	0.0967654	0.831093	0.642114	0.116693	0.124545	-0.680578	0.398513	-0.456032	0.0437614	0.186575	0.308179
chr1_2134257_2184578	-0.182837	-0.388523	-0.194664	0.00433091	-0.285349	-0.133758	-0.151172	0.752531	-0.562622	-0.148014	-0.225826	-0.677463	-0.877896	-0.0923334	-0.152123	0.0240003	0.0996309	-0.142107	-0.379829	-0.128334	-0.808205	-0.188339	-0.495434	-0.538128	-0.359173	0.0241224	-0.218161	-0.0286312	-0.321119	-0.447004	0.118248	-0.159419	-0.149445	-0.383499	-0.112522	-0.537639	-0.386826	0.0449661	-0.325901	-0.0538748	-0.241022	0.0227281	-0.466966	-0.218708	-0.377028	-0.566382	-0.525025	-0.00613851	-0.198951
chr1_2184578_2234718	0.266316	-0.0542291	0.495149	0.538706	0.207414	-0.476377	0.245708	-0.406701	-0.13671	-0.419308	0.479989	-0.163891	0.146057	-0.00785968	0.433232	0.306963	0.146995	0.481872	-0.0503004	-0.809398	-0.267832	0.571483	0.214212	0.248533	0.357944	0.116315	0.47261	0.46163	-0.0812346	0.353172	-0.239899	0.0864605	0.436721	0.105708	0.231797	-0.269213	0.268131	-0.686244	-0.0193287	0.637872	0.517299	-0.0456432	0.191846	0.116134	0.231644	-0.57636	-0.246894	-0.130893	-0.0340749
chr1_2234718_2284734	0.0126477	0.434736	0.10279	0.372422	-0.0880702	0.0258231	0.307052	0.239022	-0.466883	0.327802	0.146427	-0.221468	-0.238687	0.429436	0.179721	0.328201	0.316761	0.11043	0.392889	0.282409	-0.636899	0.219833	0.283626	-0.0105814	0.0840724	0.504419	0.22321	0.166394	-0.0261339	0.317834	0.073677	0.195215	0.50101	0.00197865	0.434249	-0.480726	-0.0102203	0.347872	0.133119	0.384705	0.21154	0.0697731	0.177195	-0.0741084	-0.107503	-0.00763878	-0.193009	0.00110728	0.370969
chr1_2284734_2336193	0.138808	0.175141	0.678964	1.01595	-0.126513	0.195307	0.330733	-0.380535	-0.457519	0.484544	0.777072	-0.551979	-0.150076	0.477234	0.627008	0.694453	0.449575	0.897829	0.491391	0.251003	-1.18743	0.838578	0.429925	0.258606	0.457479	0.152367	0.9453	0.801974	-0.0724195	-0.0546006	0.32936	0.153253	0.342429	-0.109116	0.461179	-0.174814	0.851567	0.870224	0.11186	1.29534	0.367747	-0.0268685	0.126894	-0.561485	-0.0848211	-0.288598	-0.171921	0.0366598	0.138368
chr1_2336193_2386327	0.086919	-0.143286	0.0796747	-0.191427	0.0327213	-0.537285	-0.0251158	-0.0210269	-0.258826	-0.255562	0.069885	-0.305533	-0.272615	-0.35886	0.00634951	-0.363953	0.0459896	0.0593282	-0.153233	-0.697875	-0.0359733	0.0716516	-0.534242	-0.25161	0.0620424	-0.0269794	0.040503	0.122064	-0.589287	0.203243	-0.422043	-0.0350323	-0.188531	-0.0969966	-0.128325	-0.663174	-0.380338	-0.421239	-0.175516	0.0554038	0.0851503	-0.186732	0.182943	-0.0579752	-0.237344	-0.778101	-0.600625	0.141048	0.132337
chr1_2386327_2436333	0.190863	0.245603	0.0746102	-0.177425	0.443596	-0.292594	0.137569	-0.856084	0.0107177	-0.220703	0.159507	-0.149809	-0.130003	-0.0359444	0.0748789	-0.182498	-0.0416668	-0.0573713	0.187137	-0.470148	-0.13737	-0.0103119	-0.51891	-0.187792	0.016476	-0.0442537	-0.0902555	0.1401	0.182696	0.0579183	-0.180173	0.186378	0.235938	-0.00910971	0.0642921	-0.254189	-0.503113	-0.312704	-0.131255	-0.171477	0.222765	0.0732061	-0.00116479	0.0641098	-0.232577	-0.412255	-0.336329	0.133889	0.169788
chr1_2436333_2486354	-0.11822	0.116119	-0.124182	-0.144374	0.244799	-0.0432646	-0.123764	0.0242371	-0.1739	0.00146105	-0.12587	-0.189031	-0.380647	-0.0722188	-0.153511	-0.202939	-0.17228	-0.11595	-0.0898685	-0.34853	-0.812819	-0.00223667	-0.604871	-0.356921	0.347901	-0.00751826	-0.109523	-0.0299894	-0.503863	-0.0714249	-0.00410665	0.0567734	0.0379674	-0.0085511	0.00521133	0.17392	-0.707191	-0.549082	-0.27339	-0.187752	0.157568	-0.143001	0.228909	-0.183186	-0.120287	-0.519679	-0.598818	-0.061585	-0.107819
chr1_2486354_2536457	-0.12157	0.157317	-0.160851	0.138284	-0.00627754	-0.336684	-0.0378134	0.185349	-0.70083	0.0522496	-0.147791	-0.509089	-0.439098	0.000546154	0.00595077	0.287654	0.188183	0.00837554	0.0163924	-0.436668	-0.357781	0.0378814	-0.0722481	-0.103307	-0.008236	-0.286789	0.0464766	-0.165114	-0.0816781	0.0896586	-0.138831	-0.0116654	0.138609	0.00113038	-0.108694	0.116977	-0.104052	0.0195529	-0.438981	0.170311	-0.0453259	-0.17253	0.00758959	-0.206365	0.27772	-0.306135	-0.325515	-0.211587	-0.280262
chr1_2536457_2586737	0.000335829	0.164229	0.396979	0.423056	0.296841	0.436546	0.179976	0.0626652	-0.216127	0.484293	0.278626	-0.258641	-0.125549	0.343344	0.101377	0.758046	0.510191	0.26491	0.281389	-0.121277	-0.553729	0.396532	0.38503	-0.0624695	0.236436	0.16183	0.414942	0.38689	0.123635	0.0611094	-0.190104	0.137004	0.445941	-0.158985	0.210214	0.113743	0.0846587	0.365459	0.0764734	0.319815	0.373664	0.0500214	0.0532547	-0.104258	0.271378	-0.329744	-0.578578	-0.189649	0.0994845
chr1_2686765_2736847	-0.131374	0.101974	-0.0998398	0.629031	0.0939494	0.817853	0.154532	0.534734	-0.721776	1.02768	0.233894	-0.463638	-0.268469	0.513437	0.352121	0.89332	0.365119	0.371511	0.540426	0.509912	-1.54451	0.262091	0.441584	-0.111167	0.110122	0.657221	0.180015	0.33676	0.171528	0.241442	0.465622	0.172086	0.0775096	-0.267736	0.136936	-0.137228	0.272304	1.26558	-0.307921	0.639687	0.171189	0.289813	0.28179	0.147124	-0.401805	-0.192366	-0.0472337	-0.240773	-0.0205735
chr1_2736847_2786879	-0.202395	-0.103488	0.267848	-0.230266	0.106931	-0.53834	0.0623821	-0.251869	-0.682603	-0.511012	0.0931599	-0.465856	-0.227799	-0.0939411	0.141377	-0.294316	0.302984	0.188601	-0.0382601	-0.890441	-0.548582	0.152916	-0.288265	-0.109698	0.150678	-0.142881	0.0984513	0.412257	0.132645	0.0787172	-0.364816	-0.0224862	0.0414888	-0.379503	-0.196555	-0.330558	-0.073366	-0.712065	-0.10817	0.401641	0.234377	-0.159885	0.0802879	-0.617685	-0.511197	-0.696253	-0.346069	0.106183	0.0303805
chr1_2786879_2836924	0.0369404	0.100291	0.330522	-0.241999	0.335998	-0.647635	-0.0209524	0.120604	-0.131247	-0.812027	0.614978	0.0313402	0.151039	-0.31285	0.134736	-0.647362	0.175744	0.309873	0.14591	-1.04608	-0.086569	0.165455	-0.769208	0.00415744	0.580939	0.041994	0.321189	0.46021	0.126363	0.107118	0.122622	0.103851	-0.0504637	0.170237	-0.101215	0.254193	-0.580117	-0.870082	-0.149245	0.19972	0.358602	0.093742	0.391349	-0.138476	0.0144294	-0.693507	-0.471975	0.217354	0.0656756
chr1_2836924_2886954	0.0980187	0.367589	0.795184	0.877834	0.403424	0.0812284	0.480538	-0.108691	-0.257716	0.339438	0.814595	-0.0815396	0.51238	0.458966	0.75175	0.741665	0.531642	0.889189	0.356819	-0.557463	-0.359006	0.923066	0.174298	0.521455	0.797466	0.383445	0.888931	1.09037	0.460485	0.447871	0.332168	0.355386	0.181221	0.115511	0.371208	0.0263296	0.640593	0.078615	0.394452	1.20267	0.513861	0.240446	0.582108	-0.203665	0.00191204	-0.00505002	-0.0962734	0.598295	0.311882
chr1_2886954_2937201	0.0984326	0.389927	0.591337	0.248933	0.455904	-0.756852	0.261875	0.0758382	-0.171357	-0.444477	0.513702	-0.0208762	0.377009	0.0369143	0.42111	-0.337233	0.380235	0.725437	0.231274	-0.677739	-0.557741	0.628011	-0.297519	0.240574	0.623387	0.235117	0.60866	0.69074	0.302902	0.460058	0.208282	0.0590633	0.0602252	0.0346106	0.158569	-0.0178973	-0.0184734	-0.985167	0.139943	0.6011	0.482077	0.254849	0.320841	-0.501632	0.129012	-0.257685	-0.217297	0.265702	0.0086314
chr1_2937201_2987231	-0.0694458	-0.106213	-0.0154416	-0.0758838	-0.0365509	0.0076467	-0.160061	-0.0549918	-0.424222	-0.0544965	-0.0532662	-0.425179	-0.718707	0.00357012	0.0630278	-0.279378	-0.292986	0.141206	0.0349755	-1.07916	-0.18397	0.152707	-0.840638	-0.324192	0.224233	-0.310405	0.0608133	-0.105642	0.0929059	0.0735005	-0.438346	-0.206193	-0.24216	-0.0712608	-0.169341	-0.335835	-0.497027	-0.551992	-0.168446	0.284574	0.0587054	0.0307548	-0.0106166	-0.850414	-0.526925	-0.582871	-0.40657	-0.0735859	-0.359006
chr1_2987231_3037248	-0.195186	-0.421126	0.577386	-0.469727	0.171304	-1.663	-0.120806	-0.597752	-0.520359	-1.18391	0.396963	-0.117821	0.083146	-0.847544	0.0567115	-1.31959	-0.50084	0.24692	-0.254837	-1.34659	0.0177655	0.154184	-1.3373	-0.410494	0.390095	-0.288344	0.240386	0.428744	-0.257373	0.111325	-0.310222	-0.30903	-0.237983	-0.129475	-0.342639	-0.331081	-0.758298	-1.4015	-0.14266	-0.135891	0.188347	-0.147813	-0.0756845	-0.134665	-0.332382	-0.96517	-0.948048	-0.281164	-0.178064
chr1_3037248_3087264	-0.0965185	-0.425961	0.32249	-0.341917	-0.0721975	-0.776391	-0.0891355	-0.498789	-0.572414	-0.561067	0.654193	-0.188479	0.117031	-0.377072	0.246836	-0.748238	-0.725774	0.357924	-0.177198	-1.22429	-0.0822422	0.175653	-0.836424	-0.258891	0.381321	-0.30034	0.30863	0.498377	-0.126423	0.175877	-0.174653	-0.146368	-0.22534	0.0356037	-0.265607	-0.212265	-0.778488	-0.837698	-0.0138629	0.023236	0.230235	0.0771043	0.0343643	-0.371556	0.179946	-0.975884	-1.08896	-0.0451767	-0.15905
chr1_3087264_3137355	-0.0527236	0.0783461	0.332628	0.0352468	-0.156519	-0.127865	0.00428731	-0.409548	-0.473868	-0.913711	0.364034	-0.188316	0.053856	-0.300735	0.148298	-0.345763	0.10148	0.416666	0.0765975	-1.02453	-0.458718	0.3193	-0.369575	-0.282669	0.620253	-0.126026	0.433906	0.311006	-0.0190878	-0.0278824	-0.61409	-0.0193224	-0.0169199	0.0196295	-0.0271896	0.0530602	-0.254356	-0.653105	0.0400169	0.291724	0.465133	0.0650122	0.274499	-0.350766	0.052422	-0.56267	-0.330495	0.0620566	-0.078958
chr1_3137355_3188494	-0.343777	-0.105912	0.202108	-0.147418	0.105956	-0.779762	-0.154635	-0.423473	-0.474805	-0.482703	0.593262	-0.293538	-0.173964	-0.304292	0.22562	-0.797026	0.148711	0.471137	-0.189942	-1.13605	-0.784387	0.409379	-0.512184	-0.354475	0.461964	-0.0558397	0.382576	0.620278	-0.0494533	0.181103	-0.791468	-0.0496879	-0.0911996	-0.0748533	-0.209195	-0.258477	-0.305733	-1.07773	-0.46623	0.374394	0.208863	-0.115719	0.142217	-0.11621	0.0146773	-0.931905	-0.68168	-0.154403	-0.209382
chr1_3188494_3238500	0.164408	0.246159	0.388782	-0.0873497	0.300596	-0.236078	0.229197	-0.0995411	-0.269522	-0.165068	0.467632	-0.0249601	0.281271	0.159678	0.14878	-0.314377	0.597886	0.306791	0.247714	-0.535446	0.0848024	0.331525	-0.802716	-0.22039	0.577103	-0.0995603	0.438628	0.494046	0.0819552	0.167986	0.259734	0.049081	-0.00130731	0.165009	-0.0769195	0.236377	-0.285133	-0.826279	0.0365512	0.200698	0.237327	0.206039	0.494286	-0.251593	0.245777	-0.566589	-0.261322	0.100247	-0.0437964
chr1_3238500_3288522	-0.0317575	-0.29879	0.188269	-0.561858	0.154797	-0.95573	-0.0150585	0.13795	-0.558122	-0.755891	0.379791	-0.151662	-0.13602	-0.657914	0.0915847	-2.0638	-0.367991	0.438707	-0.29863	-1.91146	-0.682705	-0.113569	-1.73626	-0.383987	0.306295	-0.158127	0.254047	0.358045	-0.256389	0.338181	-0.558976	-0.0886478	0.005165	-0.0920908	-0.365643	0.122915	-0.88788	-1.63279	-0.101265	-0.397965	-0.154291	-0.0481612	0.163208	-0.155515	0.498203	-0.889928	-0.525706	-0.22616	0.0056998
chr1_3288522_3338528	-0.0183661	-0.0739831	0.406184	-0.168496	0.299101	-0.10287	0.173535	-0.0695218	-0.418884	-0.248387	0.452508	-0.241563	0.0528071	-0.15617	0.121124	-0.254695	0.0743581	0.451463	-0.0332844	-0.796857	-0.0294464	0.286566	-0.597603	-0.237864	0.273309	0.0111082	0.25306	0.33543	0.160805	0.402599	-0.0212613	0.092769	0.301174	0.191366	-0.098131	-0.0794419	-0.558733	-0.0225635	-0.112157	0.0581993	0.33452	0.0645948	0.0809488	-0.856035	-0.0619818	-0.486669	-0.558053	-0.278908	-0.373127
chr1_3338528_3388574	0.124512	0.227059	0.554533	0.383647	-0.135764	0.230313	0.153698	-0.272613	-0.330552	-0.101217	0.376033	-0.109676	-0.0783871	0.150613	0.336976	0.17292	0.311766	0.501728	0.157038	-0.286332	-0.5121	0.0362613	-0.163677	0.110058	0.267565	0.157893	0.377664	0.356549	0.211042	0.257262	-0.15316	0.184973	0.160215	-0.0756531	0.0365267	0.154648	0.190135	-0.490422	-0.0201849	0.466178	0.49965	0.063715	0.140002	-0.596634	0.418127	-0.332583	-0.320631	0.0547805	0.270373
chr1_3388574_3438599	0.246975	0.415872	0.308658	0.361915	0.0625518	0.529325	0.472298	-0.839623	-0.0414776	0.416905	0.128582	-0.21602	-0.130818	0.370578	0.359219	0.620181	0.803894	0.193386	0.550815	-0.0453864	-0.150018	0.2781	0.189437	0.132867	0.234744	0.430094	0.341514	0.34691	0.721904	0.44102	0.0411704	0.312552	0.454522	0.0134153	0.421642	0.211389	0.176929	0.19062	0.279313	0.577084	0.375706	0.22117	0.422199	-0.110375	-0.142572	-0.453163	0.0799115	-0.120373	0.439436
chr1_3438599_3488626	-0.0116209	0.122032	0.167154	-0.183294	0.137438	-0.276468	-0.0359818	0.168015	-0.607078	-0.590838	0.104897	-0.387084	0.00104891	-0.2581	0.0400287	-0.432535	-0.172956	-0.00401375	-0.208624	-0.724585	0.135144	0.0571157	-0.408953	-0.148136	0.373343	-0.14932	0.200392	0.22004	0.00802826	0.18168	-0.0371462	0.125847	0.0947407	0.0112113	0.0758333	0.0171739	-0.370548	-0.469287	-0.284868	-0.182907	0.149311	0.0419922	0.0614548	-0.029272	0.0753263	-0.825754	-0.736491	0.121114	-0.0882377
chr1_3488626_3538679	-9.74567e-05	-0.0139562	0.20393	-0.0881497	0.121436	-0.161369	0.131202	-0.10883	-0.412048	-0.162945	0.182141	-0.296145	-0.118662	-0.0455318	0.109496	-0.238074	0.000201756	-0.0389833	0.185575	-0.529982	-0.603643	0.143329	-0.492594	-0.197927	0.267668	-0.00612249	0.0477734	0.345793	-0.0670696	0.170015	-0.107008	0.136233	-0.0190849	-0.0387115	-0.0326938	-0.068847	-0.276727	-0.34718	0.0483557	0.0851824	0.0744497	0.0321483	-0.101344	-0.535623	-0.0752899	-0.525586	-0.504813	0.0173077	-0.208033
chr1_3538679_3588746	-0.178902	0.320114	0.34707	0.709889	-0.316834	0.380963	0.204429	0.224359	-0.93393	1.05732	0.215208	-0.798857	-0.307396	0.523792	0.284275	0.80286	0.599192	0.493932	0.225517	0.0162688	-0.245827	0.340154	0.298249	-0.105452	0.330951	0.179155	0.359921	0.253442	0.0812661	0.160947	0.136704	0.136552	0.133724	-0.15353	-0.00903944	-0.109243	0.469722	0.543479	0.0948819	0.656754	0.216902	-0.0295749	0.0480104	-0.126623	-0.0575725	-0.178622	-0.467517	0.0138699	-0.0368443
chr1_3588746_3638779	-0.0700587	-0.185559	0.222738	-0.451574	0.187062	-0.917545	-0.239142	-0.525421	-0.249895	-0.930633	0.0672324	-0.204805	-0.00917633	-0.306916	-0.209004	-0.80087	-0.239845	-0.00151447	-0.0412372	-1.09647	-1.03606	-0.0619008	-0.859414	-0.250844	0.25156	-0.517819	0.0192369	0.202115	-0.140629	0.0947744	-0.412678	-0.209553	-0.0831074	-0.227878	-0.278537	-0.230634	-0.89451	-1.12731	-0.141613	-0.287834	0.0365208	-0.0818662	-0.155167	-0.910843	-0.222262	-0.995407	-0.538048	-0.115607	-0.258611
chr1_3638779_3688908	-0.133796	0.099857	0.0334285	0.212977	-0.234909	-0.312549	0.0436074	-0.236774	-1.11457	-0.385171	0.141035	-0.655787	-0.2317	-0.153894	0.175117	0.137892	-0.0218596	0.291952	0.1681	-0.428696	-0.553646	0.199135	-0.300299	-0.108182	-0.0802049	-0.00900433	0.142964	0.271297	-0.29174	-0.0229738	-0.542154	-0.124408	0.170205	-0.337393	0.0189189	-0.333602	-0.00445233	-0.106192	-0.209968	0.538204	0.268784	-0.147766	-0.0795862	-0.600755	-0.275942	-0.373679	-0.327307	-0.0457183	-0.130214
chr1_3688908_3739224	0.062517	-0.0327877	0.539305	0.659656	-0.0127772	-0.165577	0.0773294	0.235122	-0.408082	0.0257884	0.459118	-0.584729	-0.178198	0.222791	0.365698	0.529297	0.306569	0.616172	0.162677	-0.216597	-0.308584	0.626384	0.121885	0.0601414	0.2627	0.129521	0.466318	0.49115	-0.0312268	0.0898374	-0.0330892	-0.0254621	-0.106752	-0.0587221	0.0829191	-0.297377	0.224302	0.435152	-0.331239	0.62778	0.244545	0.0305154	-0.0246644	-0.17373	0.0575261	-0.246266	-0.433293	0.246967	-0.481241
chr1_3739224_3789529	-0.117625	0.0317129	1.04681	0.669989	-0.0862893	0.0404065	-0.136272	0.354817	-0.368761	0.264541	0.991005	-0.355859	-0.196989	-0.0516528	0.251374	0.27854	0.0406768	1.29653	-0.0745504	-0.434042	-0.581921	0.953646	-0.0269541	-0.444182	0.278103	-0.0366638	0.81994	1.08367	-0.0490026	-0.0587759	0.363098	-0.141819	0.176225	-0.0659405	-0.137124	-0.130224	0.347759	0.160954	-0.353423	0.785361	0.34954	-0.0227831	0.0419171	-0.103698	-0.00961989	-0.39756	-0.710844	0.112408	0.0296965
chr1_3789529_3839792	0.0883084	0.332251	0.86622	0.637271	0.175181	0.46607	0.201793	0.335473	-0.494958	0.283792	0.742507	-0.403216	0.0786363	0.444748	0.537972	0.986388	0.550463	0.759164	0.269031	0.0822694	-0.256067	0.496536	0.503559	-0.225186	0.185425	0.0697593	0.771848	0.879465	0.150822	-0.0294878	0.0921736	0.209813	0.231814	0.226642	0.082997	0.16943	0.470863	0.626814	-0.153333	0.626421	0.504369	0.112926	0.069116	-0.27338	0.153966	0.173325	0.0331793	-0.0737773	0.152567
chr1_3839792_4039933	0.168804	-0.0974574	0.910541	-0.5091	0.18919	-0.437081	0.24367	0.229054	-0.0992136	0.0420154	0.884904	-0.148945	0.297361	0.0983673	0.299668	-1.06953	-0.152471	0.854243	0.127228	-0.627507	-0.200886	0.0409868	-0.464734	-0.410557	0.667705	0.231919	0.497507	0.795665	0.259964	0.210762	0.0429978	0.444568	0.509967	0.344626	0.107625	0.300171	-1.22795	0.00937703	-0.0111524	-0.305403	0.393862	0.277565	0.265801	-0.232767	0.303457	-0.695857	-0.180808	0.039696	0.304758
chr1_4039933_4090155	0.163621	0.124381	0.813406	-0.416199	0.451773	-0.109778	0.097831	0.101471	-0.413762	-0.131769	0.566657	-0.205777	-0.148366	0.174245	0.0920555	-0.691257	0.23301	0.49106	0.108873	-0.758883	-0.440811	0.210769	-0.711567	-0.693695	0.144945	0.37334	0.284366	0.6428	0.142447	0.414428	0.0750479	0.163788	0.0621241	0.102209	-0.0353786	-0.311612	-1.35184	-0.825546	-0.0331391	-0.252241	0.201761	0.0763267	0.310743	0.271846	-0.11629	-0.398476	-0.0392241	0.109398	0.247049
chr1_4090155_4141181	0.0464278	0.189098	0.611012	0.120156	-0.118046	-0.445367	0.0828171	-0.323932	-0.435447	-0.502356	0.794527	-0.394488	-0.0960591	0.0443727	0.00112159	-0.0854502	0.0567164	0.469166	0.101214	-0.369498	-0.732146	0.172814	-0.174434	-0.23145	0.318387	0.0626897	0.283539	0.335999	0.0546802	-0.0878806	0.349394	-0.0588752	0.252597	-0.0598545	-0.251795	-0.285471	-0.365415	-0.304954	-0.166379	0.50384	-0.290601	-0.00702744	0.285767	-0.185486	-0.177132	-0.693002	-0.355903	-0.0170261	-0.112891
chr1_4141181_4192550	0.229545	-0.375876	0.381448	0.152945	0.326073	-0.378367	0.129506	0.193546	-0.259973	-0.0945002	0.389631	-0.106578	0.0965022	0.0115558	-0.199203	-0.915734	0.330788	0.103011	-0.128928	-0.412491	-0.199665	0.391128	-0.450294	-0.216862	0.474773	0.26608	0.4603	0.278874	0.45415	0.417164	-0.196208	0.371064	0.427286	0.269426	0.117633	0.0541501	-1.14217	-0.239553	0.160832	-0.0275065	0.288808	0.345703	0.3123	0.0549909	0.0016362	-0.195642	-0.030849	0.0909861	-0.097356
chr1_4192550_4242858	-0.0388719	-0.183673	-0.218595	-0.840474	0.215449	-0.276777	0.262259	-0.106761	-0.518057	-0.223268	-0.279766	-0.145834	-0.373374	-0.127962	-0.278342	-1.39989	0.0639445	-0.468197	0.0591821	-1.06576	-0.730583	0.0449072	-0.47463	-0.687686	-0.0704567	0.0598098	-0.348492	-0.442399	0.196469	-0.139921	-0.0169857	0.100304	0.096282	-0.0152592	-0.0454057	-0.101279	-1.35577	-0.600382	-0.351814	-0.374177	-0.279785	0.129406	0.0538842	-0.315751	-0.244328	-0.235082	-0.429743	0.0287693	-0.204573
chr1_4242858_4293520	-0.13208	0.0710346	0.32049	-0.488013	0.359414	0.218272	-0.0864772	-0.0809122	-0.418331	0.127131	0.247166	-0.245518	-0.165168	-0.392193	-0.126004	-0.968468	-0.0222285	0.0203435	0.0933519	-0.582885	-0.212333	0.0911437	-0.361811	-0.404392	0.085242	-0.205923	0.0332956	-0.264355	-0.16705	-0.0252219	-0.149061	0.140882	-0.197054	0.153331	-0.210975	-0.168085	-1.15604	0.131893	0.0141934	-0.0435874	0.156477	0.0583452	0.276554	0.240528	-0.315163	-0.476226	-0.365351	-0.242462	-0.0837468
chr1_4293520_4345169	0.0130964	-0.476567	0.46534	-0.0726526	0.0649782	-0.217564	0.0238137	0.325627	-0.508444	0.129693	-0.0290089	-0.155774	-0.0553037	0.122562	-0.0706735	-0.226945	0.261841	-0.112205	0.283022	-0.587578	-0.281533	0.0414706	-0.568231	-0.371975	0.153627	0.138844	0.0552088	-0.362349	-0.0678027	0.119305	0.0834563	0.1723	0.464131	-0.0343762	-0.063814	0.00170313	-1.42406	-0.0956047	-0.235034	-0.165536	-0.255069	0.150867	0.180435	0.477087	-0.0178237	-0.489785	-0.155128	-0.21226	0.173625
chr1_4345169_4395315	-0.144445	0.260931	-0.98507	-0.882478	0.161012	-0.0366897	-0.198936	-0.15572	-0.357839	-0.143399	-1.11388	-0.0892587	-0.239742	0.042799	-0.426098	-0.81238	-0.0658288	-1.04787	0.0121935	-0.820044	-0.149214	0.0467733	-0.338234	-0.171831	0.000249267	-0.0158322	-0.378305	-0.721375	0.405595	0.0871717	-0.0470437	-0.170474	-0.111994	-0.0753193	-0.237968	0.0226858	-1.1894	-0.176657	0.180784	-0.667269	0.20148	0.229389	0.506306	0.150773	0.101529	-0.50758	-0.470953	-0.0345833	-0.391856
chr1_4395315_4445561	0.268011	0.322786	0.104287	-0.0582241	0.585761	0.379071	0.199119	0.0577773	-0.000650324	0.163767	-0.148422	0.0692121	-0.281135	0.272107	-0.149066	-0.543366	-0.0110674	-0.212329	0.135498	-0.79781	-0.444199	0.159136	-0.166591	0.04449	0.464549	0.491972	0.00838966	-0.134269	0.398472	0.70484	-0.0624139	0.470743	0.454992	0.245377	0.138378	0.28231	-0.912079	-0.176237	0.226909	-0.298005	0.172321	0.334539	0.431562	0.778652	-0.0179522	-0.531147	-0.18952	0.220872	0.10178
chr1_4445561_4495570	0.458926	0.458442	0.534438	-0.00504136	0.614012	0.498187	0.384373	0.358839	-0.163589	0.276149	0.385119	-0.0669999	0.333174	0.365347	0.358507	-0.419483	0.118121	0.524384	0.519669	-0.623564	0.169722	0.353249	-0.131949	-0.04283	0.57882	0.130487	0.394882	0.627769	0.348537	0.623284	0.41137	0.338709	0.357722	0.0533394	0.145317	0.0715475	-0.273036	-0.139943	0.320884	0.660694	0.26597	0.412585	0.438358	-0.331839	0.126219	-0.251964	-0.0978683	0.186836	0.191038
chr1_4495570_4545670	0.175124	0.236433	0.729768	0.375656	0.162786	-0.25467	0.320114	0.106964	-0.252596	-0.512182	0.869292	0.0058257	0.172946	0.367527	0.465564	0.460689	0.383208	0.799653	0.482103	-0.403039	0.233619	0.432862	-0.288564	-0.411006	0.666947	0.11277	0.455253	0.834311	0.475297	0.515763	0.203691	0.188605	0.546412	0.459333	0.165896	0.238528	-0.329537	-0.302363	0.207028	0.715956	0.495195	0.408861	0.544132	-0.864407	-0.143032	-0.224802	0.0528891	0.372282	0.0977411
chr1_4545670_4595868	0.171784	0.131658	0.0618939	0.0647532	0.68171	-0.437221	0.225748	0.54172	-0.125651	-0.190967	0.0151157	0.0891259	-0.0563044	0.0391097	0.28938	-1.04977	0.539962	-0.156438	0.451883	-0.41388	-0.381117	0.298366	-0.724533	-0.256107	0.161752	0.506026	-0.113685	-0.0400946	0.48025	0.564724	0.354601	0.422956	0.512941	0.356904	0.191138	0.170575	-1.0626	0.0969315	0.405372	-0.632226	0.0487079	0.45579	0.586822	0.25133	-0.0314968	-0.0973117	-0.377108	0.221729	0.198537
chr1_4595868_4646047	-0.0259346	0.184677	-0.388579	0.104894	-0.0780567	-0.00896787	-0.162963	0.660646	-0.644945	0.216357	0.0572076	-0.183377	-0.117877	0.15395	0.056005	-1.17515	-0.254609	0.324682	-0.137411	-0.62884	-0.40697	0.0682062	-0.593411	-0.545013	0.0947939	-0.329146	-0.129995	0.00298071	0.413312	0.0222357	-0.0344916	0.183583	0.130865	0.164145	-0.20619	-0.219212	-1.66938	-0.0826726	0.0440083	0.424764	0.163646	0.144969	0.0181041	-0.133904	-0.286787	-0.289195	-0.264031	0.109264	0.270992
chr1_4646047_4696214	0.0589083	0.144181	0.837953	-0.009777	0.385329	0.308872	0.207631	0.0453468	-0.0788672	-0.0784145	0.374446	0.0251284	-0.055358	0.250603	-0.0610075	-0.977059	0.128782	0.243023	0.149839	-0.764445	-0.0941385	0.339463	-0.599719	-0.425389	0.40713	0.18665	0.17542	0.400608	-0.0601036	0.36417	0.0691315	0.259753	-0.158886	0.15238	0.00461633	0.0751224	-0.995958	-0.562597	-0.186786	-0.506808	0.281892	0.23277	0.223687	0.0799024	-0.217131	-0.67866	-0.638091	-0.095862	-0.26344
chr1_4696214_4746254	-0.0120658	-0.019746	-0.0079434	0.216348	0.24093	0.854436	0.07272	0.810439	-0.187991	0.399923	-0.465762	-0.134342	-0.467919	0.252533	0.146797	0.532097	0.220027	-0.367092	0.279888	0.0784279	-0.200913	-0.0642514	-0.136794	-0.603379	0.138092	0.357812	-0.0295336	-0.266408	0.0826214	0.123411	0.525615	0.363828	0.133091	0.0158633	0.0632488	-0.133872	-0.325898	0.672577	0.000905117	0.15208	0.0416926	0.360076	0.117817	0.137035	-0.0328912	-0.133446	-0.0421584	0.332888	0.113712
chr1_4746254_4796810	-0.162424	0.282852	0.31552	-0.711886	0.108257	-0.34485	0.0571701	-0.211354	-0.402449	-0.0629651	0.247977	-0.106571	-0.0231348	-0.16125	-0.0505263	-1.24487	0.168743	-0.00162369	0.132962	-0.607148	-0.241012	0.150934	-1.01674	-0.477338	0.305729	0.210118	-0.0254611	0.451985	0.315264	0.0763037	0.322064	0.195238	-0.159448	0.0897748	-0.22583	-0.298708	-1.29278	-0.224173	-0.165803	-0.421564	-0.221607	0.194435	0.264559	-0.0153538	-0.270584	-0.676418	-0.770013	0.0874136	0.0602338
chr1_4796810_4846899	0.337539	0.299409	0.0671095	-0.390786	0.253935	-0.974555	0.197677	0.264515	-0.363979	0.177495	0.0314856	0.190425	-0.0144008	0.109012	-0.0528856	-1.24764	0.0778523	-0.103581	0.0569181	-0.61491	0.383273	-0.0428452	-0.936623	-0.594641	0.507782	0.343974	0.313656	0.0409305	0.314583	0.324007	0.284246	0.452843	0.243913	0.0455628	0.189932	0.11994	-1.84298	-0.705415	0.0698263	-0.663728	0.0373475	0.451382	0.560463	0.18345	0.262044	-0.125854	-0.261092	0.454608	0.527166
chr1_4846899_4896979	0.183893	0.292406	0.444882	-0.181805	0.0678158	-1.1249	-0.0164381	0.130638	-0.555388	-0.171602	0.0763929	-0.228797	-0.446575	0.0477515	-0.10989	-1.22467	0.264114	-0.0890319	0.252216	-0.845941	-0.439512	0.337841	-0.131929	-0.605546	0.324338	0.117775	-0.306685	-0.0739531	-0.156098	0.0981279	-0.0145771	0.130785	0.0868971	0.106564	-0.115815	0.0447995	-1.0383	-0.584756	0.481412	-0.255754	0.295503	0.164166	0.366954	-0.332033	-0.134733	-0.389842	-0.656071	0.104804	-0.27205
chr1_4896979_4948712	0.134566	0.185171	0.33084	-0.24983	0.34053	-0.211157	-0.154585	0.371382	-0.532988	-0.104494	-0.258378	-0.351968	-0.201158	-0.0481836	0.339472	-0.456445	0.105391	-0.435835	-0.0962342	-0.736891	-0.863163	0.0591545	-0.538061	-0.360204	0.233051	0.384022	-0.139231	0.599787	0.401614	0.129993	-0.0954984	0.166607	-0.0422056	-0.177111	-0.372242	-0.100708	-0.853113	-0.546721	-0.164948	0.0309773	-0.238509	0.087439	0.304368	0.0771848	-0.122021	-0.485128	-0.291761	-0.0384316	0.133689
chr1_4948712_4998756	-0.00143971	-0.0106011	0.336294	-0.224586	0.293011	0.0882003	0.0738204	-0.316981	-0.317314	0.122755	-0.958062	-0.125947	-0.184133	0.0639958	0.106146	-0.689117	0.0681964	-0.313586	0.355589	-0.465043	-0.005465	-0.276488	-0.0935029	-0.0855807	0.291824	0.155555	0.0613769	-0.627458	0.210548	0.421429	0.142399	0.199742	0.202584	-0.338885	-0.00830225	-0.00316649	-0.865521	-0.25929	0.0283711	-0.829585	0.283517	0.236897	0.183242	0.6495	-0.155054	-0.0249894	-0.0804427	-0.0708724	0.510582
chr1_4998756_5048835	0.210935	0.287351	-0.278885	-0.44267	0.250186	0.541455	0.043599	0.244405	-0.186751	0.025628	-0.267245	-0.20563	-0.231994	0.11265	0.176782	-0.407763	0.138145	-0.176957	0.22686	-0.744113	0.00265073	-0.143772	-0.512986	-0.296404	0.699259	0.33487	-0.0112893	-0.191232	0.493923	0.68339	0.310262	0.463462	0.514104	0.187455	0.0093111	0.241424	-1.17303	-0.422094	0.161546	0.182988	0.353484	0.462767	0.413946	0.0837292	0.089026	-0.270751	0.023462	-0.0105466	0.089825
chr1_5048835_5098854	0.186121	0.137549	-0.102435	-0.507657	0.221674	0.0149364	0.201648	0.199523	-0.183401	0.207404	-0.0682653	-0.0103742	-0.152213	0.162681	0.25751	-0.236113	0.319188	-0.386153	0.372886	-0.730754	-0.0565544	0.329999	0.136108	-0.383158	0.189831	0.00484982	0.318356	-0.117244	0.489099	0.526949	0.00833257	0.319518	0.522708	0.115209	0.0108969	0.0254304	-0.60108	-0.14223	0.100724	0.106654	0.124568	0.38935	0.225603	0.415117	-0.110203	-0.0117664	-0.221978	0.157668	0.434349
chr1_5098854_5150381	0.113083	-0.021388	-1.1957	0.225958	0.0555624	0.348106	0.105808	0.0170991	-0.555568	-0.263329	0.347139	-0.175666	-0.488135	-0.00516249	0.202647	-0.195053	-0.0900842	0.0271591	-0.0694997	-0.623177	-0.277149	0.107972	-0.832103	-0.469839	-0.0662863	-0.255135	0.000909752	-0.117662	-0.251876	0.221155	0.272043	-0.103529	-0.274437	-0.14646	-0.030047	0.0146233	-0.564591	0.442421	-0.25856	-0.0317479	0.198685	0.07595	0.187553	0.0916878	-0.18481	-0.47284	-0.565722	0.0979057	-0.236031
chr1_5150381_5201665	-0.120469	-0.200368	0.0229125	-0.162783	0.232804	-0.0926453	-0.057814	0.00589042	-0.248656	0.00229276	-0.308512	-0.196688	0.00436052	0.0599495	-0.125543	-1.24076	-0.18206	-0.263724	0.337417	-0.523382	-0.615521	0.43252	-0.452799	-0.405908	0.240792	-0.129751	-0.1301	-0.832673	0.281748	0.195252	0.0050257	0.0526697	0.370621	-0.0355455	-0.0550226	-0.173647	-1.01715	-0.112889	-0.124641	-0.0938573	0.0637535	0.0577581	0.00986517	-0.141913	-0.099337	-0.425772	-0.680509	0.155691	-0.00124664
chr1_5201665_5252288	0.0306696	-0.0585113	-0.677787	0.0488395	0.215265	0.0479936	0.0830863	0.2073	-0.133172	-0.289807	-0.0640697	-0.167432	-0.0547855	-0.0125315	0.209864	-0.527443	0.531638	-0.270765	0.285583	-0.379622	-0.0556689	0.200337	-0.816557	-0.42699	0.308882	0.190442	0.196971	-0.430075	0.481773	0.36157	-0.0361666	0.126708	0.247788	0.161957	-0.0376786	0.150412	-0.95809	-0.305023	0.0761269	-0.390401	-0.00836574	0.1951	0.289664	-0.0231491	-0.433626	-0.40878	-0.234974	-0.0564162	0.345363
chr1_5252288_5302358	0.114578	0.229812	-0.265413	0.0865509	0.302912	0.00578365	-0.0463206	-0.100978	-0.259952	0.147686	-0.309252	-0.0379106	0.0228389	0.199853	0.120427	-0.543538	0.00399999	0.191206	0.422053	-0.400484	-0.693408	-0.0528488	-0.453172	-0.360086	0.396364	0.17803	0.365124	0.228144	0.212053	0.544693	-0.11533	0.465628	0.387953	-0.183704	0.0236851	-0.0395317	-1.07167	-0.113626	0.0371047	-0.146924	0.402854	0.314587	0.300701	-0.142082	0.0312261	-0.389997	-0.0483761	0.208948	0.357261
chr1_5302358_5352408	0.23062	0.468914	-0.129928	-0.209214	0.371944	0.427364	0.155551	0.138625	-0.367421	0.11152	-0.500093	-0.330211	-0.302706	-0.0907686	-0.230151	-0.775635	0.0489736	-0.345604	0.0533093	-0.617311	-0.809495	-0.213297	-0.196848	-0.755725	0.170199	0.00281572	-0.180271	-0.234181	0.474672	0.411027	-0.0139151	0.112638	0.144514	-0.10723	-0.11044	0.111201	-1.01762	-0.0831805	0.0436427	-0.6132	0.26779	0.197004	0.40417	-0.0784784	-0.146751	-0.654835	-0.210403	0.269668	0.288677
chr1_5352408_5402509	0.213584	0.261576	0.482522	0.233337	0.721373	0.700372	0.133171	0.288438	0.0334556	0.196434	0.312508	0.0349272	0.218238	0.18046	0.120163	-0.071313	-0.185925	0.02344	0.598284	-0.0633234	-0.45188	0.385272	-0.551165	-0.00183427	0.702797	0.522666	0.352589	0.0412301	0.291859	0.532067	0.233309	0.421044	0.203204	0.381724	0.243299	0.167255	-1.08598	0.120814	0.295633	0.136895	0.0172914	0.505247	0.374451	0.250588	0.084299	-0.225733	-0.147945	0.373513	0.11674
chr1_5402509_5452540	-0.0844397	-0.140415	-0.277027	-0.178683	0.143397	-0.339482	0.120698	0.800303	-0.268621	0.215656	-0.749816	-0.0728183	-0.213522	0.11296	-0.090191	-1.14166	0.0645226	-0.385011	0.455429	-0.646569	-0.511501	-0.44505	-0.168787	-0.496765	0.487665	0.274427	0.136515	0.0165747	0.324078	0.144338	0.38866	0.156174	-0.0420125	-0.0172609	-0.0443366	-0.11218	-0.733767	0.00276618	0.233857	-0.32553	0.593496	0.265272	-0.0634599	-0.268705	-0.22489	-0.522056	-0.511312	0.257043	-0.298648
chr1_5452540_5502595	0.257717	0.436609	-0.762868	-0.281979	0.595702	0.330618	0.345545	0.232281	0.0071219	0.119207	-0.522921	-0.0540535	0.00173833	0.318379	0.0405344	-0.0451516	0.39275	-0.531039	0.519892	-0.459577	-0.0971259	0.308947	-0.644634	-0.159936	0.53184	0.263594	0.288807	-0.220075	0.692289	0.466197	0.468686	0.481226	0.327413	0.432489	0.0790595	0.146351	-1.05149	-0.0392392	0.394206	-0.634339	0.388531	0.574426	0.621383	0.503786	0.255083	-0.106188	-0.114253	0.290818	0.398576
chr1_5502595_5552934	-0.00584128	0.49136	-0.464796	-0.837225	-0.101983	0.100781	0.0922687	0.280793	-0.182128	-0.199849	-0.700993	-0.283643	-0.155776	-0.0295697	-0.155731	-1.17327	0.126198	-1.01593	0.153502	-0.445477	-0.0453406	-0.0824054	-0.627071	-0.544176	0.34195	0.113589	-0.18212	-0.501726	0.220843	0.23402	0.237559	0.167426	0.36451	0.0955875	-0.085926	0.116249	-1.64185	-0.241125	0.137533	-0.614713	-0.0312066	0.26723	0.327072	0.0773868	-0.451047	-0.420205	-0.355516	0.220105	0.197443
chr1_5552934_5603030	0.0536444	0.436341	0.405639	-0.205536	0.264169	-0.630762	-0.0144061	-0.105463	-0.239032	-0.00614486	0.681208	-0.0900185	-0.14666	-0.0891038	-0.156391	-0.399951	0.257277	-0.00320232	0.283667	-0.557588	-0.253733	-0.172575	-0.474489	-0.345225	0.256235	0.109563	0.0457637	0.043279	0.112944	0.374358	0.250781	0.263625	0.317423	0.367714	-0.0724552	0.216635	-1.4033	-0.140199	-0.123079	-0.4711	0.207495	0.32245	0.180456	0.284292	-0.02416	-0.415953	-0.185768	0.20455	0.125589
chr1_5603030_5653282	0.293042	0.4781	-0.0953106	-0.357578	0.367354	-1.10328	0.290335	-0.154002	-0.0112005	-0.026208	-0.331085	-0.0435691	-0.157046	0.168084	0.24655	-0.75442	-0.0611537	-0.0416853	0.241169	-0.805418	-0.16739	0.476378	-0.521121	-0.154428	0.324199	0.112626	-0.161427	-0.136634	0.471193	0.367112	0.276388	0.404145	0.3564	0.50032	0.0498214	0.160378	-1.30997	0.120442	0.370574	-0.0887194	0.34169	0.317685	0.22368	0.159647	0.213566	-0.514435	-0.135962	0.0839643	0.322942
chr1_5653282_5703503	0.389331	0.234265	0.576655	0.132272	0.178399	0.199618	0.0498205	0.0763631	-0.210355	0.156006	0.756137	-0.109049	-0.0558098	0.151272	-0.0818808	-1.90405	-0.174658	0.50611	0.239782	-0.374156	-0.323181	0.332079	-0.565715	-0.255176	0.203384	0.0944839	0.454652	0.179809	0.355372	0.212579	-0.12087	0.249408	0.525311	0.219143	-0.158398	-0.125316	-0.713654	-0.148333	-0.0343625	0.487706	-0.0584452	0.113575	0.407079	0.167105	0.201508	-0.47801	-0.0319709	-0.0445492	0.190567
chr1_5703503_5753837	0.151108	0.239922	-0.288457	-0.0968643	0.148927	0.442152	0.0323504	0.27583	-0.0485448	-0.110504	-0.361132	-0.284138	-0.197005	-0.099705	-0.0403877	0.0345816	0.47801	-0.312924	0.252858	-0.0379413	-0.145904	0.082514	-0.223406	-0.571812	0.323484	0.00143968	-0.121655	-0.0844774	-0.108289	0.281623	0.0727715	0.203148	0.220854	0.222161	0.102593	-0.142042	-0.538527	-0.382644	-0.350965	0.124223	-0.0302376	0.196794	0.00551673	0.163782	0.119978	-0.219288	-0.443475	0.219899	-0.252997
chr1_5753837_5804550	-0.0567739	0.0233045	0.286523	-0.221088	0.252749	-0.380686	-0.120632	-0.327029	-0.515792	-0.0973132	-0.217475	-0.154972	-0.430139	-0.157236	-0.215341	-1.33838	-0.0957288	-0.178727	0.134563	-1.18544	0.186799	-0.137983	-0.206243	-0.727589	0.221117	-0.0644925	-0.0335581	0.163584	0.00729889	0.264589	0.485599	-0.0939222	0.137241	-0.207956	-0.134913	0.067812	-1.36156	-0.272854	-0.179813	-0.318328	0.0909099	0.0482489	-0.192756	-0.622274	-0.354906	-0.68809	-0.487172	0.0898626	0.0363122
chr1_5804550_5855184	0.0525421	0.103354	0.346313	-0.318053	0.430443	-0.277145	-0.23582	0.267141	-0.542177	-0.150956	0.217763	-0.170242	0.0169983	0.178378	0.209978	-1.66357	-0.340443	0.0600077	0.0993342	-0.544247	0.0982802	-0.34795	-0.697405	-0.445544	0.242903	-0.0778618	-0.306823	0.02185	0.414317	0.268392	-0.154503	0.135891	0.282023	0.189079	-0.142377	-0.116978	-1.26763	-0.37866	-0.0201529	-0.348804	-0.206164	0.0708805	0.308673	0.189897	-0.229775	-0.516297	-0.312678	-0.096836	-0.295855
chr1_5855184_5906107	0.0273502	0.17273	0.383137	-0.296194	0.0379251	-0.439788	0.295403	0.339777	-0.469208	-0.380807	0.0894743	-0.227613	-0.115783	-0.156812	-0.142891	-0.605869	-0.234317	-0.262198	0.157862	-0.735293	-0.899736	-0.053023	-0.419715	-0.501446	0.195762	0.120985	-0.138827	-0.0164248	0.294814	0.529221	0.0734534	0.029804	0.111548	0.356823	-0.22619	0.152466	-1.45057	-0.369141	0.0570794	-0.574048	-0.0859316	0.16011	0.267172	-0.0609517	-0.130016	-0.213115	-0.400166	0.0334922	-0.0190006
chr1_5906107_5956239	0.267535	0.573993	0.926194	0.559916	0.559812	-0.0838652	0.161913	0.28595	-0.199486	-0.148759	0.928332	0.10793	0.31212	0.28766	0.452161	0.110427	0.608987	0.98428	0.394103	-0.460649	0.545005	0.662316	0.196609	0.312383	0.864704	0.125053	0.790504	1.03532	0.457872	0.666225	0.412137	0.282484	0.466026	0.319137	0.344011	0.151877	0.317427	-0.37381	0.362237	0.700251	0.670545	0.317677	0.483967	-0.278743	0.175554	-0.467151	0.0947282	0.170388	-0.0752829
chr1_5956239_6006374	0.0288395	0.329441	0.843736	0.27311	0.277675	0.211508	0.307418	0.200637	-0.128028	0.179284	1.63387	0.0379363	0.236213	0.325535	0.624832	0.496313	0.435111	1.55618	0.378513	-0.73972	-0.00141626	0.94669	-0.250426	-0.218231	0.868517	0.148865	0.735494	1.57398	0.248095	0.293794	0.356438	0.262625	0.2991	0.102588	0.0113245	0.302911	0.081423	-0.235054	0.00857197	0.455267	0.459315	0.185889	0.428877	-0.0431189	0.0661974	-0.238652	-0.0372562	0.168955	0.244865
chr1_6006374_6056399	0.286495	0.323043	0.774535	0.164368	0.373592	0.507004	0.109965	-0.0507561	0.0854495	0.748344	0.592951	0.0223021	-0.247462	0.141387	0.0625483	-0.14269	0.353746	0.827111	0.203926	-0.351049	0.142662	0.436689	-0.30514	-0.377146	0.59417	0.0764281	0.280375	0.83999	0.347372	0.125823	0.347271	0.361502	0.289768	0.00629585	0.0973293	0.227495	-0.49263	0.163033	0.471212	-0.0125305	0.203119	0.353048	0.11696	-0.306716	0.192329	-0.228697	-0.0998671	0.341989	0.173321
chr1_6056399_6106547	-0.0441948	-0.187209	0.143293	-0.39929	0.235032	-0.624076	-0.119558	-0.534173	-0.337388	-1.02226	0.146687	-0.318719	-0.276352	-0.0615506	-0.122829	-0.362824	0.00241106	0.130688	-0.0472842	-0.830765	0.0273286	0.192922	-0.679482	-0.454905	0.154042	-0.164085	0.0324428	0.126411	-0.00151155	0.177795	0.0666072	-0.251131	-0.102259	-0.0579786	-0.14693	0.0558187	-0.882374	-0.565822	-0.0359532	-0.472419	-0.20021	-0.173907	-0.091878	-0.767831	0.08188	-0.694975	-0.474136	-0.451725	0.117843
chr1_6106547_6156641	0.305079	0.0801728	0.390675	0.404819	0.332604	-0.0574057	0.0845609	0.105828	0.0375587	0.181468	0.737579	0.0639553	0.228819	0.277585	0.396735	0.309857	0.38684	0.719779	0.392541	-0.311018	-0.483084	0.56783	0.255468	-0.264793	0.582094	0.241429	0.454686	0.791167	0.304952	0.509142	0.323262	0.295189	0.35649	0.32922	0.165083	0.219919	-0.215778	0.0922753	0.0899199	0.299315	0.344993	0.287193	0.522188	0.00948428	0.366404	-0.233485	-0.195201	0.514567	0.170102
chr1_6156641_6206739	-0.095431	-0.293931	0.120097	0.239339	-0.19927	-0.107199	-0.0349495	-0.696405	-0.867641	-0.295793	0.225887	-0.379623	-0.355067	-0.217512	0.159521	-0.527346	-0.0703228	0.270003	-0.208609	-0.615497	-0.413813	0.330113	-0.683688	-0.234554	-0.000772469	0.00610003	0.35438	0.0997868	-0.450349	0.0486491	-0.299222	-0.163927	-0.246921	-0.117087	-0.132595	-0.091003	-0.266561	-0.345104	-0.328616	0.056532	-0.0585435	-0.283385	-0.190276	-0.376128	-0.458586	-0.707229	-0.526363	-0.176084	0.072206
chr1_6206739_6257518	-0.228798	-0.00604748	-0.205339	-0.436811	-0.0560381	-0.306912	-0.291555	0.279645	-0.741767	0.17971	-0.319504	-0.808476	-0.46902	-0.346518	-0.300239	-0.279543	-0.300549	-0.184986	-0.505531	-0.618549	-0.354842	-0.310191	-0.37451	-0.63414	-0.226103	-0.0510638	-0.286802	-0.023081	0.0108388	0.0127123	0.122755	-0.0283845	-0.320097	-0.297129	-0.181838	-0.244471	-1.3336	0.0964009	-0.315213	-0.669186	-0.266214	-0.253886	-0.0246743	0.448802	-0.129307	-0.559252	-0.633819	-0.103401	-0.146199
chr1_6257518_6307940	-0.333685	-0.0663989	0.0148855	0.342529	-0.0672147	1.18226	-0.0621015	1.04031	-0.637459	0.985811	-0.768617	-0.77715	-0.83792	0.495879	0.0371056	1.05409	0.0906659	-0.355409	-0.00878667	0.695027	-0.491671	-0.334468	0.293829	-0.622292	-0.575887	0.484005	-0.17658	-0.390669	0.0115397	-0.0575213	0.484362	0.128361	-0.283132	-0.21616	-0.114541	-0.280693	0.0141785	1.40895	-0.208904	0.0826598	-0.228535	0.159103	0.102328	0.586725	0.0135663	0.19728	-0.42671	0.286313	-0.387275
chr1_6307940_6358019	0.508231	0.295633	0.35857	-0.00715864	0.323917	-0.452157	-0.161666	0.875653	-0.198763	0.289495	0.514272	0.183279	0.228312	0.0561777	0.303044	-0.283466	0.113388	0.556541	-0.00899908	-0.517654	-0.309434	0.362001	-0.377827	-0.182698	0.485663	0.0653635	0.363708	0.680697	0.285906	0.303958	0.414622	0.129053	0.242334	0.258403	0.103339	0.552988	-0.292424	-0.00851872	-0.137828	0.0402879	0.139984	0.266277	0.467067	0.136784	0.722461	-0.465762	-0.0651746	0.421788	0.0105999
chr1_6358019_6409166	-0.0431581	-0.169443	-0.142173	-0.890889	0.318385	-1.15767	-0.0424943	-0.376685	-0.316466	-0.615344	0.107017	-0.0281966	-0.54703	-0.385701	-0.0151414	-2.10975	-0.381163	0.233703	-0.0664964	-1.45411	-0.136982	-0.371089	-0.551076	-0.852607	0.0294162	-0.21735	-0.204771	0.196178	-0.0997412	0.112495	-0.280813	-0.271556	-0.131985	0.215289	-0.350125	0.244747	-1.88574	-1.11003	-0.0936689	-0.885677	-0.107399	-0.00727103	0.131155	-0.000923285	0.262337	-0.852663	-0.467593	-0.173833	-0.416423
chr1_6409166_6459983	-0.0302972	-0.141751	0.284456	0.189687	0.0502214	-0.241185	-0.244668	0.33302	-0.721404	0.0188681	0.0471803	-0.401948	-0.324926	-0.143772	-0.168167	0.155179	-0.67295	0.262109	0.00857786	-0.349307	-0.728247	-0.290565	0.0681565	-0.972141	-0.316747	-0.123639	0.0910029	0.299711	-0.322043	-0.385567	0.298265	-0.32034	-0.158174	-0.364639	-0.378265	0.157963	-0.935455	0.193553	-0.602609	-0.287589	-0.319773	-0.17722	-0.237623	-0.0772553	0.158888	-0.690379	-0.741943	-0.0535172	-0.234432
chr1_6459983_6510337	-0.469223	-0.413829	-1.02103	-0.22352	-0.247402	0.421233	-0.398411	0.842751	-0.66636	0.492678	-0.679093	-0.890165	-0.946498	-0.126369	-0.555615	0.444347	-0.476218	-0.782974	-0.528725	0.421965	-0.695748	-0.974778	-0.245428	-1.12747	-0.798815	-0.281692	-0.600087	-0.745991	0.0127837	-0.291991	0.0052697	-0.186328	-0.349286	-0.475407	-0.404751	-0.071832	-0.745654	0.730648	-0.695163	-0.61732	-0.982608	-0.00947641	-0.373511	0.326321	-0.22023	-0.444029	-0.756288	-0.356089	-0.687347
chr1_6510337_6560503	-0.313193	-0.0220988	-0.316734	-0.12104	-0.0761645	0.38527	-0.240683	0.787098	-0.837331	0.555476	-0.472662	-0.756527	-0.426585	0.180041	-0.460958	0.242061	-0.138699	-0.226277	-0.0860465	0.433091	0.208791	-0.380811	-0.355703	-0.58454	-0.337155	0.235188	-0.440965	-0.441433	-0.0173478	0.246493	0.445505	0.0822134	-0.0234469	-0.150863	-0.184138	0.278682	-0.765746	0.752794	-0.170554	-0.318887	-0.368127	0.225985	-0.0416639	0.295601	0.22321	-0.0869375	-0.714489	-0.119799	-0.071322
chr1_6560503_6610963	-0.362395	-0.157387	-0.438377	0.662688	-0.325091	-0.0251862	-0.179814	-0.612355	-0.694507	0.0531072	0.176661	-0.774341	-0.503085	-0.0992325	0.37248	0.350275	0.0677808	0.638584	-0.112073	-0.325684	-1.43931	0.486103	-0.170584	-0.217969	-0.265381	-0.0752868	0.513348	0.34737	-0.0413685	-0.192991	-0.303709	-0.306275	-0.202112	-0.479801	-0.218522	-0.435785	0.89082	0.583629	-0.375673	0.861193	0.158313	-0.322817	-0.318187	-0.392265	-0.0962339	-0.324614	-0.75446	-0.121651	-0.424659
chr1_6610963_6661573	-0.318805	-0.231178	0.0621448	0.120409	0.215946	0.342294	-0.315464	-0.384205	-0.587516	-0.0481393	-0.301557	-0.550875	-0.478768	-0.0148754	-0.038519	-0.0122157	-0.4531	0.0863066	0.00898753	-0.178429	-0.0799551	-0.117135	-0.526784	-0.512425	-0.214017	-0.101362	-0.210742	0.13354	-0.194134	-0.187982	-0.229643	-0.0945235	-0.286099	-0.213325	-0.365931	-0.0627518	-0.332293	-0.112976	-0.155317	0.0641872	0.0959256	-0.208498	-0.365597	0.251263	-0.1096	-0.41567	-0.402818	0.0287759	-0.176722
chr1_6661573_6711804	-0.192388	-0.313151	-0.606213	0.284304	-0.274829	0.986959	-0.375904	0.808674	-0.778775	0.753034	-0.0854136	-0.568037	-0.875663	0.240709	-0.132487	0.738566	-0.269601	-0.308402	-0.0973085	0.252265	-0.723489	-0.485211	0.040366	-0.793178	-0.465772	0.0211348	-0.387125	-0.363737	0.0433563	-0.136272	0.393961	-0.283653	-0.241094	-0.336697	-0.387505	-0.175561	-0.33993	0.926025	-0.39624	-0.0756718	-0.539651	-0.122078	-0.581837	0.458022	-0.231674	-0.366693	-0.536282	-0.446	-0.406203
chr1_6711804_6762267	-0.179361	-0.372269	-0.418723	-0.4806	0.0137677	-0.964213	-0.494401	-0.306321	-0.632383	-0.275615	-0.0119103	-0.587146	-0.72328	-0.316232	-0.25951	-0.247405	0.192793	-0.596391	-0.345227	-1.19474	-1.20572	0.266284	-0.334728	-0.985425	-0.646097	-0.0210138	0.169861	0.00973738	-0.0699052	-0.417153	-0.856441	-0.377037	0.130165	-0.341372	-0.437988	0.173161	-1.06514	-0.452941	-0.275264	-0.426146	-0.425266	-0.12455	0.00113802	-1.0302	-0.482519	-0.904813	-0.616666	-0.440278	-0.259009
chr1_6762267_6813170	-0.0129009	0.166786	-0.371865	-0.142273	-0.0644583	-0.230201	-0.202678	-0.257419	-0.611722	0.151318	-0.393491	-0.735215	-0.716961	-0.439253	0.0089798	-0.32822	-0.136852	0.105141	-0.172196	-0.846405	-0.817594	-0.301385	-0.454257	-0.72804	-0.366695	0.0591055	-0.1674	-0.0725864	-0.151934	-0.155292	0.188346	-0.21849	-0.270429	-0.362592	-0.58358	-0.229025	-1.11783	0.483501	-0.537439	-0.274251	-0.319928	-0.154614	-0.0812228	0.605453	-0.0844881	-0.743128	-0.955172	-0.0359828	-0.296267
chr1_6813170_6863836	-0.39055	-0.313092	-0.309267	0.304412	-0.191306	0.348646	-0.1817	-0.823672	-1.21172	0.0750638	0.239729	-0.608859	-0.676303	-0.0737312	-0.0426296	0.399169	-0.541715	0.17171	-0.505807	-0.164762	-0.726081	0.18538	-0.138329	-0.717497	-0.829418	-0.286139	-0.127513	-0.346916	-0.709724	-0.281759	0.269818	-0.38724	-0.256517	-0.316956	-0.340196	-0.142559	-0.609572	0.652084	-0.469577	0.382995	-0.72969	-0.285021	-0.276979	-0.0366962	-0.463582	-0.570976	-1.11682	-0.196726	-0.3305
chr1_6863836_6913990	-0.166668	-0.0992966	-0.502337	-0.575423	-0.123805	-1.27028	0.025651	-0.685953	-0.70504	0.129723	-0.343454	-0.776168	-0.814046	-0.052535	-0.154002	-0.510415	0.104367	-0.186186	-0.0958504	-1.50721	-1.23219	-0.544805	-0.227801	-1.12558	-0.594221	-0.376644	-0.612239	0.210341	-0.11836	0.0740894	0.0444336	-0.128726	-0.00885004	-0.0696001	-0.482012	-0.0362373	-1.24957	-0.111854	-0.0104233	-0.408088	0.0139236	-0.271528	-0.359015	-0.0593499	0.0947438	-0.797869	-0.865174	-0.279591	0.183068
chr1_6913990_6964080	-0.00180632	0.254869	-0.75577	-0.555638	0.380601	0.208389	-0.210954	0.264363	-0.276472	-0.102254	0.0188074	-0.377932	-0.266398	0.205524	-0.00795114	0.0290479	0.518284	0.136413	0.332356	-0.562521	-1.02816	0.234043	-0.343823	-0.617768	0.0726636	0.174172	-0.407494	-0.313029	0.335934	0.119229	0.0132201	0.233878	0.214493	0.296419	-0.00365632	-0.11641	-0.837846	0.0614513	0.394578	-0.0912332	-0.397604	0.0303053	0.0667649	0.569853	0.327957	-0.300978	-0.842828	0.313127	-0.193669
chr1_6964080_7014218	-0.0824089	0.226576	-0.87019	0.0663092	-0.0389344	-0.34292	0.0628909	0.40053	-0.580785	-0.441622	0.3458	-0.437559	-0.308669	-0.181375	-0.0654217	-0.516552	0.249606	0.369239	-0.205202	-0.706869	-0.44216	-0.128411	-0.436758	-0.374939	0.2258	-0.141148	0.00561847	-0.134956	0.0181688	0.170429	-0.581419	0.0332301	-0.214373	0.0747985	-0.410495	-0.251037	-0.976775	0.104396	-0.334429	0.113572	0.180751	-0.0130216	0.243663	-0.187863	0.130775	-0.604476	-0.692118	-0.0703523	-0.142616
chr1_7014218_7064319	0.0342292	0.342945	0.0510734	0.530169	0.266262	0.273493	0.173752	-0.158382	-0.344369	0.0883934	0.108988	-0.315987	-0.351065	-0.0371873	0.0634058	0.296689	-0.0562838	0.067268	0.191298	-0.851588	-0.0940988	0.291112	-0.235174	-0.352536	0.369819	0.0940183	0.249798	0.52529	-0.0426106	0.343051	0.00734273	0.017634	0.0170552	0.191193	-0.055584	-0.390334	-0.183002	-0.0519643	0.0140399	0.311552	0.0621498	0.153236	-0.20805	-0.0938025	-0.0818139	-0.333218	-0.189968	0.0474007	0.035311
chr1_7064319_7114400	-0.1688	-0.094664	0.598039	-0.385872	0.0811457	-0.529479	0.00834226	-0.399532	-0.343872	-0.214521	0.375568	-0.914655	-0.209776	-0.494829	-0.0413781	-1.35694	-0.134547	0.559583	-0.0245137	-0.782281	-0.376982	-0.424033	-0.618778	-0.426624	0.184014	-0.360259	0.0726874	0.688328	0.0140462	-0.184316	0.37602	-0.0147102	-0.021983	-0.162774	-0.245561	-0.315006	-1.28285	-0.392899	-0.20103	0.217212	-0.240156	-0.0997442	0.202468	0.158373	-0.335063	-0.408258	-0.460246	-0.317527	-0.31893
chr1_7114400_7164407	0.171274	0.118419	-0.449806	-0.0576525	0.257362	-0.300024	0.0914086	0.46028	-0.513125	0.0528059	0.191992	-0.0109658	-0.283654	-0.0121912	0.0943111	-0.325494	0.173071	-0.146692	0.250714	-0.59116	-0.313993	0.264503	-0.304319	-0.397858	0.306491	-0.0425809	0.160346	0.27544	0.190039	0.119561	-0.291976	0.219545	0.100286	0.0998708	-0.207151	-0.00295034	-0.874769	-0.217337	-0.268984	-0.16918	0.40388	0.169235	0.0648135	-0.156706	-0.145038	-0.390024	-0.345665	-0.0226597	0.0403599
chr1_7164407_7214608	0.150821	-0.109954	-0.140421	-0.35111	0.272901	-0.168348	-0.119637	0.233526	-0.379126	-0.357007	0.328471	-0.247323	-0.261035	0.0336043	-0.0764644	-0.816413	0.0699733	-0.254565	-0.43846	-0.638787	-0.501984	-0.104979	-0.0135457	-0.425294	0.0888883	0.120545	-0.195604	-0.268914	0.327936	0.20013	-0.19917	0.157256	0.226155	0.292719	-0.0569732	-0.041857	-1.1781	-0.497967	0.01087	-0.715607	0.267995	0.125218	-0.0417834	0.445707	-0.0815191	-0.37782	-0.148268	0.0962495	-0.328102
chr1_7214608_7264812	0.0403765	0.378532	0.501522	-0.00574238	0.0506964	-0.328025	-0.219893	-0.276342	-0.548568	-0.0194551	0.904285	-0.513517	0.128534	0.0245248	0.0639823	0.0889979	0.0196581	0.169598	0.365474	-0.705797	-0.282082	-0.128861	-0.681492	-0.408571	0.318233	-0.0978931	-0.0452035	0.72131	-0.110534	0.334103	-0.2247	0.0593808	0.0871991	-0.0758235	-0.14856	-0.224719	-1.05297	-0.0344234	0.104085	-0.561126	-0.353085	-0.0899636	0.125128	-0.230491	-0.300117	-0.434542	-0.700458	-0.167062	0.0146321
chr1_7264812_7315831	-0.165641	0.0851334	0.562576	-0.512864	0.195107	-0.514411	-0.21155	0.221531	-0.499553	-0.0955887	0.82929	-0.2195	-0.545827	-0.127169	-0.0411922	-1.35272	-0.0376224	0.0988441	0.00927582	-0.728584	-0.894032	-0.0207145	-0.460616	-0.573518	0.151587	-0.245946	0.0848679	0.447595	0.0731459	-0.378459	-0.327478	0.0887917	-0.147798	-0.0551858	-0.319149	-0.199415	-1.04127	-0.680603	-0.202577	-0.0378722	0.177653	0.00428211	0.116556	0.329787	-0.322256	-0.543665	-0.586337	0.0608793	0.214862
chr1_7315831_7365921	0.211316	0.192695	0.0801976	0.127768	0.306112	-0.122324	0.251797	-0.169316	-0.342249	-0.261803	0.143913	0.0550179	-0.0536423	-0.0451039	0.147238	-0.297252	0.341699	0.0886173	0.173532	-0.52989	0.0669555	-0.161632	-1.02384	-0.239499	0.274691	-0.178446	0.105934	0.0837413	0.255076	-0.243164	0.102927	0.265025	0.360549	0.202965	-0.129005	0.450101	-0.840981	-0.196614	-0.178598	-0.405742	0.0486973	0.270692	0.162778	0.25762	0.345589	-0.449875	-0.107544	0.243211	-0.158882
chr1_7365921_7416120	0.288789	0.14895	-0.0440981	0.114378	0.454405	0.188269	0.197641	0.260845	-0.128678	-0.0430015	-0.593521	-0.0650801	-0.230647	0.0144345	0.252503	-0.294144	0.229737	-0.458387	0.397179	-0.662684	0.270139	-0.0710048	-0.719997	-0.421178	0.251448	0.22131	0.0442307	0.339237	0.257944	0.617134	0.453618	0.117614	0.0439545	0.245898	0.0754557	0.707322	-1.05233	0.0375413	-0.134672	-0.274214	0.533528	0.113554	0.193735	0.20832	0.509103	-0.19515	-0.384357	-0.0547823	0.132592
chr1_7416120_7466721	0.333242	0.349972	0.240006	-0.228314	0.290486	0.301119	0.0941974	0.227837	-0.092569	0.225761	0.503501	-0.0438101	-0.35202	0.131914	0.0781023	-0.530252	0.260421	0.132419	0.0907304	-0.472217	0.146803	0.429441	-0.371619	-0.251696	0.414039	0.177711	0.303075	0.0534912	0.0256538	0.317521	0.638186	-0.0191199	0.200821	0.23103	0.0737786	0.204672	-1.08506	-0.262766	0.213122	-0.0489485	0.480599	0.203904	0.151043	0.484835	-0.198062	-0.383753	-0.432614	0.088728	0.102454
chr1_7466721_7519764	-0.0493586	0.144761	0.811133	-0.786552	0.248183	-0.638351	-0.121478	-0.248403	-0.33285	-0.47373	0.414688	-0.272636	-0.259264	-0.278369	-0.13745	-1.40861	-0.467611	0.296017	0.0986094	-1.01047	-0.723161	-0.335427	-1.14383	-0.630313	0.493644	-0.000117964	0.0246512	0.481226	0.123196	0.0495371	-0.290042	-0.11462	-0.245746	0.14015	-0.0396486	-0.125629	-1.35339	-0.564675	-0.216286	-0.752209	0.160557	0.00455152	0.454407	-0.171545	-0.27536	-0.411811	-0.40528	0.0593761	-0.0776428
chr1_7519764_7569827	0.219345	0.325127	0.662186	-0.201362	0.614284	-0.903499	0.0439717	-0.102021	-0.0067643	-0.720085	0.692281	0.00713824	-0.0502208	-0.11162	-0.00219283	-1.71729	-0.114043	0.372371	0.0547794	-0.765125	0.242425	0.322925	-1.29825	0.0292236	0.683102	0.169286	0.1114	0.413508	0.0691249	0.124943	0.30431	0.108235	0.129166	0.420798	-0.0808734	0.32854	-0.851116	-1.14368	-0.328687	-0.472	0.670625	0.399243	0.461673	0.0437482	0.452646	-0.663146	-0.68055	0.113702	0.113603
chr1_7569827_7619947	-0.0273962	0.22237	0.54037	0.0482199	0.176278	-0.040251	0.259594	0.216497	-0.162053	-0.223274	0.306621	-0.213992	-0.348715	-0.231069	0.313378	-0.489931	0.261409	0.291314	-0.0594955	-0.926879	-0.315507	0.154018	-0.264969	-0.224496	0.333847	0.273927	0.0770798	0.336552	0.17118	0.407592	-0.244967	0.0582827	-0.206143	0.129153	0.0579373	0.0720901	-0.427535	-0.531139	0.0894818	0.338825	0.18952	0.105975	0.102156	-0.00346797	-0.0464458	-0.349273	-0.689126	0.121932	0.04901
chr1_7619947_7672670	0.0430276	-0.0699555	0.131265	-0.75284	0.174886	-1.07356	0.0402347	0.125164	-0.394005	-0.516824	0.0266941	-0.149389	-0.0422337	-0.123283	-0.0862472	-1.38039	-0.274409	0.131792	0.0544471	-1.12646	-0.577083	-0.0231924	-0.730078	-0.832343	0.269902	0.156549	-0.00739245	0.0595073	0.0150049	-0.0800896	-0.314078	0.0261442	-0.240581	-0.0443021	-0.215948	-0.135394	-1.57051	-0.674364	-0.114122	-1.36943	0.337125	0.113388	0.100743	-0.275634	-0.185568	-0.650911	-0.272021	0.0684163	-0.258783
chr1_7672670_7722764	-0.0597006	-0.288678	0.397683	-0.063016	0.108803	0.272819	-0.114604	-0.210143	-0.538967	-0.868474	0.255403	-0.518004	-0.551436	-0.102126	-0.0594775	-0.689582	-0.125595	0.0681862	-0.167957	-1.31381	-0.185177	0.00905694	-0.746354	-0.507216	0.238045	-0.582276	0.10636	-0.00159808	-0.0878204	0.363536	-0.478726	0.0418409	0.0256684	-0.0178666	-0.112595	-0.0787838	-0.657615	-0.996077	-0.0845091	-0.0949736	-0.231173	0.138496	0.194791	-0.749005	-0.080429	-0.72964	-0.662677	-0.48426	0.18765
chr1_7722764_7772799	-0.16978	-0.100835	-0.415874	0.121186	-0.177616	-0.171326	-0.489253	0.676562	-0.663403	0.0531919	-0.35311	-0.340298	-0.671741	-0.000741749	-0.0838385	0.091601	-0.0693835	-0.306107	0.15004	0.0188891	-0.0803593	-0.426818	-0.301262	-0.713571	-0.37663	0.164369	-0.326313	-0.346668	-0.154235	0.130654	-0.316786	-0.086682	-0.371115	-0.111091	-0.356606	-0.0626254	-0.450878	0.461603	-0.279133	-0.332729	-0.409171	-0.0198623	-0.221631	-0.405475	-0.196639	-0.412551	-0.379206	-0.241979	0.0806668
chr1_7772799_7823069	-0.102314	-0.207425	0.465525	-0.342477	0.0650806	-0.111136	-0.150105	-0.0483743	-0.404335	-0.171746	0.421622	-0.548846	-0.54822	-0.0680197	-0.152126	-0.406893	-0.152829	-0.111944	-0.0698909	-0.555116	-0.544129	0.206478	-0.260354	-0.463511	-0.263941	0.0218935	0.146432	0.160293	-0.248285	-0.00839023	-0.0273448	-0.0175848	0.217339	-0.00964388	-0.367414	-0.0944839	-1.17255	-0.0598889	-0.431318	-0.387516	-0.0224229	-0.0176148	0.129886	-0.574077	-0.180376	-0.547076	-0.489393	-0.356466	-0.268636
chr1_7823069_7873283	-0.0535167	0.313575	0.709029	0.56986	0.106306	0.541489	-0.0273363	-0.343777	-0.680252	0.296519	0.957438	-0.428288	-0.311243	0.139748	0.13096	0.909206	0.313161	0.427067	0.132897	-0.691412	-0.164419	0.241823	-0.113818	-0.428755	0.0256808	0.261669	0.503579	0.645791	0.294801	0.194176	-0.252169	0.22411	0.138941	-0.151001	-0.167191	0.0943043	0.156024	0.0485223	-0.36251	0.890613	-0.19905	-0.107225	0.18028	0.289125	-0.0295858	-0.954737	-0.608761	0.0388789	0.193513
chr1_7873283_7923616	0.0997146	-0.153111	0.645879	0.638548	0.0978151	-0.07489	-0.282318	0.0251706	-0.615978	0.455987	0.774821	-0.348845	-0.292933	0.189985	0.109133	0.896651	0.202027	0.499963	0.0826757	-0.0637405	-1.03	-0.253257	0.29312	-0.438634	-0.172116	-0.244774	0.187362	1.19617	-0.137986	-0.247894	-0.328509	-0.00815774	0.0201755	-0.115069	-0.270402	-0.0853981	0.0838327	0.451144	-0.187329	0.85113	-0.130241	-0.185421	-0.472893	-0.489404	-0.480296	-0.127427	-0.651653	0.0596511	0.07384
chr1_7923616_7973865	-0.0600349	0.181852	0.789092	-0.264489	-0.230946	0.0260446	0.0422071	-0.178631	-0.29009	0.0192503	0.744154	-0.261331	-0.127294	-0.046591	0.0926749	-0.813167	0.195602	0.497706	0.0056945	-0.53649	-0.499806	-0.135947	0.0735221	-0.403647	-0.0556915	-0.173024	0.562142	0.596319	0.152522	0.126861	-0.0254111	-0.147169	-0.0026207	0.129381	-0.27924	0.0590564	-0.0802842	-0.179073	-0.222344	-0.0634511	-0.107675	-0.166167	-0.0939166	0.494757	0.0350487	-0.348849	-0.37071	-0.0460619	-0.294195
chr1_7973865_8024663	-0.0725986	0.185063	0.394988	0.990501	-0.45075	0.883091	0.0217735	-0.575773	-0.606184	0.541074	0.602768	-0.384429	-0.339013	0.28354	0.249001	1.7755	0.457541	0.678709	0.34973	0.31441	-0.436011	0.554349	0.430318	-0.236102	-0.206098	0.216048	-0.128273	1.07374	0.0459046	-0.161113	0.546173	0.0546412	0.145065	-0.0448747	-0.0135045	-0.10945	0.725628	0.95433	-0.0100868	1.12462	0.0695382	-0.119526	-0.390671	-0.357904	-0.147839	-0.238092	-0.164003	-0.262303	0.492314
chr1_8024663_8074961	-0.312646	0.016194	-0.340262	-0.502456	0.0394336	-0.166431	-0.37761	-0.178595	-0.611562	-0.351384	-0.76455	-0.500381	-0.583823	-0.395774	-0.18861	-0.195931	-0.318233	-0.452669	-0.246967	-0.630354	-0.192825	-0.375392	-0.144237	-0.990589	-0.427627	-0.363688	-0.67692	-0.370676	-0.324155	-0.189324	-0.459442	-0.2849	-0.427282	-0.0266944	-0.577597	-0.161965	-0.896252	-0.0137406	-0.056655	-0.906292	-0.33814	-0.143425	-0.257548	-0.363053	0.102159	-0.776312	-0.750933	-0.481283	-0.446536
chr1_8074961_8125282	-0.0270676	0.450576	-0.307	1.01178	0.0686245	0.830157	0.0586651	0.685086	-0.365001	0.731597	-0.345857	-0.488656	-1.18827	0.212622	-0.0532114	1.9914	0.159661	0.602653	0.338675	0.388682	-0.341056	-0.169637	0.592764	-0.344154	-0.342969	0.0322983	0.443919	0.321886	0.0320812	0.121887	0.556127	0.0939107	0.194683	0.0211244	0.000343285	0.711362	0.425949	1.3501	-0.252414	0.975126	-0.00653715	-0.062209	0.123982	0.458368	0.231379	0.0514514	-0.387574	0.0905458	0.265302
chr1_8125282_8175443	-0.0368847	-0.318098	-0.168578	-0.0475224	0.112762	-0.113127	-0.162758	-1.07096e-06	-0.271261	0.228807	-0.238543	-0.306529	-0.477864	-0.345251	-0.435516	0.0413343	0.194328	-0.783412	-0.017558	-0.743084	0.304848	0.301818	-0.127998	-0.788888	-0.324405	0.1292	-0.122993	-0.00766515	0.142783	0.368188	-0.408764	-0.113151	-0.0914219	0.133421	-0.175243	0.838778	-1.2058	-0.226345	-0.150664	-0.295283	-0.518244	0.00224068	-0.275163	0.145402	0.487822	-0.461266	-0.544603	0.221004	-0.118893
chr1_8175443_8225854	0.15896	0.0165906	-0.454321	0.144118	-0.0613145	-0.224429	-0.0223103	-0.38575	-0.483239	-0.468575	-0.642684	-0.393693	-0.755844	-0.344264	-0.457125	-0.0584252	0.0325795	-1.00521	-0.0735835	-0.380983	-0.386718	-0.282395	-0.197775	-0.552978	-0.454182	0.169032	-0.50644	-0.326291	-0.108097	0.0983629	-0.0935879	-0.168989	-0.147611	-0.186301	-0.461687	0.546242	-1.23638	0.345294	-0.234684	-0.529883	0.243419	0.00992935	0.128594	0.321883	0.262672	-0.820048	-0.539062	-0.265784	0.0997779
chr1_8225854_8276177	0.0128458	0.119196	-0.655006	-0.0543884	-0.0511834	-0.0491517	-0.194315	0.0639822	-0.311435	0.0895959	-0.490803	-0.379112	-0.83489	-0.0499278	-0.0472736	0.292668	-0.487966	-0.508603	-0.221024	-0.782585	0.100375	0.153594	-0.179211	-0.568081	-0.470132	0.0520225	-0.442689	-0.394696	0.00502404	-0.0737638	-0.222915	-0.109181	0.0965133	0.14462	-0.276978	0.672145	-0.900683	0.101643	-0.104295	-0.93289	-0.0448916	0.0332631	-0.159476	0.0794027	0.264556	-0.632562	-0.88009	0.0639891	0.184818
chr1_8276177_8326620	-0.277557	-0.316395	-0.98886	-0.498043	-0.226374	-0.511511	-0.54845	-0.401731	-0.932163	-0.254298	-1.35959	-0.759196	-0.985324	-0.31946	-0.656223	-0.416028	-0.433129	-1.70634	-0.277567	-0.811179	-0.374598	-0.610527	-0.431354	-0.862444	-0.909091	-0.372526	-0.695818	-0.583368	-0.609141	-0.746361	-0.602155	-0.428759	-0.460712	-0.318072	-0.409511	0.50165	-1.81516	-0.521245	-0.340244	-0.67297	-0.600883	-0.34946	-0.414232	-0.224688	-0.252574	-0.61966	-0.846154	-0.306429	-0.181173
chr1_8326620_8376835	0.161775	-0.0135418	-0.330711	0.552999	0.239015	-0.0947418	-0.189838	0.111564	-0.223006	-0.183417	-0.0353024	-0.321598	-0.264134	-0.170362	-0.150249	-0.211976	-0.143852	-0.145117	-0.10186	-0.41241	-0.00681142	0.121167	-0.0125802	-0.390367	-0.237759	0.153278	-0.489338	0.0309645	0.208383	0.0773045	-0.170018	0.0603451	-0.196109	0.0631197	-0.352585	0.732151	-1.00039	0.0570273	-0.151835	-0.229069	0.115646	-0.0745327	-0.00213635	-0.307893	0.32551	-0.446846	-0.489987	-0.225714	-0.182116
chr1_8376835_8427216	0.223239	0.290189	0.152236	0.709145	0.202068	0.561198	0.163344	-0.00359572	-0.402588	0.501505	0.507512	-0.353509	0.00575018	0.607846	0.618789	0.686659	0.631041	0.565142	0.442385	0.307593	-0.42604	0.79466	0.559021	0.180562	0.498088	0.279448	0.535795	0.459133	0.0173593	0.364603	0.621397	0.30078	0.232341	-0.0279131	0.306915	0.11193	0.392751	0.827849	0.238362	0.669322	0.611002	0.0291372	0.180543	-0.264676	0.344691	0.0686712	-0.499119	0.111813	0.301752
chr1_8427216_8477505	0.10011	0.0336681	-0.997027	-0.0769944	0.239757	0.539982	0.0765535	-0.278864	-0.483338	0.194592	-0.126616	-0.197043	-0.210714	-0.114857	-0.274851	-0.372375	0.0581534	-0.177649	-0.222102	-0.608209	0.172901	0.166951	-0.150232	-0.657826	-0.0468695	-0.0155692	-0.466653	0.171497	-0.0496863	-0.0551893	0.311097	0.0845899	-0.116299	0.22737	-0.208731	0.270631	-1.28029	-0.294935	-0.194538	-0.271809	-0.0207318	-0.0691357	0.087905	0.138893	0.30114	-0.823166	-0.048386	-0.628646	0.259506
chr1_8477505_8527852	0.097351	-0.0501119	0.145725	-0.0285254	0.0108114	0.443425	0.0598787	0.254612	-0.42307	0.0276969	-0.79872	-0.476578	-0.301091	-0.207732	-0.0126904	0.231607	0.0271246	-0.114012	-0.109959	-0.780753	-0.266413	0.214957	-0.466935	-0.296997	0.333376	-0.0700231	-0.0164112	0.506553	0.0998953	0.428024	-0.201797	0.120581	-0.145132	0.0284974	-0.220402	0.329336	-0.584746	0.198252	-0.189407	0.0107899	-0.186251	-0.0252531	0.0380541	-0.338209	0.355426	-0.504826	-0.414638	0.0673007	0.0978384
chr1_8527852_8579197	-0.201504	-0.0861649	-0.451678	0.201924	-0.394193	-0.328088	-0.249292	0.366001	-0.775645	0.272326	0.239628	-0.547411	-0.483741	-0.370222	-0.233206	0.326437	-0.39947	0.119079	-0.390056	-0.554137	-1.05579	-0.322437	-0.335113	-0.867599	-0.41726	-0.0903148	-0.255757	0.153059	-0.0866157	-0.115952	-0.395662	0.0879244	-0.107294	-0.0569632	-0.361909	-0.0589249	-1.01919	0.378644	-0.173617	0.0852293	-0.601594	-0.129448	-0.157682	-0.0631948	-0.0531362	-0.227749	-0.446681	-0.149115	-0.211344
chr1_8579197_8629534	-0.185049	-0.200079	-1.18474	-0.268545	-0.105017	-0.616687	-0.329677	-0.158285	-0.302972	-0.202577	0.422693	-0.434055	-0.337509	-0.126593	-0.0573608	-0.380068	0.00944047	-0.0706381	-0.265016	-1.32167	-0.160808	0.516811	-0.458583	-0.496708	-0.196168	-0.323601	-0.227414	-0.166435	-0.0661554	0.0835999	-0.46552	-0.155141	0.00123536	-0.252752	-0.263699	-0.30519	-1.1847	-0.389908	-0.278126	-0.182969	-0.223842	-0.286949	-0.195382	0.0208214	0.293419	-0.526335	-0.488562	-0.243363	-0.0744436
chr1_8629534_8680180	-0.0466364	-0.285549	-0.398819	0.120647	0.00192234	0.176783	-0.340139	-0.151767	-0.876944	-0.638809	-0.0370032	-0.346333	-0.73512	-0.180132	-0.169645	-0.0985237	0.221622	-0.228189	-0.273633	-0.621181	-0.799396	-0.408917	-0.15775	-0.521451	-0.69186	-0.551674	-0.248525	-0.419237	-0.479652	-0.125794	-0.31292	0.00811715	-0.0818913	-0.133194	-0.352753	-0.394958	-0.791841	0.251765	-0.51084	-0.410321	0.254793	-0.0950386	0.132304	-0.170573	-0.00532446	-0.57848	-0.637953	-0.38108	-0.158819
chr1_8680180_8730970	-0.250385	-0.0641145	-0.222203	-0.221169	0.229508	-0.139771	-0.187805	-0.655499	-0.532147	-0.200461	-0.343131	-0.0954806	-0.283462	-0.0860204	-0.17713	0.0589807	-0.630757	-0.116786	-0.340458	-0.958899	-0.995033	-0.427102	-0.0625363	-0.188995	-0.206647	-0.0472817	-0.678355	-0.559318	-0.211685	-0.132365	-0.0381815	0.0961362	0.269949	0.104438	-0.466146	0.162023	-0.611065	-0.107958	-0.385877	0.158135	-0.0396755	-0.19007	-0.0355808	-0.18506	0.311155	-0.443714	-0.977579	-0.0468146	-0.0261292
chr1_8730970_8781126	-0.337616	-0.256647	0.242484	0.432137	-0.11522	0.412873	0.0784809	-0.490134	-0.41301	0.52748	-0.253615	-0.0404499	0.449761	-0.0802428	0.0659156	1.22638	-0.306169	0.19986	-0.278641	-0.549005	-0.552916	-0.643249	-0.170421	-1.00109	-0.226299	-0.0415293	0.0641372	-0.32777	-0.23303	-0.100849	0.315517	0.170645	-0.011323	0.272131	-0.225636	0.150875	-0.649157	0.170451	-0.206778	-0.417997	-0.033857	-0.109988	-0.161532	0.557869	0.46121	0.0443841	-0.342402	-0.146236	0.171861
chr1_8781126_8831459	0.102821	0.0187641	-0.234831	0.223925	-0.0307581	0.0552578	0.126644	-0.358761	-0.411071	0.30772	-0.0902895	0.388336	0.20701	0.268196	0.530319	0.864558	0.0863966	0.270244	-0.0271583	-0.338025	-0.899304	-0.435601	0.13297	-0.535543	-0.351191	0.324633	0.0128712	-0.458375	0.271223	-0.0760569	0.44666	0.0684031	0.0457374	0.163002	-0.185582	-0.205529	-0.307066	0.492486	0.21639	-0.059906	-0.0480462	0.0126452	-0.197448	-0.196614	0.315214	0.265295	-0.210859	0.164772	0.158587
chr1_8831459_8881718	-0.350217	-0.447556	-0.141917	0.311905	-0.190659	0.247177	-0.251275	-0.411601	-0.413778	0.543683	0.0513734	0.0174743	-0.137308	-0.103392	-0.347378	0.821452	-0.401279	0.0491764	-0.0141934	-0.257921	-0.472342	0.277362	0.0297674	-0.526361	-0.662291	-0.184817	0.0283316	0.442058	-0.325361	-0.236696	0.259331	-0.210166	-0.376745	-0.140801	-0.447835	-0.250996	-0.349132	0.615877	-0.0754052	0.122718	-0.514127	-0.340932	-0.161333	0.464202	-0.317538	0.0942541	-0.912986	-0.329043	-0.289699
chr1_8881718_8932141	-0.210818	-0.612325	-0.660655	-0.218359	-0.340649	-0.784189	-0.315208	-0.337029	-0.489412	-0.41944	-1.04968	-0.0670699	-0.267698	-0.208137	-0.599705	-1.0067	-0.347428	-0.984407	-0.389947	-1.03608	-0.439426	-0.405182	-0.551085	-1.07314	-0.839556	-0.0247441	-0.842393	-0.400632	-0.24172	-0.488467	-0.0796135	-0.273027	-0.523141	-0.207761	-0.594245	-0.0177995	-1.25984	0.0905654	-0.451649	-0.864372	-0.286648	-0.297135	-0.488004	0.274499	0.0462042	-0.301151	-0.50741	-0.250051	-0.493465
chr1_8932141_8983247	-0.32035	-0.181217	-0.86347	-0.14223	-0.562588	0.357009	-0.272744	-0.00360563	-0.792783	0.150891	-0.532711	-0.23722	-0.25741	-0.494385	-0.331088	0.399725	-0.436331	-0.688851	-0.352362	-0.25007	-0.649962	0.048932	0.13253	-0.975886	-0.598439	-0.44685	-0.592784	-1.02982	-0.424675	-0.554982	-0.534843	-0.141648	-0.185321	-0.400714	-0.449609	-0.242281	-0.696966	0.475678	-0.756196	-0.73148	-0.567854	-0.415484	-0.144434	0.109966	-0.337032	-0.228172	-0.711413	-0.629652	-0.451567
chr1_8983247_9033673	-0.262727	-0.129951	-1.02173	-0.616619	-0.0764117	-0.366432	-0.30117	-0.325902	-0.606525	-0.348675	-1.3424	-0.0741953	-0.250148	-0.462915	-0.376342	-0.099099	-0.399519	-1.08978	-0.548526	-0.761993	-1.30763	-0.456799	-0.54993	-1.00192	-0.944734	-0.0166831	-0.878621	-0.53401	-0.159979	-0.469527	-0.24626	-0.345275	-0.310816	-0.313331	-0.776641	-0.399513	-1.95397	0.299716	-0.550277	-1.44787	-0.17914	-0.397736	-0.400284	-0.36716	-0.0328164	0.0603041	-0.783911	-0.16646	0.307942
chr1_9033673_9083937	-0.0417608	-0.121008	-0.198246	0.478226	0.0932284	0.54324	-0.14857	0.0120277	-0.481847	-0.105573	0.152916	-0.0824299	-0.516197	-0.129279	-0.159817	0.811166	0.0130775	0.136944	0.0743364	-0.30287	-0.899756	-0.0473081	0.245031	-0.705753	-0.356753	-0.223821	-0.207485	0.152468	-0.304588	-0.0379613	0.0227357	-0.0728522	-0.193079	-0.0835892	-0.127309	-0.183897	0.069746	0.401323	-0.285679	0.266683	-0.246752	-0.110765	0.0761028	-0.120046	-0.0721963	-0.0454567	-0.263512	-0.0447755	-0.0855224
chr1_9083937_9134398	0.103182	0.29387	0.518632	0.973493	0.160743	1.11465	-0.0533715	0.275216	-0.424853	1.15893	0.413861	-0.0763373	0.0806337	0.558038	0.426632	1.84501	0.498496	0.806841	0.0174415	0.551916	-0.444703	0.373301	0.735792	-0.195611	-0.218173	0.432197	0.543494	0.674476	0.331885	0.13031	0.325626	0.0722062	0.341495	0.204036	0.13561	-0.0373263	0.963833	1.67923	0.213716	1.20025	0.106807	0.058591	-0.0260634	-0.104477	-0.0211178	0.431132	-0.531164	0.0141001	0.00278034
chr1_9134398_9184944	-0.412124	-0.255036	-0.290854	-0.0958613	-0.241207	-0.28418	-0.487514	-0.10531	-0.833938	-0.654037	-0.00985419	-0.262787	-0.37395	-0.579675	0.014089	-0.00104657	-0.709662	0.053297	-0.286561	-0.677665	-0.726824	-0.502802	-0.696154	-0.704682	-0.285011	-0.149783	-0.375964	0.0852581	-0.724409	-0.145322	0.125823	-0.145754	-0.11361	-0.0832479	-0.346272	-0.223784	-0.453394	-0.367101	-0.787536	-0.470097	0.270178	-0.27989	-0.458366	-0.766846	-0.13372	-0.463617	-0.703133	-0.303181	-0.522353
chr1_9184944_9235171	-0.235098	-0.195303	-0.11361	-0.213227	-0.166183	0.749048	-0.281553	0.467869	-0.715445	0.193325	-0.477924	0.00493933	-0.185785	-0.281749	-0.455889	0.656013	-0.187274	-0.706353	-0.47973	-0.588305	-0.315691	-0.330811	-0.388331	-0.679293	-0.614902	-0.629623	-0.536525	-0.727702	-0.128566	-0.264892	-0.0166053	-0.250467	-0.53352	0.0110676	-0.175862	-0.0341467	-0.875365	0.612768	-0.48442	-0.714322	-0.225935	-0.131586	-0.27488	0.106047	-0.52443	-0.432961	-1.08295	-0.637699	-0.690389
chr1_9235171_9285394	-0.0864926	0.144591	0.167194	0.802325	-0.13312	1.3231	-0.0934895	1.10063	-0.347649	0.952574	-0.12393	0.00572198	-0.14827	0.356127	0.0400755	1.61707	0.140032	0.0261674	0.0986527	0.739705	-0.145771	0.234019	0.66194	-0.548198	-0.070094	0.230445	-0.0333449	0.266728	0.451171	0.262482	0.63094	0.373723	0.0621422	0.111877	0.0944402	-0.174119	0.281513	1.96222	-0.0743256	0.39977	-0.0961429	0.194252	0.104333	-0.0752864	-0.155136	0.461037	-0.161131	-0.0118283	0.0321542
chr1_9285394_9335528	-0.288812	0.129867	0.598185	0.335431	-0.18241	-0.190273	-0.152289	-0.961949	-0.760832	-0.046645	0.52816	0.11547	0.217115	0.0630844	0.300171	0.650581	0.0927396	0.737947	0.276047	-0.330258	-0.145846	0.466518	-0.230554	0.109932	0.344735	-0.0472392	0.515938	0.625536	0.089896	-0.317104	0.026713	-0.0497653	0.12492	-0.105711	0.0882266	-0.205116	0.326643	0.0951133	-0.0620477	0.552261	0.258681	-0.156677	-0.522819	-0.499242	0.040602	-0.361795	-0.316496	-0.285233	-0.213291
chr1_9335528_9385571	0.158597	0.139816	-0.0573597	-0.133452	0.414955	-0.609576	-0.00999017	-0.188191	-0.508146	-0.329712	0.0863448	0.0167871	0.134284	-0.23283	-0.274932	-1.07087	-0.154691	0.13504	0.0593924	-0.519505	-0.194291	0.375915	-0.917131	-0.556764	0.447435	-0.170964	-0.204707	0.298477	-0.133999	0.164419	-0.537434	-0.0047576	0.20622	0.215013	-0.143856	0.217516	-0.925326	-0.819633	0.010749	-0.346493	0.167078	0.147716	0.125466	0.281502	0.380179	-0.225337	-0.347795	-0.0278315	0.143179
chr1_9385571_9435852	0.222697	-0.34889	0.080456	-0.433572	0.205322	-0.334199	0.235843	-0.380049	-0.287554	-0.149657	0.186875	0.455887	0.268086	0.0013742	-0.102457	-1.25461	-0.211669	0.126793	-0.00149547	-0.844307	-0.189692	-0.163353	-0.627294	-0.446559	0.321521	-0.233297	-0.168642	0.219253	-0.0893374	-0.0529973	-0.497239	0.00973827	-0.20608	0.416624	-0.211239	0.0714238	-0.910799	-0.472366	-0.00915836	-0.295195	0.053376	0.0313272	0.491658	-0.00592957	0.166307	-0.320692	-0.261129	0.227466	0.140856
chr1_9435852_9486157	-0.0521611	-0.215936	-0.41199	-0.839535	-0.086107	-1.60552	-0.417978	-0.12213	-0.449386	-1.02861	-0.311972	-0.0765595	-0.142178	-0.561792	-0.418251	-1.25232	-0.538339	-0.0004215	-0.190423	-0.710339	-0.897369	-0.117998	-1.15697	-0.851436	-0.307022	-0.423397	-0.446205	-0.194347	0.0462591	-0.241555	-0.487881	-0.283302	-0.1612	-0.00444597	-0.363169	0.0629786	-1.40123	-0.907771	-0.576641	-1.75455	-0.590326	-0.197856	-0.0861017	0.0405368	0.00657526	-0.357419	-0.635308	-0.132283	-0.267448
chr1_9486157_9536303	-0.0398385	-0.142663	-0.747253	-0.692078	-0.0239335	-0.239877	-0.189439	0.0588723	-0.494334	-0.374156	-0.532726	-0.0958414	-0.0961261	-0.0175941	-0.39487	0.123556	-0.130816	-0.717279	-0.202415	-0.642481	-0.654276	-0.322983	-0.296417	-0.97388	-0.473272	-0.28518	-0.284114	-0.0789167	-0.0360795	0.14908	-0.0651827	-0.100296	-0.212979	-0.150057	-0.618243	-0.199078	-1.06059	-0.0690688	-0.0789511	-0.66076	-0.181789	-0.0516401	-0.542588	0.192099	-0.164053	-0.259424	-0.513425	-0.397953	-0.668982
chr1_9536303_9586995	-0.349836	0.110456	-0.618561	0.102654	-0.151299	-0.0529784	-0.427907	-0.0947086	-0.594319	0.364905	-0.26618	-0.194391	-0.664689	-0.401543	-0.459366	-0.102111	-0.249164	-0.893724	-0.377123	-0.637107	-1.09565	-0.58718	-0.416692	-0.759809	-0.839303	-0.372915	-0.57923	-0.62989	-0.278868	-0.370965	-0.443423	-0.186615	-0.329752	-0.458867	-0.43482	-0.454056	-0.752522	0.5163	-0.609935	-0.221576	-0.59518	-0.389434	-0.0265804	-0.181327	-0.154335	-0.228017	-0.625526	0.0100393	-0.329338
chr1_9586995_9637644	-0.830406	-0.842443	-0.148081	-0.555057	-0.985066	-0.844128	-0.56811	-0.149838	-1.03856	-0.327166	-0.619075	-0.45904	-0.285825	-0.877245	-0.746981	0.163652	-0.634583	-0.889757	-0.849865	-1.32613	-1.45859	-1.35631	-0.702445	-1.61284	-1.39172	-0.478875	-0.774037	-0.763735	-0.660938	-0.758763	-0.504884	-0.910919	-0.528076	-0.534348	-0.868096	-0.489537	-2.02983	0.383956	-1.09537	-0.803987	-0.853841	-0.717287	-0.650457	0.112748	-0.581443	-0.677884	-0.985891	-0.52349	-0.701272
chr1_9637644_9688492	-0.23244	-0.311691	0.457804	0.308284	-0.101637	0.223546	-0.061577	0.859483	-0.742774	-0.252615	0.154434	-0.280721	0.148602	0.0905928	0.270122	0.339338	0.307507	0.247324	-0.21306	0.00972089	-0.0739648	0.191564	-0.3577	-0.341334	0.141459	0.0526115	0.260678	0.334448	-0.092667	-0.0563813	-0.0112326	-0.136148	-0.13589	-0.0866677	-0.168235	-0.111185	-0.0273284	0.200943	-0.19012	0.349095	0.174328	0.0222374	-0.196875	-0.0253259	-0.283118	-0.329195	-0.328879	0.213746	-0.000402509
chr1_9688492_9739358	-0.229801	-0.643311	-0.714457	-0.210716	-0.288383	-0.216772	-0.311902	-0.100253	-0.613918	-0.368973	-1.12192	-0.1229	-0.933381	-0.587069	-0.448982	-0.827969	-0.513338	-1.28167	-0.568119	-1.09393	-0.377334	-0.885885	-0.593573	-1.37226	-0.870367	0.0434745	-1.10341	-1.63633	-0.593162	-0.388851	0.330952	-0.4073	-0.0602169	-0.365394	-0.552208	-0.405256	-1.35077	-0.0933943	-0.575579	-1.34676	-0.726985	-0.33352	-0.498707	0.0409925	-0.433481	-0.384719	-0.650273	-0.809749	-0.263023
chr1_9739358_9789628	0.0914426	-0.126822	-0.342106	0.706173	0.0515066	-0.125867	0.21621	-0.227755	-0.308614	0.0191837	0.0673523	-0.114654	-4.43824e-06	0.0739999	0.357475	0.600591	0.519563	0.257492	0.153637	-0.405837	0.00626852	0.333322	0.303614	-0.321987	-0.241212	-0.160491	0.312734	0.0228937	-0.209105	0.36976	-0.301324	0.0498855	0.0673964	0.0204037	0.157495	-0.255776	0.383349	-0.132176	-0.191501	0.869078	0.179374	-0.0372955	-0.120609	-0.00661218	-0.0431944	-0.023868	-0.413486	0.163005	-0.107896
chr1_9789628_9840083	-0.0102134	-0.247068	1.03498	0.636095	0.21667	0.0548039	-0.123433	-0.0528758	-0.515774	-0.156377	0.846927	0.145662	0.20835	0.0437017	0.471325	-0.180293	-0.131858	0.988191	0.0124837	-0.563855	-0.376217	0.581559	0.0421331	-0.018719	-0.0140793	-0.065393	0.671483	0.625416	-0.138764	-0.268771	0.0107326	-0.0544312	-0.0409363	0.0673289	-0.217188	0.149892	0.537861	0.0848283	-0.0458543	0.607053	0.55015	-0.116903	-0.226713	0.160168	0.0355778	0.0305616	-0.0359951	-0.135519	-0.220679
chr1_9840083_9890716	-0.150241	-0.168414	-0.172102	0.46887	-0.16942	-0.0225157	-0.222518	-0.0428577	-0.733275	0.444361	-0.189852	-0.431995	-0.186593	-0.490605	-0.378572	0.92126	0.226794	-0.143667	-0.13775	-0.167039	-1.10903	-0.529406	0.0359999	-1.07185	-0.751881	-0.0722464	0.083863	-0.330635	-0.100392	-0.641304	-0.0268112	0.0116253	-0.00836567	-0.125489	-0.364357	0.100161	-0.434436	0.780765	-0.402663	0.327738	-0.686751	-0.285049	-0.377547	0.0412204	0.105881	-0.207469	-0.23651	-0.0975954	-0.454753
chr1_9890716_9941091	0.217388	-0.420396	0.27781	-0.356079	-0.253883	-0.953269	-0.0752569	-0.0691729	-0.2895	-0.16761	-0.0341162	-0.185546	-0.0411957	-0.338178	-0.00368817	-1.13463	-0.0432307	0.0676291	0.186091	-1.10379	-0.374984	-0.511421	-0.585914	-0.84714	-0.0796853	-0.14373	-0.0149428	0.111427	0.298544	-0.0104405	-0.222867	-0.00899005	0.106775	0.00626296	-0.26611	0.477592	-1.49422	-0.233195	-0.466438	-0.802506	-0.0407269	0.0182473	-0.159861	-0.0783666	0.102495	-0.328702	-0.530051	-0.157652	-0.4207
chr1_9941091_9991578	-0.498433	-0.655392	-0.312884	0.0128202	-0.362461	-0.0293429	-0.63689	-0.104442	-1.13239	-0.0544086	-0.194146	-0.48938	-0.424209	-0.158862	-0.542229	0.411502	-0.0547359	-0.0267496	-0.367325	-0.278053	-0.652243	-0.382922	-0.320014	-1.31425	-0.686431	-0.0292563	-0.408993	0.0902566	-0.312512	-0.797148	0.0085013	-0.291092	-0.364446	-0.538997	-0.514196	-0.192599	-0.520964	0.458367	-0.57025	-0.233156	-0.298232	-0.489428	-0.642465	0.158178	-0.335065	-0.275084	-0.830766	-0.561484	-0.221792
chr1_9991578_10042519	-0.38407	-0.303488	-0.703376	-0.237197	-0.587488	0.0117001	-0.636139	-0.584273	-0.461108	-0.55366	-0.678222	-0.36988	-0.697883	-0.470326	-0.278351	-0.0429607	-0.132628	-0.0497816	-0.537538	-0.573035	-0.734411	-0.963615	-0.315857	-0.750387	-0.690185	-0.144871	-0.180091	-0.0405503	-0.24662	-0.389437	-0.0464628	-0.278298	-0.259466	-0.342638	-0.347586	-0.1065	-0.726204	0.70504	-0.579428	-0.340309	-0.724338	-0.456204	-0.451398	0.316248	-0.33417	-0.352708	-0.666625	-0.0611776	-0.821324
chr1_10042519_10093756	-0.709945	-0.782688	-0.575848	0.0839577	-0.513158	0.369044	-0.457706	-0.610068	-0.910842	0.461046	-0.441536	-0.50447	-1.1911	-0.446109	-0.311943	0.981439	-0.422375	-0.583686	-0.498826	-0.177372	-0.726237	-0.695633	0.114608	-1.11624	-1.49724	-0.439265	-0.33847	-0.749001	-0.885125	-0.917153	-0.329121	-0.564083	-0.455567	-0.63826	-1.05217	-0.615129	-0.322201	0.704736	-0.973752	-0.335638	-0.483177	-0.651121	-0.715052	-0.559233	-0.573748	-0.251437	-0.733306	-0.269669	-0.371969
chr1_10093756_10144077	-0.147172	0.190738	-0.417169	0.314768	-0.323985	0.0303979	-0.28513	0.298311	-0.537449	0.364201	-0.0902714	-0.159068	-0.537279	-0.164101	-0.347721	-0.406887	-0.604866	-0.190654	-0.0629372	-0.219714	-0.323594	-0.251958	0.231938	-0.562284	-0.620127	0.0186297	-0.151465	-0.325501	-0.340994	0.0480886	0.322443	0.0084486	0.00670708	0.0181805	-0.228824	-0.320283	-0.835295	0.458968	-0.356275	-0.318571	-0.118139	-0.0701593	-0.111279	0.167201	0.191281	0.0471106	-0.461718	0.144414	0.138098
chr1_10144077_10194345	-0.131975	-0.128238	-0.675273	0.0233357	0.232677	-0.334799	-0.01934	-0.221715	-0.57835	0.330118	0.165213	-0.16266	-0.216605	-0.19755	-0.12083	0.421226	0.195377	0.218343	-0.241846	-0.668718	-0.776157	-0.0746532	0.0658875	-0.699384	-0.514802	-0.141038	-0.19516	-0.079234	-0.210482	-0.301357	-0.132315	-0.175886	-0.114761	-0.0062909	-0.152424	-0.427682	-0.14517	-0.109409	-0.200911	-0.030207	-0.0388453	-0.168377	-0.470627	-0.15704	0.173252	-0.0452281	-0.611193	-0.0931296	-0.334668
chr1_10194345_10245093	-0.43356	-0.206539	-0.118811	-0.124272	0.158529	-0.495229	-0.43831	-0.379089	-0.453607	-0.690745	-0.135637	-0.370494	-0.502648	-0.0943631	-0.233678	0.000708271	-0.365354	-0.0353801	-0.228905	-0.525208	-0.330022	-0.228799	-0.0329539	-0.722621	-0.741973	-0.235143	-0.072965	-0.955261	-0.413583	-0.0857252	-0.28755	-0.106231	-0.152009	0.165101	-0.457282	-0.446972	-1.21682	-0.00292896	-0.384976	-0.519795	-0.614296	-0.216273	-0.339885	0.292683	-0.0267562	-0.739297	-0.945828	0.074367	-0.443709
chr1_10245093_10295573	-0.494415	-0.436508	-0.726375	-0.170915	-0.285532	-0.792596	-0.46563	-0.247535	-0.717268	-0.114161	-0.30153	-0.437838	-0.392446	-0.425419	-0.439788	0.370853	-0.541967	-0.181489	-0.462893	-0.323199	-1.73754	-0.345493	-0.179932	-1.01967	-1.04806	-0.0817837	-0.652695	-0.657378	-0.131874	-0.418567	-0.437512	-0.479573	-0.358344	-0.187414	-0.341899	-0.461268	-0.494762	-0.0146216	-0.664621	-0.535189	-0.114298	-0.489126	-0.461891	-0.35352	-0.115441	-0.263662	-1.12219	-0.364656	-0.330624
chr1_10295573_10345887	0.119291	-0.282719	-0.343327	0.335721	-0.222082	-0.174263	-0.0935603	0.506699	-0.296885	-0.322328	-0.479774	-0.110304	-0.574681	-0.254349	0.101834	0.562206	-0.195778	0.0756333	-0.162825	-0.370558	-0.443193	0.0606377	0.34698	-0.672383	-0.438638	-0.0487529	-0.229174	0.176233	-0.281578	-0.0655305	-0.0446238	-0.188571	-0.172856	0.0481109	-0.355257	-0.131795	-0.88415	0.168086	-0.126181	-0.200533	-0.126013	-0.381629	0.0859674	0.405387	0.0952265	-0.120898	-0.479501	-0.0896631	-0.230131
chr1_10345887_10396175	-0.341094	-0.32005	-0.113069	-0.354228	-0.338456	-0.275174	-0.542837	-0.123589	-1.20008	-0.155152	-0.739032	-0.338003	-0.462886	-0.236761	-0.00920802	-0.373214	-0.328278	-0.730856	-0.55446	-0.863641	-1.22705	-0.603199	-1.20962	-0.857194	-0.423302	-0.185331	-0.437145	-0.71318	-0.157196	-0.173692	-0.356938	-0.274855	-0.313513	-0.556985	-0.479539	-0.147228	-1.04711	-0.139693	0.0701186	-0.461383	-0.42052	-0.164906	-0.319365	-0.130764	-0.10138	-0.257473	-0.859723	-0.430003	-0.277509
chr1_10396175_10446829	-0.274731	-0.504381	-0.0453576	-0.366301	-0.271777	-0.609886	-0.370095	-0.294662	-0.786529	-0.571362	-0.556087	-0.430766	-0.591662	-0.316239	-0.137167	0.192678	-0.13466	-0.398604	-0.460151	-0.919401	-0.892223	-0.493425	-0.446983	-1.11202	-0.623681	-0.547128	-0.639477	-0.751453	-0.420012	-1.19048	-1.38433	-0.423466	-0.422455	-0.218087	-0.470159	-0.280272	-0.84675	-0.0278653	-0.424641	-0.808193	-0.500152	-0.377815	-0.0571134	-0.867406	-0.0804886	-0.368457	-1.34275	-0.557184	-0.545187
chr1_10446829_10497358	-0.0324782	0.301014	-0.433489	0.901109	-0.301059	1.10192	-0.41386	-0.468361	-0.750304	0.72518	-0.485584	-0.276291	-0.128865	0.285203	0.00629553	1.98378	-0.119003	0.139952	0.12143	0.783431	-1.08985	0.132551	0.929416	-0.453185	-0.514773	0.33674	-0.286808	-0.226931	-0.0173539	-0.263891	0.237655	-0.121101	0.0643236	-0.333625	-0.0480754	-0.158048	0.817157	1.20503	-0.0840453	0.735065	-0.087307	-0.183482	-0.243656	0.223145	-0.04698	0.143959	-0.782138	-0.278187	-0.0110828
chr1_10497358_10548000	-0.421142	-0.199005	-1.31935	-0.207514	-0.350555	-0.146263	-0.549913	-0.671839	-0.572324	-0.652872	-0.139333	-0.528825	-0.661211	-0.449487	-0.864516	-0.063092	-0.667666	-0.827916	-0.681651	-1.08997	-0.895315	-0.169927	-0.37117	-0.816023	-0.745699	-0.08292	-0.635109	-0.0764823	-0.404201	-0.362902	-0.411587	-0.414457	-0.963564	-0.428047	-0.561305	-0.516307	-0.701663	-0.0127489	-0.221414	0.0536074	-0.66183	-0.494653	-0.536893	0.410599	-0.471185	-0.770181	-1.04165	-0.247208	-0.308929
chr1_10548000_10598225	-0.436501	-0.745324	0.417637	-0.285316	-0.227486	-0.645125	-0.478707	0.0289715	-0.424445	-0.310652	-0.141752	-0.44147	-0.443778	-0.823781	-0.523932	-0.689919	-0.373273	-0.106059	-0.346511	-1.24194	-0.903965	-0.255837	-1.0019	-1.01871	-0.301918	-0.636745	0.00120642	-0.258071	-0.317152	-0.486418	-0.374502	-0.315563	-0.332732	-0.417284	-0.48864	-0.28299	-1.4015	-0.2543	-0.564151	-0.73738	-0.868369	-0.282186	-0.191636	-0.186329	-0.257101	-0.360448	-0.615401	-0.330779	-0.616175
chr1_10598225_10648478	-0.403143	-0.383474	-0.581701	-0.547629	-0.0881345	0.205513	-0.266522	-0.336921	-0.421008	0.119685	-0.0378272	-0.563345	-0.150911	-0.456232	-0.234252	-0.899896	-0.318507	0.183899	-0.306124	-0.881105	-0.678893	-0.0288291	-0.731567	-1.25244	-0.439529	-0.00218605	-0.347581	-0.0986186	-0.153712	-0.425353	-0.365866	-0.203114	-0.391386	-0.200139	-0.476593	-0.106325	-1.30221	0.328214	-0.315982	-0.629121	-0.0965935	-0.234089	-0.215963	-0.310185	-0.147212	-0.587472	-0.374433	-0.338714	-0.412452
chr1_10648478_10698515	-0.06563	0.118751	0.879613	0.813414	-0.0538711	0.783006	0.0374026	-0.846094	-0.403807	0.254242	1.14917	0.211748	0.615351	0.311503	0.717559	0.661089	0.40465	1.21421	-0.0458684	-0.18329	-0.651427	0.704835	0.411223	-0.0427662	0.596296	0.230904	0.814219	1.12575	0.214862	0.40396	0.53424	0.193147	0.0123537	-0.0114975	0.156798	-0.237219	0.682307	-0.303681	-0.0641068	0.880289	0.236068	0.0503793	0.0262184	-1.05729	-0.0539143	-0.233882	0.0769948	0.00133567	0.144765
chr1_10698515_10748592	-0.044614	0.176809	0.17042	0.244177	0.32928	0.330779	0.0613382	-0.0752132	-0.351593	0.359846	0.209908	0.253308	0.626518	0.140727	0.173701	0.211818	0.318865	0.321495	0.123725	-0.0954538	-0.0693997	0.267349	-0.0268624	0.00998965	0.37581	0.147313	0.14268	0.329266	0.319791	0.0779636	-0.23441	0.0572126	0.0135886	-0.111988	0.167452	0.0534562	0.117568	0.410236	-0.0892558	0.337663	0.107111	0.0512809	0.319513	0.0410165	-0.0444825	-0.131881	-0.343942	-0.131	0.00704584
chr1_10748592_10798615	0.0791604	0.0703007	0.0838489	0.20155	0.0396057	-0.510085	-0.0374507	-0.382235	-0.613819	-0.351609	0.347607	0.183261	0.566836	0.0630452	0.0766935	-0.243864	-0.1679	0.462888	-0.0751813	-0.778166	-0.109953	0.366517	-0.305623	-0.358015	0.327724	-0.127392	0.329272	0.522852	-0.3906	0.156055	-0.17538	0.0120117	-0.055661	-0.330935	0.0617914	0.460439	-0.524147	-0.529331	-0.227857	0.112347	0.116625	0.0441073	-0.0694324	-0.39802	0.1686	-0.195797	-0.558088	0.128961	-0.177016
chr1_10798615_10848781	-0.019986	-0.363646	0.350259	-0.644143	-0.0465248	-1.17331	0.00266559	-0.73117	-0.85679	-0.881545	0.162178	-0.005745	0.339496	-0.360555	-0.265704	-1.38793	-0.469242	0.227251	-0.35643	-1.17681	-0.498333	-0.118737	-0.97451	-0.631253	0.0993151	-0.731233	0.0192204	0.23219	-0.301132	-0.245997	-0.541899	-0.188269	-0.260321	0.0179329	-0.414243	0.35335	-0.726881	-1.32028	-0.0406708	-0.46967	-0.235906	-0.141084	-0.121256	-0.558116	0.117108	-0.395066	-0.825893	-0.150942	-0.071873
chr1_10848781_10898911	-0.493032	-0.400099	-0.0712028	0.220953	-0.486931	0.307633	-0.24307	0.242679	-0.835259	0.443127	-0.144548	-0.519881	-0.0692703	-0.318055	-0.185816	0.55251	-0.0747895	-0.0922687	-0.109219	-0.0343272	-0.894093	-0.247448	-0.139744	-0.52404	0.0338284	-0.092776	0.0723678	-0.0729732	0.0160344	-0.204564	-0.0423376	-0.246383	-0.294576	-0.570752	-0.223035	-0.433608	-0.335314	0.518813	-0.684282	-0.105534	-0.123475	-0.524563	-0.554156	-0.711388	-0.208134	-0.215113	-0.644216	-0.801057	-0.106915
chr1_10898911_10949024	-0.159105	0.0760506	-0.25532	-0.560537	-0.00663673	0.0257925	0.0813476	-0.219753	-0.509267	-0.125027	-0.296519	0.274021	0.119181	0.0804597	0.0322066	0.54245	-0.0496522	-0.171664	0.049302	-0.435238	-0.508687	-0.642864	-0.875349	-0.552691	-0.250414	-0.0509831	-0.358807	-0.0712533	0.114169	0.121064	0.177125	0.0800587	-0.164354	0.123682	-0.169475	0.00716726	-0.711933	0.549228	-0.148272	-0.394179	-0.543344	0.0150501	-0.195801	-0.046014	-0.420205	-0.0769864	-1.03852	0.286164	0.00491972
chr1_10949024_10999442	-0.178987	0.0148349	0.447282	-0.331863	-0.021565	-0.438956	-0.414032	0.0376289	-0.503886	-0.37985	-0.0204516	0.0839002	0.417333	-0.370272	-0.283502	-0.819031	-0.393996	-0.0776521	-0.222969	-0.706621	-0.0937308	-0.0743623	-0.659334	-0.624545	-0.315877	0.151753	0.156614	0.0954759	-0.205069	-0.201967	-0.1416	-0.0808538	0.0580488	-0.11568	-0.407151	-0.172832	-0.922501	-0.603886	-0.0987725	-0.191617	-0.106574	-0.12296	-0.296628	-0.774752	0.196993	-0.465893	-0.598962	-0.0390374	-0.123548
chr1_10999442_11049593	-0.0577037	-0.351648	-0.0729689	-0.379433	-0.0379967	-1.05408	-0.0714774	-0.117533	-0.258731	-0.442108	-0.288944	0.0961098	0.0527169	-0.144562	-0.0822189	-1.68616	-0.337309	-0.503798	-0.216208	-0.732726	-0.0930063	-0.0151187	-0.748749	-0.714189	-0.260128	-0.0914084	-0.119892	-0.500324	0.199693	-0.262362	-0.0677446	-0.236723	0.135646	0.079503	-0.182743	-0.0128836	-1.2164	-0.748194	-0.129284	-0.264985	-0.113605	-0.146454	0.0855834	-0.133549	0.105394	-0.269686	-0.698454	0.0728026	-0.373492
chr1_11049593_11100590	-0.276772	-0.0586462	-0.729361	-0.0613318	-0.203421	0.00373478	-0.348881	-0.254374	-0.957029	-0.177985	-0.949922	0.150264	-0.199202	-0.498332	-0.322935	0.0527557	-0.553234	-0.785259	-0.23656	-0.64598	-0.74015	-0.640644	-0.379323	-0.967782	-1.15858	-0.384489	-0.403047	-1.00669	-0.253132	-0.778857	-0.165272	-0.527622	0.0502415	-0.163785	-0.419175	-0.564302	-0.668036	0.123784	-0.585972	-0.21683	-0.525946	-0.363678	-0.272667	-0.069107	-0.248053	-0.601307	-0.577367	-0.127202	-0.314552
chr1_11100590_11152727	-0.394947	0.0216035	0.0519514	0.504748	-0.525909	0.409375	-0.205749	0.312605	-0.856638	0.178426	-0.418052	0.0334347	-0.438881	-0.338228	-0.197439	0.907985	-0.529189	-0.196748	-0.208773	-0.0513398	-0.900141	-0.309593	0.303672	-0.763461	-0.924924	-0.185253	-0.36017	-0.447983	-0.194317	-0.523584	0.0509559	-0.318009	-0.191885	-0.463816	-0.368036	-0.503507	-0.122165	0.704144	-0.581456	0.0570427	-0.543222	-0.457135	-0.821434	0.0344936	-0.345257	-0.0149816	-1.1488	0.182507	-0.473892
chr1_11152727_11203125	-0.0297647	-0.216286	0.201429	0.740625	0.109038	-0.0830881	-0.0644132	-0.664042	-0.631085	0.0810981	-0.300078	-0.0497152	-0.0814463	0.0458836	-0.00397056	0.949115	-0.0897171	0.510279	-0.171691	-0.370886	-0.736086	-0.0867517	0.15882	-0.45961	-0.284217	0.279093	0.181414	0.215284	-0.0759457	-0.325821	-0.102992	0.0138565	-0.140199	-0.208811	-0.209529	-0.107694	0.0875599	0.365132	0.0143104	0.350931	-0.335216	-0.125872	0.0221867	0.520241	0.00568289	-0.0423711	-0.635778	-0.66211	-0.238714
chr1_11203125_11255204	-0.168188	0.268233	-0.88337	0.0381427	0.129044	-0.949498	0.0881128	0.0181853	-0.367142	0.118565	-0.471291	0.23132	0.12459	-0.123673	-0.0118365	-1.63892	0.609054	-0.151853	-0.404853	-0.277902	-0.666934	0.153879	-0.266775	-0.568484	-0.166238	-0.35567	-0.200948	0.164221	0.0913579	0.140742	0.0107376	-0.061403	-0.10435	0.237103	-0.133395	0.00748893	-0.706861	-0.0968762	0.0304345	-0.70806	-0.230252	0.0215914	-0.0121482	0.235221	-0.125516	-0.224785	-0.788628	-0.0636071	-0.120955
chr1_11255204_11305340	0.105829	0.0276455	-0.919868	0.00780156	0.211615	-0.111218	-0.190181	-0.164905	-0.498951	-0.129989	-0.816996	0.269743	0.142656	0.016587	-0.19643	0.29088	-0.0150578	-0.313363	0.0340636	-0.456845	-0.0570017	0.175956	-0.484947	-0.479427	-0.159662	0.288122	0.520898	-0.343348	-0.196258	-0.17651	0.192028	0.0635045	0.18572	-0.0519918	0.014973	0.0640945	-0.412179	-0.650703	0.138537	0.000176301	-0.011988	0.125585	0.187538	0.327254	-0.0189688	-0.0525125	-0.483789	-0.134582	0.356036
chr1_11305340_11356118	-0.255726	0.060771	-0.745004	-0.546534	-0.360263	-0.368957	-0.340658	-0.0962558	-0.718001	0.365665	-0.686676	-0.285747	-0.549393	-0.277246	-0.414057	0.00153937	-0.165446	-0.696588	-0.282049	-0.698304	-1.30747	-0.24675	-0.300177	-1.19739	-0.50763	-0.307994	-0.840191	-0.915616	-0.247274	-0.0560216	-0.193068	-0.23335	-0.0370593	-0.104364	-0.432751	0.0338445	-0.717805	0.204114	-0.408604	-0.456615	-0.767174	-0.345125	-0.496314	-0.208763	-0.305479	-0.406253	-0.529096	-0.323513	-0.809183
chr1_11356118_11406668	-0.366452	-0.379248	-0.76887	-0.976865	-0.235068	-1.37544	-0.391652	-0.28738	-0.667273	-1.06917	-1.292	-0.225704	-0.778471	-0.411246	-0.827595	-1.46832	-0.601375	-2.02894	-0.290429	-1.4342	-0.651554	-1.34925	-1.05022	-0.967317	-0.653936	-0.405284	-0.800187	-1.41307	-0.362328	-0.542601	-0.468512	-0.429673	-0.326369	-0.348714	-0.739603	-0.327208	-2.71442	-0.650916	-0.405334	-1.85245	-0.395022	-0.303538	0.163517	-0.344933	-0.0281623	-0.388236	-0.441052	-0.232296	-0.821374
chr1_11406668_11456946	-0.0329955	-0.24744	-0.671863	-0.358637	0.135454	0.379474	-0.259037	0.0531325	-0.497477	-0.382944	-0.94202	0.0478149	-0.432566	-0.210999	-0.503059	-0.716356	-0.403991	-0.936435	0.0941292	-1.20228	-0.146024	-0.852723	-0.570771	-0.769675	-0.356659	-0.35829	-0.285876	-0.889306	-0.128797	0.0908265	-0.209773	-0.0161941	-0.118921	0.000554303	-0.227327	-0.294181	-1.85326	-0.18018	-0.278478	-0.981087	-0.608158	-0.0839237	-0.234368	0.10553	-0.138741	-0.0495777	-0.47271	-0.0406772	-0.135002
chr1_11456946_11507400	0.290121	-0.116109	-0.213679	-0.74751	0.263819	-0.680164	-0.165608	-0.205078	-0.346276	-0.250284	-0.839254	0.0158223	-0.0314707	-0.145769	-0.325715	-0.671498	0.37639	-0.766958	-0.0390836	-0.551198	-1.31695	0.0787884	0.17956	-0.177119	-0.14869	0.0119607	-0.194362	-0.879942	0.0905559	0.149514	-0.383405	0.144125	0.0968527	0.364396	-0.196101	-0.19813	-1.62524	-0.363632	-0.0154386	-0.478335	0.0213759	0.100244	0.0580653	-0.256315	-0.192587	-0.298836	-0.304639	-0.0953285	0.331281
chr1_11507400_11557709	-0.0929578	-0.183258	-0.360085	-0.762818	-0.00976508	-0.647566	-0.282029	-0.0739099	-0.55473	-0.102946	-0.639524	0.058452	-0.383103	-0.327358	-0.494	-1.27658	-0.75815	-0.742953	-0.0149269	-0.849386	-0.373133	-0.457807	-0.55976	-0.822206	-0.122354	-0.10886	-0.682692	-0.595975	-0.0851229	-0.116629	-0.0628477	-0.0304101	-0.111186	-0.254285	-0.298016	-0.321159	-1.52431	-0.537446	-0.258618	-1.03077	-0.262021	-0.0334291	0.113687	-0.4402	-0.231199	-0.444359	-0.734017	-0.114318	-0.470468
chr1_11557709_11607796	-0.0329392	0.025279	0.528274	0.399707	0.251428	-0.961925	0.165557	0.209583	-0.211012	0.0430346	0.473539	0.149375	0.538001	0.156292	0.311816	-0.00868886	0.0431852	0.58271	0.292946	-0.380917	-0.254445	0.475595	-0.347075	-0.126348	0.460679	0.285175	0.424559	0.662468	0.367489	0.396933	0.324727	-0.0761611	-0.00421739	0.178782	-0.0815119	-0.149675	0.309732	-0.525923	0.124732	0.602284	0.285965	0.133912	0.161599	0.150422	-0.123761	-0.0429974	-0.262798	0.25525	-0.128927
chr1_11607796_11657998	-0.0915862	-0.111914	-0.109276	-0.759506	0.0922529	-0.547805	0.0323362	0.0549838	-0.495047	-0.453453	-0.725745	0.00327948	-0.188221	0.0313634	-0.497176	-0.638904	0.23571	-0.861545	0.0465203	-0.546261	-0.444931	-0.57057	-1.03733	-0.827408	0.00292097	0.260165	-0.925241	-0.395573	-0.129315	-0.111923	0.0367065	0.040408	-0.118646	-0.158628	-0.364056	-0.473264	-1.94292	-0.824145	-0.548019	-0.853353	-0.389838	-0.0545138	-0.00913287	-0.411508	-0.262458	-0.399333	-0.562985	-0.120242	-0.294317
chr1_11657998_11708323	0.012853	-0.0768819	-0.936593	-0.704558	0.00844274	-0.395991	-0.40899	-0.863368	-0.595856	-0.204878	-0.989147	-0.107303	-0.201104	-0.426428	-0.465483	-0.744144	0.0111291	-1.11187	-0.083454	-0.395368	-0.316389	-0.307103	-0.513189	-0.675174	-0.74757	-0.183675	-0.845303	-1.14175	-0.0257685	-0.0173193	0.246933	-0.048093	-0.374622	-0.00550579	-0.25343	-0.211609	-1.81153	-0.102074	-0.0871002	-1.15115	-0.158163	-0.0555857	0.238612	0.334182	-0.0557295	-0.315416	-1.04372	-0.271305	-0.246757
chr1_11708323_11758663	-0.314602	-0.528291	-0.430203	-0.839832	-0.656152	-0.676066	-0.714857	0.110692	-0.741029	-0.680742	-0.702357	-0.13305	-0.888781	-0.426663	-0.838547	-0.892043	-1.06506	-0.70414	-0.572954	-0.501588	-0.41762	-0.94504	-0.658395	-1.09299	-0.540773	-0.485806	-1.06723	-0.959549	-0.346859	-0.249325	-0.340573	-0.419786	-0.680437	-0.693235	-0.576716	-0.315835	-1.58235	-0.86547	-0.690306	-1.10795	-0.721864	-0.193882	-0.323665	-0.291806	-0.326195	-0.445225	-1.159	-0.493126	-0.500912
chr1_11758663_11808836	0.0831807	0.0286707	0.178114	-0.222232	0.16109	-0.168394	0.0861155	0.077458	-0.340845	-0.505889	-0.134042	0.0457774	0.157179	0.152857	-0.114977	-0.0855234	0.137051	0.28129	0.149904	-0.39564	-0.897587	0.0140523	-0.510318	-0.484832	-0.187732	0.00994126	0.177348	0.111046	0.0809506	0.228635	0.361321	-0.0348026	0.157916	0.342404	-0.0990197	0.309026	-0.59156	-0.165343	-0.0385169	-0.180296	0.0171738	0.0492289	0.347006	-0.142398	0.171256	-0.124977	-0.530157	0.109674	-0.0224258
chr1_11808836_11859116	-0.111015	-0.194744	0.0639471	-0.36359	0.0119449	-0.862079	0.0128194	0.0943112	-0.538746	-0.421899	-0.016012	-0.0387859	-0.144806	-0.225185	-0.379607	-0.837257	-0.748548	0.0617569	-0.146095	-0.991032	-0.800637	0.0338328	-0.520643	-0.741848	-0.325873	-0.0102221	-0.326445	0.0208736	-0.0747997	-0.105005	-0.401693	0.018445	-0.454976	-0.223365	-0.320222	-0.125562	-0.592597	-0.28013	-0.362901	-0.383369	-0.326208	-0.192408	-0.124921	-0.127784	-0.228437	-0.529574	-0.408435	-0.321368	-0.351703
chr1_11859116_11909431	-0.0582903	0.288056	0.432388	0.486575	0.187006	-0.231215	0.0952078	-0.149575	-0.401781	0.0816457	0.833505	0.0365585	0.221796	-0.0616778	0.452791	-0.0951195	0.0298503	0.84618	-0.262643	-0.221013	-0.381093	0.14513	-0.667085	-0.189226	0.1428	0.132843	0.0209275	0.559065	0.174861	0.171612	0.24264	0.0400968	-0.0171867	-0.0255443	-0.124294	-0.115933	-0.331021	0.0976689	-0.1642	0.41193	0.0938048	-0.0797137	0.212931	-0.331885	0.103773	-0.0971676	-0.565754	-0.121895	-0.20072
chr1_11909431_11959684	0.189604	0.205441	-0.397106	0.36695	0.122882	-0.403626	-0.112401	-0.694693	-0.622416	-0.33917	-0.0970773	-0.0149389	-0.0737726	-0.179485	0.234571	-0.182615	-0.0278499	0.150504	-0.0988035	-0.67832	-0.813081	0.364241	-0.565985	-0.533104	-0.230606	0.0756115	-0.263702	-0.360729	-0.221727	0.140976	-0.124188	0.0160087	-0.0449228	-0.0693549	-0.13084	-0.244877	-0.156675	-0.651741	-0.335541	0.106693	0.0674554	-0.0903858	0.0211331	-0.32546	-0.158164	-0.179815	-0.552762	-0.0810303	0.334396
chr1_11959684_12010261	-0.273328	-0.400861	-0.615541	0.133734	-0.269642	-0.294389	-0.603487	0.0430015	-0.964136	0.146275	-1.12126	-0.366455	-0.632266	-0.287803	-0.891934	0.281474	-0.534175	-0.903012	-0.207241	-0.532544	-0.730681	-0.409236	-0.62957	-1.04836	-0.831071	-0.653198	-1.31547	-0.747217	-0.158734	-0.222707	-0.262571	-0.407717	-0.230254	-0.0907919	-0.748141	-0.146527	-1.15071	0.472205	-0.690484	-1.00366	-0.701424	-0.352437	-0.275961	-0.109809	-0.111772	-0.0540842	-1.07558	-0.268649	-0.335664
chr1_12010261_12060981	0.121566	-0.00321412	-0.284469	-0.433818	-0.18198	0.0524958	0.0727664	0.340604	-0.625417	0.0954469	-0.149222	-0.128614	-0.188324	-0.20082	-0.0514882	-0.108451	-0.0833469	-0.241865	0.00528157	-0.757014	-0.315973	0.0271149	0.00720059	-0.692399	-0.326595	-0.0896184	-0.177645	-0.142372	-0.183704	0.00186258	-0.00470491	-0.0729848	-0.0338416	0.0028859	-0.322712	0.111218	-1.00664	0.105057	-0.248577	-0.666698	-0.0998576	-0.0676197	-0.176333	0.417	-0.106436	-0.113482	-0.49163	-0.34045	-0.2332
chr1_12060981_12112066	-0.313594	-0.133553	0.10135	-0.502474	-0.254697	-0.276979	-0.257316	0.328823	-0.591521	-0.620059	-0.824187	-0.196455	-0.76316	-0.474095	-0.793672	-0.457888	-0.0994297	-0.464078	-0.525997	-0.931267	-0.574842	-0.392442	-0.342338	-0.895491	-0.672781	-0.3712	-0.295974	-0.581977	-0.140906	-0.392649	-0.444569	-0.135384	-0.128368	-0.147429	-0.505629	-0.437355	-0.921217	0.0401119	-0.256207	-1.11339	-0.640132	-0.22129	-0.0517889	-0.149472	-0.146547	-0.598934	-0.78747	-0.304813	-0.0601516
chr1_12112066_12162268	-0.08001	0.0180227	-0.35264	-0.64833	-0.570073	0.0481643	-0.315154	-0.530232	-0.460331	-0.500139	-1.22162	-0.0731495	-0.743293	-0.433977	-0.435655	-1.03493	-0.598325	-1.18672	-0.224607	-0.892372	-0.200243	-0.577956	-0.469822	-0.718279	-0.451609	-0.205856	-0.835553	-1.32365	-0.273075	-0.353189	-0.0139137	-0.124232	-0.250894	0.0118192	-0.423876	-0.094645	-1.25173	-0.172893	-0.0961501	-0.918405	-0.414424	-0.0492352	0.0391865	0.0489535	-0.0408222	-0.445379	-0.665142	-0.201772	0.106352
chr1_12162268_12212604	0.16444	-0.0203838	0.0145082	-0.811788	0.122871	-0.519586	-0.159864	-0.282069	-0.455808	-0.71351	-0.30199	-0.241746	-0.322589	-0.341613	-0.215322	-1.26139	-0.181751	-0.127442	-0.313429	-1.18265	-0.377488	-0.114266	-0.869834	-0.515551	-0.105033	0.00194491	-0.125279	0.0477491	-0.244711	-0.11997	-0.763716	-0.250652	-0.0500926	-0.171464	-0.234811	0.276852	-1.68753	-0.676418	-0.340172	-1.21079	-0.349122	-0.15998	-0.360685	-0.408084	0.221848	-0.624977	-0.819993	0.129719	-0.199168
chr1_12212604_12262825	0.0329535	-0.349457	-0.183384	-0.614106	-0.142612	0.148819	-0.371279	0.452821	-0.770962	0.0533361	-0.558625	0.0910644	-0.242241	-0.149416	-0.451656	0.172415	-0.0359311	-0.656717	-0.0587472	-0.404722	-0.430275	-0.357421	-0.38785	-0.69714	-0.229133	-0.147415	-0.563123	-0.51416	-0.018363	-0.174619	-0.00539015	-0.0400564	-0.10838	-0.0764558	-0.164238	0.0283362	-1.15261	0.346306	-0.382433	-0.653238	-0.565125	0.0845891	-0.257281	0.0503972	0.154806	-0.230379	-0.359885	0.124906	-0.434157
chr1_12262825_12313115	-0.18976	0.148746	0.00906062	0.634644	-0.15737	0.149453	-0.100523	0.6921	-0.718882	-0.140492	-0.941116	0.0214044	-0.499131	-0.0262108	0.190771	0.826115	-0.28555	-0.118851	-0.05456	0.153976	-0.374547	-0.00803185	-0.118622	-0.594341	-0.0791416	0.0190186	-0.357145	-0.150266	0.177969	0.0550828	0.397176	-0.12623	-0.230105	-0.063641	-0.156415	0.0970239	-0.0254185	0.712474	-0.216603	0.19857	0.0451271	-0.0919284	-0.105954	0.384381	-0.172528	-0.134062	-0.612823	-0.0975297	0.0718556
chr1_12313115_12363358	0.0376248	-0.0571426	-0.527487	0.345053	0.0945704	0.131247	-0.242195	-0.0737414	-0.335647	0.560006	-0.245462	-0.118712	-0.0633611	-0.142592	-0.182764	0.122036	-0.353836	-0.0891918	0.0785651	-0.84618	0.0259575	-0.187112	-0.0377361	-0.666163	-0.299869	-0.13261	-0.439853	0.120091	-0.084696	-0.450328	-0.556854	-0.218985	-0.306516	-0.0476855	-0.202378	-0.435463	-0.524106	0.451689	-0.194097	-0.836001	-0.12179	0.0248607	-0.00760602	-0.355685	-0.0542002	-0.0991507	-0.413118	0.222415	0.432294
chr1_12363358_12413593	-0.0542882	-0.188246	-0.0336904	0.232097	-0.132908	-0.879116	0.0176109	0.42379	-0.127789	-0.372513	-0.366121	-0.11743	-0.181657	-0.0516066	0.0756215	-0.350499	-0.0548353	-0.341869	-0.0768314	-0.911474	-0.255483	0.141694	-1.07526	-0.491338	-0.151784	0.0690521	-0.0502963	-0.236141	-0.261403	-0.0404009	-0.190974	-0.13486	0.0843089	-0.0765981	-0.416987	0.307075	-1.05156	0.146995	0.0926775	-0.152422	-0.684647	-0.105346	-0.369457	0.260019	0.31524	-0.209585	-0.0450049	-0.103811	-0.353536
chr1_12413593_12464006	-0.234411	-0.113837	-0.331916	0.0275184	-0.17268	-0.542688	-0.491696	0.473043	-0.39662	0.165108	-0.305039	-0.10435	-0.124389	0.00698762	0.0364954	-0.658939	-0.294465	-0.486337	-0.107461	-0.725979	-0.436694	-0.239777	-0.084067	-0.949667	-0.142754	-0.202655	-0.131063	-0.0277991	-0.327445	-0.605859	-0.967328	-0.115624	-0.0415024	-0.184301	-0.255548	-0.142919	-0.870843	0.430813	-0.817974	-0.0228163	-0.0196817	-0.170385	-0.173995	-0.352424	0.281957	-0.574868	-0.716845	-0.109958	-0.149797
chr1_12464006_12514099	0.0902763	0.262482	-0.199634	0.332906	0.397663	0.119495	0.00461541	-0.26731	-0.491018	-0.464843	-0.601026	-0.0791772	0.129595	-0.0274034	0.156895	-1.6036	-1.00919	0.551464	-0.275431	-0.682415	-0.318706	-0.273353	-0.500793	-0.656164	0.115638	-0.105338	0.143528	0.207801	-0.143905	-0.282576	-0.688387	0.0087702	-0.29519	0.246241	-0.327491	0.0584222	-1.05516	0.225078	-0.305062	-0.163441	-0.334289	-0.0213221	0.236684	0.0399832	0.381665	-0.0790003	-0.30772	-0.490919	0.266257
chr1_12514099_12564268	0.275759	0.036868	-1.04853	-0.376041	0.111975	0.517675	-0.130976	0.129638	-0.377465	-0.140839	-0.189249	0.122079	0.120718	0.0885943	-0.0951339	-0.937509	0.331883	-0.413393	0.0740549	-0.668622	-0.440752	-0.389288	-0.285142	-0.373312	0.26144	-0.0394982	0.250781	-0.380835	0.263652	0.279748	0.237733	0.0570529	-0.0661378	0.576687	-0.136903	0.101623	-0.575647	-0.170979	0.0234906	-0.741972	-0.0816368	0.159067	0.0114717	-0.0117071	0.523242	-0.496393	-0.294648	0.103731	-0.0714151
chr1_12564268_12614635	-0.230109	-0.118881	0.0762619	0.22778	-0.117888	0.0976118	-0.235351	-0.323336	-0.771701	-0.150269	0.340503	0.0389534	-0.323886	-0.0842472	-0.0149954	-0.0952872	0.0187454	0.541422	0.00151783	-0.396386	-0.579838	0.139319	0.0710366	-0.527174	-0.147532	-0.180652	0.031058	0.482267	-0.326039	-0.167491	0.0263311	-0.186969	-0.0413727	-0.271847	-0.266643	-0.0712051	0.166975	0.287153	-0.334027	0.495638	-0.0596587	-0.290889	-0.190885	-0.186893	0.0869636	-0.518184	-0.407637	-0.365313	-0.586917
chr1_12614635_12664927	0.124354	-0.110933	-0.533213	-0.518354	0.0363348	-0.221033	-0.237432	-0.173027	-0.118312	-0.164529	-0.818496	0.137364	-0.21397	-0.433019	-0.16511	-0.885064	-0.0241664	-0.502595	-0.526063	-0.769403	0.0539073	-0.595517	-0.406416	-1.14652	-0.383799	-0.0112823	-0.573172	-0.987759	0.150679	-0.103601	-0.210464	-0.0228786	-0.172793	0.0187636	-0.335723	-0.0119158	-1.31373	-0.427539	0.0442904	-1.07537	-0.455494	-0.0252432	-0.158682	-0.34742	0.45798	-0.46359	-0.493923	-0.151952	-0.0627489
chr1_12664927_12715220	-0.223692	-0.468132	-0.89392	-0.161201	-0.236553	-0.805422	-0.40907	-0.0984768	-0.620736	-0.448089	-0.667655	-0.171616	-0.0751006	-0.391882	-0.0741344	-0.37014	-0.475428	-0.33223	-0.150232	-0.692789	-0.58201	-0.751087	-0.959121	-0.678398	-0.436997	-0.0191179	-0.210165	-0.696432	0.00611962	0.173846	-0.374375	-0.156461	0.175149	-0.217262	-0.436795	0.105511	-0.895144	-0.248856	-0.230697	-0.692331	-0.652792	-0.0803726	-0.11573	0.0873018	0.206373	-0.252272	-0.449159	-0.175113	-0.137572
chr1_12715220_12766147	0.280321	0.00167276	0.33573	-0.0297663	0.230752	0.0520769	0.109919	0.0739085	-0.228119	-0.118844	-0.216746	0.11298	0.373437	-0.0800451	0.19211	-0.325637	0.106462	-0.0227175	-0.0551654	-0.781127	-0.661958	0.101414	-0.352631	-0.424562	-0.149747	0.106344	-0.0801674	-0.493664	0.0429219	0.15288	0.0806703	0.1519	0.269498	0.307939	-0.185278	0.177351	-0.777774	0.0818355	0.0395651	0.051431	-0.122661	0.103321	0.0725727	0.183412	0.300846	-0.0412239	-0.0820419	0.196474	0.0116629
chr1_12766147_12816478	-0.299005	0.0790242	-0.44626	-0.0579068	-0.285671	-0.209087	-0.330626	-0.0479543	-0.494276	-0.387964	-0.383397	-0.493758	-0.381677	-0.166208	-0.0306284	-0.166285	-0.184563	-0.313544	-0.0523376	-0.926443	-0.693829	-0.504544	-0.274066	-1.27203	-0.362019	-0.0666576	-0.378237	-0.394878	-0.429481	-0.549881	-0.0576795	-0.115624	-0.156127	-0.652311	-0.606689	-0.404326	-0.966155	-0.201617	-0.877187	-0.740032	-0.306539	-0.228025	-0.0532778	-0.644993	-0.655408	-0.393944	-0.609259	-0.326399	-0.138508
chr1_12816478_12866702	-0.434067	-0.682002	-0.681852	-0.615921	-0.468047	-0.0750194	-0.662776	-0.50476	-0.680851	-1.07239	-0.598692	-0.423656	-0.397854	-0.503402	-0.530029	-0.959555	0.0413858	-0.976808	-0.248289	-1.33507	-0.991971	-0.742231	-1.02613	-0.913063	0.00331664	-0.424487	-0.410759	-0.415716	-0.4638	-0.0287666	-0.0400957	-0.242002	-0.358509	-0.439295	-0.585472	-0.238854	-1.87376	-0.642526	-0.856732	-1.72241	-0.671262	-0.342746	-0.497538	-0.12911	-0.6646	-0.395131	-0.800649	-0.307289	-0.453251
chr1_12866702_12918697	-1.34956	-0.917247	-1.12164	-1.55476	-1.00563	-1.36711	-1.43741	-0.927861	-1.50652	-1.4456	-1.49	-1.0424	-1.03064	-1.29345	-0.69144	-0.883553	-0.952437	-1.41122	-1.15647	-2.10687	-2.10087	-1.44072	-2.49048	-1.36097	-1.39712	-0.382342	-0.513366	-0.965067	-1.1959	-1.56367	-0.943495	-0.264083	-1.01415	-1.29355	-1.57052	-1.21579	-2.11071	-0.486787	-1.88648	-1.20345	-0.855379	-1.18732	-0.703522	-0.351167	-1.23768	-1.24456	-1.37503	-1.68176	-0.614506
chr1_13172519_13322710	-1.90362	-1.66821	-1.1897	-2.25887	-1.17377	-1.37921	-1.55175	-0.73406	-2.07325	-1.3854	-3.25955	-1.81631	-1.94888	-1.45037	-1.61549	-1.33924	-1.42388	-3.1354	-1.60257	-2.00399	-1.88764	-2.36574	-1.50693	-2.53831	-1.77361	-1.9455	-1.92152	-1.79261	-1.67903	-2.21683	-1.19088	-1.70075	-1.54208	-1.69186	-2.01314	-1.66202	-1.54288	-1.53484	-1.59387	-1.97397	-1.2295	-1.60334	-1.86176	-1.03436	-2.14642	-1.70956	-2.48306	-1.78055	-2.02884
chr1_13783102_13833466	-0.269092	-0.476975	-1.54931	-0.37754	-0.289965	-0.339049	-0.483886	0.281027	-0.447027	-0.536421	-1.13134	-0.0725606	-0.204245	-0.164018	-0.335487	-0.561695	0.0913451	-1.53083	-0.0196074	-0.735604	-0.0451128	-0.360602	-0.628763	-1.4648	-0.807729	-0.100816	-0.599645	-0.904011	-0.395906	-0.340562	-0.511959	-0.142941	-0.489757	-0.349362	-0.415891	-0.396507	-1.54605	-0.0966176	-0.333472	-0.660961	-0.408547	-0.148105	-0.25088	0.398117	-0.482681	-0.330533	-0.690275	-0.0170505	-0.0563492
chr1_13833466_13883932	-0.342452	-0.0366959	-1.05613	0.177269	-0.423224	-0.268407	-0.423109	0.00393664	-0.93668	0.216172	-0.597337	-0.171516	-0.472755	-0.282737	-0.389783	0.822842	-0.692139	-0.430729	0.0346084	-0.171579	-1.08592	-0.42836	-0.175023	-0.788724	-0.430856	-0.180869	-0.225562	-0.503278	-0.389597	-0.00833297	0.0989175	-0.252274	-0.126955	-0.305924	-0.444508	-0.567491	-0.670242	0.440937	-0.384251	0.111373	-0.277155	-0.227433	-0.192208	-0.0682936	-0.919824	-0.232376	-0.421093	-0.201804	-0.591629
chr1_13883932_13934307	-0.47907	-0.443012	0.087259	-0.0978885	-0.205764	-0.298124	-0.365368	-0.0340406	-0.891725	-0.181371	-0.135568	-0.406413	-0.689279	-0.265492	-0.473401	0.0442778	-0.970908	-0.224935	-0.26971	-1.46578	-0.663864	-0.23231	-0.383861	-0.941391	-0.450323	-0.519558	-0.650382	-1.01572	-0.425538	-0.0459399	-0.00498585	-0.415883	-0.346727	-0.412086	-0.47149	-0.566144	-0.996413	0.198313	-0.380329	-0.46935	-0.280235	-0.39789	-0.111951	-0.306008	-0.799989	-0.681376	-0.855231	-0.100864	-0.317664
chr1_13934307_13985609	0.158934	-0.150049	0.061693	0.0213508	-0.145785	-0.236787	-0.117463	-0.121835	-0.399686	-0.170713	-0.842018	-0.0114221	-0.104214	-0.266156	0.0271192	0.126568	-0.234163	-0.186066	0.275479	-0.963629	-0.649476	0.235442	-0.644563	-0.913924	-0.232859	-0.212225	-0.423642	-0.293331	0.214478	0.124058	-0.128835	0.176218	0.187431	-0.0178552	-0.115128	0.22533	-0.941078	0.063497	0.108191	-1.25311	0.093855	0.0285385	0.0674007	-0.424216	-0.0963554	-0.355384	-0.292635	0.105828	-0.16692
chr1_13985609_14036447	-0.205252	0.108966	0.369212	0.534567	-0.344753	-0.438548	-0.0115658	-0.408473	-0.523126	0.202679	0.525103	-0.155186	-0.285037	0.0600617	0.0481546	0.924243	0.418952	-0.0353264	0.0346229	-0.523417	-0.404361	0.325834	-0.211937	-0.836458	-0.217734	-0.0408442	0.010902	0.0979483	-0.173277	-0.366396	-0.245945	-0.0797786	-0.231823	-0.100651	-0.159861	-0.0233527	-0.0174838	0.472107	-0.124657	0.346636	-0.550509	-0.140169	-0.129361	0.0919416	-0.342532	-0.0712533	-0.330157	-0.179683	-0.098314
chr1_14036447_14086924	0.129789	0.217717	0.365684	0.278476	-0.0770348	0.555531	-0.0920083	0.214133	-0.139435	0.428438	-0.408167	0.246435	0.493033	0.198814	0.269386	0.226264	0.441041	0.0149766	0.157944	-1.15258	-0.216864	-0.171022	0.149828	-0.52226	0.294195	0.389477	0.355708	-0.230245	0.206701	0.142021	0.461034	0.0102668	0.333719	0.282924	-0.202086	0.466253	-0.224162	0.0968473	-0.126284	0.345306	-0.000952125	0.161647	0.23522	-0.0856573	0.245377	-0.236673	-0.255788	0.181593	0.170902
chr1_14086924_14137228	0.18186	0.271685	0.0367661	0.0657623	-0.0688365	-0.0649026	0.132902	0.218991	-0.034918	0.200569	-0.00390462	0.292177	0.465998	0.0692234	0.225303	-0.698275	-0.603045	-0.388671	0.350224	-0.288144	0.311974	0.471554	-1.00388	-0.336965	0.382389	0.0357251	0.108485	0.358265	-0.0724589	0.49819	0.395241	0.120046	0.293562	0.328586	-0.026099	0.238488	-0.646047	-0.630229	0.135108	-0.095782	0.444886	0.242585	0.378953	-1.35281	0.244171	-0.237876	-0.39889	-0.0739265	0.0277651
chr1_14137228_14187667	0.152589	0.075754	0.957481	-0.209192	0.0607192	-0.0621168	-0.0798262	-0.0237203	-0.318691	0.0799655	0.397694	0.0545724	0.113212	0.11244	-0.00717759	-0.171841	0.11859	0.641648	0.262116	-0.488176	-0.154939	0.12736	-0.504045	-0.611981	0.0757015	-0.190577	0.171061	0.636418	-0.00899176	-0.00291061	-0.514872	-0.128944	-0.200944	0.117363	-0.16542	0.146026	-0.712594	-0.148744	-0.126231	0.122878	0.028657	-0.0387594	0.187069	-0.768066	-0.0279763	-0.134876	-0.617397	-0.33068	-0.446617
chr1_14187667_14237750	0.305345	0.298478	0.261179	0.0485488	0.351443	0.422031	0.0595794	0.168334	-0.329767	0.321286	-0.127437	0.130018	0.081624	0.388881	0.00753628	-0.0332926	-0.221934	-0.0347231	0.115169	-0.745614	0.176832	0.302192	-0.50363	-0.123181	0.442651	0.113225	0.248238	0.557673	0.0867365	0.255544	-0.00815136	0.159205	0.0703899	0.258987	0.0158678	-0.0138327	-0.967417	0.266446	0.264805	0.603473	0.55748	0.210761	0.35179	0.287681	0.0521366	-0.0935564	-0.170144	0.0666985	0.512366
chr1_14237750_14288362	0.114167	-0.0972394	0.150338	-0.311253	0.102359	0.167929	0.170021	0.0597113	-0.375706	-0.396245	0.124325	-0.0205469	-0.176568	-0.0141176	0.0152335	0.0584448	0.149096	-0.493557	0.160087	-0.437004	-0.345006	0.274232	-0.974339	-0.568524	0.278994	0.241126	0.105786	-0.0580192	-0.00977672	0.322501	0.23024	0.273375	0.229767	0.219928	-0.0971097	-0.253479	-0.92075	-0.0702592	-0.0903871	0.139244	0.271385	0.0553441	0.360512	-0.206169	0.129262	-0.00498946	-0.236752	0.086302	0.300513
chr1_14288362_14339049	-0.162729	0.472911	0.205626	0.35314	0.200015	0.442209	-0.0785694	0.25004	-0.424219	0.464176	0.222306	0.0694403	-0.0193281	0.189104	-0.0725767	1.14501	0.380762	0.339049	0.271975	-0.797277	-0.19946	-0.0174325	0.00882817	-0.286283	0.214489	0.375816	-0.17394	0.441767	0.185498	0.0121865	0.204239	0.180371	0.028791	0.0741783	-0.18014	-0.360875	-0.331294	0.520547	-0.121477	-0.476255	-0.0835659	-0.00424848	-0.120462	-0.509781	-0.224541	-0.0390957	-0.124264	0.134265	0.123634
chr1_14339049_14390628	-0.0844131	0.284728	0.279486	-0.141143	0.0522971	0.250002	0.142422	0.32387	-0.258321	0.0768929	-0.282416	0.132505	0.267492	0.165767	0.20501	-0.220411	-0.10545	-0.0352175	0.180957	-0.585966	-0.473133	-0.0931163	-0.0981425	-0.391878	0.296476	0.428655	-0.254994	-0.449373	0.168083	-0.0622945	0.329957	0.167009	-0.30868	0.121157	-0.308709	0.204494	-0.321235	-0.128557	-0.0606218	0.161963	0.283982	0.222882	-0.130982	-0.269756	-0.194013	-0.0830623	-0.256453	0.0709719	0.0615459
chr1_14390628_14440737	0.181343	0.184513	-0.735751	-0.155108	0.27577	-0.217492	0.189614	0.0596561	-0.0984008	0.252071	-0.262074	0.222331	-0.0204462	0.015707	0.260854	0.0586501	0.0689968	-0.405881	0.0727034	-0.592182	-0.224862	0.118326	-0.021314	-0.356983	0.340078	0.094998	-0.230959	-0.917962	0.410299	0.301151	-0.353679	0.124035	-0.0638197	0.123434	-0.0700744	0.0460565	-1.12698	-0.00147162	-0.239672	-0.404391	-0.160042	0.18477	0.316193	0.164954	-0.206074	-0.101621	-0.185182	0.113873	-0.0654175
chr1_14440737_14490910	0.331809	0.0391277	0.153688	0.368566	0.0731971	0.0807772	-0.145196	0.287921	-0.256688	0.0960322	-0.150193	0.18176	0.154051	-0.0277568	0.449929	-0.0819449	-0.415865	-0.733775	0.243835	-0.295946	-0.0611725	0.312323	-0.114731	-0.592647	0.0293064	0.134071	0.195346	-0.468753	0.0311318	0.32281	-0.0314094	0.225897	0.322976	-0.027317	-0.116419	0.242705	-1.3017	0.381361	-0.1133	0.0577596	0.0300634	0.278491	0.347115	-0.289881	-0.247288	-0.0868004	-0.289183	0.088164	-0.00212964
chr1_14490910_14541014	0.108764	-0.0299262	-0.215815	-0.105138	0.150625	0.578459	0.0229908	-0.473464	-0.800787	-0.309446	-0.615569	0.275316	0.351454	0.0578017	0.150991	0.421352	0.154649	-0.322733	-0.00378954	-0.964658	-0.261412	0.425653	-0.146272	-0.428699	0.0811965	0.253186	0.339264	0.319583	0.235721	0.254862	-0.0861834	0.209898	0.234771	0.186258	-0.199369	-0.0533518	-0.550588	-0.435396	0.124308	-0.230437	0.0674954	0.298041	0.0546194	-0.215314	0.0343122	-0.129889	-0.0553199	0.156834	-0.138316
chr1_14541014_14591795	0.066699	0.297114	-1.30297	-0.15068	0.0546644	0.221963	0.111099	0.132177	-0.334435	-0.174616	-0.148744	-0.074876	0.377244	0.15947	0.16248	-0.0141316	0.101808	0.0795353	0.104002	-0.240723	-0.650727	0.338285	-1.35662	-0.29816	0.208643	-0.0742861	0.073415	0.136691	-0.0522663	0.514078	0.100244	0.179211	-0.0345379	-0.0591082	-0.0268424	0.0731628	-0.905953	-0.159558	0.034769	0.147056	-0.192672	0.177944	0.164609	-0.341404	-0.156991	-0.157629	-0.122539	-9.93833e-05	0.209296
chr1_14591795_14642440	0.137899	0.103056	-0.450881	-0.382274	0.198292	0.172843	-0.07329	0.0544994	-0.316339	0.484105	-0.323111	0.168137	0.242684	0.322743	-0.0158594	0.201676	-0.136576	0.0878642	0.332554	-0.804094	-0.693986	-0.108241	-0.0620827	-0.631612	0.276196	0.279798	0.0340268	-0.135365	0.208924	0.809828	0.442731	0.34437	0.40239	0.0549029	0.0676415	0.220343	-1.31438	-0.28778	0.385646	-0.00722924	-0.0640283	0.259412	0.469296	-0.232433	-0.191717	0.319947	-0.143431	-0.08342	0.420998
chr1_14642440_14693036	-0.172848	0.157595	-0.754286	-0.500675	-0.143323	-1.06187	-0.291727	0.221395	-0.592229	-0.135081	-0.406855	-0.0191303	-0.048972	0.0178358	-0.120897	-0.329564	-0.09654	-0.363064	-0.0110409	-0.59333	-0.74764	-0.249564	-0.162243	-0.616059	-0.285315	-0.290026	-0.714663	-0.51457	-0.00169941	-0.183413	-1.10638	-0.0589381	0.0228675	-0.210215	-0.209548	-0.0976866	-0.742522	0.134329	-0.404872	-0.384953	-0.0243948	-0.0154013	-0.029562	0.142355	-0.265822	-0.231634	-0.54518	0.038136	-0.156298
chr1_14693036_14746188	-0.00269593	0.283173	0.0420795	0.221879	-0.0462587	-0.563901	-0.0631962	0.00798241	-0.25631	-0.332107	-0.0606026	0.322178	0.136699	0.0651959	0.0228543	0.0886324	-0.50956	-0.626969	0.0563536	-1.10791	-0.0533576	0.178739	-0.262307	-0.627945	0.19993	0.203519	-0.0474118	-0.374819	0.088045	0.288488	-0.307996	-0.0129589	0.264971	0.199005	-0.0786042	-0.438429	-1.37616	-0.219787	-0.0965794	-0.0816134	0.101877	0.0624444	0.110419	0.0963077	-0.187102	-0.231748	-0.385476	0.135272	-0.0553566
chr1_14746188_14796321	0.305337	0.417055	0.581689	0.603511	0.593412	0.552864	0.177417	0.0265147	-0.485579	0.656337	0.211012	0.3613	0.58308	0.251365	0.18217	1.14964	0.651843	0.321201	0.386092	0.271635	-0.102944	0.623848	-0.0890938	-0.637642	0.399222	0.0382733	0.197582	0.335453	0.227559	0.493185	0.0441799	0.356502	0.416766	0.219974	0.081328	0.225996	0.381755	0.76265	0.190822	0.733401	-0.0273195	0.408388	0.407265	-0.185062	0.210862	0.334839	-0.0997779	0.0397143	0.0556732
chr1_14796321_14846390	0.100197	0.149145	0.4387	0.134594	0.10377	-0.0155481	0.00486161	0.23946	-0.363489	0.107348	-0.101225	0.494062	0.108277	0.123395	-0.0975929	-0.803926	0.311567	0.143755	0.0795305	-0.620299	-0.542644	0.199078	-0.339421	-0.189362	0.137384	0.112926	0.183046	0.00929311	-0.00367747	0.305597	0.107283	0.305764	0.33013	0.0497145	-0.159948	0.218265	-0.730957	0.0416623	0.0813173	-0.167172	0.168793	0.248328	0.408974	0.348807	-0.154182	-0.184308	-0.476997	-0.0537144	-0.0146254
chr1_14846390_14896863	-0.0877737	0.0800897	-0.331212	0.0985758	0.299243	0.22352	0.122563	0.298304	-0.549328	-0.210735	0.0154844	0.0613573	0.062214	-0.205409	-0.396119	-1.59472	0.326315	-0.554899	-0.150133	-1.05627	-0.101028	0.255072	-1.23971	-0.255325	0.144855	0.0136455	-0.140679	-0.0262974	0.138066	-0.0159116	-0.0223651	0.0434864	0.216636	0.193373	-0.354682	-0.133338	-0.319557	-0.14154	0.182799	-0.118713	-0.151461	0.0465431	0.315448	0.361974	-0.116497	-0.105703	-0.274593	-0.103157	-0.314994
chr1_14896863_14946933	-0.0124543	0.0869661	-0.64089	0.381577	-0.110273	0.879998	0.0898525	0.602978	-0.375051	0.990414	0.218497	0.0693658	0.0689556	0.390707	0.227233	1.6258	0.159777	0.460293	0.224032	-0.133863	-0.250347	0.272227	0.0679983	-0.16791	0.404998	0.401349	0.117388	0.45722	0.0941142	0.535197	0.67372	0.178399	0.317204	0.0388707	0.0338763	-0.130021	0.377006	1.43865	-0.0586915	0.904217	-0.0566578	0.250748	0.347297	0.276094	-0.337616	0.344723	-0.460975	-0.200587	0.336716
chr1_14946933_14997070	-0.0856926	0.291991	-0.174491	-0.458287	0.210079	0.181542	-0.188139	0.0741675	-0.523155	0.00468276	-1.05409	-0.0944414	-0.343381	-0.0942952	-0.365101	-0.862534	-0.225271	-0.343352	0.0419795	-0.703676	0.26464	-0.567324	-0.264524	-0.210682	0.121524	-0.144425	-0.0858634	0.0177171	0.185856	0.091514	0.368589	0.0152795	0.0166156	0.076549	-0.137969	-0.0273437	-0.76358	-0.168045	-0.093709	0.16014	-0.169289	0.178392	0.205307	-0.0608324	-0.141643	-0.368122	-0.209785	-0.180946	-0.0436963
chr1_14997070_15047205	0.125921	-0.113071	-0.370324	-0.668356	0.101972	-0.229818	-0.156394	0.157069	-0.533721	0.0802997	-0.884059	0.110622	-0.0900704	0.0773435	-0.113577	-1.01746	0.140716	-0.488092	0.0774036	-0.64461	-0.817835	0.269351	-0.453756	-0.351294	0.215222	0.213133	-0.166555	-0.707494	0.247303	0.00217243	-0.154724	0.0767812	-0.128315	0.0803655	-0.0804699	-0.0342403	-1.53158	-0.110943	-0.0138792	-0.502434	0.165808	0.172877	0.0257553	0.205888	-0.0603446	-0.171474	-0.767517	0.280546	-0.103401
chr1_15047205_15097401	-0.00751512	0.141407	-0.304074	-0.0789432	0.20948	0.199147	-0.0606742	0.326732	-0.366704	0.0912601	-0.739082	0.0392647	-0.313487	0.0186501	-0.0589318	-0.659247	0.271206	-0.110749	0.012172	-1.00414	0.09959	-0.61168	-0.63651	-0.660352	-0.125729	-0.139766	-0.188518	-0.591481	0.0603013	0.0516521	-0.16512	0.0221113	-0.201055	0.0331003	-0.320147	-0.112069	-1.33753	-0.320395	0.0437042	-0.482295	-0.332618	0.181761	0.123141	-0.194802	-0.183206	-0.0719653	-0.542843	-0.0134105	-0.0528293
chr1_15097401_15147592	0.375261	0.274982	-0.055449	0.0731246	0.549546	0.0567422	-0.0279021	0.0932004	-0.149709	-0.0489355	-0.561401	0.455553	-0.154679	0.210661	0.175432	-0.755319	0.133717	-0.548912	0.480305	-0.324328	-0.0416473	0.114946	-0.181778	-0.40199	0.411163	0.6067	-0.335975	-0.361817	0.297491	0.307351	0.450544	0.373043	0.370285	0.384127	0.23869	0.0115075	-1.31248	0.00940744	0.2894	-0.445485	0.37961	0.456395	0.637382	0.471589	0.079881	0.330116	-0.276285	0.124157	0.13931
chr1_15147592_15197771	0.126733	0.425808	0.152922	-0.467589	0.121307	0.125944	0.0705806	-0.156865	-0.221221	-0.193749	-0.567628	0.22311	0.281236	-0.0163311	-0.0657822	-1.16007	0.154922	-0.864879	0.25572	-0.719162	-0.51009	-0.102331	-0.746073	-0.473467	0.0617986	0.157921	-0.311321	-1.05551	0.133282	0.241027	0.0933516	0.215633	0.127939	0.29611	-0.0764257	-0.0811557	-1.13834	-0.298142	-0.157637	-0.751909	0.122046	0.170561	0.458519	-0.488598	0.0354833	-0.103947	-0.240878	-0.258935	0.251835
chr1_15197771_15248120	-0.229373	0.024649	-0.926203	-0.764154	-0.0671597	-0.207458	0.029423	-0.95161	-0.332425	-0.796834	-1.64377	-0.0783482	-0.0801153	0.0056011	-0.181222	-0.476393	-0.307104	-0.847012	-0.119561	-0.715918	-0.44034	-0.296664	-0.45752	-0.800735	-0.146726	-0.0466806	-0.560855	-0.182628	0.219072	-0.050817	-0.358183	-0.0889283	-0.0206564	-0.173779	-0.472391	0.163001	-2.31993	-0.462708	-0.0883849	-1.05896	-0.154594	-0.041442	0.358066	-0.574943	0.0242602	-0.274355	-0.378605	-0.19339	-0.220798
chr1_15248120_15298283	-0.159978	0.128477	-0.179862	-0.154615	0.0662388	0.0278669	-0.027328	0.520844	-0.328631	-0.113629	-0.35217	0.145829	-0.102347	-0.156694	-0.226282	-0.607473	-0.00306162	-0.29813	0.0128894	-0.37611	0.00605125	-0.46293	-0.203672	-0.839433	-0.205741	0.326876	-0.0475109	-0.352031	0.335463	0.389366	0.287726	0.0393568	0.0885608	0.0810276	-0.0408528	-0.106413	-1.43217	0.238405	-0.232984	-0.783096	-0.0997376	0.23043	0.133444	0.111214	-0.0330574	-0.198525	-0.455779	-0.0182002	0.0719847
chr1_15298283_15348629	0.226981	0.08247	-0.0771922	-0.872536	0.29124	0.474804	0.00446725	0.176524	-0.0524467	-0.120458	-0.322346	0.221346	-0.0147375	-0.131372	-0.20732	-1.26822	-0.147165	-0.599357	-0.00065936	-0.349914	0.185758	-0.565491	-0.980105	-0.703298	-0.206192	-0.17753	-0.0948346	-0.256847	-0.0845674	0.116652	-0.180945	0.192367	0.267046	0.159555	0.00732827	-0.332207	-1.76588	-0.548803	-0.0738194	-0.903725	-0.00897516	0.30374	0.13398	0.326453	-0.057272	-0.265694	-0.853042	0.276642	0.0626453
chr1_15348629_15399004	0.341904	0.215014	0.618917	-0.0774798	0.505364	0.0780693	0.0822191	0.214584	-0.0910428	0.177285	0.267862	0.376231	0.401026	0.150022	0.0730005	-0.244577	-0.0815725	0.138817	0.37241	-0.45637	0.308671	0.404255	-0.164954	-0.285376	0.147074	-0.0229579	0.106348	0.601649	0.332857	0.368724	0.410658	0.302323	0.234989	0.36983	-0.0124342	0.155415	-0.229471	0.39752	0.285513	0.179781	0.17344	0.14123	0.251898	-0.0697113	0.12862	-0.0711127	-0.0675194	0.362099	0.200284
chr1_15399004_15449053	0.170689	0.0485341	0.667621	-0.163307	-0.132651	-0.222478	0.0399918	-0.048542	-0.379039	-0.375564	0.175858	0.127221	0.0203951	-0.00718767	0.112295	-0.566458	-0.289826	0.388407	0.0397464	-0.69472	-0.377467	-0.0529341	-0.755323	-0.414936	0.248453	0.169943	0.0691113	0.48976	0.0870305	0.0859374	-0.171845	0.000368279	0.163476	0.22757	-0.0823665	-0.191188	-0.425417	-0.661277	0.0552928	0.0254237	0.266303	0.0196791	0.208385	0.310944	0.504254	-0.33207	-0.38718	-0.0244973	0.359527
chr1_15449053_15499296	-0.119627	0.227291	-0.0321329	0.0889938	-0.100686	-0.945803	-0.0251853	-0.102947	-0.632482	0.25702	-0.274834	0.0647773	-0.23305	0.143621	-0.353988	0.0803362	0.0878876	-0.366981	-0.113736	-0.566659	-0.442621	0.0897601	-0.199653	-0.451933	-0.25662	-0.229546	0.0366429	-0.575016	-0.00683206	-0.0545233	0.137587	-0.132978	0.332825	-0.0732199	-0.143549	0.121464	-0.00365939	-0.0836678	-0.00738946	0.226911	-0.13874	-0.0342037	0.0273092	-0.400333	0.133524	-0.305118	-0.801055	-0.00535948	-0.223793
chr1_15499296_15549470	0.120644	-0.206037	0.323753	-0.0594884	0.334561	-0.51223	-0.0490609	-0.217552	-0.347541	-0.225807	-0.116355	-0.0112197	0.380962	-0.272468	-0.00902561	-1.41614	0.080089	-0.0473616	0.0151303	-0.711845	0.18855	-0.341025	-0.483009	-0.57367	-0.256556	0.0181385	0.120173	-0.409899	-0.0340702	0.23217	-0.281635	0.029639	-0.207411	0.288473	-0.313386	0.825598	-0.322884	-0.446073	-0.0186916	-0.488917	-0.106123	0.0769667	0.115961	-0.565062	0.572405	-0.28363	-0.387626	0.0340475	-0.0637661
chr1_15549470_15600285	0.204448	0.478445	-0.544524	0.800283	0.0418233	0.893463	0.23159	0.16386	-0.360221	0.533471	-0.194347	0.175979	0.053965	0.381741	0.38717	0.985485	0.123749	0.0930172	-0.0194404	-0.224756	-0.742323	-0.389334	0.203012	-0.517564	0.0977261	0.0955202	0.0418887	0.0895	0.178476	0.396982	0.637643	0.0956892	-0.0365364	0.152435	-0.18072	0.449255	-0.112063	0.771108	-0.249904	0.3786	0.0084089	0.0795696	0.220509	-0.444275	0.282833	0.339686	-0.294665	-0.291191	-0.0914399
chr1_15600285_15650875	0.202551	-0.0775271	-0.438055	-0.028715	0.229899	0.361007	-0.0837687	0.0102785	-0.321033	-0.16965	-0.25285	0.103096	-0.1555	0.209271	-0.068813	-0.522677	0.0731428	-0.0314874	-0.261068	-0.910978	-0.452908	0.00464192	-0.0220031	-0.963533	-0.241117	0.067584	-0.000836898	0.0714666	0.16992	0.00223384	-0.596188	0.0498839	-0.0145119	0.0562184	-0.126759	0.217136	-0.912718	0.209298	-0.333047	-0.680888	0.0120597	-0.0470379	0.13054	-0.0370346	0.510524	-0.0341812	-0.508837	-0.26234	-0.285396
chr1_15650875_15701023	0.278159	0.357052	-0.3054	-0.346807	0.213485	-0.239113	0.163487	-0.324112	-0.017593	0.0720098	-0.863752	0.265236	0.0862674	-0.177394	-0.333906	-0.274885	-0.0146618	-0.526825	-0.0190241	-0.767386	0.0507888	-0.284202	-0.922342	-0.790881	-0.0826303	0.255549	-0.361312	-0.774806	0.341095	0.104765	-0.270841	0.149864	0.317688	0.330508	-0.0680602	0.913856	-1.24033	-0.473805	0.00368098	-0.310424	0.037885	0.199449	0.553333	0.136091	0.684987	0.127996	-0.0436943	0.198064	-0.29712
chr1_15701023_15751722	-0.362704	-0.0915764	-0.179107	-0.581946	-0.36292	0.300281	-0.401095	0.266478	-0.710075	-0.44426	-0.889155	-0.440082	-0.585215	-0.158189	-0.262336	-0.268477	-0.574203	-0.440247	-0.544451	-0.523185	-1.09239	-0.898664	-0.483737	-0.913001	-0.431504	-0.098837	-0.471385	-1.09423	-0.15761	0.144119	-0.540122	-0.156199	-0.272931	-0.146636	-0.281065	0.0342959	-1.79781	0.301569	-0.257161	-0.822994	-0.594365	-0.0805022	-0.138603	-0.0425373	-0.0523536	-0.0587756	-1.31608	-0.325278	-0.395798
chr1_15751722_15801872	-0.225346	-0.0791239	0.0330518	-0.139943	-0.199762	-0.0854192	-0.505337	0.0949158	-0.83244	0.153173	-0.0614213	-0.23588	-0.258069	-0.328431	-0.271083	0.117247	-0.708122	-0.302831	-0.248025	-0.780479	-0.44155	-0.363567	-0.283185	-0.684728	-0.463343	-0.0481781	-0.179728	-0.313466	-0.135851	-0.247115	-0.049744	-0.257475	-0.31333	-0.0899196	-0.409328	0.015039	-0.289834	0.449844	-0.34586	-0.47899	-0.233602	-0.296934	-0.177523	0.0265618	0.0540679	-0.35554	-0.741956	-0.255892	-0.223643
chr1_15801872_15852126	-0.136249	0.101922	-0.0494924	0.0563848	-0.101607	0.268282	-0.232027	0.14299	-0.568877	0.406982	-0.61294	-0.0323141	-0.378626	-0.0446146	-0.160348	-0.170279	-0.36644	-0.703903	0.0472672	-0.539462	-0.259621	-0.0423989	-0.248098	-0.917828	-0.447382	-0.364592	-0.591534	-0.652397	-0.0460958	-0.245364	-0.0457886	-0.0232986	-0.111055	-0.0202612	-0.65662	0.00853251	-0.65434	0.525151	-0.377017	-0.25952	-0.0925933	-0.280628	-0.114632	-0.16926	-0.364596	-0.142744	-0.524855	-0.291318	-0.426834
chr1_15852126_15902401	-0.10565	-0.306835	0.455853	0.291693	-0.219224	-0.0119808	-0.367417	0.0574803	-0.48645	0.547051	0.00307932	-0.11855	-0.21722	-0.0108583	-0.259991	0.374374	-0.153034	-0.0569543	-0.192663	-1.19139	-0.344055	-0.149272	0.0749932	-0.813269	-0.527636	-0.0437751	-0.4741	-0.284552	-0.299606	-0.406456	-0.0889945	-0.20477	-0.108279	-0.0631827	-0.574306	-0.0625323	-0.693626	0.0360785	-0.211673	-0.397153	-0.122878	-0.256654	-0.0761707	-0.0384781	-0.0172541	-0.234862	-0.730335	0.171328	-0.270418
chr1_15902401_15952898	-0.363498	-0.244528	-0.352264	0.745859	-0.404733	0.487273	-0.224098	-0.0368222	-0.679732	0.918348	0.315738	-0.530628	-0.0190839	-0.0250376	0.211881	1.74868	0.143303	0.533214	-0.115002	0.192521	-1.00054	0.365548	0.382025	-0.649515	-0.580135	-0.19332	0.0330422	0.181998	-0.328275	-0.685632	-0.602316	-0.288467	-0.344956	-0.264865	-0.216341	0.0400617	0.480817	1.05466	-0.564904	0.583089	-0.31329	-0.160956	-0.25619	-0.0420866	-0.133975	0.0207492	-0.600824	-0.33404	-0.514229
chr1_15952898_16003221	-0.39205	-0.266998	-0.352462	-0.255706	-0.372631	-0.111167	-0.288762	-0.161363	-1.11697	-0.135379	-0.92325	-0.322549	-0.687263	-0.0806966	-0.346962	-0.0587441	-0.474244	-0.211525	-0.659216	-1.00046	-0.864533	-0.539404	-0.632339	-1.14319	-0.579292	-0.171132	-0.334238	-1.03103	-0.398478	-0.404913	-1.08159	-0.414495	-0.516656	-0.319638	-0.364776	-0.407489	-0.682784	-0.203626	-0.429364	-0.505869	-0.363479	-0.277952	-0.21534	-0.181154	-0.409805	-0.247412	-0.881426	0.0431807	-0.195227
chr1_16003221_16053566	-0.0614168	-0.30461	-0.391019	-0.509264	-0.149355	-1.39623	-0.273925	0.354514	-0.385573	0.203457	-0.490309	-0.0865838	-0.243496	-0.231264	-0.340841	0.194188	-0.277945	-0.116917	-0.132944	-0.320042	-0.652371	-0.163245	-0.445633	-0.849575	-0.483397	-0.0225579	-0.375443	-0.258747	-0.461944	-0.267025	-0.377738	-0.221233	0.00112779	-0.11941	-0.374378	-0.0193893	-1.43835	0.0392513	-0.573257	-0.590005	-0.159779	-0.0502775	-0.296487	0.213235	0.0252102	-0.533539	-1.17224	-0.425087	-0.460941
chr1_16053566_16103988	-0.0924036	-0.01161	-0.0511095	0.155951	0.293001	-0.0190091	0.123533	-0.456878	-0.560688	-0.032435	0.0167865	0.0328014	-0.0112525	0.0643075	0.0780618	0.103191	-0.122373	-0.0613419	0.215375	0.135953	-0.465712	-0.18622	0.11691	-0.318874	-0.0777974	-0.0926597	0.000709501	-0.0995295	-0.0537586	0.248661	-0.323979	-0.0811187	0.270282	0.116331	0.240769	0.326061	-0.0199392	0.0179762	-0.0520357	0.203956	-0.151124	-0.0931052	-0.25472	0.022424	0.171725	0.0777338	-0.265134	-0.00847586	-0.12625
chr1_16103988_16154683	-0.606941	-0.672077	-0.410731	-0.876481	-0.464868	-0.808901	-0.69792	-0.52929	-0.674026	-0.388721	-0.658627	-0.441271	-0.872002	-0.64861	-0.69122	-0.636829	-0.379931	-0.979018	-0.577008	-1.51757	-0.733911	-1.17615	-1.35778	-1.1051	-1.02568	-0.800768	-0.593886	-1.2111	-0.655059	-0.722961	-0.318525	-0.656798	-0.20715	-0.2555	-0.795987	0.104912	-2.07847	-0.105589	-0.736234	-1.48834	-0.734076	-0.514809	-0.593936	-0.911798	-0.290543	-0.5275	-0.714606	-0.610777	-0.327285
chr1_16154683_16205214	-0.407271	-0.0247318	-0.0439502	0.678889	-0.136507	0.421135	-0.337767	0.123978	-1.41199	0.80533	-0.135339	-0.471901	-0.373836	-0.196795	-0.16026	1.63133	-0.321227	0.314453	-0.219956	0.165041	-0.819037	0.298818	-0.183022	-0.637609	-0.886091	0.0568652	-0.52408	0.230775	-0.292373	-0.416944	-0.0650171	-0.350296	-0.445	-0.595885	-0.317978	-0.459724	0.323964	1.05905	-0.249175	0.486767	-0.351849	-0.40981	-0.298394	-0.18578	-0.112654	-0.39278	-1.16873	0.0119925	-0.446493
chr1_16205214_16255555	-0.370832	-0.460594	-1.00477	-0.652333	-0.341321	0.0388948	-0.281501	-0.314407	-0.857674	0.0102862	-0.241922	-0.145803	-0.511986	-0.634401	-0.41622	0.683156	-0.24158	-0.438227	-0.205093	-1.16719	-1.02171	0.0209485	-0.198162	-1.1793	-0.949469	-0.28067	-0.643092	-0.498038	-0.468788	-0.450087	-0.234087	-0.432878	-0.489896	-0.408536	-0.639848	-0.0253456	-1.14612	0.0846287	-0.36326	-0.585197	-0.572039	-0.448783	-0.496385	0.00720273	-0.18211	-0.454939	-0.796298	-0.181922	-0.303073
chr1_16255555_16305663	0.327895	0.485138	0.710052	1.2714	0.122453	1.03464	0.274959	0.137206	-0.438197	0.678437	0.708216	0.0893588	0.441212	0.781724	0.468376	1.53454	0.674604	1.11751	0.163646	0.242768	-0.377581	0.848455	0.594142	0.166167	0.462821	0.297207	0.721966	0.819098	0.164146	0.00868046	0.220094	0.237001	0.357391	-0.0578621	0.326825	0.0344556	0.870314	0.914809	0.0362248	1.30274	0.435356	0.144818	0.26698	-0.756899	0.0100861	0.188496	-0.27276	-0.420727	0.177156
chr1_16305663_16355852	-0.088353	-0.284943	0.286757	0.0130237	0.234315	0.122749	-0.124216	-0.436078	-0.476386	-0.213863	0.379017	-0.1332	-0.073236	0.128688	0.0425046	-0.783556	-0.204501	0.595637	0.0992752	-0.706808	-0.433526	0.015378	-0.130805	-0.198004	-0.0205161	-0.215344	0.199065	0.371518	-0.0354642	-0.490099	-0.168428	-0.0420901	0.0685658	0.0518441	-0.260195	-0.141433	-0.28334	-0.114738	-0.0620291	0.145312	0.119585	-0.0717256	0.00738281	-0.177515	0.084934	-0.467205	-0.218157	0.0307327	-0.277403
chr1_16355852_16405912	-0.356589	-0.582738	-0.765906	-1.75199	-0.307315	-1.43962	-0.673477	0.308049	-0.865707	-1.02806	-0.574512	-0.314121	-0.437447	-1.14198	-1.14895	-2.40421	-1.13475	-1.011	-0.774269	-1.73781	-0.23879	-1.0998	-1.6822	-1.23014	-0.577562	-0.664104	-0.887937	-0.684084	-0.576752	-0.0739108	-0.738646	-0.668921	-0.765718	-0.328962	-1.10269	-0.141642	-2.33983	-1.45734	-0.505453	-1.75106	-1.19538	-0.374598	-0.435986	0.0247018	-0.128757	-1.11325	-1.33038	-0.249316	-0.758843
chr1_16405912_16456458	-0.31213	-0.670644	-0.544519	-0.416058	-0.151499	-1.26418	-0.320241	-0.790566	-0.83474	-0.764662	0.105333	-0.329188	-0.205864	-0.382756	-0.4044	-1.40984	-0.423296	-0.14272	-0.295414	-1.83545	-0.989384	-0.123028	-1.3004	-0.657514	-0.364074	-0.522048	-0.432297	0.0142837	-0.371741	-0.164142	-0.555872	-0.29504	-0.298292	-0.302524	-0.668191	-0.116088	-1.21076	-0.602184	-0.762185	-0.469572	-0.249116	-0.347017	-0.364462	0.0926691	-0.0273153	-0.673547	-0.844024	-0.273952	-0.245862
chr1_16456458_16506736	0.119528	0.159496	-0.139732	-0.182416	0.134148	0.221938	0.0766049	-0.0456868	-0.373991	-0.22661	0.0279979	0.0393385	-0.0298688	-0.00742014	-0.117598	0.153044	-0.565324	-0.0531225	0.0703874	-0.444439	0.215925	0.00802019	-0.216118	-0.588297	-0.0267465	-0.0296774	-0.0941501	-0.0877782	0.204429	0.0386546	-0.0950151	0.0677148	0.101607	0.192364	-0.160809	0.592377	-0.521193	0.111737	-0.201254	0.103527	-0.165137	-0.105437	-0.0494582	0.100417	0.753302	-0.252284	-0.612519	-0.0662224	-0.178994
chr1_16506736_16556907	0.168369	-0.0835991	-0.21382	-0.199719	-0.0304957	0.0806427	0.060214	-0.315195	-0.549025	-0.271376	-0.326368	0.171453	0.00809501	0.0213188	0.00236176	-0.0342673	-0.0576876	0.0239624	-0.188202	-0.556707	0.0147507	-0.149206	-0.285787	-0.554768	0.00847355	-0.130072	-0.318868	-0.186825	0.169833	0.154327	-0.104984	-0.0193147	0.0516351	0.232792	0.0295012	0.353455	-0.582001	0.184489	0.0896972	-0.337366	-0.143232	-0.0696752	0.234967	-0.120666	0.434394	-0.313292	-0.488901	-0.528377	-0.297693
chr1_16556907_16607083	0.0940605	0.342142	0.743179	1.08443	0.280735	0.73495	0.12576	0.358899	-0.272737	0.933301	1.18232	0.079872	0.163766	0.509539	0.298789	1.52666	0.4853	0.825764	0.38567	-0.110687	-0.113115	0.735802	0.619142	0.019913	-0.0650797	0.290133	0.53917	0.75917	0.129421	-0.0909353	0.381838	0.145801	0.153975	0.0932068	0.0767088	0.332919	0.120186	1.24291	0.0340609	1.05869	0.368738	0.107469	0.219152	0.113339	0.120521	0.157567	-0.0926572	-0.374834	0.202607
chr1_16607083_16657645	-0.229547	0.0702651	-0.621488	-0.321938	-0.0524448	-0.0259089	-0.260227	-0.645453	-0.69114	-0.102429	-1.48704	-0.0296242	-0.234891	-0.447929	-0.0560953	0.516963	-0.386173	-0.704687	-0.17614	-0.532775	-0.719909	-0.0745253	0.0149787	-0.677141	-0.955982	-0.276653	-0.588469	0.252222	-0.0440826	-0.31263	0.150214	0.00342111	-0.253498	-0.122438	-0.290038	-0.609471	-0.888694	0.296101	-0.180244	-0.298878	-0.167663	-0.255547	-0.306153	0.370933	-0.128145	0.0275212	-1.04107	-0.0575945	0.0844588
chr1_16657645_16708491	-0.522304	-0.305397	-0.639065	0.594821	-0.519039	0.371168	-0.69879	-0.390401	-1.1913	0.432076	-0.20416	-0.570521	-0.855994	-0.254069	-0.143566	1.12991	-0.302867	-0.069604	-0.289787	-0.304675	-0.671073	0.013421	-0.212077	-1.09767	-0.947982	-0.128271	-0.565655	-0.314274	-0.755465	-0.455645	0.16977	-0.563115	-0.256456	-0.489224	-0.414941	-0.532722	-0.03732	0.871248	-0.705867	0.085319	-0.15116	-0.472313	-0.679831	-0.412015	-0.32845	-0.148259	-0.794644	-0.487973	-0.449223
chr1_16708491_16758877	-0.126974	-0.258578	-0.739726	-0.419864	-0.0222042	-0.317301	-0.0865354	-0.767459	-0.481697	-0.293939	-0.484664	-0.428292	-0.376489	-0.174426	-0.66432	0.172022	-0.209534	-0.609709	-0.0378728	-0.478756	-1.09233	-0.768185	-0.156831	-0.73086	-0.692362	-0.122432	-0.460716	-0.666601	-0.515278	-0.329498	-0.276183	-0.135521	-0.0421585	0.0683711	-0.25522	0.00968975	-0.805916	0.109623	-0.310697	-0.343962	-0.442975	-0.306431	-0.384065	-0.298617	-0.0627585	-0.0544481	-0.747894	-0.0510555	-0.0908455
chr1_16758877_16809149	0.02835	0.142804	-0.253687	0.243681	-0.160215	0.142678	-0.170828	0.308193	-0.360756	0.0561972	-0.144666	-0.101974	-0.296773	0.0179537	-0.0689686	0.350055	-0.000445018	-0.0156214	0.0669954	-0.372155	-0.313721	0.190254	0.192856	-0.668866	-0.354305	0.0148728	-0.00512229	-0.0047728	-0.154825	0.165653	0.1553	-0.0928102	-0.0769936	-0.00107166	-0.287449	-0.141748	-0.767486	0.371255	-0.535292	-0.157568	0.0594935	-0.137951	-0.22348	0.0466618	-0.011651	-0.162118	-0.530673	-0.0204994	-0.0951047
chr1_16809149_16859300	-1.27129	-1.39308	-1.39962	-0.659418	-1.06789	0.129627	-1.00257	-0.104043	-1.84489	-0.273921	-0.811886	-1.23645	-1.13098	-1.14584	-1.28728	0.334536	-0.741338	-0.391448	-1.08568	-1.4015	-1.57629	-0.814647	-0.862304	-1.24531	-1.51013	-0.823235	-1.04303	-0.741109	-1.12023	-1.02715	-1.13709	-1.11077	-1.00243	-1.53938	-0.951993	-1.26139	-0.577436	-0.0798505	-1.40042	-0.385153	-1.21383	-1.10478	-1.04007	-0.484886	-1.15698	-0.925457	-1.66568	-0.810059	-1.22161
chr1_16859300_16909880	-1.65647	-1.31074	-1.42601	-1.48607	-1.40693	0.275733	-1.29605	0.127093	-2.03424	-0.704403	-1.43223	-1.66025	-1.31358	-0.467911	-1.61071	-1.69052	-1.66571	-0.946122	-2.16359	-0.574106	-1.43876	-1.7056	-1.38917	-1.80103	-1.35535	-1.94355	-1.44558	-1.58354	-1.67664	-1.63595	-0.769473	-1.79274	-1.36141	-1.27304	-1.64307	-2.48038	-0.256308	-0.290519	-2.59418	-0.27741	-1.59177	-1.82549	-1.73563	-0.655178	-1.67084	-1.34502	-1.98468	-1.78016	-1.29339
chr1_16909880_16959905	0.0474936	0.412131	0.711451	1.73497	0.126237	1.27537	0.752878	0.816695	0.0199327	0.235552	1.43849	0.473457	0.837928	1.04978	0.878065	1.5129	0.481183	1.23898	0.305266	0.505313	-0.724524	1.26707	0.756532	0.499567	0.482227	-0.120925	1.02774	1.21121	0.234445	0.241141	0.587749	0.0319016	0.13478	0.0944864	0.743407	0.115347	2.09612	0.517678	-0.162788	1.98755	0.34465	0.357403	0.171476	0.624163	0.225174	0.388132	0.275147	0.277947	0.616858
chr1_16959905_17011838	-1.8756	-1.58206	-1.18711	-1.19178	-1.46099	-0.324676	-1.49164	-0.149431	-1.53164	-0.687742	-0.842894	-1.41988	-1.66248	-1.3016	-1.425	-0.772255	-2.84201	-1.2022	-1.56349	-1.29564	-1.3284	-0.778934	-1.37418	-1.84117	-1.60586	-1.54893	-0.723178	-0.905567	-1.79382	-1.76658	-1.03076	-1.69716	-1.87147	-1.75247	-1.58505	-1.95791	-1.20809	-0.995464	-1.86134	-0.722252	-1.08594	-1.74123	-2.10973	-0.336749	-1.50401	-1.31499	-1.31485	-1.50019	-1.58368
chr1_17011838_17062596	0.382705	0.134595	0.4066	1.10826	0.362856	1.8463	0.621496	1.67794	-0.587265	1.67082	0.47897	0.182038	0.177866	1.18232	0.26446	1.05857	0.314616	0.609561	0.633409	1.37869	0.11069	0.748663	0.577377	0.288333	0.709893	0.349498	0.841858	0.748048	0.83138	0.807309	0.596092	0.306846	0.295196	0.0551851	0.658026	-0.472013	0.693885	1.62627	-0.230351	1.10529	0.493798	0.821029	0.477842	0.870233	0.40152	0.830904	-0.251484	0.204008	0.462408
chr1_17113096_17213669	-2.26208	-2.12806	-0.730596	-1.47671	-2.32355	-1.95181	-2.55609	-1.5065	-2.99574	-2.52773	-1.62611	-2.58526	-2.48577	-1.95424	-2.06482	-0.582878	-1.54123	-1.67595	-1.84888	-2.40198	-2.0979	-1.45336	-1.2793	-1.92131	-2.23048	-2.18939	-1.60762	-1.39539	-3.19598	-3.48371	-1.43655	-2.27235	-2.59759	-2.3841	-2.31829	-2.10883	-2.59809	-1.45135	-2.05598	-0.537604	-1.96827	-2.37459	-2.14957	-1.76115	-2.31538	-2.58607	-2.61587	-1.87871	-2.44366
chr1_17213669_17263835	0.148832	-0.263988	1.02646	0.311442	0.121449	-1.01057	-0.0572814	-0.095278	-1.08707	-0.331119	0.926244	-0.32283	-0.102786	-0.974832	0.327948	-0.278146	0.214731	0.349496	-0.0453354	-0.946392	-0.898828	0.534768	-0.055603	-1.07843	0.0210227	0.0953187	0.11016	0.521995	-0.247324	-0.349484	-0.753238	0.223359	0.470786	0.105343	-0.707731	0.0957688	-0.487373	0.318082	-0.271384	0.510073	0.00947238	-0.305083	0.25653	0.171054	-0.283369	-0.480863	-0.990714	-0.0575047	0.253336
chr1_17263835_17314061	-0.380378	-0.345202	0.0528581	-0.0647919	0.0442821	-0.294891	-0.482662	0.327086	-0.767369	0.468513	-0.368363	-0.255066	-0.493491	-0.226683	-0.33935	0.034593	-0.703238	-0.380823	-0.0345232	-0.23474	-0.529273	-0.12664	0.00303665	-0.735908	-0.547996	0.00412733	-0.433681	-0.246012	-0.151297	0.033154	-0.175133	-0.128529	-0.430854	-0.452019	-0.412901	-0.305422	-0.752285	0.462616	-0.269473	-0.310857	-0.388331	-0.301022	0.072335	0.256084	-0.324894	-0.287373	-0.62753	-0.595082	-0.0973348
chr1_17314061_17364382	-0.272354	-0.0844915	0.33505	0.407746	-0.325149	-0.359371	-0.146087	0.34848	-0.56446	0.0594871	0.316	0.0456066	-0.168531	0.176546	0.411241	0.690907	0.308443	0.590957	0.0232525	-0.588979	-1.09235	0.336144	-0.195489	-0.212012	-0.191652	-0.224316	0.360867	0.301745	-0.468347	0.419192	-0.148981	-0.161708	0.00564269	-0.0901549	-0.178817	-0.18371	0.405184	0.231856	-0.229807	0.544388	0.218806	-0.0343565	-0.297342	-0.0380062	-0.0110455	-0.216293	-0.260785	-0.067323	-0.492296
chr1_17364382_17414535	0.10004	-0.179181	0.519768	-0.261575	0.148541	0.183273	-0.0166948	0.239569	-0.105334	-0.0805636	0.429858	0.131093	0.144516	0.0575416	0.18787	0.532279	-0.34422	0.0113308	0.178394	-0.725587	0.0115258	0.27039	-0.156847	-0.353219	0.0903333	0.129127	-0.0614169	0.232967	0.192864	-0.367666	0.0220914	-0.0256578	0.216836	0.265968	0.0396518	0.20002	-0.408867	0.0855327	0.0565616	-0.0787245	0.198537	0.109265	-0.0897738	0.00652	0.196577	-0.225365	-0.409762	-0.163257	0.311818
chr1_17414535_17464836	0.0131065	-0.0524798	-0.208918	-0.719305	0.327272	-0.711246	-0.222075	-0.109229	-0.429277	-0.298382	-0.536808	0.121312	0.0235717	-0.0944621	-0.34242	-0.777444	0.0475012	-0.521661	-0.221498	-1.08283	-0.993184	-0.355616	-0.680616	-0.555835	-0.177306	0.0977668	-0.203514	-0.797518	-0.284594	0.142414	0.0570999	-0.224068	0.160985	0.00496807	-0.348449	0.119693	-0.758456	-0.470244	-0.260875	-0.691064	-0.200277	-0.0950273	-0.0129395	-0.248005	0.331143	-0.394931	-0.771345	-0.598885	-0.274678
chr1_17464836_17514989	-0.0136397	0.232359	0.391594	0.21805	-0.00869111	0.240295	-0.217961	-0.0898108	-0.299404	-0.283033	0.365027	0.242713	0.0592135	0.0427737	-0.0523099	0.191148	0.343295	0.350801	-0.0411042	-0.833416	-0.330414	0.181507	-0.503541	-0.59812	0.368024	-0.18083	-0.315186	0.548809	0.154408	0.335321	-0.569133	-0.0586184	0.197734	-0.0400604	-0.189026	-0.00719437	-0.228037	-0.465724	-0.279006	0.186741	-0.103889	0.0452243	0.396784	-0.229834	-0.0819508	-0.338109	-0.493087	-0.107433	-0.0911466
chr1_17514989_17565056	0.140773	-0.194915	-0.10066	-0.780779	0.428194	-0.179927	-0.0145166	-0.233827	-0.320143	-0.116129	-0.922129	0.42085	-0.364957	-0.38827	-0.177157	-1.72013	-0.788564	-0.463638	0.0880609	-0.742821	-0.0910106	-0.680393	-0.488409	-0.594758	-0.0671939	0.0987411	-0.83808	-0.521711	0.237712	0.185836	-0.181493	0.190638	-0.102048	0.22316	-0.188702	0.22399	-1.98846	-1.15758	-0.0223082	-1.56201	0.0453692	0.18841	0.220942	-0.696009	0.662506	-0.247974	-0.462726	-0.133888	-0.157154
chr1_17565056_17615225	0.000417514	0.0734242	-0.260123	-0.979638	0.18975	-0.106313	-0.222747	-0.114889	-0.19906	-0.441195	-1.05925	0.145283	-0.342993	-0.225209	-0.528124	-1.46924	-0.277678	-1.32289	-0.144289	-1.3681	-0.200361	-0.670286	-1.06935	-0.917179	-0.101497	-0.0272061	-0.985903	-0.876231	0.00446602	0.046271	0.148268	0.0349752	0.395748	0.298746	-0.343319	0.362163	-2.20256	-0.433372	-0.121592	-1.36162	-0.34586	0.165386	0.133782	0.582461	0.303932	-0.318158	-0.524771	0.145663	0.0995258
chr1_17615225_17665502	-0.384326	-0.0922634	-0.526537	-1.12104	-0.2793	-0.116733	-0.201046	-0.457189	-0.493034	-0.183943	-0.523758	-0.102265	-0.513161	-0.183579	-0.330931	-0.420889	0.0801987	-0.807873	-0.296687	-1.06026	-0.393288	-0.0438617	-1.08842	-1.14298	-0.602188	-0.157639	-0.626613	-0.476872	-0.418624	-0.0712256	-0.587545	-0.191597	-0.563448	-0.139741	-0.413437	-0.225957	-1.66283	-0.545013	-0.433314	-0.487051	-0.352884	-0.298016	-0.0164211	-0.172408	-0.233566	-0.223879	-0.596806	-0.614831	-0.419344
chr1_17665502_17715909	-0.181235	-0.142819	-0.424399	-0.73902	0.1363	-0.294841	-0.126374	0.180292	-0.331459	-0.347124	-0.441201	-0.15621	-0.236769	-0.260404	-0.50983	-0.981662	-0.441502	-0.621788	0.0391352	-0.906258	-0.44168	-0.379678	-0.54284	-0.833863	-0.502553	0.0833845	-0.276054	-0.707673	0.0288109	-0.368552	-0.484836	-0.129177	0.0733326	0.0754348	-0.287338	-0.336768	-1.56683	-0.113257	-0.43288	-1.04539	-0.295361	-0.149721	0.25288	-0.109938	-0.0595746	-0.195192	-0.931528	0.0232755	-0.657621
chr1_17715909_17766156	-0.0154983	-0.257701	0.126394	-0.314981	0.213947	-0.0814523	0.0212949	0.852021	-0.330366	-0.2666	-0.205282	-0.0776311	-0.105395	-0.186202	-0.158704	0.108975	-0.0988558	-0.139483	0.0817934	-0.222552	-0.314297	-0.205917	-0.135446	-0.942361	-0.259202	-0.0846727	-0.236924	-0.237793	0.116293	0.127305	-0.0360703	0.0925049	0.0396614	-0.0768009	-0.12564	0.144006	-0.93643	0.583825	-0.267034	-0.291934	-0.0303241	0.194242	0.177734	0.101168	0.179359	0.0412439	-0.382112	0.134714	-0.260199
chr1_17766156_17817122	-0.328839	-0.263906	-1.47493	0.00560166	-0.327305	0.327178	-0.695714	0.760494	-0.507282	0.114526	-1.40455	-0.341511	-0.893607	-0.0667534	-0.703373	0.342396	-0.376078	-0.990345	-0.339316	-0.0466359	-0.996221	-0.273689	0.0396866	-0.983275	-0.855369	-0.256793	-1.08861	-1.57929	-0.147912	-0.465771	-0.204786	-0.402112	-0.299687	-0.181067	-0.325525	-0.472597	-0.433215	0.76627	-0.278804	-0.155322	-0.580793	-0.343916	-0.401079	0.710608	-0.263068	-0.0220157	-1.03397	0.203218	-0.504188
chr1_17817122_17867620	-0.238993	-0.182388	-1.24215	0.258895	-0.00708531	0.527308	-0.224397	0.666582	-0.347689	0.531603	-0.71012	-0.197653	-0.555901	-0.135205	-0.419384	0.68027	-0.33572	-0.853414	0.00567205	0.113706	0.142643	-0.22994	0.0077425	-1.02134	-0.660761	0.121012	-0.869108	-0.625039	-0.515428	0.0394097	0.491074	-0.164352	-0.167865	0.0878874	-0.335932	0.410184	-0.78521	1.25574	-0.127588	-0.376243	-0.414683	-0.133897	0.101191	0.580537	0.308506	-0.101963	-1.06252	0.407841	-0.434014
chr1_17867620_17917784	0.121625	-0.174413	-0.484489	-0.703978	0.106081	-0.972359	-0.231978	0.442588	-0.154848	-0.552105	-0.735256	0.0575654	-0.101894	-0.311998	-0.354258	-0.856861	-0.123402	-0.928319	-0.281003	-0.861778	-0.197436	-0.350184	-1.11857	-0.949235	-0.241395	-0.116897	-0.7728	-0.938691	0.127288	0.184458	-0.495028	0.311333	-0.0455062	0.282779	-0.47155	0.834583	-1.20212	-0.853984	-0.208693	-0.929132	0.196981	0.114983	0.359401	0.0936285	0.822553	-0.460463	-0.589448	0.330836	-0.0301467
chr1_17917784_17967902	0.280784	-0.0825982	0.0575699	-0.70458	0.401762	-1.23048	0.0438559	-0.0141036	0.082093	-0.462526	0.272143	0.0966972	0.0210593	-0.422216	-0.21995	-1.61527	-0.0486346	0.098351	0.148784	-1.42622	-0.488435	-0.0463235	-0.615012	-0.509218	0.421165	0.222835	-0.0118724	0.090201	-0.0573168	0.210534	-0.123238	0.0599412	0.0708015	0.63094	-0.162931	0.374189	-1.16588	-1.04116	0.147892	-0.697897	0.046894	0.153403	0.255638	0.237282	0.503626	-0.362481	-0.202992	0.174377	0.200566
chr1_17967902_18017948	0.204923	0.0201056	0.532095	-0.525121	0.235022	-1.28525	0.0422881	0.242273	-0.0554481	-0.334204	0.218569	0.347178	0.296571	-0.332351	-0.0634819	-1.61975	-0.0961823	0.144314	-0.0304339	-1.30788	-0.294152	0.0568072	-0.960505	-0.66025	0.328516	-0.196559	0.0791228	0.409216	-0.0352609	0.338991	-0.0745737	0.10807	0.0652939	0.380317	-0.156937	0.243093	-0.903725	-1.1314	-0.0541441	-0.384043	0.277068	0.244787	0.179809	-0.354224	0.430708	-0.587592	-0.434556	0.241163	-0.0259098
chr1_18017948_18068152	0.0695896	0.192581	-0.224424	-0.347145	-0.00807134	-0.069987	-0.0952715	-0.288382	-0.340722	0.165524	-0.692383	0.157289	-0.135612	0.0286892	-0.326728	-0.394862	-0.0245266	-0.58161	0.0188092	-0.442278	-0.577467	-0.534864	-0.272839	-0.339756	-0.104946	0.0533363	-0.66546	-0.521982	0.118191	0.311246	0.308084	0.153409	0.0433212	-0.0435602	-0.165316	-0.0571935	-0.930758	0.0531967	-0.111932	-0.617218	0.0744455	0.0958364	0.132483	-0.347543	0.0968635	-0.0997433	-0.676313	-0.0740843	0.358371
chr1_18068152_18118231	-0.0338794	-0.173607	0.128097	-0.231845	-0.0531875	-0.50711	-0.130299	-0.268977	-0.278751	-0.0264999	0.0658408	-0.170108	-0.0251011	-0.258197	-0.135116	-1.41296	0.250781	-0.253108	0.151207	-0.680592	-0.441181	-0.0454088	-0.628636	-0.48723	0.106731	0.267966	-0.299158	0.118089	0.250146	-0.103103	-0.0208687	0.0719891	-0.0580602	-0.0211124	-0.283501	-0.126283	-1.50961	-0.429007	-0.0788726	-0.479501	0.168982	0.107081	0.0869634	0.365767	0.0241071	-0.137483	-0.503505	0.171683	-0.0815183
chr1_18118231_18168262	0.0794848	-0.149599	0.318916	-0.429754	0.0212537	0.0609261	-0.302448	-0.0950676	-0.583163	-0.102577	-0.0188698	-0.0122447	-0.0284386	0.179198	0.0735191	-0.591259	0.254927	-0.283586	0.0688358	-0.538753	-0.827233	0.425244	-0.482073	-0.587292	0.208534	0.0542049	-0.307487	0.140857	0.221899	-0.127026	-0.591014	0.0914927	0.0892565	-0.155189	-0.238169	-0.624792	-1.36474	-0.353836	0.0600785	-0.177441	0.21349	-0.0551649	0.133498	-0.615549	0.0138186	-0.0418482	-0.992918	0.273412	-0.117415
chr1_18168262_18218405	0.165549	0.0448556	-0.128296	-0.503478	0.473329	-0.863846	0.0186364	-0.265775	-0.323259	0.0196863	-0.765836	0.275207	-0.0382299	-0.184929	-0.450921	-0.662603	-0.536152	-1.00958	0.212918	-0.39083	-0.577723	-0.138639	-0.206656	-0.388134	0.238598	0.204497	-0.53152	-0.111312	0.505393	0.26452	0.351213	0.159768	0.101112	0.151848	-0.0295018	-0.20636	-1.48106	-0.536156	0.17756	-0.450302	0.00447654	0.264211	0.35255	-0.282453	-0.354796	-0.171953	-0.409401	0.267461	0.135673
chr1_18218405_18268502	0.130936	-0.0168957	-0.641852	-0.189657	0.324422	-0.13863	0.0521475	0.366236	-0.227143	0.209391	-0.728102	-0.00444337	0.0991603	-0.148244	-0.198822	-0.833755	0.170801	-0.586845	0.0833703	-0.815363	-0.730544	0.0296286	-0.695188	-0.416211	0.261086	-0.0198256	-0.155508	-0.58425	0.27773	0.448313	-0.163012	-0.101031	0.344524	0.277644	-0.133425	-0.414088	-1.18503	-0.353462	-0.171201	-0.682726	0.10876	0.0958268	0.170872	0.142546	-0.223635	-0.175066	-0.173174	0.0654846	-0.235483
chr1_18268502_18318553	0.0969152	0.180381	-0.449023	-0.335473	0.434605	0.237348	0.438561	0.272167	-0.244017	-0.0745735	-1.48337	0.503977	0.343354	0.274242	-0.0617134	-0.588353	0.061237	-0.622057	0.437858	-0.612121	-0.195655	-0.193224	-0.746714	-0.299174	0.454927	-0.0459377	0.131958	-1.24283	0.466051	0.397297	0.300474	0.40879	0.476099	0.288171	-0.0372542	0.219073	-0.781094	-0.192096	0.105994	0.000216876	0.300028	0.436402	0.592	-0.0722175	0.365573	0.0755102	-0.0258133	0.549163	0.13194
chr1_18318553_18368614	0.357849	0.213811	-1.3852	-0.29234	0.578966	-0.528388	0.140683	-0.104983	-0.169898	0.22306	-0.648685	0.365268	0.231794	0.103595	0.045845	-0.545857	0.0230921	-0.566974	0.310441	-0.653445	-0.440545	-0.222443	-0.561686	-0.126668	0.249068	0.454311	-0.818884	-0.792666	0.438844	0.542062	0.100035	0.412185	0.383697	0.183193	0.120131	0.0957455	-0.863332	0.00584626	0.035084	-0.299828	0.239173	0.310776	0.397392	0.270274	0.133594	0.300906	-0.120614	-0.053681	0.162094
chr1_18368614_18418721	0.174303	0.30983	-0.104185	-0.611547	0.300572	-0.0464198	-0.0760954	-0.392275	-0.192545	0.154405	-0.477985	0.350948	0.191604	-0.0434722	0.0161796	-1.85318	-0.00108509	-0.592283	0.153649	-0.932542	0.00197691	-0.075905	-0.550408	-0.529826	0.331738	0.167566	-0.528013	-0.489457	0.14408	0.335705	0.0819384	0.191221	0.155694	-0.0673959	-0.191049	0.131978	-1.6434	-0.285136	-0.096396	-0.95633	-0.0122093	0.280733	0.153192	0.254934	-0.130185	-0.0228897	0.285573	-0.092321	0.104465
chr1_18418721_18469535	0.103165	0.158396	-0.888423	0.104469	0.0943479	0.611457	-0.14707	0.948443	-0.342321	0.669989	-1.10959	0.146079	0.0886317	0.265706	-0.080103	0.607131	-0.189714	-0.524747	0.186102	-0.157207	-0.652694	-0.190319	-0.549924	-0.515873	0.0240644	0.187784	-0.367363	-0.246621	0.375546	0.54105	0.628121	0.246634	0.0678633	0.0865725	0.0881708	-0.122942	-0.599217	0.811692	-0.113056	0.0369157	-0.32538	0.368939	0.361546	0.65343	0.104389	0.0419337	-0.480883	0.199338	0.21934
chr1_18469535_18519704	-0.0482088	0.194672	-0.621468	-0.544745	0.135634	-0.626614	-0.0611323	0.43006	-0.562035	-0.281075	-1.1751	0.333791	-0.41156	0.0480739	-0.190444	-1.09028	-0.198312	-0.854611	-0.0758815	-0.685348	-0.441288	-0.536689	-0.587756	-0.402691	0.0434139	0.279824	-0.537116	-1.23263	0.00136094	0.175725	0.105176	0.0650844	-0.10052	-0.212913	-0.183694	-0.0949438	-1.83803	-0.503115	-0.14474	-1.06277	-0.0231353	0.223423	0.164477	-0.0187947	0.291791	-0.456845	-0.647476	-0.426445	-0.0567734
chr1_18519704_18569712	0.13285	0.186387	-0.260756	-0.533196	0.384308	0.199698	0.196092	0.312059	-0.345846	0.193118	-0.536725	0.479873	0.245593	0.0711055	0.143961	-0.325317	0.428902	-0.229937	0.176638	-0.925547	-0.148053	-0.00514252	-0.00987171	-0.376641	0.392078	0.463491	-0.178972	-0.641364	0.261576	0.650797	0.296634	0.34491	0.331902	0.270109	0.131218	0.322152	-1.30339	0.0751298	0.0122408	-0.440276	0.143708	0.433221	0.507417	0.463239	0.0689039	0.159062	-0.580288	0.376044	0.158753
chr1_18569712_18619972	0.114563	-0.220563	-0.362738	-0.430329	-0.0533142	-0.114829	0.156784	-0.268152	-0.121108	-0.267846	-0.589464	0.282538	0.172451	0.103943	-0.0106626	-1.48595	-0.312191	-0.768653	-0.0453412	-0.673492	-0.145985	-0.585696	-0.520605	-0.404901	0.442391	0.000147785	-0.454359	-0.19216	0.296339	0.300656	-0.491983	0.202706	0.363824	0.221695	-0.0968499	-0.110486	-1.36936	-0.26331	0.322932	-0.490406	0.116893	0.174275	0.210513	-0.0777346	0.142644	-0.0251783	-0.419796	0.0107598	-0.105453
chr1_18619972_18669979	0.185337	0.422204	0.26319	-0.245517	0.406738	0.165074	0.219705	-0.260438	-0.606243	0.126726	-0.786475	0.201909	0.442749	0.208284	0.0630751	-1.41872	0.0479918	-0.555339	-0.0371671	-0.533626	0.00584909	-0.207927	-0.270408	-0.192001	0.257683	0.237186	-0.0719851	-1.15558	0.515287	0.513239	0.51362	0.479651	0.34572	0.336815	-0.0207709	0.114462	-0.706039	-0.382487	0.116815	-0.449891	-0.194321	0.364582	0.719317	-0.120451	0.153981	0.0796855	-0.335369	0.261065	0.196033
chr1_18669979_18720303	-0.236445	-0.181334	0.329382	0.0304341	0.161932	-0.268626	-0.211675	-0.0935957	-0.318162	0.0130011	0.247119	-0.0586991	-0.00662949	0.0203111	0.0604928	-0.876732	-0.082805	-0.0706521	0.173124	-0.798582	-0.314519	0.192104	-0.47925	-0.540873	0.168508	0.0497634	0.0763112	0.0955604	0.196869	0.142507	0.00484885	-0.0166255	0.140566	-0.168983	-0.0831805	-0.221636	-0.8102	-0.515871	0.251205	0.175288	0.126781	0.129694	-0.17149	-0.202186	-0.203902	-0.136033	-0.503746	-0.106626	-0.634752
chr1_18720303_18770361	-0.0744632	-0.0304111	-0.57433	-0.78116	0.133815	0.288997	-0.0216706	-0.145677	-0.399967	-0.466745	-0.732304	0.0395632	0.0939817	-0.00771016	-0.0178476	-0.890668	-0.716021	-0.414719	0.129555	-0.701864	-0.588656	-0.114642	-0.551786	-0.247968	0.0580236	-0.0469017	-0.618972	-0.523173	0.117603	0.0268484	-0.323531	-0.0179507	0.00490314	0.251033	-0.328905	-0.193909	-1.69833	-0.608097	0.150209	-0.379583	0.107592	0.100244	0.176459	-0.0390413	0.056511	-0.0738127	-0.451484	0.150077	0.226332
chr1_18770361_18820596	-0.132647	-0.146346	-0.0178404	0.0977125	0.189542	0.0514912	-0.116054	0.185271	-0.355385	0.43247	-0.448644	-0.113162	-0.026087	0.192213	-0.161665	0.538779	0.318482	-0.372087	0.12907	-0.278732	-0.730675	-0.231602	0.10258	-0.371625	-0.0724677	0.269349	0.304434	0.00512912	0.0490843	0.0448354	0.0527326	0.227861	0.093735	0.0755502	-0.104329	-0.019388	-0.0303282	0.201233	0.23623	0.46936	-0.187742	0.134887	0.38326	0.036805	-0.106479	0.211771	-0.236205	-0.138346	0.136377
chr1_18820596_18870913	0.131178	0.561526	-0.0568379	0.448742	0.293564	0.0598818	0.186321	-0.0168774	-0.104313	0.0360961	-0.141581	0.111408	0.245089	0.0749289	0.149607	0.300875	-0.186924	-0.0285303	0.15948	-0.540204	-0.199915	0.15796	-0.232537	-0.330753	0.275551	0.116758	-0.234178	-0.00925867	0.405753	0.363635	0.237887	0.294037	0.541564	0.231097	-0.109707	0.170784	-1.03925	0.121795	-0.111749	-0.0644274	0.294523	0.264914	0.292765	0.572052	0.201466	-0.0451958	-0.348933	0.414969	0.212377
chr1_18870913_18921268	0.198514	0.0313199	0.146105	-0.225325	0.107458	-0.0863729	-0.11344	0.23891	-0.0652026	-0.206369	-1.35409	-0.00261887	0.0101704	-0.158272	-0.0814449	-1.01923	-0.469888	-0.381551	0.223321	-0.828904	-0.577273	-0.398151	-0.259717	-0.42223	-0.110775	0.30243	-0.521036	-0.478884	0.319129	0.26869	0.21611	0.0978336	0.030253	0.0887946	-0.179154	0.176759	-1.91163	0.18769	-0.219997	-0.706187	-0.116627	0.18486	0.229076	0.520111	-0.204981	-0.146647	-0.675409	0.253759	0.190492
chr1_18921268_18971404	-0.303476	-0.404941	-0.5562	-0.117549	-0.100255	-0.432225	-0.31134	-0.213543	-0.714482	0.226797	-0.613457	-0.223428	-0.449968	-0.189056	-0.163894	0.438126	-0.350925	-0.399448	0.0595157	-1.03861	-0.900133	-0.152956	-0.185908	-0.963414	-0.245633	-0.0399827	-0.40428	-0.332627	-0.417469	-0.110169	0.280234	-0.151716	-0.10795	-0.302416	-0.437282	-0.608965	-0.686564	0.10709	-0.268403	0.269423	-0.58405	-0.127807	0.0363534	-0.743822	-0.385876	-0.250747	-0.530189	-0.0837442	-0.246057
chr1_18971404_19021461	0.0706231	-0.213504	-0.0730506	-0.949153	0.0522895	-0.765879	-0.288062	-0.2845	-0.614034	-0.583365	-0.46523	-0.0573708	-0.435586	-0.237747	-0.280099	-1.03526	-0.901004	-0.667317	-0.0988517	-1.45772	-0.377004	-0.476733	-1.01192	-0.850427	-0.14229	0.0394483	-0.45223	-0.481068	-0.0314905	0.091447	0.423964	-0.0751755	-0.0383438	-0.196686	-0.410405	-0.257553	-1.97867	-0.581255	-0.229889	-1.14458	-0.785656	0.0195865	0.164498	-0.0625033	-0.10121	-0.156607	-0.964858	-0.143584	-0.126376
chr1_19021461_19071573	0.0937717	-0.0458092	-0.0118548	0.22214	0.214235	0.733566	0.0157869	0.617256	-0.33032	-0.166924	-0.105185	0.205981	-0.0744173	0.0797491	-0.004747	-0.464772	-0.232285	-0.0734659	-0.00249669	-0.636374	-0.199441	-0.192041	-0.908584	-0.598602	-0.066533	-0.169891	-0.189552	-0.0356938	0.197591	0.291789	0.128982	0.100533	0.0964737	0.00834862	-0.120979	-0.289669	-0.420305	-0.0711907	-0.0919941	0.0731438	0.230414	0.198421	0.0526795	-0.595155	0.0736561	-0.315829	-0.290269	0.0925285	0.128849
chr1_19071573_19121625	0.0613034	-0.166049	-0.170024	0.147738	0.0133164	0.281594	-0.23857	0.800318	-0.43589	-0.218948	-0.288728	0.160743	0.00355804	-0.0854582	-0.0594598	-0.138357	0.139839	-0.0485651	0.154534	-1.16873	-0.0477348	0.14379	-0.352429	-0.474095	0.267042	0.00339823	0.0935867	0.160983	0.043178	0.314099	0.187427	0.180598	0.346867	0.0899418	-0.125199	0.0541259	-1.26228	-0.537601	0.12501	-0.276792	0.231225	0.175401	0.0594261	0.261624	-0.159535	0.00533543	-0.148315	-0.00943036	-0.0747206
chr1_19121625_19171791	0.348173	0.155579	-0.363658	-0.764165	0.350853	-0.386549	0.183693	0.305808	-0.220651	0.0888576	-0.0931727	0.436745	0.108878	-0.103517	-0.440147	-1.09868	0.143794	-0.265674	0.302709	-0.750193	-0.50868	-0.130072	-0.927977	-0.363379	0.348158	0.14661	-0.234791	-0.787639	0.194892	0.142889	0.0592235	0.145653	0.308942	0.0754611	-0.000241678	0.2845	-1.95625	-0.433498	-0.10555	-1.04282	-0.0189461	0.213346	0.389055	0.185159	0.175041	0.0847539	-0.440701	0.345405	0.342406
chr1_19171791_19221901	0.31549	0.380646	0.429958	-0.112863	0.548788	-0.108281	0.210152	-0.578976	-0.0135706	-0.28219	0.463955	0.364155	0.317815	0.011474	0.152896	-0.112632	-0.0124287	0.477771	0.11136	-0.384573	-0.498559	0.17762	-0.102047	-0.211699	0.509978	0.037925	-0.0469358	0.664722	0.380605	0.555107	0.25106	0.240038	-0.0789606	0.0577755	-0.0487519	0.0139297	-0.814581	-0.662763	0.185762	-0.177408	0.405629	0.317115	0.175363	-0.47517	0.563891	-0.0120528	-0.518365	-0.124408	0.132168
chr1_19221901_19272020	-0.0274392	-0.372453	-0.4001	-0.784787	0.23315	-0.794688	-0.173705	-0.99053	-0.560417	-0.626799	-0.51106	-0.0059217	-0.349433	-0.322725	-0.473654	-2.00465	-0.402489	-0.437498	-0.514848	-1.02623	-0.248607	-0.204925	-1.2142	-0.951528	0.0737084	-0.666902	-0.211376	-0.968242	0.0109034	0.138578	-0.52594	-0.113046	0.0052236	0.0299297	-0.540017	-0.124867	-1.67928	-1.65765	-0.108654	-0.90356	-0.228994	-0.0392005	-0.0122543	-0.553432	0.270931	-0.578187	-0.69947	-0.0692694	-0.080355
chr1_19272020_19322112	0.241926	0.371768	-0.352069	0.131686	0.282726	0.414879	-0.00398332	0.692672	-0.452763	0.272795	-0.531844	0.0640982	0.0466665	-0.104802	-0.0607254	0.0473821	0.0702601	-0.243726	0.0757339	-0.533188	-0.0918132	0.156061	-0.0548395	-0.396755	0.176247	-0.158878	-0.184497	0.102371	0.000213055	0.164471	-0.290647	0.0653901	0.062946	-0.0234195	-0.103971	0.252727	-0.415421	0.0675253	-0.128818	0.0269421	0.271637	0.0511581	0.360584	0.221603	0.338341	0.132517	-0.270455	0.00399316	-0.0124447
chr1_19322112_19372252	0.112618	-0.0152636	0.369127	-0.180557	0.0126323	-0.233855	-0.0910395	0.326778	-0.400868	-0.348128	0.269051	-0.168105	0.146057	0.149254	-0.105478	-0.271456	-0.0963641	0.430553	0.247089	-0.442757	0.265623	0.452988	-0.569948	-0.541006	-0.054111	0.0567102	0.134746	-0.138087	0.0789141	0.0270643	-0.104582	-0.16598	-0.085352	0.215649	-0.0445496	0.150837	-0.806406	-0.312961	-0.766164	-0.28481	-0.201979	-0.0686978	0.124408	0.0835327	0.29121	-0.214327	-0.453829	0.165078	-0.482074
chr1_19372252_19422293	0.385141	0.0969454	0.208274	-0.162296	0.347953	-0.534827	0.0509735	0.47727	-0.109657	-0.305925	0.127652	0.547884	0.200307	-0.227852	0.0934251	-1.0961	-0.129359	0.252143	0.189826	-0.867884	0.231267	0.329229	-0.543681	-0.180366	0.343948	-0.051686	0.1415	0.314478	0.0765488	0.119648	0.248564	0.192939	0.0451071	0.426461	0.081345	0.0788228	-0.61894	-0.935774	0.0846403	-0.454129	0.157413	0.332405	0.318748	-0.0846013	0.54975	-0.117882	-0.312951	-0.0118317	0.130985
chr1_19422293_19472314	0.114003	0.270792	-0.417338	-0.339623	-0.460346	0.0822576	0.0021558	-0.217401	-0.536655	-0.178454	0.0112608	-0.0422049	0.140445	-0.0216389	-0.256768	-0.465081	0.016577	-0.325396	-0.0312703	-0.819369	-0.411062	0.127863	-0.615059	-0.579576	-0.0380009	-0.0361628	-0.262827	-0.0906601	-0.00826681	-0.000610312	-0.04428	-0.0420371	0.0212881	0.0767308	-0.291	0.178561	-1.11014	-0.33528	-0.0273273	-0.219026	-0.17907	0.150614	0.222339	-0.149733	0.357165	-0.238085	-0.533479	-0.271163	-0.081191
chr1_19472314_19522454	0.445666	0.247223	0.0623083	-0.226817	0.0985076	0.364541	-0.240853	0.0607514	-0.240295	0.0283809	0.158623	0.175992	-0.131881	0.249954	0.188785	-0.317752	0.148815	-0.0865384	0.162235	-1.01086	0.0556799	0.016707	0.00395152	-0.850037	0.0854063	-0.113589	0.129807	-0.461897	0.230273	-0.0759892	-0.36775	0.100814	0.152018	0.318341	-0.181938	0.155471	-0.675316	0.0476348	-0.49826	-0.293835	-0.355034	0.00779397	-0.00813375	0.0289089	0.100613	-0.360033	-0.0836366	-0.123999	-0.0100257
chr1_19522454_19572670	0.0360056	-0.109103	-0.0712853	0.328081	-0.285681	0.114822	0.113455	0.0331269	-0.450023	0.578696	-0.668235	-0.0184226	-0.36039	0.122495	0.0972141	1.34874	0.0822383	-0.188805	0.15584	0.0133628	-0.436424	0.0751248	-0.138486	-0.491297	-0.196442	-0.0639249	0.134938	0.21035	-0.201874	0.217117	0.650741	0.218656	0.221156	0.0469123	-0.178033	0.103538	-0.124766	0.549939	0.230792	0.473315	0.292248	-0.0677253	0.0708386	-0.450594	0.121499	0.116241	-0.370577	-0.229145	0.0278039
chr1_19572670_19622849	-0.302103	-0.156328	-0.00526964	0.208577	-0.134597	0.0423949	-0.528619	-0.100052	-0.729821	0.184809	-0.112922	-0.197324	-0.422201	0.0270437	-0.416619	0.955717	-0.420608	-0.0501888	-0.35016	-0.307389	-0.260392	-0.12134	-0.0594561	-0.950754	-0.423168	-0.321071	-0.19891	0.321966	-0.463132	-0.720891	-0.201545	-0.277717	-0.297357	-0.330537	-0.294891	0.00760532	-0.417846	0.462095	-0.205922	-0.275644	-0.61048	-0.345568	-0.292289	-0.685483	-0.277608	-0.47579	-0.774984	-0.424921	-0.393128
chr1_19622849_19673154	-0.217953	-0.0101789	-0.296756	0.243143	0.0171753	0.837244	-0.211985	0.565544	-0.644798	0.671267	0.0358211	-0.286152	0.040389	0.226605	0.150907	0.73651	0.287434	0.147165	0.139527	0.197976	-0.645177	0.383903	0.269242	-0.0618355	-0.0284213	0.0127324	0.230046	0.292884	0.0223323	0.215073	0.156925	-0.227972	-0.205706	-0.145754	-0.16818	-0.046684	0.143583	0.959351	-0.196616	0.524962	-0.014329	0.182855	0.091286	-0.172747	-0.258992	-0.111413	-0.546045	0.102561	0.14888
chr1_19673154_19723273	0.108497	-0.0415841	0.395559	-0.241931	0.0945538	0.186486	-0.21167	-0.0537286	-0.265907	-0.293783	0.190692	-0.195785	0.128782	0.130875	-0.0674599	-0.967604	-0.0657453	-0.245074	0.0310993	-0.887873	-0.508579	-0.0145451	-0.595203	-0.339956	0.0960671	0.0125822	0.18116	0.110586	0.258188	0.400904	0.46448	0.159732	0.133188	0.251345	-0.116092	0.35143	-0.987531	-0.312282	-0.325716	-0.528256	0.232126	0.0370551	0.22358	0.0219187	0.258638	-0.297167	-0.664646	0.0544001	-0.201989
chr1_19723273_19773343	-0.0662509	0.338162	-0.55938	-0.334743	0.230266	-0.221301	-0.293085	-0.388097	-0.583955	-0.0826345	-1.48138	-0.0138428	-0.225323	-0.132581	-0.13941	-0.783256	-0.0867408	-0.337536	-0.0823889	-1.07069	-0.32802	-0.314973	-0.236273	-0.90373	0.0225477	0.103805	-0.353693	-0.830573	0.0477864	-0.0743499	-0.451373	0.238855	0.125256	-0.0412839	-0.342346	0.255025	-1.55627	-0.187817	-0.206943	-0.235093	-0.367685	-0.0366643	-0.0389468	0.214509	0.0684386	-0.428135	-0.875386	0.0277603	0.13022
chr1_19773343_19823789	0.0470756	0.0207452	0.233092	0.0307322	0.136119	-0.11779	0.0832715	0.0479165	-0.161372	-0.161302	-0.571193	0.213465	0.27531	0.181027	0.0511153	0.36915	-0.359001	-0.108901	0.334841	-0.402069	-0.0436563	-0.0907414	-0.15349	-0.316448	0.0173059	-0.030139	-0.217704	-0.0747546	0.232782	-0.185364	-0.0890624	0.0931626	0.148889	0.163023	-0.160889	0.56056	-0.841941	0.22435	0.12935	-0.104476	-0.134267	0.094832	-0.188542	-0.238091	0.574659	-0.408879	-0.575556	-0.0034484	-0.22253
chr1_19823789_19874471	0.0293183	-0.00847977	-0.515539	0.43649	-0.251552	-0.251565	0.101	0.115971	-0.317179	-0.292546	-0.0727406	-0.183223	-0.0940363	-0.136343	-0.245621	0.0812228	0.0146512	-0.776549	0.0391411	-0.49416	-0.591842	-0.171292	-0.114943	-0.722136	-0.280715	0.0616296	-0.26607	-0.617584	0.093356	0.318759	0.259815	-0.203536	0.00903722	-0.13914	-0.287415	-0.00762687	-0.784735	0.364232	-0.247357	-0.188323	-0.0690906	-0.181221	-0.162843	0.35277	-0.126558	-0.671141	-0.578588	-0.150558	-0.288376
chr1_19874471_19924760	-0.158223	-0.209678	0.0455229	0.161945	-0.0220103	-0.076416	-0.20795	-0.0737993	-0.519978	-0.0460529	-0.501522	0.034555	-0.422331	-0.0455252	-0.272261	0.769679	-0.129371	0.0933385	-0.0669641	-0.284474	-0.146591	-0.397086	-0.1168	-0.563302	-0.620463	0.0782674	-0.413804	0.138084	-0.464995	0.0214206	0.203196	0.0243241	-0.0434933	-0.0886378	-0.146936	0.188613	-0.877199	0.839499	-0.160694	-0.233204	-0.103276	-0.192191	-0.24386	0.0134866	0.07257	-0.0357944	-1.04313	0.156932	-0.454589
chr1_19924760_19975130	-0.0371947	-0.23871	-0.686474	0.358026	-0.284903	0.714735	-0.0570679	0.215447	-0.965005	0.303882	0.195037	-0.365865	-0.378436	0.0117235	-0.189672	0.907403	0.192357	0.188293	-0.205639	-0.284365	-0.377511	0.00481639	-0.472411	-0.587362	-0.389023	-0.252779	-0.269268	0.459942	-0.63478	-0.319389	-0.33642	-0.171164	-0.133566	-0.162513	-0.188043	0.442832	-0.410027	0.534936	-0.234588	-0.232958	-0.325412	-0.330245	-0.243798	-0.377573	0.0725501	-0.270888	-0.661297	-0.613101	-0.101051
chr1_19975130_20025488	-0.0991442	0.308003	-0.0673204	0.549013	0.248943	0.930826	0.0645365	-0.0319399	-0.395668	0.74983	0.056562	0.162255	0.149044	0.408775	0.059778	0.64406	0.548732	0.142469	0.431917	0.473658	-0.57199	-0.0787249	0.447316	-0.303575	0.129262	0.055341	0.112979	0.0021999	0.293694	0.280794	0.485551	0.0307268	0.121796	-0.014033	0.109378	0.0842554	-0.188423	1.07042	0.0981607	0.472214	0.0248146	0.187732	0.353859	0.230769	0.0767789	0.0619244	-0.269411	-0.103493	0.516309
chr1_20025488_20075787	0.240165	0.376168	-0.331675	-0.429109	0.396306	0.633241	0.0439395	0.0485893	-0.162025	-0.0336873	-0.866958	0.213584	0.0142104	0.234028	0.0587543	-0.205494	0.0532601	-0.573511	-0.0051359	-0.40288	-0.579622	-0.0963207	-0.420243	0.073392	-0.0145784	0.206901	-0.513211	-0.356768	0.0480347	0.0671922	0.00521511	0.282245	0.147538	0.314134	0.32784	0.28707	-1.13103	-0.000299358	-0.375361	-0.317551	-0.137457	0.324634	0.259484	-0.57965	0.101593	0.0285437	-0.0633877	0.317001	0.00778852
chr1_20075787_20126007	0.145949	0.343894	-0.724725	-0.16092	0.427493	0.223156	0.0320625	-0.401771	-0.508705	0.218868	-0.213984	-0.000287474	-0.136694	-0.122033	-0.0444233	-0.349689	0.00784342	-0.645047	-0.116538	-0.531008	-0.25443	0.0242313	-0.703069	-0.529318	-0.337514	0.204813	0.01178	-0.644541	0.127912	-0.0942743	0.119884	0.004056	0.105827	0.00142579	-0.189012	0.766421	-1.31893	0.313978	-0.0599428	-0.721544	-0.21317	0.098349	0.116381	-0.150505	-0.0011616	-0.0225822	-0.386187	-0.0975659	0.241682
chr1_20126007_20176186	0.0188517	0.196889	-0.133134	0.690321	-0.193386	0.0376888	-0.162353	0.58988	-0.314582	0.162519	0.504834	0.0372776	0.180654	0.15554	-0.0170377	0.847302	0.0456121	0.566142	-0.246304	-0.552555	-0.0551998	0.687338	-0.175439	-0.298463	-0.165241	-0.307175	-0.0786589	0.0888348	-0.289655	-0.0843277	0.152414	0.00863281	0.0908127	-0.0477617	-0.201727	0.556347	0.328315	0.052218	-0.249894	0.471212	0.335573	-0.23677	-0.210126	-0.543559	0.254316	0.0150818	-0.584121	-0.43568	-0.000402716
chr1_20176186_20226441	0.0050974	0.0795378	-0.188921	1.04114	0.336403	0.538552	0.311994	-0.285272	-0.131488	0.836899	0.381106	0.209381	0.269684	0.405695	0.558053	1.79289	0.3326	0.843558	0.00742962	0.367625	0.0897768	0.529742	0.755639	-0.319899	-0.0256937	0.200977	0.63159	0.609948	0.135089	0.169222	0.463232	0.104303	-0.00372311	0.170719	0.00892371	0.634124	0.703593	1.26647	0.138774	0.746774	0.387932	0.183084	0.171181	0.386904	0.542063	0.12984	-0.199828	-0.134105	0.380032
chr1_20226441_20276709	-0.337035	-0.379972	0.381571	-0.413935	-0.00458717	-1.37937	-0.110024	-0.362791	-0.367737	-0.53818	0.284022	-0.0803308	-0.200439	-0.37497	-0.0460177	-0.811254	-0.540821	0.273901	-0.527416	-0.806442	-0.191673	-0.37096	-1.00606	-0.987044	0.0127817	-0.522034	-0.267057	0.639485	-0.396273	0.029228	-0.386101	-0.193282	-0.311997	-0.223033	-0.445068	0.059794	-0.806952	-0.0768447	-0.221407	-0.562627	-0.264143	-0.189314	-0.322051	-0.27251	-0.212502	-0.315952	-0.643544	-0.367116	-0.40631
chr1_20276709_20327175	-0.161486	-0.176667	-0.839263	0.344704	-0.224092	0.411818	-0.413278	-0.575713	-0.622414	0.515356	-0.696678	-0.19865	-0.15144	-0.0553562	-0.371935	0.710588	0.00296099	-0.189263	0.0657073	-0.279757	-0.142916	-0.338907	-0.156135	-1.1402	-0.31078	-0.0740545	-0.294437	-0.745628	-0.238813	0.0507704	0.114965	0.0536438	-0.0390917	0.0540489	-0.322089	0.17794	-0.496219	0.741327	-0.0638878	-0.132411	-0.0967707	-0.217251	-0.158726	-0.373155	-0.411463	-0.110068	-0.690282	-0.0531433	0.051947
chr1_20327175_20377805	-0.583898	-0.408054	-0.6309	-0.574768	-0.377747	-0.514535	-0.615845	-0.654279	-1.0648	-0.16038	-1.00134	-0.317598	-0.211626	-0.389483	-0.271548	-0.0262607	-0.703921	-0.393945	-0.586956	-0.824129	-0.480948	-0.0111947	-0.853108	-0.761737	-0.560788	-0.295233	-0.738286	-0.557021	-0.428825	-0.324513	0.258257	-0.376818	-0.226026	-0.248707	-0.637712	-0.337165	-0.747042	0.128343	-1.15366	-0.576068	-0.845116	-0.519805	-0.414865	-0.503823	-0.424859	-0.206007	-1.07266	-0.151936	-0.892967
chr1_20377805_20427987	0.474996	0.0682291	-0.946758	-0.158675	0.255404	-0.555076	0.0382713	0.194333	-0.210125	0.335035	-0.343929	0.257015	-0.0841514	0.161418	0.0454099	-0.116566	-0.20323	-0.362816	0.173316	-0.459698	0.033842	0.0592779	-0.116458	-0.874383	0.0400338	0.210015	-0.29984	-0.673122	-0.0953625	0.709231	-0.125954	0.241231	0.209512	0.232148	-0.123547	0.0890455	-1.07379	-0.0589038	0.190673	-0.616928	-0.144886	0.160957	0.109108	-0.161014	0.0326341	0.0206447	-0.559879	0.312332	0.0177004
chr1_20427987_20478297	0.19552	0.192592	0.687718	0.301195	0.382908	-0.231087	0.0489001	0.0565503	-0.262242	0.19031	0.182418	0.467485	0.245804	-0.0747181	-0.00527906	-0.524582	0.231486	0.0418773	0.0539254	-0.314026	0.0947419	-0.0277117	-0.0103347	-0.125658	0.377397	0.149202	0.21919	-0.000515841	0.357361	0.463037	0.39069	0.30631	0.288635	0.436812	0.109625	0.546152	-0.585024	-0.261054	0.2108	0.132406	0.27837	0.218095	0.256436	0.496389	0.247108	0.0221618	-0.122173	0.154891	0.0775087
chr1_20478297_20528572	-0.0104839	0.0353908	-0.459525	-0.681732	0.14837	-0.35743	0.057303	0.197006	-0.358695	-0.223498	-0.074073	-0.12934	-0.0199811	-0.0715243	-0.165494	-0.51538	-0.365396	-0.11232	-0.176753	-0.997712	-0.651594	-0.376059	-1.09338	-0.588446	0.148233	-0.208143	0.0854522	-0.236566	-0.0789414	0.0783963	-0.230986	0.111646	-0.00641416	0.0101962	-0.0285158	0.393352	-1.52506	-0.822698	-0.217459	-0.341492	-0.130761	0.122755	0.286532	-0.27008	-0.129879	-0.102545	-0.417323	0.0765135	-0.33473
chr1_20528572_20578657	0.356141	0.255579	-0.418457	0.431619	0.49461	0.488202	0.139732	0.169418	-0.23143	0.252142	0.10079	0.200427	0.290703	0.321154	0.129543	0.632774	-0.0414967	0.38212	0.217704	0.219785	0.135805	0.483856	0.157867	-0.315713	0.224825	0.0569936	0.195924	0.378623	0.0296344	0.438123	0.660448	0.12121	0.494897	-0.0518466	-0.117746	0.571213	-0.0904968	0.648881	-0.301748	0.457832	0.18461	0.104149	0.473559	0.397902	0.23149	0.283288	-0.375783	-0.0445518	-0.190339
chr1_20578657_20628796	0.188012	0.15815	-0.198127	-0.397963	0.138812	-0.64859	-0.0988917	0.0458283	-0.319959	-0.29495	-0.617707	0.222449	0.31006	-0.0544502	-0.00445293	-1.45675	0.267378	-0.920694	0.188921	-0.682833	-0.198845	0.0592292	-0.847829	-0.271369	0.0705016	0.0111012	-0.141906	-0.253616	-0.00120376	0.162876	0.230686	0.0768203	0.117649	0.175947	-0.0689437	0.393425	-0.881016	-0.533684	-0.108238	-0.283268	0.246716	0.200889	0.305061	0.518513	0.320543	0.142085	-0.158712	0.364419	-0.127451
chr1_20628796_20678826	-0.0103529	0.298879	-0.722064	-0.302524	0.121582	0.19858	-0.154076	0.0550784	-0.272467	-0.340356	-0.232477	0.336926	0.185504	-0.0552295	-0.233464	-0.13116	-0.0253595	-0.147891	0.142234	-0.884865	-0.199941	-0.272429	-0.415259	-0.542451	0.193054	-0.202165	0.179965	0.0939747	0.269253	0.093769	-0.00864049	0.0313648	-0.0949499	0.0740307	-0.20617	-0.109471	-1.13002	-0.371432	0.122551	-0.682827	-0.29373	0.0435796	-0.0277372	-0.210278	0.0274022	-0.0406136	-0.572496	0.0642881	0.0599763
chr1_20678826_20728861	0.199756	0.280996	0.0318152	0.137995	0.451686	-0.104786	0.0912622	-0.207508	0.0144262	0.103691	-0.0354504	0.283882	0.186176	0.0780603	0.0579197	-0.614162	0.112538	-0.146021	0.303544	-0.418767	-0.507584	0.151778	-0.414478	-0.0174591	0.348636	0.292136	-0.10253	0.179778	0.32828	0.181337	0.0361008	0.271013	0.118532	0.0238888	0.00744165	0.0108676	-0.353578	-0.107756	0.140881	0.214376	0.300655	0.182405	0.197174	-0.283833	0.0500916	-0.0171344	-0.178537	-0.797527	-0.0721615
chr1_20728861_20778958	0.00518237	-0.0763612	-0.138909	-0.638485	0.0165899	-0.189538	-0.199493	-0.539086	-0.413709	-0.441298	-0.936861	-0.0447027	-0.057657	-0.149599	-0.0817265	-1.54524	-0.331818	-0.641137	0.0957128	-1.20298	-0.649668	-0.108115	-0.82713	-0.808558	-0.159334	0.0551267	-0.185273	-0.515475	0.226645	0.372545	-0.222605	-0.0491226	0.179332	0.123731	-0.31234	-0.190888	-1.22649	-0.114654	-0.419035	-0.619451	-0.491986	0.0125617	0.281252	-0.301566	-0.109099	-0.159811	-0.494184	-0.0696041	-0.243084
chr1_20778958_20828977	-0.107561	0.171133	-0.466765	0.132046	-0.165792	0.264466	0.0962128	-0.335442	-0.377651	0.02817	-0.719726	0.0338768	0.0246007	0.0319535	-0.458784	0.221352	-0.0538889	-1.03371	-0.081009	-0.454485	-0.0941155	-0.277945	-0.32494	-0.550093	-0.0757844	0.00287296	-0.567544	-0.921756	0.0835077	0.188637	0.340724	0.137866	-0.0311161	-0.0359365	-0.132279	0.571283	-0.426179	0.621294	-0.13853	0.137317	-0.450206	0.128188	0.208404	0.141045	0.339707	0.185132	-0.743869	-0.347896	-0.350408
chr1_20828977_20879471	-0.353083	-0.21704	0.284464	0.311153	-0.114743	-0.557461	-0.49504	-0.206287	-0.776084	0.0248991	0.29501	-0.301751	0.0248896	-0.0401648	0.0670621	0.258201	-0.160329	0.0782823	-0.173623	-1.00699	-1.01168	0.122267	-0.307103	-0.435467	-0.595042	-0.213566	0.196859	0.0356525	-0.202667	-0.0663052	-0.658204	-0.314645	-0.306692	-0.488602	-0.398435	-0.0751005	-0.202519	-0.00433187	-0.775473	0.562684	-0.092116	-0.29637	-0.67944	-0.0902905	-0.35752	-0.23084	-0.868239	-0.308896	-0.335947
chr1_20879471_20929671	-0.164804	0.166247	-0.967424	-0.231572	0.107507	0.336824	-0.151786	0.271449	-0.470374	0.214211	-0.536511	0.241724	-0.153411	0.0832133	-0.0657509	0.0304888	-0.316735	-0.612105	0.0381599	-0.818658	-0.0956402	-0.00505414	-0.0837517	-0.555896	-0.60229	-0.295345	-0.129141	-0.833489	0.0645907	-0.0807937	-0.490698	-0.0632569	-0.268842	0.0123412	-0.176381	0.262294	-0.619986	0.581958	0.0122534	-0.609961	-0.167331	0.00487835	0.0435469	-0.401408	0.0241689	-0.194537	-0.551115	-0.141142	0.158767
chr1_20929671_20979942	-0.256126	-0.147427	-0.167211	-0.306035	0.122144	0.0506401	-0.160304	-0.10352	-0.517475	0.449111	-0.116526	-0.0214749	-0.353118	-0.0787356	-0.335361	-0.049982	-0.409189	-0.334887	-0.0158218	-0.279164	-0.147	-0.0606685	-0.325444	-0.662375	-0.481176	0.110104	-0.274495	-0.509109	-0.483857	0.157864	0.0517707	-0.125405	-0.196421	-0.0287493	-0.281875	-0.0346006	-1.5299	0.705066	-0.298405	-0.351963	-0.244913	-0.180344	-0.0945941	0.0972071	-0.106491	-0.00592227	-0.463629	-0.0566448	-0.388949
chr1_20979942_21030286	-0.181774	-0.399256	0.115208	-0.461801	0.0227899	-0.660199	-0.325672	0.258186	-0.679294	-0.271471	-0.453259	-0.103395	-0.491343	-0.471513	-0.447169	-0.813649	-0.406196	-0.402346	-0.357815	-1.17138	-0.256678	-0.347933	-0.555399	-0.925673	-0.466552	-0.100809	-0.530997	-0.189395	-0.0699157	-0.259759	-0.245382	-0.124903	-0.0220435	-0.0514872	-0.493028	-0.614237	-0.606368	-0.987702	-0.325709	-0.69121	-0.141752	-0.285514	-0.383208	-0.885482	-0.329983	-0.475303	-1.03994	-0.119174	-0.0508407
chr1_21030286_21080535	-0.0179704	0.0146998	0.859814	1.45368	-0.270176	0.881575	-0.0270936	0.755872	-0.452684	0.94363	0.931488	-0.185763	0.407217	0.672726	0.675205	1.76684	0.622027	1.27756	0.537637	0.45361	0.0525605	1.10086	0.751823	0.367671	0.23069	0.246881	0.891742	0.902257	-0.0769555	-0.0357072	0.540319	0.0670761	0.290027	-0.240261	0.209483	-0.122821	1.21106	0.67052	-0.269983	1.43569	0.673567	-0.0574343	-0.102784	0.302284	-0.0115385	0.10417	-0.311568	0.177373	0.305073
chr1_21080535_21130856	-0.418568	-0.177758	0.236487	0.197771	-0.115025	0.079589	-0.147717	-0.103715	-0.506303	-0.171247	-0.26839	-0.0434209	-0.383562	-0.0386173	-0.0173076	0.780056	-0.344333	0.0174023	-0.374123	-0.55349	-1.403	-0.26873	0.246236	-0.631375	-0.649012	-0.114883	-0.42958	-0.402801	-0.299413	-0.512087	-0.475645	-0.516702	-0.318668	-0.344091	-0.567734	-0.469854	-0.453185	0.500415	-0.333735	0.209174	-0.310083	-0.417606	-0.118653	0.464629	-0.260629	-0.471064	-0.913139	0.0670831	-0.179092
chr1_21130856_21183867	-0.306079	0.0264827	0.240653	0.221159	-0.389882	-0.865036	-0.567799	-0.452401	-0.862626	-0.443481	-0.253242	-0.372261	-0.148646	-0.685817	-0.35743	-0.42877	-0.414905	-0.259776	-0.311672	-1.11998	-0.440868	-0.083073	-1.04214	-0.920028	-0.574212	-0.258651	-0.066591	-0.0360305	0.000924658	-0.0641005	-0.168872	-0.416012	0.00210482	-0.501696	-0.494048	-0.503072	-1.09311	-0.0338876	-0.118786	-0.592811	-0.158372	-0.37714	-0.340206	-0.359931	-0.429149	-0.515771	-0.840174	-0.338713	-0.668456
chr1_21183867_21234138	0.151075	-0.00272418	0.0958092	0.0238861	0.0778106	0.0842298	-0.188955	-0.360356	-0.421392	-0.06137	0.099759	0.0436038	0.0567928	-0.232241	-0.113527	0.278483	-0.112105	0.0700905	-0.0927804	-0.690801	-0.552712	0.114364	-0.899494	-0.306974	-0.164408	-0.159788	0.280666	-0.498348	-0.0747796	-0.11244	0.0294671	0.107275	0.207234	0.216092	-0.270373	0.0155355	-0.748019	-0.277848	-0.684455	-0.0520902	-0.343301	-0.0880183	0.0658406	0.112917	0.154129	0.0845881	-0.314051	0.420417	-0.42203
chr1_21234138_21284827	-0.141553	-0.353677	-0.463159	0.165295	-0.174326	-0.886609	-0.0516408	0.0726275	-0.614379	-0.218775	-0.882974	-0.0733156	-0.430381	-0.199358	-0.179742	-0.327457	0.000710666	-0.243576	-0.161458	-1.01208	-1.1275	-0.303476	-0.332799	-0.610894	-0.41456	0.0463745	0.265142	-0.474739	-0.0128597	-0.0173241	-0.53395	0.00906241	0.00821295	0.0691638	-0.356559	-0.0407129	-1.91535	0.237451	-0.181286	-0.231144	-0.144242	-0.134529	-0.251481	0.286276	0.253622	-0.148544	-0.7865	-0.206196	0.00921555
chr1_21284827_21334983	-0.0498298	0.2481	-0.988	-0.0016869	-0.1554	0.572562	0.129488	0.237361	-0.397089	0.39566	-0.19327	-0.0659525	-0.0412773	0.20135	-0.197562	0.0905485	0.304026	0.175387	-0.0524175	-0.484872	-0.611377	-0.184856	0.168982	-0.472291	-0.318856	0.359081	-0.107881	-0.291517	-0.564577	-0.0191431	-0.493659	-0.0322802	0.123231	0.0840347	-0.366665	0.280631	-0.873822	0.210887	-0.415377	-0.424444	-0.381112	0.0562173	0.059517	-0.211973	0.191267	-0.282685	-0.0846466	0.181946	-0.334813
chr1_21334983_21386404	-0.0632567	0.0325943	0.306051	0.200916	-0.290812	-0.0533868	0.149592	-0.0107648	-0.152438	0.0853545	0.71319	-0.0717716	-0.209596	0.0682909	0.285101	0.251392	0.31474	1.0885	-0.242333	-0.55496	-0.812294	0.280327	-0.149832	-0.44808	0.0402034	0.0867484	0.199409	0.218017	-0.179747	0.155455	-0.202653	-0.166461	0.0284052	0.00548938	-0.177803	0.0385163	0.0936773	-0.137704	-0.0202585	0.710237	-0.13969	-0.0709072	-0.340704	-0.80249	0.343143	-0.220308	-0.331969	0.0520451	0.0471287
chr1_21386404_21437525	-0.108246	-0.183219	-0.569505	0.0313475	-0.0250426	-0.301198	-0.597088	-0.204532	-0.763734	0.00936568	0.221138	-0.18783	-0.217407	-0.428925	-0.52061	0.462513	-0.931044	-0.717017	-0.209186	-0.777987	-0.472501	0.258631	-0.355853	-1.01161	-0.800695	0.0400357	-1.50262	-0.707693	-0.123842	-0.687715	0.255485	-0.306082	-0.304852	-0.183822	-0.312758	0.134028	-0.34792	0.0924889	-0.177565	-0.0777475	-0.0417246	-0.354365	-0.462116	0.128802	-0.230582	-0.119593	-0.609955	-0.25694	0.234326
chr1_21437525_21487848	-0.0198476	-0.28331	0.371688	-0.0294297	0.0729495	-0.232793	-0.221287	-0.415821	-0.555986	0.100115	-0.310179	-0.131998	-0.182638	-0.509557	-0.246432	0.246705	-0.19311	-0.0527899	-0.255229	-0.780823	-0.277441	0.0108671	-0.278408	-0.894985	-0.791395	-0.254199	-0.438042	-0.414118	-0.359924	-0.0645953	0.424701	-0.162624	-0.188707	0.258568	-0.336925	0.384337	-0.699494	0.221973	-0.316773	-0.409417	-0.0223421	-0.181773	-0.251545	-0.376072	0.0980543	-0.282521	-0.463792	-0.296076	-0.0835282
chr1_21487848_21538275	-0.375544	0.172298	0.471817	0.746023	-0.0509233	1.06149	-0.0313848	0.98106	-0.829521	0.643055	-0.135159	-0.614384	-0.853255	0.223799	0.117506	1.45924	-0.219832	0.00418801	-0.172039	0.35479	-1.31124	0.260581	0.245641	-0.334546	-0.591195	0.0996841	0.153276	-0.0130821	0.0868767	-0.348448	-0.268675	-0.169219	-0.0619579	-0.304814	-0.129443	0.0807709	0.271221	0.829266	-0.420644	0.575581	-0.320307	-0.378183	-0.374924	-0.126862	-0.00797461	-0.252461	-0.52904	0.0570792	-0.129366
chr1_21538275_21588465	-0.101655	-0.0510983	-0.254358	-0.218498	0.0522413	-0.294536	-0.116132	-0.470831	-0.310651	-0.891949	-0.310696	0.141007	-0.152462	-0.48254	-0.129891	-0.718074	-0.0492767	-0.218144	-0.183075	-0.780521	-0.0942401	-0.106276	-0.500617	-0.429714	-0.297129	-0.320779	-0.445409	-0.591611	0.147001	-0.0163431	-0.369397	0.0242644	0.0364285	-0.0689378	-0.333191	0.00709785	-0.450802	-0.347169	-0.30731	-0.55952	-0.513193	-0.0351831	0.0541274	0.237316	0.131321	-0.219892	-0.65132	-0.183001	-0.0203746
chr1_21588465_21638753	0.0603899	0.138771	0.119837	-0.116538	-0.115641	0.0542111	-0.248443	0.13154	-0.717492	0.577302	-0.30867	-0.202715	-0.724963	-0.0879948	-0.260316	0.401921	-0.0820041	-0.446847	-0.217902	-0.00735213	0.0527593	-0.129183	0.0371062	-0.750298	-0.325453	-0.219167	-0.733213	-0.447774	0.0417442	0.0713445	0.0379098	-0.0931049	0.114762	-0.344896	-0.179013	0.301943	-0.592701	0.836421	-0.225383	-0.0296427	-0.704778	0.0047979	-0.0653169	-0.259122	0.347419	0.029174	-0.441784	-0.30968	-0.323524
chr1_21638753_21688905	0.0875399	-0.176226	-0.057386	-1.16367	0.0380225	-0.319248	-0.187651	-0.16594	-0.167506	-0.486251	-0.419618	-0.00328138	-0.392913	-0.335048	-0.657191	-1.37492	-0.103015	-0.815671	-0.0698835	-1.25599	-0.0942428	-0.836781	-0.910172	-0.691848	-0.447298	-0.0279286	-0.464309	-0.845776	-0.181445	-0.019278	0.00477333	-0.189622	-0.509213	0.10371	-0.346	0.275871	-1.7015	-0.501858	-0.576511	-1.77482	-0.534301	9.93228e-05	0.11842	-0.116916	0.506048	-0.524862	-1.20943	-0.0831807	0.0433767
chr1_21688905_21740537	-0.44212	-0.412066	-0.331037	-0.446835	-0.551855	-0.193994	-0.699386	-0.449568	-1.16247	0.0431298	-0.842428	-0.349668	-0.407657	-0.627909	-0.596419	-0.696711	-0.143977	-1.09058	-0.499283	-0.983545	-0.742731	-0.843317	-0.617821	-1.49878	-0.885866	-0.667071	-0.840825	-1.13663	-0.619749	-0.741916	-0.905517	-0.665794	-0.402583	-0.604353	-0.888346	-0.523614	-0.956265	-0.063456	-0.590694	-0.836419	-0.250486	-0.435988	-0.387787	-0.487978	-0.55828	-0.990516	-0.934699	-0.630003	-0.7833
chr1_21740537_21791465	-1.24872	-1.01557	-1.58792	-0.706253	-1.32111	0.0825052	-1.4961	-0.672755	-1.73877	-0.932704	-0.791187	-1.32258	-1.19146	-1.44838	-1.06398	-0.609733	-0.823491	-0.682568	-1.05177	-0.986743	-1.45256	-1.06973	-1.05641	-1.45763	-0.96444	-0.975471	-1.11813	-1.02781	-0.914189	-1.30802	-1.11342	-1.18343	-1.10427	-1.26068	-1.45859	-1.42085	-0.875994	-0.78364	-1.1774	-0.234681	-0.790709	-1.15533	-1.17319	-0.695808	-1.04455	-1.3517	-1.71349	-0.964698	-1.2507
chr1_21791465_21842343	-0.578806	-0.8594	-1.65357	-0.645105	-0.847414	-0.081357	-0.628276	-0.0485394	-0.990011	-0.946715	-1.61804	-0.650214	-0.585687	-0.734572	-1.08489	-1.02272	-0.76152	-1.42145	-0.631477	-1.10844	-0.724959	-0.792866	-0.410121	-1.31526	-0.575999	-0.899955	-0.953327	-0.87355	-0.441425	-0.344752	-0.513103	-0.503351	-0.794193	-0.650589	-0.825651	-0.831742	-0.913746	-0.391455	-1.05327	-0.900397	-0.697227	-0.707768	-0.406878	-0.554968	-0.572645	-0.491844	-0.831103	-0.659764	-0.769897
chr1_21842343_21892740	-0.112654	0.335038	-0.0215468	0.182028	-0.165778	-1.63019	-0.169484	-0.463173	-0.578636	-0.562067	0.073262	-0.1361	-0.130055	-0.243275	-0.101625	-0.426973	0.264271	-0.0489623	-0.178583	-0.885041	-0.441542	-0.227488	-0.606733	-0.546181	-0.414612	-0.12231	-0.00781254	0.191338	-0.000783174	0.172889	0.0560812	-0.0797262	-0.56802	-0.178891	-0.0494894	-0.110589	-0.166153	-0.327283	-0.0847929	-0.051216	-0.126839	-0.231338	0.036451	-0.298524	0.14521	-0.698078	-0.716701	-0.185824	-0.147279
chr1_21892740_21943038	-0.0996193	-0.177157	0.0447719	-0.575646	-0.00477395	-0.680816	-0.373953	-0.642538	-0.424954	-0.541756	-0.0110123	0.259468	-0.341773	-0.556718	-0.168062	-1.00046	-0.428508	-0.266957	-0.107964	-0.766145	-0.864614	-0.110605	-0.93709	-0.599834	-0.083355	-0.0522423	-0.124085	-0.187928	0.0882362	-0.0823143	-0.361347	-0.0129391	-0.0831241	0.233264	-0.345486	0.652708	-1.09931	-0.61452	-0.223995	-0.735411	-0.0694501	-0.0442818	-0.175903	-0.62978	-0.08795	-0.387037	-0.830086	0.0709063	-0.261075
chr1_21943038_21993188	-0.223588	-0.376584	-0.315199	-0.266957	-0.166988	0.0410197	-0.0577835	0.789441	-0.781972	0.557996	-0.105765	-0.013261	-0.168276	0.0451377	-0.266352	-0.205775	-0.385751	-0.151381	0.152426	-0.0605907	-0.483304	-0.29677	0.00716364	-0.58246	-0.0101567	-0.300816	-0.268034	-0.152357	-0.0526818	0.319851	0.0901041	0.0201472	0.125599	-0.0105094	-0.459433	0.559432	-0.800973	0.58361	-0.271008	-0.446225	-0.258859	0.0749771	0.00469788	-0.166132	0.170533	-0.260075	-0.690724	0.0427084	-0.153756
chr1_21993188_22043418	0.103078	0.076287	0.385006	0.726921	0.269761	0.594324	-0.0608019	0.474223	-0.463166	0.256039	0.434194	-0.0732698	0.141323	0.516648	0.00987913	1.47435	0.276059	0.232087	0.188555	0.0889168	-0.239174	-0.108149	0.148693	-0.103867	0.0501546	-0.0442051	-0.174276	0.321797	0.460929	-0.119162	0.157105	0.0579943	0.23757	-0.0524647	-0.232752	0.155916	-0.0999958	0.608807	-0.0346122	0.381034	0.108201	0.145428	0.00813948	-0.0768478	0.110731	0.0586749	-0.480487	-0.244087	-0.58205
chr1_22043418_22093608	-0.381691	-0.211524	-0.526323	-0.253064	-0.194324	0.131447	-0.846564	-0.314393	-0.788018	-0.234781	-0.454884	-0.420141	-0.282026	-0.36759	-0.354419	0.197232	-0.189828	-0.390436	-0.205719	-0.653219	-1.36921	-0.186171	0.403907	-0.502035	-0.58848	0.0247353	-0.300876	-0.73911	-0.106849	-0.309407	-0.386528	-0.218333	-0.221977	-0.0737837	-0.391259	-0.143771	-1.14718	0.21734	-0.333866	-1.13334	-0.671565	-0.295088	-0.131064	0.00645113	-0.236474	-0.291613	-0.352327	-0.295039	-0.829338
chr1_22093608_22143978	-0.260285	-0.178528	0.146211	0.740152	-0.279714	0.689737	-0.946121	0.437778	-0.526078	0.95973	0.179445	-0.380349	-0.559582	0.0710874	-0.00329422	1.42134	-0.031609	0.220266	-0.150614	0.323186	-1.08617	-0.00760966	0.778752	-0.937058	-0.797389	0.146655	-0.0593317	-0.114414	0.0192744	-0.399592	0.575163	-0.0318845	-0.38504	-0.269823	-0.148264	-0.397459	0.1872	1.36	-0.225868	-0.224071	-0.25953	-0.253945	-0.516605	-0.543818	-0.105238	0.151499	-0.710528	-0.19234	-0.283239
chr1_22143978_22194289	0.166875	0.164207	0.413658	0.392198	0.149324	-0.591193	-0.218822	-0.205928	-0.35045	0.0409654	0.407172	0.339514	0.441343	-0.00536388	0.489764	0.322261	0.419824	0.598846	0.182119	-0.176361	-0.47494	0.484938	-0.0208034	-0.0191	0.13728	0.0510206	0.335116	0.343232	0.366033	0.522054	-0.230291	0.0272177	0.0963975	0.19959	0.162581	0.0188391	0.14029	0.0869535	-0.00243891	-0.0137564	0.22353	0.040049	0.267365	-0.190934	0.433851	-0.120882	-0.178133	-0.0762307	0.205839
chr1_22194289_22244489	0.0693401	0.0565009	0.41735	0.427079	0.249284	-0.0150948	-0.31707	-0.5524	-0.302861	-0.363583	0.408353	0.16097	0.409415	0.112782	0.309753	0.16539	0.236968	0.611891	0.112828	-0.529832	-0.0663359	0.467697	-0.269801	0.0714668	0.356059	-0.0352953	0.148854	0.460274	0.199428	0.1841	-0.10719	0.0179628	0.286106	0.27879	0.186205	0.182554	0.238971	-0.141683	-0.0944373	-0.00151103	0.377567	0.0173418	0.201054	-0.113872	0.743004	0.0130874	-0.188975	-0.0569888	-0.0484282
chr1_22244489_22294812	-0.358959	-0.436518	-0.584225	-0.318779	-0.325996	0.655983	-1.0085	0.585618	-0.863935	0.410776	-0.94797	-0.304877	-0.444058	-0.504921	-0.52761	-0.14578	-0.557672	-0.949787	-0.330946	-0.438145	-0.811609	-0.982204	-0.0298073	-1.19422	-0.879212	-0.281966	-1.03366	-0.978728	-0.274254	-0.128412	-0.25696	-0.136368	-0.0688679	-0.515781	-0.595061	-0.027285	-0.881471	0.465396	-0.595669	-1.25736	-0.299449	-0.224004	-0.624978	-0.135202	0.152904	-0.29875	-0.67363	-0.320738	-0.58244
chr1_22294812_22345156	-1.63825	-1.20587	-1.65745	-1.38111	-1.83756	-1.3605	-2.26804	-0.939892	-1.76142	-1.43874	-2.40456	-1.71386	-1.77868	-1.74414	-1.58821	-1.19441	-2.32546	-2.18581	-1.49229	-1.44928	-1.43765	-1.59871	-1.43056	-1.85123	-2.36013	-2.01933	-1.70863	-1.67525	-1.50274	-1.57873	-1.4063	-1.66185	-1.80583	-1.11115	-1.65558	-0.986847	-3.10062	-0.707065	-1.4737	-2.98673	-1.35662	-1.62331	-1.64489	-0.936039	-1.19079	-1.62299	-2.42252	-1.44092	-1.51503
chr1_22345156_22395604	-0.704295	-0.403214	-0.802359	0.255287	-0.373909	-0.435177	-1.01996	-0.457291	-1.15287	-0.371011	-0.649063	-0.74609	-0.529493	-0.740926	-0.275197	0.146902	-0.841621	-0.63497	-0.402575	-0.619303	-0.669724	-0.237655	-0.217652	-0.975267	-0.998131	-0.717375	-0.6168	-0.464638	-0.757583	-0.122491	-0.51056	-0.526403	-0.388391	-0.373363	-0.67971	-0.31455	-1.23912	0.460523	-0.642637	-1.11281	-0.563129	-0.512418	-0.496324	-0.0247616	-0.273212	-0.500782	-0.870543	-0.492262	-0.618611
chr1_22395604_22446171	-0.178313	-0.0688196	0.240279	-0.32356	0.0701908	-0.453124	-0.21449	-0.274132	-0.720921	-0.262793	0.213066	-0.294441	0.0314362	-0.392058	-0.129567	-0.767076	-0.255376	0.369107	-0.311992	-0.275148	-0.342114	0.225416	-0.81948	-0.622159	-0.0610137	-0.115183	-0.0645042	0.13056	-0.132837	-0.112973	-0.0940496	-0.195472	-0.0883115	-0.244775	-0.361818	-0.256593	-0.84439	-0.586635	-0.267421	-0.304683	-0.133404	-0.162852	-0.0378276	-0.845346	-0.0133125	-0.259077	-0.495551	-0.193906	-0.103989
chr1_22446171_22496326	0.0606064	-0.212854	-0.284015	-0.602372	-0.0675189	-0.429925	-0.153468	-0.15856	-0.297726	-0.231345	-0.217461	0.0625355	-0.0420284	-0.113533	-0.291895	-0.759909	-0.177984	-0.419371	0.140322	-0.705453	-0.360259	-0.150005	-0.42428	-0.477319	0.0869538	-0.109084	-0.368077	-0.129001	0.198373	0.00761981	-0.12965	-0.106636	0.129267	0.000776148	-0.456064	0.0696631	-0.83992	-0.391173	0.0349589	-0.63767	-0.27166	0.0911708	0.220636	-0.489702	0.261761	-0.258695	-0.652432	-0.52202	-0.103553
chr1_22496326_22546709	0.22543	0.08301	0.259681	-0.273877	-0.0696299	-0.982455	-0.204044	0.198259	-0.241037	-0.385741	0.0247935	-0.242027	0.0731153	0.0117991	-0.0640723	-0.48091	-0.265896	0.0745524	-0.1456	-0.711567	-0.200293	-0.0519396	-0.646008	-0.381302	-0.077234	0.0592178	0.0509412	0.473153	0.121152	0.0344422	-0.58522	0.189951	-0.493065	-0.0951253	-0.1346	-0.042213	-1.20546	-0.35069	-0.214613	-0.738161	0.270849	-0.000365761	0.139571	0.343657	0.068255	-0.022969	-0.131236	-0.0717718	-0.436235
chr1_22546709_22596769	0.143677	-0.00803748	0.291132	-0.66147	0.191862	-0.207605	0.14247	0.182118	-0.40229	-0.734264	0.0692816	0.101671	0.278737	-0.115334	0.0502119	-2.44136	-0.318388	0.271304	-0.174132	-1.23346	-0.0316462	0.14467	-1.01196	-0.402797	0.383616	-0.0543785	0.00420368	0.17733	0.0137612	0.274859	-0.44996	0.298537	0.0149458	0.272412	-0.0787564	0.475554	-1.2002	-0.626182	0.00605571	-0.728611	0.212839	0.260019	0.1416	-0.258142	0.956165	-0.361738	-0.841969	0.0355824	-0.292883
chr1_22596769_22646804	-0.227316	0.111753	0.582834	-0.351914	-0.0252953	-0.599762	-0.200653	0.10755	-0.326477	-0.0781059	0.381255	-0.10753	0.26522	-0.102459	-0.01428	-0.139963	0.047609	0.0598758	0.115684	-0.229423	-0.435461	-0.149321	-0.433619	-0.429922	0.135802	-0.256284	0.113311	0.424182	0.319324	0.207492	-0.0240439	0.0611213	0.164555	-0.376833	-0.200333	-0.24892	-1.09668	-0.0212838	-0.350783	-0.475593	0.0638502	0.0217341	0.255285	0.302624	0.186583	-0.224156	-0.521089	0.177608	0.149328
chr1_22646804_22696811	0.165585	0.0999825	-0.304589	-0.461404	0.2013	-0.356494	-0.0187727	0.107044	-0.213041	-0.277812	-0.0693955	0.133654	0.211574	-0.0707473	-0.101945	-0.511752	-0.0334903	-0.154784	0.0133477	-0.959135	-0.4405	-0.044368	-0.414551	-0.566436	0.0637916	0.0892413	0.0686573	-0.0160664	0.292368	0.476322	-0.461118	-0.00765882	0.0894155	0.186116	-0.128539	0.0716454	-0.877816	-0.429269	-0.264452	-0.210161	-0.180127	0.105849	0.123656	0.0666404	0.0829244	-0.0652398	-0.341418	-0.337959	-0.0329265
chr1_22696811_22747018	0.262752	0.138897	-0.149795	-0.231578	0.276246	0.118584	0.119834	0.0996551	-0.0446659	0.0494708	-0.530522	0.315051	0.327776	0.200842	-0.0207357	-0.833393	0.273666	-0.381334	0.349859	-0.571254	-0.31928	-0.230307	-0.489612	-0.56564	-0.0951495	0.336285	0.00786055	0.0510597	0.303096	0.130767	0.211627	0.214351	0.294647	0.213637	-0.0694594	0.14615	-0.951873	0.0889149	0.196795	-0.281286	0.109276	0.324209	0.0252741	0.14754	0.155046	-0.22411	-0.587716	-0.0107415	0.179185
chr1_22747018_22797225	-0.0073072	-0.0259867	-0.2086	0.294261	0.00701726	-0.552798	-0.301162	-0.401949	-0.491422	-0.384459	0.57786	-0.0286234	0.180325	-0.0969135	-0.228932	0.307157	0.158341	0.391679	-0.349363	-0.64996	-0.595021	0.0277893	-0.255204	-0.871716	-0.181086	-0.0177155	-0.136541	0.693183	-0.0779947	-0.38516	-0.0195911	0.0924363	-0.19083	0.0371044	-0.25754	-0.188496	-1.00288	0.214961	-0.365246	-0.346673	-0.263442	-0.234022	-0.231138	0.0345829	-0.12055	-0.236711	-1.02833	-0.290761	-0.282153
chr1_22797225_22847392	0.311507	0.232271	0.0788693	-0.219998	0.422008	0.763801	0.274306	0.334027	-0.33531	0.34392	0.174834	-0.0933187	0.310081	0.330488	0.181502	-0.629191	0.542726	0.160482	0.136031	-0.649942	-0.258526	0.243377	-0.0918616	-0.448589	0.05917	0.308453	0.448171	0.132244	0.514245	0.257051	-0.0195473	0.19936	0.385241	0.144905	0.103285	0.147738	-0.950432	-0.0914804	0.248711	0.173691	0.678102	0.301389	0.330646	-0.0431625	0.22647	0.00180073	0.0831966	0.0157549	0.236064
chr1_22847392_22897491	-0.113795	0.281281	-0.0664185	-0.710467	0.293255	0.107998	0.0650018	1.02667	-0.391071	0.497865	-0.211976	-0.0622736	0.0622138	-0.0584266	-0.294593	-0.216499	-0.171276	-0.234962	0.0679196	-0.12019	-0.135876	-0.405158	-0.16725	-0.639642	0.113647	0.199657	-0.251151	-0.186262	0.253061	0.104552	0.479803	-0.0823342	0.00588512	0.0470961	-0.0914722	-0.108998	-1.82835	0.594403	-0.332702	-0.469263	-0.109921	0.231637	0.30183	-0.255484	0.0698035	-0.269182	-0.416031	0.397217	-0.175926
chr1_22897491_22947560	0.178566	0.375427	0.346345	0.684335	0.22721	0.759191	0.259737	-0.103869	-0.297928	-0.0736546	0.431048	0.203129	0.248897	0.589214	0.430053	1.24461	0.387311	0.524222	0.564169	0.387728	-0.562839	0.536933	0.464827	-0.0144193	0.174493	0.120989	0.406024	0.368672	0.12821	0.273584	0.265337	0.238513	0.421689	-0.00796925	0.298474	-0.09462	0.272777	0.572814	0.141898	0.683435	0.528159	0.114142	0.164818	0.0961844	0.124382	0.356075	-0.19036	0.0450818	0.467736
chr1_22947560_22997587	0.0241134	0.00303371	0.221591	-0.46238	0.254118	-0.620754	-0.0678368	-0.166252	-0.043089	-0.405931	-0.0989111	0.163157	0.0739218	-0.137793	-0.186724	-1.12134	-0.253521	0.038134	0.034505	-0.388132	-0.146583	-0.488711	-0.762918	-0.492763	0.161497	0.0539273	0.137371	0.188248	0.297697	0.0957122	-0.129911	0.0458367	-0.048445	0.113078	-0.0801528	0.0396621	-1.44677	-0.569263	0.118401	-0.688325	0.205478	0.237439	0.349702	-0.406568	0.230333	-0.261183	-0.131373	-0.0333469	-0.112749
chr1_22997587_23047887	-0.00455364	0.17884	-0.713162	-0.223898	0.0372207	0.340993	0.128998	-0.0504331	0.00536909	0.167492	-0.5371	0.146138	0.0304502	0.0336148	-0.023126	0.133809	0.246319	-0.437	0.139099	-0.238155	0.490258	-0.157428	-0.592149	-0.441179	-0.22389	-0.0954697	-0.210389	-0.305129	0.214488	0.32995	0.314728	0.22492	0.0867726	0.439477	0.0944079	0.654239	-0.968613	0.288734	-0.0100184	-0.62958	-0.147376	0.153514	0.307615	0.0308083	0.771228	0.0433716	-0.057875	0.156437	0.128885
chr1_23047887_23098188	0.258559	-0.000636938	0.666736	-0.361536	0.338826	-0.815609	0.269723	0.307692	0.102049	-0.300747	0.542771	0.00382399	0.13393	-0.261024	0.0830793	-0.619485	-0.143016	0.119333	0.0277284	-0.859958	0.00527404	0.27539	-0.283394	-0.648442	0.374538	-0.469182	0.284099	0.554723	0.0651997	0.648304	-0.017395	0.176328	0.313282	0.189071	-0.154413	0.270076	-0.646078	-0.745876	-0.101545	-0.177258	0.261447	0.171987	0.308689	-0.10502	0.251753	-0.248372	0.162665	0.0523458	-0.327747
chr1_23098188_23148230	0.0888698	0.27463	0.232147	-0.644421	0.225526	-0.640783	0.0572766	-0.236393	0.0582491	-0.433557	-0.145926	0.310572	0.0937586	0.0488146	-0.241978	-1.49328	-0.0373628	-0.151228	-0.0317179	-1.20242	0.146755	-0.11609	-0.707745	-0.702508	0.106578	-0.0715483	-0.182494	-0.264213	0.00673207	0.426937	-0.0594176	0.129411	0.0785525	0.121026	-0.137213	0.187261	-1.34129	-0.803275	0.0468285	-0.556527	-0.00911073	0.0657568	-0.00010085	-1.02157	0.480333	-0.482529	-0.155602	-0.0133326	0.295569
chr1_23148230_23198283	0.00784282	0.110502	-0.181498	-0.830883	0.0803748	-0.261296	-0.175422	-0.00196241	0.158699	-0.53994	-0.469042	-0.111735	-0.0294951	-0.154012	-0.280528	-0.818167	0.139726	-0.514759	0.047097	-0.696062	-0.0941208	-0.542866	-0.624661	-1.06603	-0.202509	-0.0876873	-0.452154	-0.206477	0.360333	-0.0872137	-0.0989371	0.0958303	0.117938	0.311131	-0.152042	0.00172118	-1.90949	-0.542901	-0.18329	-0.913129	-0.239887	0.0901799	0.335291	0.0247364	0.478436	-0.127131	-0.0725913	0.057802	-0.00452475
chr1_23198283_23248362	0.360095	-0.0452904	0.141674	-0.888673	0.483706	-0.000419747	0.136537	0.295774	0.408697	-0.0401498	0.0398153	0.289421	0.141802	0.121339	-0.106686	-1.36344	-0.429072	-0.0431549	-0.00182684	-0.798811	0.384821	-0.214007	-0.720724	-0.651203	0.122793	0.130209	-0.488576	-0.244929	0.491491	0.538888	0.662574	0.305279	0.278457	0.423482	-0.0444031	0.307091	-2.24427	-0.202763	-0.218991	-1.04201	0.197905	0.313309	0.387676	0.309776	0.597408	-0.14518	0.161933	0.467748	0.237864
chr1_23248362_23299362	0.0487286	0.0809105	-0.737284	-0.393132	-0.180433	-0.574068	-0.155482	-0.520431	-0.0536375	0.0082738	-0.925988	-0.284175	-0.242538	-0.0132222	-0.213853	0.372837	-0.371962	-0.94432	-0.129992	-1.25947	0.0919827	0.119368	-0.745704	-0.777423	-0.257538	-0.402946	-0.635004	-0.477288	-0.151381	0.121365	-0.764292	-0.0485004	-0.061339	-0.152776	-0.309431	-0.264142	-0.752794	0.0923264	-0.448688	-0.446852	-0.638105	-0.0513986	-0.195867	-0.0436351	0.192465	-0.419763	-0.0587138	-0.302773	-0.878552
chr1_23299362_23349786	-0.704917	-0.751901	0.11866	-0.124998	-0.589671	-1.15914	-0.666527	-0.821315	-0.379685	-0.0359772	-0.570759	-0.448379	-0.479576	-0.375121	-0.451473	0.694766	-0.171967	-0.772307	-0.473247	-0.769784	-0.569689	-0.134455	0.114277	-1.23719	-0.691963	-0.107247	-0.26752	-0.285941	-0.15951	-0.131211	-0.319327	-0.571895	-0.48216	-0.551827	-0.50507	-0.525209	-0.936486	0.107423	-1.1472	-0.688496	-0.83244	-0.462344	-0.439488	-0.452705	-0.281479	-0.23981	-0.455373	-0.688962	-0.528272
chr1_23349786_23400037	-0.144844	-0.200947	0.109597	0.272534	-0.270226	-0.243692	-0.257981	0.1231	-0.284082	-0.137659	0.173176	-0.348601	-0.556552	-0.307831	0.0705031	0.0133628	-0.689251	-0.481281	-0.0435913	-1.37981	-0.258924	-0.238299	-0.128337	-0.890354	-0.35923	-0.152357	-0.238657	-0.355568	-0.589579	-0.174751	-0.100274	-0.22633	0.028928	0.0356739	-0.409255	0.0941792	-0.982407	-0.0179458	-0.442243	-0.751761	-0.472279	-0.124054	-0.281905	-0.265717	0.280018	0.0128482	-0.250764	-0.343367	-0.562467
chr1_23400037_23450124	-0.00437941	-0.0106385	0.159728	-0.225331	-0.0719489	-0.745022	-0.0359299	0.105748	-0.0152892	-0.279553	-0.424041	0.23434	-0.631867	-0.103108	0.00372262	-1.15009	-0.0599744	-0.573318	-0.3735	-0.691496	-0.343807	-0.00646883	-0.507648	-0.937953	-0.0828924	-0.0220363	-0.303048	-0.122512	-0.134774	-0.0635314	-0.213728	0.0308692	0.360514	-0.153838	-0.386886	-0.19823	-0.963551	0.101352	-0.263588	0.106812	0.0625335	-0.161987	-0.0953435	-1.10994	0.318657	-0.382995	-0.0846288	0.0915203	-0.0320288
chr1_23450124_23500509	0.0112702	-0.0270453	-0.19264	0.194394	-0.130001	-0.111206	-0.256999	-0.222853	-0.186578	0.216483	-0.3247	-0.087754	-0.572682	-0.455233	-0.305716	0.789536	0.0279114	-0.19883	-0.382033	0.0447377	0.0420497	-0.535143	0.261824	-0.6326	-0.519144	-0.0778054	-0.370316	-0.885122	-0.293166	0.260482	-0.0226144	-0.151415	-0.545568	-0.362414	-0.353205	0.271267	-0.718776	0.546195	-0.0119663	-0.149385	-0.210509	-0.220037	-0.234023	0.0619042	0.179736	-0.012039	-0.0775812	0.185609	-0.303137
chr1_23500509_23550900	-0.1686	-0.691309	-0.809839	0.189685	-0.181759	-0.116015	-0.260301	-0.399647	-0.160647	0.34209	-0.49345	-0.489415	-0.385427	-0.172553	-0.170754	0.515694	0.195757	-0.426445	-0.0359485	-0.208571	-1.43863	-0.466113	0.140197	-0.828235	-0.6739	-0.226841	-0.56583	-0.731347	-0.267124	-0.360935	0.0547708	-0.267105	-0.0840221	-0.222992	-0.380806	0.0677493	-0.518988	0.708957	-0.631398	-0.00391604	-0.130723	-0.105322	-0.267967	-0.0253542	-0.106453	-0.101842	-0.058598	-0.48713	-0.190518
chr1_23550900_23601878	-0.278729	-0.311697	0.187824	-0.275187	-0.0528168	-0.697441	-0.25932	0.0077118	-0.0498748	-0.479795	-0.468623	-0.113195	-0.242276	-0.327512	-0.0927919	-0.139726	-0.0363038	-0.282576	-0.192998	-0.787018	-0.217476	-0.285365	-0.00394328	-0.946825	-0.541264	-0.265193	-0.164806	-0.0910868	-0.0803889	-0.359222	-0.0794708	-0.0714555	0.111746	-0.251266	-0.411418	0.167809	-1.72739	0.277906	-0.245478	-0.532386	-0.283141	-0.329118	-0.246492	0.388074	-0.375362	-0.294322	-0.26132	-0.156806	-0.205273
chr1_23601878_23652094	-0.23715	-0.179912	-0.0150119	-0.264279	-0.438602	-0.684546	-0.0254643	-0.0187427	-0.167945	0.0522739	0.400464	-0.155933	-0.347031	-0.0132611	-0.206506	0.055139	-0.0863244	-0.203802	-0.29995	-0.773352	-0.599291	0.264963	-0.453006	-1.01494	-0.35021	0.0834746	-0.217048	0.483046	-0.0690513	-0.186874	-0.0651966	-0.188175	-0.486957	-0.374474	-0.447118	0.0843298	-0.865703	0.244338	-0.296657	-0.428661	-0.158583	-0.182086	0.0810564	-0.58845	-0.0519173	0.0355746	-0.17895	-0.104338	-0.428614
chr1_23652094_23702573	-0.297129	-0.473162	-0.0375847	0.520801	-0.245916	0.421781	-0.450531	-0.24599	-0.485699	0.656165	-0.357473	-0.424047	-0.244497	0.138787	0.0495994	1.63417	0.192562	-0.155576	-0.394355	-0.40269	-0.587572	-0.0281543	-0.00191743	-0.663534	-0.395518	-0.020628	0.144907	0.128806	-0.291766	-0.166481	0.236288	-0.206915	-0.0588589	-0.201734	-0.405212	-0.125296	-0.167094	1.27867	-0.034678	0.575607	-0.38581	-0.199709	-0.298222	-0.354536	-0.217388	-0.120949	-0.295676	0.012111	-0.446608
chr1_23702573_23752944	0.0305359	-0.102592	-0.0482656	0.184474	0.200982	-0.122526	0.0407682	-0.33288	-0.262155	0.51285	-0.402854	-0.173181	-0.204288	0.00718128	-0.344891	1.08832	-0.185752	-0.201697	-0.0206607	-0.167492	0.140515	-0.248041	-0.0872984	-0.69131	-0.457058	0.140666	-0.134626	-0.535792	0.0636342	-0.304102	0.217131	-0.0843508	-0.0272576	-0.0201563	0.103734	0.0516552	-0.830361	0.597559	-0.325407	0.33761	-0.252614	-0.0411252	-0.0601165	-0.402849	0.244903	0.105243	-0.152715	-0.0334739	-0.104964
chr1_23752944_23803192	0.0775263	-0.00184005	0.42839	0.0897202	0.0211187	0.170643	-0.12544	-0.0921663	0.0501581	-0.0256751	-0.371311	0.229074	0.054981	-0.0716972	0.116846	0.327478	0.155409	0.149722	0.150732	-0.185496	0.141828	0.0547066	0.102088	-0.355824	-0.078582	0.0443399	-0.0559254	0.144626	0.155847	0.0817226	-0.0671248	0.305836	0.234824	0.0650056	-0.0176949	0.219525	-0.107726	0.348399	0.190328	-0.131133	-0.06073	-0.0609855	0.107503	0.44356	0.391617	-0.0546914	0.276362	0.0575491	0.287027
chr1_23803192_23854098	-0.028511	-0.318311	-0.788958	-0.141253	-0.0229253	0.062449	-0.215873	0.236931	-0.0961017	0.0474928	-1.08975	-0.216879	-0.336952	-0.195168	-0.490081	0.227304	-0.294873	-0.992608	-0.0337999	-0.202217	-0.256083	-0.624505	-0.63973	-1.32964	-0.513074	-0.0620803	-0.438062	-0.433387	-0.163628	-0.260199	-0.00227225	-0.427064	0.0464207	-0.30639	-0.552864	-0.0174054	-1.59488	0.318387	-0.396805	-0.580702	-0.520598	-0.279736	-0.192123	-0.440247	-0.173489	-0.31609	-0.307964	-0.0574087	-0.598597
chr1_23854098_23904448	-0.0045075	-0.309923	-0.117932	0.541099	-0.289214	0.353421	-0.561712	0.152257	-0.184636	0.583929	-0.107066	-0.294679	-0.332007	0.0623951	0.00782414	0.805593	-0.0375167	0.047694	-0.0574195	-0.0794137	0.347259	-0.17777	-0.466735	-0.723525	-0.248823	-0.0720851	-0.220419	0.126571	-0.00486367	-0.344979	-0.403131	-0.103328	-0.389623	-0.0542301	-0.233273	0.125318	0.033274	0.38202	-0.00270359	0.507765	-0.292057	-0.187919	-0.377598	0.123221	0.34584	-0.0211256	-0.160611	-0.0766136	-0.0341164
chr1_23904448_23954961	-8.4638e-05	-0.220345	-0.980556	-0.33142	-0.117849	-0.448296	-0.093905	-0.0922076	-0.0701418	-0.00163863	-0.817609	0.0602935	-0.290264	-0.267935	-0.462453	-0.92645	-0.980741	-0.613419	0.0011119	-0.737761	-0.44242	-0.446957	-0.581518	-0.794854	-0.361229	0.0616715	-0.318393	-0.676752	-0.372699	-0.0128705	-0.218804	-0.0121208	-0.125213	-0.363385	-0.394964	0.0745208	-1.25487	-0.246299	-0.359696	-0.585947	-0.609589	0.00201975	0.0915417	-0.261031	0.0201163	-0.154128	-0.382381	-0.398589	0.0501015
chr1_23954961_24005465	0.0237671	-0.268411	-0.0480756	-0.0302088	0.143069	-0.264867	-0.267588	-0.208369	0.014666	-0.0650641	-0.619081	-0.0639918	-0.137979	-0.216721	-0.452263	-0.287516	-0.457188	-0.675088	-0.0454232	-0.700043	-0.370709	-0.136448	-0.0486053	-0.83757	-0.356657	-0.00166881	-0.398483	-0.765155	-0.0613034	-0.109739	0.232131	-0.0937923	0.138107	0.166467	-0.0433047	-0.201505	-1.51551	0.0498309	-0.18354	-0.878241	0.0725656	-0.0349802	0.0458844	-0.0662318	-0.169433	-0.258769	-0.0167462	-0.230117	0.00929709
chr1_24005465_24056500	-0.492138	-0.39016	-0.0402477	-0.415673	-0.24923	-0.707138	-0.320891	-0.260562	-0.216115	-0.620033	-0.466091	-0.408109	-0.470676	-0.627767	-0.590549	-0.241909	-0.00676057	-0.389324	-0.484085	-1.11745	-0.588186	-0.196866	-0.197334	-1.19495	-0.778566	-0.256934	-0.505716	-0.526445	-0.326942	-0.241002	-0.147699	-0.222716	-0.480795	-0.262734	-0.73934	-0.537253	-1.50838	-0.261685	-0.59344	-0.876529	-0.712657	-0.395081	-0.45611	-0.430822	-0.322179	-0.4316	-0.45159	-0.587279	-0.511071
chr1_24056500_24106949	-0.124656	-0.177609	-0.346878	0.541109	-0.124225	0.0782736	-0.231941	-0.0384402	-0.195883	0.698145	-0.0909523	-0.166951	-0.528446	0.0134545	-0.320684	0.587789	-0.0626901	-0.249493	-0.355462	-0.0773504	0.0374264	0.143898	-0.0630723	-0.984087	-0.503125	-0.393845	-0.0390227	-0.492415	-0.0105459	-0.0293274	0.0869435	-0.103204	0.0824973	-0.0882159	-0.268322	0.0361102	-0.803636	0.629575	-0.415587	-0.0344186	-0.357742	-0.199726	-0.463046	0.297518	-0.0342202	-0.137655	-0.408755	-0.200538	-0.0328868
chr1_24106949_24157485	-0.151749	-0.229901	0.0520867	0.521627	0.0934738	-0.0830085	-0.133164	-0.203661	-0.156294	0.346514	0.202568	-0.153472	-0.0124382	-0.0117581	0.0597429	0.345636	0.198688	0.26613	-0.312306	-0.393303	0.0996733	0.0259805	-0.138668	-0.45519	-0.193126	-0.149864	0.1295	0.206906	-0.0996826	0.0997869	-0.234946	-0.0154035	0.011875	-0.0438775	-0.163904	0.288935	0.129306	0.34006	-0.128746	-0.00164065	-0.322301	-0.220314	-0.114685	0.0634881	0.400712	-0.118747	-0.0579479	-0.247159	-0.147804
chr1_24157485_24208873	-0.349962	-0.351149	-0.109861	0.727773	-0.0923171	0.88028	-0.587558	-0.651665	-0.44555	0.976675	0.254462	-0.691516	-0.398593	0.301808	-0.257162	1.98496	-0.0811509	-0.160704	-0.175398	0.251138	-1.08497	0.428603	0.731524	-0.69737	-0.302305	0.244966	0.036784	0.417359	-0.301836	-0.280711	0.0738024	-0.081732	-0.614259	-0.162505	-0.0589914	-0.484956	0.824395	1.47286	-0.357543	0.840058	-0.272711	-0.327706	-0.258508	-0.117946	-0.397966	0.345518	-0.615367	-0.936598	-0.407473
chr1_24208873_24259262	-0.267347	0.225319	-0.773409	0.174739	-0.325694	-0.0777922	-0.383961	0.392956	-0.0584461	0.236444	-0.35915	-0.632629	-0.211321	-0.0753191	-0.120358	0.730596	-0.359489	-0.0668792	-0.0618737	-0.0448099	-0.251196	-0.182897	0.0933388	-1.07367	-0.571845	-0.0422908	-0.145697	0.177187	-0.295523	0.11038	0.141886	-0.0136531	-0.127637	-0.204469	-0.273508	-0.272409	-0.642694	0.797613	-0.208929	-0.191245	-0.69333	-0.0992413	-0.360189	0.181951	0.244949	-0.0264579	-0.267484	-0.0595624	-0.198427
chr1_24363269_24413731	-0.042951	0.367404	-0.671575	-0.067327	0.13821	0.208849	0.288359	0.138914	-0.121263	0.0494102	0.248765	0.348013	0.236784	-0.124486	0.11039	-0.0174357	0.296615	0.0725302	0.217815	-0.849121	0.0544998	-0.2503	-0.140272	-0.521704	-0.175908	0.0806003	-0.00117884	0.324486	0.188519	0.117849	0.306979	-0.0401199	0.257727	0.166016	-0.0516166	0.163519	-0.503817	-0.0724119	0.0365752	-0.180807	0.182529	0.180981	0.0636516	0.325369	0.410409	-0.0509822	0.192386	0.0517681	-0.0425071
chr1_24413731_24463825	0.234653	0.242843	0.0886769	-0.666076	0.253827	-0.354545	-0.100366	-0.284689	0.301115	-0.337532	0.146788	0.0739689	0.241032	-0.0547526	-0.194247	-1.33494	-0.0619456	-0.201175	0.096968	-0.798924	0.308109	-0.283282	-0.323198	-0.333476	0.271565	0.0706186	-0.238733	0.0358766	0.322589	0.461023	-0.0999436	0.165993	0.25932	0.32358	-0.0743073	0.632891	-1.33116	-0.352528	0.0732718	-0.79525	0.177625	0.295694	0.118147	-0.19392	0.729325	-0.00222029	0.165151	-0.117536	0.0275056
chr1_24463825_24514094	-0.211203	-0.215879	-0.903757	0.307751	0.0548751	-0.0231216	-0.0986974	-0.952422	-0.12988	0.186247	-0.686573	-0.198828	-0.358313	0.0364655	-0.286668	-0.217565	-0.447875	-0.953368	-0.246298	-0.451511	0.270128	-0.636215	-0.663224	-0.900624	-0.458909	0.132265	-0.547649	-0.515055	-0.157179	-0.0999499	-0.294342	0.0391027	-0.101465	-0.0246337	-0.14313	0.123704	-0.814713	0.0897288	-0.221752	-0.567602	-0.347844	-0.120518	-0.00292788	-0.309512	0.0795033	-0.217344	-0.136399	0.101633	-0.532344
chr1_24514094_24564533	0.0934589	-0.143552	-0.225199	-0.265454	0.109385	-0.208359	0.166888	0.140001	0.178524	-0.053118	-0.186853	0.0748656	-0.00771345	-0.530399	0.0447974	-0.240414	-0.455156	0.145808	0.0338047	-0.960214	0.346815	-0.379917	-0.148107	-0.505767	-0.223474	0.025761	-0.0838956	-0.188866	0.295624	-0.18385	-0.189551	0.200297	0.203824	0.0867495	-0.146408	0.188713	-1.00259	0.108277	-0.224151	-0.265119	-0.0784225	-0.0254491	-0.0220946	-0.0249556	0.436418	-0.0523546	-0.0174031	-0.223893	-0.0725133
chr1_24564533_24615113	-0.102236	-0.191707	-0.178242	-0.116358	0.299513	-0.0643506	-0.07719	0.173466	0.00192632	-0.0905315	-0.544009	-0.112549	-0.379948	-0.0581847	-0.298487	-0.416265	-0.220551	-0.495021	0.268297	-1.23864	-0.375643	-0.468297	-0.336802	-0.690421	-0.273391	0.0741738	-0.158067	0.0529708	-0.113688	-0.282734	0.227585	-0.0203859	-0.281505	-0.404276	-0.396083	-0.0929684	-0.885103	0.0764518	-0.327134	-0.137113	-0.158133	-0.149148	-0.131431	-0.269871	-0.356185	-0.298132	-0.428556	-0.073872	-0.00150777
chr1_24615113_24665239	-0.0710844	-0.0179194	-1.1076	-0.195364	0.0110716	-0.14107	-0.265611	-0.14219	0.00831405	0.707189	-0.141399	-0.167105	-0.169629	-0.0355692	-0.412415	0.420365	0.133507	-0.207286	-0.024336	-0.502069	0.229007	0.0913179	0.134765	-0.545176	-0.0119411	0.173554	-0.341388	-0.108405	0.00512069	0.167119	-0.1112	-0.160338	-0.201204	-0.247219	-0.365113	-0.211585	-0.824376	0.764044	-0.482384	0.00154106	-0.240115	-0.0540652	-0.0649898	-0.442209	-0.0337262	-0.0847565	-0.105672	-0.0680297	-0.237518
chr1_24665239_24715457	0.321631	-0.202543	-0.466631	-0.65432	0.239809	-0.465754	-0.349185	0.0593961	0.0640317	-0.494218	-0.876751	0.0930849	-0.296718	-0.328327	-0.131318	-1.07811	-0.414655	-0.54628	-0.178045	-0.821702	0.186893	-0.274501	-0.718564	-0.866569	-0.0229664	0.246518	-0.900223	-0.809321	0.276565	0.309956	-0.286992	-0.0347333	0.262582	0.0904139	-0.232498	0.228599	-1.48799	-0.738034	-0.557452	-0.773694	-0.467553	0.134976	-0.0780582	-0.127164	0.336175	-0.167134	-0.138574	-0.246059	0.0196068
chr1_24715457_24765651	-0.317954	-0.0363444	0.76524	0.0347732	-0.0915573	-0.182074	-0.243089	-0.548765	-0.452465	-0.136807	0.927986	-0.0246496	0.0234306	-0.0535532	-0.183061	-0.418529	-0.0691658	0.911159	-0.194314	-0.802268	-0.208877	0.345144	-0.902336	-0.511763	0.0431599	-0.070309	0.276426	0.813426	-0.0894274	0.108081	0.135569	-0.0911864	0.130172	0.120106	-0.0766143	0.051175	0.258136	-0.0235916	-0.185411	0.846332	-0.358269	-0.094304	-0.219822	-0.757855	0.0564376	-0.0463489	-0.211012	0.00141272	-0.0449225
chr1_24765651_24815806	-0.0101265	0.0410371	-0.794894	-0.501936	-0.159566	-0.38768	-0.257687	-0.237406	0.0320411	-0.00859089	-0.479476	0.0634338	-0.130808	-0.0185646	-0.271706	-1.05584	-0.425067	-0.0933204	0.183476	-0.66369	0.106474	-0.597153	-0.927166	-0.864789	-0.136837	-0.338427	-0.586209	-0.529786	0.0787807	0.345578	0.262119	-0.179051	0.138522	-0.0858169	-0.462754	0.115265	-1.03332	-0.327593	-0.301503	-0.630408	0.032509	-0.0368989	-0.094718	-0.19338	-0.120292	-0.184007	-0.190133	-0.264444	0.0272008
chr1_24815806_24866239	-0.116924	0.296169	0.446073	0.842696	-0.112697	-0.593467	-0.172452	-0.0974928	-0.214362	0.0645975	0.586603	0.0036498	0.0687885	0.100885	0.247532	1.4431	0.187204	0.410083	-0.034845	-0.351969	0.0381116	-0.311716	0.0222081	-1.04416	-0.260113	-0.0900263	-0.0544655	0.202645	0.0108108	-0.593763	-0.283937	-0.165277	-0.111448	-0.105199	-0.278797	-0.146983	-0.215425	0.476562	-0.406573	0.62214	-0.0638668	-0.0944279	-0.0398474	-0.208184	0.0186758	-0.116918	-0.263459	-0.123132	-0.428612
chr1_24866239_24916417	-0.25092	-0.0258468	-0.126781	-0.179515	-0.138821	-0.0936805	-0.220649	-0.216724	-0.170162	-0.579327	-1.06422	-0.224166	-0.375652	-0.190517	-0.243559	-0.953745	-0.235261	-0.319182	0.087447	-0.775566	0.271562	-0.372119	-0.376238	-0.779996	-0.75746	-0.0336379	-0.473876	-0.565081	-0.109826	-0.481388	-0.459737	-0.183265	-0.114355	0.00342557	-0.414831	-0.173523	-1.13433	-0.638417	-0.445292	-1.26925	-0.0735764	-0.19596	-0.240017	-0.469171	0.162454	-0.547587	-0.4359	-0.666259	-0.032554
chr1_24916417_24967166	-0.238157	-0.306421	-0.642466	-0.509115	-0.340762	-0.617029	-0.256377	-0.241378	-0.416352	-0.207063	-0.295105	-0.302271	-0.451341	-0.32404	-0.4712	0.684335	-0.636022	0.165451	-0.382029	-0.369231	-0.148542	-0.339353	-0.235865	-0.886802	-1.03544	-0.171457	-0.312241	-0.474187	-0.0723829	-0.468174	-0.258707	-0.737598	-0.373342	-0.269163	-0.502082	-0.485275	-1.14496	0.458742	-0.834102	-0.423479	-0.684294	-0.514287	-0.487374	0.0570556	-0.416123	-0.632404	-0.351429	-0.194036	-0.426886
chr1_24967166_25017949	-0.223275	-0.409717	0.0406096	0.116974	-0.320054	-0.457283	-0.368682	-0.62875	-0.397836	-0.018606	-0.0479688	-0.311663	-0.305035	-0.642569	-0.242936	-0.00615279	-0.252516	0.12807	-0.428925	-1.05009	0.0384661	-0.548476	-0.113252	-0.907347	-0.667229	-0.201294	-0.153876	-0.286906	0.0511912	-0.120491	-0.503906	-0.35263	-0.40129	-0.128809	-0.439417	-0.607646	-0.87017	0.00149698	-0.527727	-0.460839	-0.775855	-0.335202	-0.359923	-0.0409235	-0.206368	-0.10068	-0.624162	-0.401606	-0.426876
chr1_25017949_25068247	-0.278254	-0.447716	-1.40042	-0.134727	-0.289653	-0.450119	-0.355503	-0.146119	0.058486	-0.0765767	-1.07791	-0.0715479	-0.635818	-0.0731043	-0.58142	0.417768	-0.497773	-0.927939	-0.179987	-0.165076	-0.146934	-0.577822	0.0335043	-1.15584	-0.837339	0.176495	-0.856824	-0.257113	-0.603342	-0.114277	-0.450912	-0.411926	-0.261176	-0.0718426	-0.561251	-0.538715	-1.01226	0.671999	-0.612833	-0.551679	-0.543566	-0.271039	-0.114629	0.0128058	-0.201424	-0.0921429	-0.515662	-0.467668	0.0753551
chr1_25068247_25118721	-0.493698	-0.489741	-0.472684	0.385714	-0.515521	0.535177	-0.580919	-0.161673	-0.414806	0.429379	0.0872702	-0.35701	-0.296603	-0.209919	-0.150736	1.18619	-0.404517	-0.247617	-0.240498	-0.237389	-0.616307	-0.653064	-0.0710892	-0.972385	-0.789807	-0.335715	-0.267001	-0.0714583	-1.00716	-0.301105	-0.258685	-0.354539	-0.21294	-0.624776	-0.340203	-0.366589	-0.0811821	0.895391	-0.649316	-0.536395	-0.390593	-0.547417	-0.965039	-0.238953	-0.329802	-0.0838933	0.0640904	-0.0889453	-0.0817196
chr1_25118721_25171486	-0.385233	-0.467363	-0.759213	0.00515903	-0.401683	-1.0699	-0.54345	-0.258963	-0.488439	-0.251023	-0.50342	-0.465227	-0.341968	-0.11541	-0.217781	0.0996793	-0.307222	0.0565408	-0.392717	-0.82602	-0.44679	-0.253986	-0.419289	-0.798567	-0.580082	0.0909454	-0.510429	-0.230176	-0.448842	-0.610638	-0.577499	-0.252375	-0.00343267	-0.549737	-0.644449	-0.245757	-0.891967	0.337863	-0.415832	-0.761104	-0.0962859	-0.308032	-0.223878	-0.491841	-0.400873	-0.272226	-0.726053	-0.003464	-0.159171
chr1_25171486_25221613	0.10554	0.161902	-0.298727	0.372693	-0.02483	-0.324311	-0.016123	-0.0950769	-0.00690752	0.312811	0.608547	-0.11561	-0.144654	0.203448	-0.17626	0.449785	-0.12635	0.153915	0.021837	-0.0656648	0.331497	-0.0535594	-0.138004	-0.840496	-0.0204206	-0.204762	-0.0382263	0.396924	0.0862199	0.354556	0.481633	0.16573	-0.338561	0.060454	-0.339422	0.442278	-0.257434	0.570369	-0.328059	0.0516604	0.280145	0.0169216	0.180966	0.160083	0.145216	-0.171609	-0.145038	0.00639741	0.000743201
chr1_25221613_25271631	0.101432	0.0748772	0.369839	0.00219584	-0.0257951	0.049861	0.00575919	-0.0239521	-0.0983139	0.359402	-0.125075	0.15264	-0.126215	0.324996	-0.0794961	-0.0556189	0.174642	0.105285	0.0201231	-0.0247573	0.0756346	0.0507512	-0.0846554	-0.332367	0.200395	0.256809	0.0210073	-0.076139	0.133805	0.226107	0.624741	0.17038	0.32735	0.0606802	-0.31902	0.243612	-0.365221	0.369638	0.122981	0.220956	0.0437362	0.170778	0.302978	-0.221464	0.321556	0.0688673	-0.1009	-0.129994	-0.128581
chr1_25271631_25321670	-0.0440056	-0.233081	0.604774	-0.106294	-0.0995337	-0.339677	-0.114116	-0.283224	-0.0278946	-0.568638	-0.286867	0.0625878	-0.149011	-0.188906	-0.0727178	-0.896836	-0.306486	-0.145138	-0.231629	-1.15375	-0.0432902	0.128971	-0.7874	-0.379566	-0.0393288	-0.126244	-0.329502	0.109514	-0.0482149	0.240817	-0.632363	-0.11418	-0.266325	-0.115241	-0.20432	-0.157103	-0.988271	-0.764186	0.0775189	-0.377479	0.0997563	-0.0619744	0.10259	0.171999	0.00949748	-0.390987	-0.221043	-0.114061	0.0583235
chr1_25321670_25371888	0.0494154	-0.0671454	0.00396497	-0.644426	0.0192124	-1.03432	-0.0113638	0.283421	0.164728	-0.529127	0.0443714	0.122017	0.0106213	-0.383145	-0.184649	-1.65639	-0.467895	0.104185	0.0327189	-1.20308	-0.0881038	-0.624298	-1.64393	-0.896862	0.0632652	-0.144126	-0.148629	0.184801	0.0505922	0.230533	-0.470021	0.0787263	-0.486785	0.0688987	-0.293429	0.054559	-1.45572	-0.82737	0.0162594	-1.38541	-0.122635	0.0126726	0.274285	-0.371189	0.119457	-0.47987	-0.295847	-0.023614	-0.390107
chr1_25371888_25423530	-0.0378637	0.216871	0.573348	-0.122593	0.00778147	-0.0726824	0.0852076	0.186331	0.0137208	-0.0875375	0.570807	0.0856045	0.291568	0.0104681	-0.226096	-0.80576	-0.149203	0.632234	0.0790678	-0.899069	-0.0941112	0.332054	-0.416983	-0.406244	0.363792	-0.0588727	0.152423	0.625995	0.0504105	0.31087	0.0450184	-0.0682536	0.140569	0.0571739	-0.196139	-0.0461571	-0.993659	-0.416048	-0.245542	0.107493	0.381312	0.153486	0.0363538	-0.305326	-0.0628088	-0.360888	0.172806	-0.137843	0.306688
chr1_25423530_25473891	-0.0385966	-0.0698988	0.245719	-0.44273	0.107413	-0.0883716	-0.217471	0.310813	-0.226462	-0.368288	-0.406857	-0.0893934	-0.0170465	-0.500083	-0.440943	-1.14659	-0.0595903	-0.347493	-0.297499	-0.392095	-0.0391453	-0.0925912	-0.632528	-0.852774	-0.226634	-0.34275	-0.250003	-0.314973	-0.346651	0.0591748	-0.45387	0.0721623	-0.483295	-0.186136	-0.396563	0.0714056	-0.966202	-0.26122	-0.213012	-0.374929	-0.0677736	-0.0728094	-0.101989	0.0559268	0.056324	-0.41415	-0.114919	-0.120609	-0.481184
chr1_25473891_25524032	0.0687201	0.0182116	0.96321	-0.12515	-0.0210109	0.113507	0.0532527	-0.0153788	-0.0649242	-0.0359954	0.455551	0.120818	0.0651563	-0.0312635	0.080387	-0.343353	0.00297065	0.203515	0.0322403	-0.843704	0.151767	-0.593512	-0.509664	-0.861877	-0.10711	-0.045028	0.207434	0.297763	-0.159589	-0.0487898	0.0784942	0.00611995	-0.1366	0.066175	-0.177935	0.396016	-0.807368	0.321434	-0.4106	-0.104289	0.116282	-0.106869	0.0871125	0.724893	0.340696	-0.413514	0.0171765	0.376554	0.138776
chr1_25524032_25574579	-0.177013	-0.109129	0.100515	-0.0280455	-0.238598	-0.53227	-0.219377	-0.0836932	-0.63409	0.0241707	-0.0819248	-0.448898	-0.509017	0.0417405	-0.171988	0.622519	-0.00762837	0.0824602	-0.107863	-0.710443	-0.517251	0.203457	-0.487623	-0.788294	-0.434323	-0.2159	0.0963852	-0.00374191	-0.22897	-0.428985	0.0502216	-0.200491	-0.0107557	-0.39297	-0.475421	0.0436533	-0.103717	0.208313	-0.321378	0.430967	-0.447672	-0.124393	-0.0897316	0.253833	-0.102273	-0.098175	-0.371735	-0.283876	-0.547089
chr1_25574579_25624914	-2.14953	-1.98674	-1.38117	-1.17424	-1.78843	-1.20745	-2.32075	-1.14762	-1.52936	-0.85595	-1.80446	-1.35893	-1.59934	-1.36036	-1.56425	-0.957471	-1.35515	-1.16457	-1.70802	-2.44106	-1.01011	-1.19302	-1.08303	-3.52788	-2.01386	-1.28636	-2.15904	-1.4613	-1.29494	-1.52755	-2.24051	-1.54588	-1.25788	-2.07697	-2.59595	-1.24217	-2.5856	-1.10223	-1.77937	-2.69313	-2.31092	-1.50515	-1.65335	-1.2421	-2.20442	-1.64486	-1.79595	-1.41735	-1.4921
chr1_25624914_25675240	-1.55593	-1.4515	-1.48611	-1.27535	-1.37439	-0.650693	-2.27333	-1.11998	-1.90448	-1.00902	-1.5037	-1.91113	-1.21609	-1.02145	-1.31133	0.230165	-1.42276	-1.16866	-2.17772	-3.08484	-2.88427	-1.10008	-0.780612	-3.1314	-1.36686	-1.8063	-1.83134	-1.30919	-1.35254	-2.10263	-1.61186	-1.29551	-1.75407	-2.22947	-2.78576	-1.57341	-1.85841	-1.21576	-1.9712	-0.993385	-1.89381	-1.57294	-1.28097	-1.19376	-1.90731	-2.03861	-1.68408	-1.233	-2.2931
chr1_25675240_25725444	-1.2484	-1.02998	-1.18188	-0.994682	-0.940577	-1.15825	-1.03141	-1.49861	-1.15064	-1.18291	-3.25058	-1.31236	-0.914181	-1.07414	-1.01454	-1.33614	-1.95335	-1.25664	-1.02923	-1.92331	-1.89009	-1.17324	-2.28091	-1.4911	-1.95297	-0.767093	-1.09689	-1.42599	-0.880152	-1.21889	-0.453479	-0.734579	-0.977075	-1.14315	-1.05115	-1.48119	-2.76163	-1.44812	-1.05385	-1.33424	-1.16237	-1.03247	-1.32118	-0.656674	-1.28228	-1.83799	-0.982541	-1.22845	-1.29304
chr1_25725444_25775755	-0.995793	-0.505593	-0.402576	0.139174	-1.138	0.355594	-1.14983	0.295061	-1.04944	0.324413	0.0814178	-1.11784	-0.663287	-0.367962	-0.625819	0.909222	-0.540827	-0.311877	-0.535283	-0.350602	-0.589252	-0.150182	0.162386	-0.987261	-0.646319	-0.307456	-0.357381	0.245111	-0.911835	-1.28722	-0.298172	-0.943823	-0.151965	-0.945557	-1.04068	-0.926914	-0.461033	0.321587	-1.01245	0.46656	-0.712707	-0.705995	-1.31913	-0.445629	-0.676857	-0.787952	-0.461715	-0.64098	-0.807956
chr1_25775755_25826234	-0.237206	0.171205	-0.00296981	-0.285677	-0.0540865	-1.84977	-0.355521	0.0834095	-0.127249	-0.258022	-0.512124	-0.171742	-0.53683	-0.304913	-0.591544	0.0606839	-0.13135	-0.0364919	-0.355719	-0.613164	-0.736244	0.0779913	-0.366913	-0.747195	-0.423143	-0.124494	-0.157626	-0.381815	-0.349775	0.12355	0.258944	-0.255057	-0.216268	-0.0369891	-0.342754	-0.055271	-0.964653	-0.349003	-0.0376394	-0.493891	-0.193055	-0.0444826	-0.311609	-0.0667257	0.0733322	-0.239148	-0.315372	0.204199	-0.218526
chr1_25826234_25880612	0.105437	0.0500026	0.139955	-0.0349747	0.278178	0.585259	0.14823	0.871461	-0.146282	0.287324	-0.151035	0.0238381	-0.081528	0.154422	0.145784	0.589903	-0.0171774	-0.205194	-0.127	-0.35247	0.383549	0.105956	-0.113684	-0.681253	-0.0450583	0.186954	-0.172779	-0.0348321	0.0180437	0.276425	0.2569	0.130639	-0.00132505	0.183029	-0.121366	-0.0342261	-0.37938	0.709202	0.017879	-0.135169	0.269359	0.00122124	0.085833	0.154925	0.236237	-0.133774	0.0722279	0.188298	-0.0605068
chr1_25880612_25931627	0.127573	-0.139212	0.0114374	-0.52353	-0.184021	-0.234876	-0.253135	0.0315333	-0.0917752	-0.494695	-0.102657	-0.345191	-0.196445	-0.15109	-0.141008	-1.10934	0.427299	-0.222771	-0.327808	-0.993248	-0.144511	-0.185245	-0.652062	-0.922064	0.0807076	-0.39444	-0.27471	-0.168248	-0.133954	-0.238586	-0.369147	-0.10567	-0.114948	-0.0554465	-0.442934	-0.235641	-1.76625	-0.445277	-0.659758	-0.998357	-0.314703	-0.0627166	0.0189704	-0.597857	0.16866	-0.68677	-0.13512	-0.295239	-0.449334
chr1_25931627_25981817	-0.0366143	-0.118056	-0.129255	0.790248	0.017599	0.414432	-0.45299	0.791334	-0.277948	0.889163	0.199724	-0.372496	-0.321363	0.344416	0.0836018	1.11539	-0.124914	0.560229	-0.0299865	0.123508	-0.195019	0.562969	0.32031	-0.502686	0.121016	0.27507	-0.120747	0.00227282	-0.125379	-0.132489	0.533189	-0.0839024	-0.0570475	0.0134828	-0.086018	-0.692093	0.0729562	1.0303	-0.333061	0.713637	-0.0912331	-0.0399097	-0.218114	1.01986	-0.0445708	0.151902	0.070761	-0.234791	-0.0944722
chr1_25981817_26032001	0.223324	-0.0257232	-0.169504	-0.256851	0.163429	0.185321	-0.189081	-0.145889	0.055363	-0.0516699	0.162212	0.11146	0.277677	-0.0464512	-0.0538407	-0.695402	0.0475853	-0.105236	0.126634	-1.01346	-0.0880217	-0.227309	-0.48606	-0.772274	0.107484	0.147513	-0.506199	0.119562	-0.01766	-0.0771599	-0.488957	0.0801318	-0.00991866	0.175013	-0.11527	-0.00659892	-1.09674	0.0341654	-0.225298	-0.729178	-0.351043	0.144334	0.312408	-0.0591385	0.255999	0.0865933	-0.0915408	0.130304	0.222037
chr1_26032001_26082190	0.162838	0.175355	0.282696	-0.467691	-0.235345	-0.368003	-0.013566	-0.204507	0.238143	-0.678907	-0.03729	0.211938	-0.0484053	-0.146789	-0.0509871	-0.39309	0.0264576	-0.649506	0.0384123	-0.734787	-0.314504	0.141643	-0.264162	-0.463236	-0.0396673	0.180855	-0.289575	-0.280688	-0.0441741	-0.0690079	-0.409799	0.103346	-0.154898	0.245957	-0.0483417	0.0693233	-1.28056	-0.194486	-0.0665521	-0.248063	-0.0255218	0.0495122	0.138786	0.0600511	0.302644	-0.367013	0.034811	-0.476923	-0.0639851
chr1_26082190_26132248	-0.145154	-0.654771	-0.283155	-0.474532	-0.166993	-1.22476	-0.351573	-0.289342	-0.173174	-0.462573	-0.438187	-0.304089	-0.376213	-0.159329	-0.185296	-0.905014	-0.165003	-0.457472	-0.444836	-0.804783	0.347745	-0.577094	-1.25055	-0.639888	-0.294758	-0.01527	-0.303691	-0.630598	-0.365214	0.0391386	0.00733784	-0.263393	-0.262999	-0.212906	-0.227957	-0.253545	-1.30792	-0.494102	-0.177349	-0.483964	-0.3845	-0.116337	0.192839	-0.349472	0.156235	-0.2688	-0.19082	-0.35414	-0.0156881
chr1_26132248_26182400	-0.131288	-0.118302	0.814816	0.778051	-0.330198	0.160438	-0.137198	-0.272712	-0.109223	-0.000758531	1.02757	-0.4286	0.205401	0.0740538	0.492049	0.935504	-0.320431	1.05541	0.115408	-0.554722	-0.647996	0.552677	0.309871	-0.098272	0.172736	-0.0104888	0.57279	0.635885	0.0452163	0.10648	-0.156972	-0.217937	-0.154851	-0.272575	-0.106096	0.0996111	0.452504	0.187845	-0.442565	0.477177	0.46647	-0.252035	-0.157768	-0.218001	0.121672	-0.322281	-0.00807099	-0.434402	-0.0556988
chr1_26182400_26232628	-0.107777	-0.42521	-0.551386	-0.161879	-0.200696	0.530134	-0.254051	0.152296	-0.253985	0.420196	-0.182599	-0.190671	-0.216161	-0.0607427	-0.0371269	0.937853	-0.67814	-0.321306	-0.243224	-0.140466	-0.440299	-0.383293	-0.0632527	-0.678069	-0.455604	-0.407921	-0.243488	-0.208974	0.0312834	-0.651421	0.0115321	-0.33855	-0.0270681	-0.178691	-0.113023	-0.0445315	-0.306623	0.512785	-0.241743	0.154162	-0.500178	-0.205753	-0.152073	-0.0606199	0.12792	-0.104716	-0.734495	-0.246348	-0.00707328
chr1_26232628_26282914	-0.26947	0.104655	0.189899	-0.0749199	-0.364964	-0.573101	-0.109925	-0.0364875	-0.268305	0.157414	-0.226272	-0.324391	-0.10086	-0.569876	-0.136983	0.195787	-0.0495522	-0.024684	0.0455655	-0.641828	-0.323343	-0.126784	-0.618094	-0.626431	-0.557391	-0.15139	0.152598	-0.471666	-0.352384	-0.183366	-0.943114	-0.155772	-0.0182074	-0.0693898	0.0578091	-0.474514	-0.551383	0.0945616	-0.262106	0.322772	-0.0248754	-0.0997257	-0.256526	0.149608	-0.0722158	-0.281132	-0.14732	-0.301484	-0.258674
chr1_26282914_26333284	-0.0579342	0.0287014	-0.34704	-0.241907	-0.0101155	-0.683685	-0.232	-0.844409	-0.0159471	-0.318243	-0.448465	-0.0591846	-0.107767	-0.161682	-0.143249	0.0227231	-0.342586	0.157846	-0.162903	-0.449313	-0.216051	0.274933	-0.196301	-0.67492	-0.188104	0.0210441	-0.0391477	-0.34849	0.00851024	-0.136277	-0.012508	-0.0814428	-0.274386	0.150902	-0.177084	0.00663434	-1.1062	-0.0445203	-0.0220881	-0.336887	-0.0223733	-0.031447	-0.0604114	0.120969	0.0692522	-0.30931	-0.276387	-0.264702	0.0527443
chr1_26333284_26383427	-0.0581714	0.0931631	-0.21728	0.21095	-0.11891	0.131925	-0.0973913	0.44062	-0.249871	0.206991	-0.457482	-0.146522	-0.137087	-0.0262545	-0.285931	0.663085	0.16514	-0.192267	-0.241692	-0.300021	-0.196697	-0.162242	-0.167665	-0.650665	-0.30969	0.190454	-0.0922356	-0.267571	0.0581924	-0.115584	0.0997199	-0.0294799	0.00570054	0.158059	-0.0947454	-0.0523624	-0.163257	0.709746	-0.17002	0.43912	-0.214269	0.0658131	-0.0345679	-0.361462	0.156617	0.236096	-0.0470171	0.228944	-0.280255
chr1_26383427_26433744	-0.214419	-0.33797	-0.771363	-0.378122	-0.131466	0.125168	-0.288985	-0.318769	-0.377987	-0.225514	-0.865292	0.265622	-0.130655	-0.407096	-0.477322	-0.735972	-0.377686	-0.822713	-0.0839216	-1.00186	0.306462	-0.898478	-0.262755	-0.731858	-0.636917	-0.359639	-0.538478	-1.1979	0.113845	-0.270383	-0.161184	-0.235867	-0.402488	0.0137908	-0.450037	-0.128249	-1.13429	0.209194	-0.193985	-0.424154	-0.0122558	-0.179055	-0.197921	-0.118832	-0.145397	-0.12133	-0.541837	-0.242906	-0.44541
chr1_26433744_26484088	-0.130444	-0.469813	-0.552821	0.416201	-0.210467	0.282045	-0.394188	-0.133398	-0.458161	0.624069	-0.0739493	-0.0931414	0.00114713	-0.00943166	-0.108959	1.18973	-0.48185	-0.31135	-0.326271	-0.247664	0.13214	-0.564384	-0.130866	-0.71894	-0.44079	-0.0608542	-0.247575	-0.472919	-0.442441	-0.226498	0.489477	-0.404111	-0.225945	-0.309682	-0.258922	-0.161663	0.208726	0.971462	-0.502478	0.167533	-0.579305	-0.182034	-0.0906204	-0.445537	-0.234569	0.167707	0.0732133	-0.363476	0.0566371
chr1_26484088_26534602	-0.0307218	-0.152173	-0.469414	-0.0960852	-0.241361	0.167571	-0.266524	0.311843	-0.398984	0.440281	-0.925969	-0.0281786	-0.172533	-0.00170359	-0.24496	0.24451	-0.50209	-0.391124	-0.0463665	0.103124	0.01353	-0.123224	-0.272463	-0.665969	-0.671299	0.239689	-0.598561	-0.814841	-0.18758	-0.52546	0.273568	-0.0698128	-0.239976	-0.354202	-0.330292	-0.124976	-0.55489	0.756826	-0.249087	-0.62498	-0.530945	-0.0361835	0.00643489	0.314332	-0.284812	0.264676	-0.28144	-0.0657507	-0.0237268
chr1_26534602_26584817	-0.330199	-0.295199	-0.386035	-0.18468	-0.532881	-0.0726703	-0.594647	-0.502556	-0.314892	-0.287766	0.14754	-0.377271	-0.171371	-0.36705	-0.3913	1.0145	-0.371594	0.0560798	-0.42068	-0.595953	-1.08935	-0.612888	-0.204465	-0.682203	-0.693233	-0.273182	-0.845913	-0.263801	-0.693043	-0.450174	-0.703744	-0.395425	-0.499119	-0.376467	-0.191009	-0.185023	-0.00311369	0.0694271	-0.39199	0.435745	-0.15795	-0.4394	-0.521661	-0.37391	-0.628529	-0.662391	-0.657192	-0.0252477	-0.57645
chr1_26584817_26635102	-0.124967	0.0654784	-0.108098	0.087087	-0.0835326	-0.152704	-0.0200347	-0.111836	-0.410481	0.18841	0.137214	0.389709	0.184463	-0.18806	0.00784356	-0.246609	0.0607149	0.123825	-0.0603993	-0.457012	0.00522675	0.15807	-0.861698	-0.441665	-0.121984	0.0378477	-0.0482686	-0.18492	0.127854	-0.198575	-0.129686	-0.111635	0.154147	0.0546171	-0.282107	0.162744	-0.60449	-0.177977	-0.198882	0.0616337	-0.129208	-0.0503874	0.102647	-0.575822	0.198211	-0.138589	0.0856494	-0.00858469	-0.710859
chr1_26635102_26685399	-0.0350027	-0.124126	-0.0515696	-0.334381	0.0372753	-0.458777	-0.144728	-0.548452	-0.107908	-0.72317	-0.477189	0.0850265	0.00510786	-0.399888	-0.354371	-0.502407	-0.287505	-0.17332	-0.19742	-0.615379	0.00611574	-0.590141	-0.338761	-0.644412	-0.558786	-0.292837	-0.831447	-0.444905	-0.582334	0.196336	-0.404705	-0.104926	-0.20779	-0.0952646	-0.199642	0.154201	-0.56973	-0.450382	-0.0841334	-0.0775965	-0.282737	-0.176924	-0.0482338	-0.196969	0.0301994	-0.200277	-0.319793	-0.146551	-0.215995
chr1_26685399_26735706	-0.139924	-0.0349417	0.30069	0.58566	-0.00154611	0.64824	-0.126786	-0.401362	-0.184741	0.125424	0.231673	0.0215932	0.258107	0.10464	0.042504	0.908977	0.109077	0.352883	-0.16095	-0.397686	0.0550425	-0.160045	-0.344382	-0.319355	-0.636452	0.0148638	0.380375	0.357365	-0.2397	-0.097305	0.0679301	-0.00453043	0.0253358	-0.0661676	0.0217424	-0.0939262	0.308594	0.24004	-0.267446	0.753423	-0.339973	-0.310327	-0.305929	-0.475434	-0.210943	0.256159	-0.267727	-0.129396	-0.247042
chr1_26735706_26786155	-0.409499	-0.0838571	-0.0941334	0.399329	-0.221037	0.251595	-0.388827	-0.195175	-0.648522	-0.374163	-0.278225	-0.0535239	-0.377424	-0.439432	-0.65257	0.539485	0.109794	-0.213003	-0.510619	-0.782398	-0.517798	-0.417092	-0.325888	-1.03085	-1.08747	-0.0671091	0.120122	-0.618674	-0.100594	-0.868162	-0.223398	-0.517275	-0.0766052	-0.25376	-0.510558	-0.396458	-0.207257	0.257616	-0.522609	-0.00581484	-0.780107	-0.526826	-0.846303	-0.0684023	-0.333483	-0.180933	-0.400018	-0.0110096	-0.591208
chr1_26786155_26837390	-0.12012	-0.0259825	-0.127459	0.423263	-0.138912	0.71112	-0.0874987	-0.0535237	-0.543921	0.50974	-0.0410055	0.125531	-0.414344	0.00380015	-0.366668	1.2654	0.156533	-0.519069	-0.191219	-0.157694	-0.253928	-0.138168	0.00171763	-0.568708	-0.440825	-0.256097	-0.261351	-0.334775	-0.349036	-0.173471	0.0340469	-0.124753	-0.114453	-0.0954491	-0.275326	-0.0773669	-0.0355068	0.827917	-0.560801	0.20898	-0.558976	-0.225413	-0.412528	0.229303	-0.0841958	0.104357	-0.672048	-0.403473	-0.410999
chr1_26837390_26887932	-0.520807	-0.04984	-1.02307	-0.561487	-0.183977	-0.23341	-0.307469	-0.0677038	-0.394024	-0.133822	-0.979976	-0.149152	-0.235737	-0.613907	-0.656675	-0.159364	-0.480762	-0.789558	-0.240343	-0.59366	-0.0416151	-0.382326	-0.531663	-1.10712	-0.667108	-0.529085	-0.483219	-0.810624	-0.412363	-0.266315	-0.316028	-0.211738	-0.333433	-0.177921	-0.44222	0.00388016	-1.22272	-0.0421887	-0.516446	-0.836881	-0.220448	-0.201665	-0.319697	-0.139402	-0.0747032	-0.246273	-0.405033	-0.386008	-0.290116
chr1_26887932_26939534	-0.391907	-0.221432	-0.499411	-0.809817	-0.290268	-0.867276	-0.654272	0.442146	-0.355423	-0.315057	-0.0738531	-0.257181	-0.487602	-0.370132	-0.607163	-0.337061	-0.659306	-0.386391	-0.426522	-0.678451	-0.318961	-0.308345	-0.628117	-0.680377	-0.586864	-0.135569	-0.425792	-0.0333576	-0.33005	-0.331914	-0.687926	-0.250948	-0.222644	-0.450902	-0.417452	0.0824492	-1.21986	0.162782	-0.395735	-1.12202	-0.606368	-0.363653	-0.559842	-0.26888	-0.523306	-0.375367	-0.103847	-0.150591	-0.405756
chr1_26939534_26990387	-0.846924	-0.243989	-0.27061	-0.353751	-0.428845	-0.504927	-0.776519	-1.02353	-0.64479	-0.698852	-1.30047	-0.889521	-1.1069	-0.631867	-1.1897	-0.398511	-0.878561	-0.628862	-0.995328	-1.10425	-0.588558	-1.45074	-0.764213	-1.44577	-1.2309	-0.763855	-1.1471	-1.39189	-1.02777	-1.22542	-1.29765	-0.756216	-0.736714	-0.70196	-0.873254	-1.17729	-1.52823	-0.450535	-1.19871	-1.65892	-0.714401	-0.713275	-0.765213	-0.545495	-0.437298	-0.767405	-1.26896	-0.329086	-0.860777
chr1_26990387_27040607	-0.417194	-0.362257	0.0432117	0.379073	-0.405899	0.473598	-0.16056	0.418065	-0.533303	1.21116	-0.504221	-0.47119	-0.217053	-0.0317195	0.0317083	1.67381	0.0399471	0.0665302	-0.236089	0.316754	0.0519507	0.151533	0.903946	-0.798857	-0.489462	0.346864	0.00907203	-0.211425	-0.519981	-0.197294	0.289867	-0.118281	-0.205833	-0.55329	-0.366654	-0.313098	0.476604	1.49018	-0.286724	0.617868	0.163614	-0.0744592	-0.746618	0.477481	-0.320287	0.109162	-0.444623	-0.656802	-0.303296
chr1_27040607_27090942	-0.122829	-0.304884	0.437906	-0.474875	-0.0195598	-0.158125	-0.312272	-0.831749	-0.218858	-0.206767	0.150436	-0.081831	0.0341559	-0.350163	-0.157071	-1.1601	-0.220008	-0.386517	-0.217579	-1.01718	-0.588813	-0.627967	-0.562265	-1.35862	-0.280662	-0.332213	-0.214229	-0.47594	-0.290865	-0.28753	-0.757971	-0.0693948	0.0703752	-0.0981516	-0.422174	-0.143946	-1.46095	-0.32789	-0.413193	-1.03115	-0.275923	-0.0997241	-0.0909785	0.104824	0.00436746	-0.724556	0.0525758	-0.162769	-0.223637
chr1_27090942_27142294	-0.165471	0.0313207	0.455119	-0.178873	-0.115172	0.672978	-0.16645	-0.532529	-0.337015	0.432683	0.632062	-0.209434	0.135448	0.211181	-0.282768	0.978607	-0.132294	0.420477	0.0434267	-0.0255102	0.191567	-0.0419941	-0.0569032	-0.576793	-0.1394	-0.101576	-0.176498	0.387071	-0.144363	-0.343998	0.0497494	0.0507959	-0.063581	0.000891793	-0.260524	-0.137035	-0.588042	0.662986	-0.467883	0.376148	-0.084227	-0.172053	0.0922494	0.122132	0.311344	-0.410525	-0.0225105	-0.0880112	-0.02291
chr1_27142294_27194014	-0.222031	-0.190284	-0.306361	-0.584756	-0.00881433	-0.508214	-0.49036	0.332434	-0.220557	-0.211574	-0.771359	-0.344508	-0.402206	-0.40807	-0.549376	-0.898473	-0.779748	-1.31775	-0.295876	-0.554823	-0.0915651	-0.225068	-0.473854	-1.2217	-0.588834	-0.336454	-0.585453	-0.759624	-0.537825	-0.010489	-0.0426557	-0.229306	-0.683169	-0.133303	-0.448435	-0.234732	-1.02094	0.204459	-0.519932	-0.892229	-0.645573	-0.112737	-0.217965	0.397062	0.236846	-0.229322	-0.660195	-0.388933	-0.420806
chr1_27194014_27244733	-0.0191783	-0.289566	-0.561441	0.336472	0.0641263	0.192696	-0.22457	-0.394554	0.0240295	0.603383	-0.0770956	-0.135659	-0.071823	-0.173972	-0.132496	1.04045	0.304411	-0.144864	0.0853793	0.0887138	-0.655752	0.0633228	0.112015	-0.385939	-0.434252	-0.0362982	0.0519488	-0.268705	0.00715697	-0.110066	0.0422001	0.12727	0.0670984	-0.0116607	-0.187719	0.119495	-0.422701	0.875103	-0.353149	0.0901232	-0.508067	-0.229569	-0.230992	0.204235	0.330661	0.314824	-0.179922	0.136192	-0.0508839
chr1_27244733_27295153	-0.468751	-0.704831	-0.151006	0.221971	-0.0394972	-0.0415828	-0.146959	-0.153667	-0.325379	-0.123645	-0.532159	-0.518824	-0.543149	-0.0254684	-0.420304	0.548311	-0.236419	0.362436	-0.457667	-0.630276	-0.655782	-0.160729	-0.219074	-0.795375	-0.866363	-0.172205	-0.0372715	0.153984	-0.366046	-0.533873	-0.150685	-0.277862	-0.250375	-0.156785	-0.345872	-0.0984875	-0.150529	0.274861	-0.701168	0.489146	-0.411739	-0.449206	-0.191517	-0.247577	-0.235908	-0.265604	-0.395308	-0.647958	-0.429439
chr1_27295153_27345605	-0.102153	-0.0113994	-0.779696	0.0954452	-0.381933	0.599559	-0.0607861	0.134803	-0.212792	0.501022	-1.58987	-0.204999	-0.640855	0.1977	-0.375954	0.452013	-0.0570794	-0.711752	0.0643724	0.149598	0.00511433	-0.227322	0.237505	-0.844154	-0.604196	0.186628	-0.907925	-0.652806	-0.139847	-0.3393	-0.0310339	-0.262919	-0.255759	-0.539479	-0.0435691	0.466601	-0.415925	0.95335	-0.129275	-0.0501399	-0.381741	-0.314592	-0.339036	-0.249913	-0.0423367	-0.0599413	-0.285909	-0.0791898	-0.622763
chr1_27345605_27396954	-0.337246	-0.418866	-1.25028	-0.624092	-0.199614	-0.567285	-0.636588	-0.538109	-0.540498	-0.548706	-1.91997	-0.171198	-0.667525	-0.650773	-0.518097	-0.959417	-0.56282	-1.21216	-0.334588	-0.919243	-0.146533	-1.05773	-0.947052	-1.15666	-1.2086	-0.0917319	-1.35381	-1.81065	-0.625989	-0.0627256	-0.356373	-0.330063	-0.246407	-0.523676	-0.574993	-0.304283	-1.15916	-0.0984512	-0.653012	-1.10565	-0.819579	-0.3007	-0.38339	-0.102642	-0.0722227	-0.624301	-0.814864	-0.449034	-0.423093
chr1_27396954_27447308	-0.0661312	0.0411796	-0.277983	0.388903	-0.343877	-0.470754	0.0787619	-0.217888	0.147574	-0.0176452	0.155656	0.0364013	-0.12593	-0.00837034	0.378328	0.121534	0.184927	0.220162	0.11813	-0.422185	-0.200923	0.402993	-0.181296	-0.285158	-0.201428	-0.115302	-0.0970698	0.267307	-0.218618	-0.24898	-0.307208	0.118013	-0.0561997	0.0157237	-0.0192198	0.195686	0.0371986	-0.0892713	0.215765	-0.181222	0.0749975	-0.17252	-0.138646	-0.242544	0.124163	-0.398308	0.22512	-0.150842	-0.0130392
chr1_27447308_27497810	-0.0811469	0.0521828	-0.417597	-0.4091	-0.289122	-1.00089	-0.327772	-0.455497	0.118107	-0.155914	-0.27782	-0.281094	-0.324067	-0.334675	-0.523081	-1.28791	0.0622846	-0.623385	-0.55668	-0.765257	0.0542027	-0.261871	-0.677058	-1.03725	-0.482708	-0.172208	-0.169439	-0.485599	0.0291861	-0.0687098	-0.350111	-0.221388	-0.19898	-0.0452112	-0.299064	0.311581	-1.47445	0.0210377	-0.889084	-1.04377	-0.357451	-0.252769	-0.00798991	-0.000619271	0.183539	-0.441696	-0.348545	-0.279564	0.0938119
chr1_27497810_27548787	-0.281324	-0.664416	-0.297494	-0.0502718	-0.265782	0.0288825	-0.182947	-0.0199964	-0.512334	-0.456271	-0.331545	-0.555712	-0.672609	-0.409602	-0.332994	0.404101	-0.667832	0.300652	-0.467593	-0.888641	-0.579225	-0.308444	0.117871	-0.587249	-0.71464	-0.334101	-0.330384	-0.00172056	-0.419193	-0.521639	0.0370468	-0.539743	-0.41809	-0.343882	-0.356329	-0.125641	-0.146724	0.015716	-0.88533	-0.134408	-0.509377	-0.390569	-0.566138	0.034646	-0.54726	-0.222149	-0.166584	-0.262176	-0.368221
chr1_27548787_27599406	-0.380596	-0.343437	-0.757749	0.764165	-0.450347	-0.163361	-0.462573	-0.125932	-0.110484	0.382229	-0.0341151	-0.100084	-0.357565	0.136407	-0.370394	0.704505	-0.320056	-0.381464	-0.150061	-0.00985282	-0.898733	-0.261546	0.0779426	-0.6904	-0.843221	-0.215178	-0.331666	-0.197267	-0.223736	-0.851989	-0.378741	-0.324768	-0.155828	-0.514501	-0.23524	-0.0929449	-0.374744	0.765137	-0.662707	0.0332451	-0.157672	-0.308304	-0.438518	0.640638	-0.0735971	-0.055862	-0.2913	-0.296144	-0.406573
chr1_27599406_27650535	-0.253325	-0.35031	0.20529	0.179687	-0.107261	0.576356	-0.250494	-0.525788	-0.339719	-0.109568	0.381108	-0.284374	-0.0161525	-0.194381	-0.0734866	1.31412	0.3803	0.418756	0.0329919	0.18851	-0.19456	0.26664	-0.159396	-0.583962	-0.447334	-0.304169	-0.413241	0.338209	-0.138011	-0.188101	-0.18631	-0.237893	-0.0757917	-0.00014965	-0.216697	-0.181699	-0.150776	0.492126	-0.227149	0.258811	-0.356091	-0.157144	-0.288641	0.130672	-0.0445238	0.192096	-0.0518517	-0.106831	-0.285556
chr1_27650535_27700813	-0.254445	-0.259667	-0.119106	-0.107879	-0.165322	0.0582174	-0.42079	0.139755	0.0236077	-0.308292	-0.349022	0.111089	-0.348848	-0.00315166	-0.308741	-0.31105	-0.252769	-0.364557	-0.3326	-0.414045	0.255902	-0.410969	-0.556661	-0.660727	-0.21448	-0.127389	-0.436288	-0.362869	-0.34628	-0.431583	-0.114039	-0.240503	-0.074141	-0.0130012	-0.279985	0.308482	-0.618476	-0.284865	-0.0984391	-0.284097	-0.46872	-0.0932045	-0.0147081	-0.308312	0.127117	-0.437387	-0.149307	-0.0146309	-0.118984
chr1_27700813_27751385	-0.0727426	-0.279036	-0.770366	-0.283426	-0.132564	0.194192	-0.0254647	-0.274889	-0.244419	0.290995	-0.00735391	-0.442248	-0.222745	-0.306507	-0.223658	-0.35744	-0.24671	-0.0640004	0.0353423	-0.818105	-0.0941241	-0.0983042	-0.628571	-0.801183	-0.0878049	-0.222792	0.0549272	0.132215	-0.238743	-0.0623187	-0.299239	-0.205359	-0.0727097	-0.216621	-0.290787	0.255417	-0.762821	0.00417511	-0.275554	-0.309234	-0.0778858	-0.134624	-0.158077	-0.101176	-0.0248923	-0.214554	0.0187631	-0.066349	-0.00570087
chr1_27751385_27801982	-0.110451	-0.184569	-0.553196	-0.317273	-0.0778374	-0.109085	-0.174179	-0.274116	-0.182494	-0.3274	-0.278575	-0.355873	-0.329786	-0.555895	-0.564388	0.562409	-0.738748	0.0510844	-0.627911	-0.627718	-0.167026	-1.10807	0.104424	-1.04485	-0.647607	-0.643688	-0.440203	-0.478372	-0.602782	-0.0331316	-0.217931	-0.537269	-0.0878946	-0.525913	-0.560418	-0.236611	-1.13523	0.607961	-0.595351	-0.353358	-0.341573	-0.316839	0.0896848	0.651757	-0.259342	-0.613461	-0.211347	-0.295093	-0.701892
chr1_27801982_27852695	-0.0866532	0.0787774	0.0722849	-0.0407285	0.0207536	-0.216855	-0.245028	-0.270906	-0.304321	-0.375059	0.222846	-0.262061	-0.0966781	-0.184097	-0.011814	-0.177498	-0.18815	0.157171	-0.0820269	-0.59787	0.00248115	0.161177	-0.583806	-0.647927	-0.372174	-0.253668	-0.0691912	0.144247	-0.207461	-0.0828996	-0.000127177	-0.177941	-0.17831	0.0720687	-0.387202	0.332904	-0.716848	-0.591891	-0.204924	-0.535329	-0.313476	-0.440748	-0.152675	0.150483	0.27383	-0.558319	-0.15497	-0.23114	-0.704982
chr1_27852695_27902793	-0.0367508	0.196267	-0.349149	-0.0538384	0.084756	0.576662	-0.0204758	0.850802	-0.0945606	0.621575	-0.429511	-0.0705589	-0.0930982	0.165336	-0.433584	0.509809	-0.209706	-0.348701	0.0681704	0.485831	0.228659	-0.28781	0.287878	-0.796314	-0.18782	-0.00191885	-0.488982	-0.16192	0.0714769	0.3479	0.165838	0.196191	-0.253723	0.134558	-0.064928	0.636029	-0.423014	0.504759	-0.308742	-0.142022	-0.348635	0.158726	0.0748785	-0.483555	0.514652	0.257046	0.0151427	-0.216775	-0.211773
chr1_27902793_27952904	-0.049373	0.0149845	-0.59916	-0.396441	0.192255	-0.0157765	-0.103448	-0.0463535	0.104722	0.05208	-0.837985	-0.0391418	-0.0277756	0.117682	-0.403758	-0.0901649	0.306512	-0.669284	0.0952587	-0.261509	-0.0827386	-0.0624921	-0.183338	-0.560944	-0.0530265	-0.0986242	-0.253581	-0.44795	-0.00143844	0.313823	-0.0445405	0.0570436	0.0353864	-0.210836	-0.180791	-0.0311886	-0.928484	0.0163879	-0.163889	-0.226579	0.0512277	-0.0321809	0.0803734	-0.401193	0.0833699	-0.074751	-0.300961	0.207044	-0.0827182
chr1_27952904_28003450	-0.170936	-0.871046	-0.665125	-0.530123	-0.165768	0.0201309	-0.270236	0.272518	-0.38056	0.0838391	-0.692927	-0.210302	-0.577256	-0.318118	-0.339722	0.280604	-0.252524	-0.618434	-0.243278	-0.38297	0.30754	-0.234026	0.0357972	-0.801123	-0.529813	-0.327317	-0.714679	-0.675241	-0.440325	-0.300255	0.011415	-0.164542	-0.305778	-0.167465	-0.392939	0.120997	-0.937935	0.212853	-0.579424	-0.609309	-0.634027	-0.194705	-0.384144	-0.459548	-0.0736463	-0.176532	-0.466195	-0.304761	-0.434969
chr1_28003450_28053928	-0.236493	-0.128761	0.173631	0.480499	-0.285386	-0.0598685	-0.272942	-0.0252606	-0.283962	0.490229	0.182646	-0.319005	-0.392672	0.100417	-0.479508	0.511817	-0.0832492	-0.281721	-0.44532	-0.17368	-0.210515	0.0556876	0.160492	-0.717944	-0.632982	-0.10287	0.225195	-0.173788	-0.340024	-0.0295963	-0.0600885	-0.136513	-0.330871	-0.354195	-0.381367	-0.0460868	-0.711607	1.18897	-0.630676	-0.0766808	-0.0842525	-0.276287	-0.538579	0.550978	-0.179303	-0.175527	-0.6843	-0.227425	-0.615916
chr1_28053928_28104283	-0.0381903	-0.37739	0.61641	0.0502821	-0.112633	-0.0117485	-0.261901	-0.0431183	-0.214253	0.0936193	0.0346793	-0.107163	-0.399104	-0.189968	-0.109291	0.663829	-0.153332	0.119346	-0.165174	-0.659665	0.260058	-0.310924	0.110611	-0.70122	-0.912981	-0.276141	-0.350472	-0.572369	0.10734	-0.554825	-0.152745	-0.165456	0.0477644	-0.0413665	-0.349656	0.0307507	-0.506949	0.570833	-0.213909	-0.23598	-0.127529	-0.24436	-0.268781	0.51085	0.0750096	-0.102073	0.0477308	-0.122713	0.249537
chr1_28104283_28155231	-0.376159	-0.589834	-0.760358	0.436164	-0.402872	-0.183866	-0.722721	0.0235326	-0.546214	-0.107923	-0.585321	-0.0130435	-0.640567	-0.221755	-0.393744	0.241309	-0.20119	-0.431934	-0.30286	-1.04348	-0.196239	-0.255044	-0.0241146	-0.896868	-0.79969	-0.379696	-0.122507	-0.771774	-0.569781	-0.652811	0.418713	-0.261825	-0.466326	-0.23269	-0.272796	-0.655356	-0.893277	0.472638	-0.480438	-0.527992	0.0338376	-0.41074	-0.270775	-0.0266423	-0.21258	-0.307543	-0.274225	-0.102572	-0.352293
chr1_28155231_28207474	-0.26293	-0.319916	-0.459456	-0.217844	-0.252844	0.334217	-0.286062	0.0559846	-0.0526238	-0.17115	-0.102973	-0.51387	-0.121161	-0.424727	-0.305856	-0.242863	-0.342271	-0.129904	-0.204322	-0.686762	-0.651525	-0.135037	-0.130448	-1.11127	-0.338862	-0.10129	-0.156166	-1.00761	-0.291859	-0.445352	-0.0977477	-0.216662	-0.647501	-0.172031	-0.357434	-0.0177685	-1.05098	0.27306	-0.248617	-0.516204	-0.288191	-0.188099	-0.173218	-0.00682798	-0.198912	-0.120619	-0.175104	0.0177023	-0.0424798
chr1_28207474_28258423	-0.194678	-0.61836	-0.579808	-0.155357	-0.797672	-0.991289	-0.661272	0.0668431	-0.430798	-0.209521	0.0475674	-0.449993	-0.559765	-0.403319	-0.306318	0.162319	-0.438397	-0.371922	-0.408833	-0.784144	-1.32397	-0.52627	-0.277043	-1.17007	-0.550301	-0.545319	-0.519457	-0.0103116	-0.502815	-0.364602	-0.165729	-0.291532	-0.266873	-0.517813	-0.310388	-0.11129	-0.598686	-0.151242	-0.65198	-0.410482	-0.121535	-0.312183	-0.584099	-0.928916	-0.394092	-0.511033	-0.779289	-0.427131	-0.50756
chr1_28258423_28308713	-0.228255	-0.326128	-0.445869	0.475512	-0.290328	0.380086	-0.291015	-0.456295	-0.241714	0.186051	-0.060155	-0.0853274	-0.314197	-0.617058	-0.186282	0.293837	-0.437081	0.097051	0.283049	-0.269254	-0.149413	0.0220692	-0.244834	-0.560039	-0.335348	-0.420791	-0.193433	-0.338673	-0.235533	-0.371109	0.0312203	-0.16454	-0.0798698	-0.148912	-0.276091	0.062134	-0.261822	0.359998	-0.16507	0.312896	-0.0974112	-0.127895	-0.40132	-0.112121	-0.166505	-0.175518	-0.234114	-0.0683016	-0.363516
chr1_28308713_28358897	-0.215544	-0.537793	-0.0672043	-0.0268875	-0.0128306	-0.265914	-0.480787	-0.5034	-0.269109	-0.098774	-0.293222	-0.272237	-0.440114	-0.183426	-0.260625	0.0456405	-0.314023	-0.415077	-0.510077	-1.33824	-0.637067	-1.24201	-0.525879	-0.804543	-0.429201	-0.305417	-0.27295	-0.57445	-0.465969	-0.135103	-0.047947	-0.374131	-0.127633	-0.220486	-0.433326	-0.205873	-1.07992	0.0393683	-0.298264	-0.512682	-0.353299	-0.404289	-0.0860986	0.064769	-0.142179	-0.597656	-0.211318	-0.165098	-0.382206
chr1_28358897_28409220	-0.368526	-0.0387413	-0.685014	0.229019	-0.674247	-0.102781	-0.374685	-0.853937	-0.346382	-0.708573	-0.29857	-0.748928	-0.593257	-0.579821	-0.166162	0.248553	-0.033346	-0.788301	-0.362156	-1.2682	-0.0445049	-0.684251	-0.218648	-0.611456	-0.84913	-0.108855	-0.0304297	-0.000171285	-0.678874	-0.85762	-0.40514	-0.216788	-0.601991	-0.354889	-0.636975	-0.270811	-1.54386	0.619764	-1.08858	-0.814992	-0.38782	-0.415816	-0.123862	0.0865669	-0.48036	-0.274413	-0.270984	-0.0266307	-0.827043
chr1_28409220_28460267	-0.234652	-0.0922354	-0.23957	-0.122388	0.0542346	-0.0484868	-0.151721	-0.447011	-0.17122	-0.441772	-0.131413	-0.214555	-0.254998	-0.205205	0.0992802	0.451641	-0.418719	-0.254231	-0.0839357	-0.981562	-0.00911152	0.224038	-0.32074	-1.54408	-0.584739	-0.235005	-0.168629	-0.0155512	-0.194563	-0.290394	-0.285664	-0.151782	-0.358405	-0.130586	-0.188916	-0.0381124	-0.747037	0.0298159	-0.771912	-0.709931	-0.612827	-0.283603	-0.362558	-0.348821	0.116948	-0.559003	-0.144442	-0.253173	-0.0589144
chr1_28460267_28510648	-0.0505689	-0.266145	-1.19778	-0.660242	-0.126372	-0.261789	0.0490858	-0.601997	0.0165078	-0.672554	-0.724508	-0.0862566	-0.325915	-0.198556	-0.222337	-0.159935	-0.564761	-0.352449	-0.238732	-0.604674	0.192295	-0.714172	-0.299084	-0.756081	-0.703913	-0.176233	-0.713002	-0.357265	-0.160798	-0.0556208	0.354665	-0.240701	0.281139	0.139849	-0.370474	0.0341334	-1.30045	-0.0295158	-0.253564	-0.284614	0.0528451	-0.171583	-0.130694	0.349817	0.0916084	-0.148047	-0.3883	-0.322971	-0.130867
chr1_28510648_28560873	-0.314243	-0.30434	-0.554439	-0.204036	-0.387036	-0.157441	-0.480659	-0.373662	-0.421664	-0.174502	-0.39733	-0.468355	-0.636594	-0.8206	-0.478517	0.101781	-0.955517	-0.178505	-0.144054	-0.37735	-0.66297	-0.506599	0.0016979	-1.31714	-0.855685	-0.307491	-0.904886	0.0221989	-0.737981	-0.22634	-0.587556	-0.590205	-0.358351	-0.628289	-0.560629	-0.213106	-1.16542	0.463115	-0.102969	-0.725635	-0.713078	-0.51156	-0.591567	-0.265818	-0.303772	-0.74514	-0.584583	-0.328249	-0.48635
chr1_28560873_28611401	-0.284407	-0.0037327	0.154996	0.591938	-0.0280917	0.225376	-0.198623	-0.690533	-0.0957071	0.381261	-0.23027	-0.303126	-0.377867	0.102728	-0.00293915	1.21971	-0.0674466	0.364013	-0.260968	-0.0943224	-0.374319	0.264682	0.268787	-0.506143	-0.452867	-0.347291	-0.129753	0.0334126	-0.373565	-0.415084	-0.166729	-0.11831	-0.404749	-0.214676	-0.262259	0.265661	0.526402	0.557176	-0.169211	0.407557	0.0943594	-0.41942	-0.200744	-0.768614	0.23258	-0.17249	-0.0157038	-0.273131	-0.242254
chr1_28611401_28662108	-0.0583903	-0.723212	-1.26322	-0.617247	-0.582256	-0.657629	-0.597841	0.216101	-0.252088	0.348395	-1.10758	-0.201789	-0.58528	-0.607861	-0.271208	-0.156082	-0.543392	-0.231939	-0.234143	-0.258106	-0.812277	-0.743241	-0.414901	-0.914115	-0.778477	-0.29949	-0.490017	0.33313	-0.312349	-0.166787	-0.0950904	-0.300544	-0.359093	-0.486775	-0.349376	0.0791188	-0.677709	0.149408	-0.285527	-0.661511	-0.71649	-0.372492	-0.308462	0.37604	0.24971	-0.0738224	-0.228929	0.000158989	-0.375869
chr1_28662108_28713067	-0.418274	-0.363293	-1.27213	-0.131199	-0.175623	0.261684	-0.285068	0.0764186	-0.387283	-0.260912	-0.157388	-0.45665	-0.666265	-0.409863	-0.0400518	0.300652	-0.00139709	-0.240242	-0.123175	-0.667224	-0.580289	-1.29909	0.128491	-1.26355	-1.14604	-0.453539	-0.758311	-0.214906	-0.112897	-0.905751	-0.213013	-0.407525	-0.565821	-0.256003	-0.440563	-0.0413731	-0.575901	0.088019	-0.545305	-0.94271	-0.590897	-0.4274	-0.401562	0.262732	-0.277022	-0.535665	-0.135547	-0.117462	-0.456209
chr1_28713067_28763551	-0.113337	-0.630663	-0.343898	-0.264407	-0.285151	-0.290103	-0.264119	0.0286565	-0.250412	-0.53866	-0.560296	-0.494828	-0.386359	-0.477113	-0.173962	-0.138143	-1.19474	-0.617983	-0.388403	-0.286057	-0.443592	-0.37003	-0.54143	-0.16725	-0.912082	-0.317033	-0.552002	-0.630713	-0.158652	-0.568052	-0.24703	-0.27638	-0.310688	-0.351147	-0.149618	0.0160725	-0.457776	-0.00746529	-0.102367	-0.596522	-0.625826	-0.38519	-0.316904	-0.371628	-0.338458	-0.521644	-0.327849	-0.0253352	-0.308418
chr1_28763551_28814056	-0.364768	-0.0415446	-1.22677	0.305605	-0.224216	-0.910869	-0.493944	-0.47541	-0.376966	-0.615528	-0.592905	-0.170109	-0.400657	-0.174542	-0.35881	0.175676	-0.306906	-0.752033	-0.294223	-0.500368	-0.222939	-0.211174	-0.0316164	-0.544934	-0.874276	-0.435884	-0.357664	-0.926894	-0.0691684	-0.901025	-0.975607	-0.272007	-0.59236	-0.215256	-0.0598869	-0.237231	-0.413018	0.28821	-0.812298	-0.99938	-0.683634	-0.271821	-0.0385629	0.219337	-0.112265	-0.241087	-0.186011	-0.126451	-0.654239
chr1_28814056_28864895	-0.144378	0.0172064	-0.850842	0.553073	-0.335839	0.757514	-0.270703	0.267205	-0.47262	0.434839	-0.517167	-0.186679	-0.479131	-0.0533661	-0.265222	1.29397	-0.195909	-0.830837	-0.0428252	0.784927	-0.313264	-0.182758	0.61728	-0.0472952	-0.813868	-0.194574	-0.135808	-0.78316	0.0582569	-0.321103	-0.223946	-0.14077	-0.278387	-0.155407	0.215955	0.277561	0.656284	0.695411	-0.340106	-0.0709379	-0.271287	-0.207584	-0.262159	0.654999	0.0554701	-0.0346507	-0.30992	-0.405721	-0.309256
chr1_28864895_28915922	-0.605642	-0.655543	-0.631784	0.0922455	-0.594006	0.448479	-0.562727	0.0541085	-0.519873	-0.17441	-0.582685	-0.5819	-0.575554	-0.113471	-0.524145	1.06921	-0.568504	-0.878309	-0.71889	0.182641	-0.645863	-0.564325	-0.258439	-0.345058	-0.966691	-0.333085	-0.190892	-0.315045	-0.747188	-0.777072	-0.311913	-0.357062	-0.687895	-0.502321	-0.156062	-0.441085	0.24185	1.00851	-0.645928	-0.255456	-0.729021	-0.580074	-0.652523	-0.370459	-0.222401	-0.124075	-0.622645	-0.230398	-0.631153
chr1_28915922_28966780	-0.606417	-0.465254	-1.51883	-0.458556	-0.349305	0.198602	-0.290308	-0.593952	-0.52121	-0.494177	-1.11094	-0.51386	-0.679359	-0.7498	-0.578161	0.0578831	-0.433093	-1.0901	-0.352441	0.182827	-0.041925	-0.782608	-0.415092	-0.734696	-1.21362	-0.625424	-1.02573	-1.45356	-0.454217	-0.996736	-0.342269	-0.495431	-0.377044	-0.354191	-0.227645	-0.281962	-0.216083	0.179117	-0.398392	-0.866809	-0.824912	-0.456797	-0.461822	-0.195117	-0.440836	-0.542617	-0.427547	-0.44641	-0.449004
chr1_28966780_29017639	-0.69161	-0.656245	-0.520752	0.181796	-0.738885	0.0949734	-0.736956	0.146668	-0.778472	0.0828238	-0.66529	-0.87157	-0.898725	-0.264749	-0.619939	0.769445	-0.259532	-0.882057	-0.437362	0.249956	-0.501768	-0.838922	-0.172329	-0.327201	-1.41802	-0.795946	-0.683716	-0.433983	-0.716592	-0.472836	-0.0404597	-0.472343	-0.75558	-0.580948	-0.0623482	-0.753284	0.507889	0.769105	-0.816203	0.176035	-0.611595	-0.745291	-0.599577	-1.13337	-0.963887	-0.408316	-0.623472	-0.427931	-0.861213
chr1_29017639_29068571	-0.41511	-0.124287	-0.269774	0.290477	-0.303042	0.187006	-0.334209	-0.738781	-0.316735	0.349058	0.137631	-0.686685	-0.272389	-0.281067	-0.431896	1.15241	-0.221424	-0.392238	-0.767129	0.464046	-0.376475	-0.447176	0.0143255	-0.0584665	-0.834925	-0.251716	-0.167016	-0.271699	-0.241487	-0.255476	-0.402064	-0.155035	-0.155777	-0.135959	0.233604	-0.408767	0.247261	0.753646	-0.64003	0.339014	-0.761434	-0.440203	-0.447812	-0.469084	-0.410864	-0.225248	-0.304884	-0.490071	-0.26576
chr1_29068571_29119215	-0.305888	-0.186665	0.0698803	0.241316	-0.0183382	-0.643568	-0.185167	-0.0765689	-0.241553	-0.000399238	-0.126991	-0.349012	-0.306473	-0.0704225	0.0359194	0.63609	-0.604712	0.321671	-0.233742	0.125328	0.218547	0.235394	0.337013	-0.070148	-0.781765	-0.21319	0.248405	0.0144739	-0.498037	-0.0825574	0.191073	-0.306444	0.0285792	0.0302554	0.0696089	0.225866	0.381824	0.159758	-0.413097	0.302226	0.161838	-0.306431	-0.276087	-0.652809	-0.0284782	-0.54947	-0.269632	-0.600275	-0.0317024
chr1_29119215_29169487	-0.0986855	-0.0288055	-1.02044	0.0381124	0.121074	0.0871231	-0.00712047	0.362687	-0.11631	0.245243	-0.716278	-0.203475	-0.905183	0.081247	-0.274315	0.927394	-0.558537	-0.640718	-0.160304	0.31535	-0.200108	-0.28824	-0.158908	0.117857	-0.408355	0.00516132	-0.483831	-0.422211	-0.0392761	-0.0392308	-0.173703	-0.0600939	-0.217256	-0.0628316	0.246576	-0.0886663	-0.0442443	0.8852	-0.441864	-0.748856	-0.733046	-0.178009	0.092142	0.291267	-0.252174	-0.160831	-0.198524	0.0299447	-0.549656
chr1_29169487_29220079	-0.0496816	-0.0613942	-0.120758	0.138693	-0.149144	0.476244	-0.0357528	0.535839	-0.137886	0.70866	-0.394166	-0.172253	-0.214192	0.0749641	0.0218078	0.626702	-0.129079	-0.242262	0.092108	0.788752	0.0526181	-0.484568	0.244584	0.0983757	-0.791544	0.122883	0.0524773	-0.30032	0.262654	0.0402553	0.327405	-0.0389138	-0.304447	-0.0230497	0.365767	0.0523407	0.46201	1.00971	-0.410999	-0.117509	-0.411074	-0.00102934	0.148316	0.0974302	-0.140857	0.0370087	-0.684428	-0.0498163	-0.619598
chr1_29220079_29270314	-0.320857	-0.264049	-0.523035	-0.15366	-0.125142	-1.14035	-0.526825	-0.446576	-0.476298	-0.366189	-0.312449	-0.428689	-0.316591	-0.343049	-0.470817	-0.279891	-0.21088	-0.513178	-0.257606	-0.110606	-0.666785	-0.545176	-0.166717	-0.261232	-0.487937	-0.143931	-0.463195	-0.446343	-0.438786	-0.725263	-0.834977	-0.331376	-0.225436	-0.318277	-0.13985	-0.237593	-0.215757	0.0319852	-0.125978	-0.640333	-0.0713207	-0.366084	-0.457449	-0.347843	-0.202943	-0.654267	-0.45899	-0.590056	-0.857139
chr1_29270314_29320874	-0.0235162	-0.080155	-0.259386	0.27141	-0.26199	-0.686323	-0.0804499	0.447538	-0.15956	0.399951	-0.177377	0.0132727	-0.247409	-0.452674	-0.139049	0.639264	-0.0588448	0.11502	-0.252774	0.231073	-0.0570242	0.0162772	-0.202524	-0.187895	-0.550819	-0.0633754	-0.584774	0.219811	-0.277304	-0.200842	-0.126687	0.0372455	0.0339574	-0.215196	0.41065	0.0893063	0.0484046	0.422737	-0.673069	-0.604374	-0.646355	-0.193845	-0.211229	0.0495982	-0.0231829	-0.040646	0.00896747	0.20775	-0.228783
chr1_29320874_29371218	-0.405544	-0.343882	-0.386581	-0.529374	-0.144118	-0.974674	-0.2689	0.114418	-0.435881	-0.371215	-0.720415	-0.347762	0.0260597	-0.125552	-0.181735	0.558275	-0.551308	-0.201139	-0.438605	-0.232644	-0.556223	-0.066621	-0.181792	0.159308	-0.611123	-0.112848	-0.319656	-0.0708979	-0.375847	-0.339819	0.119093	-0.281859	-0.792733	-0.302031	0.135959	-0.523425	-0.182283	0.470488	-0.13761	-0.455657	0.362019	-0.47042	-0.481313	0.518273	-0.392325	-0.309268	-0.056061	-0.202483	0.0634624
chr1_29371218_29421859	-0.450836	-0.63933	-0.3932	0.342438	-0.390475	0.0124884	-0.476623	0.114178	-0.525248	-0.468593	-0.728866	-0.121635	-0.340354	-0.203355	-0.344149	0.11613	-0.138475	-0.357746	-0.144905	-0.105209	-0.219312	-0.310931	-0.12618	-0.211594	-0.851169	-0.63995	-0.422053	-0.379396	-0.529861	-0.412734	0.337886	-0.121825	-0.155854	-0.271253	-0.0225946	-0.348369	0.154997	0.278061	-0.536211	0.0936142	-0.396818	-0.376026	-0.543391	0.0174064	-0.331281	-0.593491	-0.707732	-0.16907	-0.310034
chr1_29421859_29472682	-0.350466	0.0300813	-0.802292	0.626653	-0.442386	0.73451	-0.461381	0.0987743	-0.601182	0.89344	-0.967684	-0.341345	-0.543844	-0.00237574	-0.350794	1.12159	0.0202991	-0.619747	-0.223864	0.590798	-0.37734	-0.334384	0.279827	-0.390049	-0.908418	-0.0622493	-0.274311	-0.247103	-0.414287	-0.554849	0.399441	-0.356713	-0.327314	-0.798344	0.140634	-0.386151	0.758061	1.19659	-0.764046	0.275877	-0.62296	-0.28523	-0.405644	-0.221497	-0.449461	0.0625205	-0.24292	-0.532502	-0.429083
chr1_29472682_29523188	-0.0192145	-0.105512	0.333631	0.0722887	-0.227562	-0.162396	0.150354	-0.368635	-0.221339	-0.455262	0.0164759	-0.226068	-0.0948459	0.124377	-0.194209	-0.040021	-0.0409104	0.237743	0.238052	0.203842	0.00225171	0.193593	-0.505338	-0.255349	-0.281851	-0.147225	-0.443901	0.504863	-0.445051	0.0246308	0.138593	-0.0846455	-0.154115	-0.0414763	0.322468	0.225921	-0.434211	0.132748	-0.248611	-0.487059	-0.062247	-0.162569	-0.19168	0.49991	0.408933	-0.0290086	-0.0973656	-0.0160768	-0.00177884
chr1_29523188_29573345	-0.0435354	-0.174462	-0.617172	0.721086	-0.166832	0.879045	0.0770238	0.907308	-0.0186424	1.10734	-0.389752	-0.153662	-0.208377	0.265873	0.115476	1.65841	0.589873	-0.193226	-0.065035	1.26539	0.26899	0.204747	0.696853	0.213947	-0.276238	-0.0505377	-0.252162	-0.223698	0.0681819	0.0327605	0.570453	0.0756227	-0.288375	-0.00988452	0.480442	-0.0891833	0.64622	1.20336	-0.337745	0.668217	0.0376557	0.0957567	-0.291219	0.237435	0.228426	0.229316	-0.178246	0.193217	-0.300619
chr1_29573345_29623414	-0.0607672	-0.34237	0.494821	0.348858	0.148533	-0.0899566	0.168834	0.150995	0.011787	0.224007	0.168582	0.143808	0.0319862	0.0786873	-0.063983	0.861059	-0.244357	0.126122	-0.110596	0.454538	0.144322	-0.0496699	-0.0434396	0.206388	-0.0335299	-0.153355	0.0151697	0.260783	-0.0824073	-0.258224	-0.295284	-0.126345	0.400259	-0.0565382	0.428098	-0.139354	0.590272	0.11428	-0.198117	0.383949	-0.222477	-0.0380092	0.380816	0.174815	-0.124675	0.0835696	-0.124173	-0.220349	-0.241261
chr1_29623414_29673826	-0.0184768	0.0288359	0.650997	-0.0593875	0.189278	-0.259584	-0.0333866	-0.688697	0.246072	-0.537992	0.0452324	0.0968641	0.250055	-0.0282029	0.226571	-1.60444	0.0129358	0.0909107	-0.048526	0.200301	0.0983041	0.657078	-0.488766	0.399871	0.311135	0.0523485	0.465856	0.44175	0.181761	0.401818	0.195341	0.113998	-0.0921683	0.0564607	0.637318	-0.438058	0.0951548	-0.443048	-0.182828	-0.195776	0.261165	0.0700976	0.280267	-0.650921	0.00939036	-0.263597	0.269607	-0.0394334	-0.110566
chr1_29673826_29724245	0.164477	-0.0600798	0.224091	-0.403887	0.17406	-0.0420427	0.0548366	0.00385609	0.205133	0.0250524	-0.24311	0.270543	-0.0731823	-0.0918314	-0.0342589	-0.758727	0.0403637	-0.0301892	0.208098	-0.0659024	0.00219676	-0.128198	-0.763743	0.379361	0.307429	-0.344848	-0.0162894	-0.186862	0.272754	0.483143	-0.100521	0.338412	-0.0521613	-0.0226375	0.560237	-0.130272	-1.09554	-0.246488	0.0484764	-0.249124	0.0180092	0.11129	0.393316	-0.495047	-0.0449069	0.092118	0.00636491	0.310767	0.292523
chr1_29724245_29775883	-0.19411	-0.101259	-2.40451	0.1082	-0.0114245	-0.327019	-0.149296	0.105434	-0.0253661	-0.571657	-1.10374	-0.406513	0.280048	-0.192394	-0.244763	-0.518382	0.111617	-0.0218158	0.0884345	-0.00783447	0.0401518	-0.103023	-0.664764	0.221622	0.031119	-0.298675	-0.0494576	-0.505239	0.153804	-0.0483483	-0.258136	0.0377465	0.0676855	-0.145774	0.339917	-0.0636427	-0.194465	-0.36011	-0.158855	-0.189913	-0.0920962	-0.0341682	0.0659069	-0.426824	-0.0820696	-0.273689	0.0262973	-0.0521784	0.105249
chr1_29775883_29825933	0.0689495	0.123335	-0.148564	-0.417505	0.107265	-0.159573	-0.0365212	0.323248	-0.000750417	-0.389322	0.27034	0.173054	-0.0117558	-0.275973	-0.155061	-0.550917	-0.406318	-0.299307	-0.0168778	-0.109453	0.420689	-0.153038	-0.650876	0.299647	0.288824	-0.268367	0.00239304	0.133288	0.103409	0.0570573	-0.0739996	0.0258406	-0.00466029	-0.14134	0.572572	-0.498411	-0.010451	-1.05895	0.256425	-0.288575	0.228554	0.163565	0.185251	0.438045	0.276006	-0.160533	0.119133	0.0547441	0.0480551
chr1_29825933_29876000	0.0570118	0.360702	0.0723725	-0.804933	0.470905	-0.397467	0.0113748	-0.0542714	0.192942	-0.315166	-0.1951	0.174519	0.276458	0.0366581	-0.237884	-0.877606	0.401618	0.043877	0.188754	0.17109	-0.809995	-0.56353	-0.705361	0.201869	0.0899229	0.0359672	-0.519758	-0.204383	0.193634	0.313382	-0.281801	0.314991	0.195771	-0.0313185	0.419185	-0.224932	-0.817902	-0.446223	-0.241088	-0.324432	0.26194	0.143002	0.20802	-0.151403	-0.000912758	-0.187008	0.13452	0.155224	0.307979
chr1_29876000_30076192	-0.113856	-0.0184772	0.0133889	-0.587094	-0.219206	0.0330063	-0.0882152	-0.0961137	0.0159608	-0.300545	0.0513893	0.0253494	-0.00984829	-0.140315	-0.098123	-0.790586	-0.534209	0.0692033	0.268855	0.223103	0.264596	0.124239	-0.505355	0.256413	-0.0280468	0.303759	0.243689	-0.0263337	-0.0331623	0.106164	0.0352755	0.162088	-0.185747	-0.429223	0.357138	-0.283481	-0.260031	-0.826831	0.0844339	-0.497224	0.0300707	0.102471	0.152984	0.40481	-0.262192	0.100793	0.234702	0.244545	-0.054086
chr1_30076192_30126398	0.0799777	0.443261	-0.126759	-0.459251	0.324017	0.237748	-0.0926043	0.0119051	-0.136811	-0.318596	-0.023627	0.144786	0.258118	-0.0573681	-0.0131238	-1.03474	0.340986	0.263718	0.286011	-0.168094	-0.392843	-0.119706	-0.450258	0.246454	0.262656	0.199071	0.0426052	-0.157132	0.330116	0.140084	0.266917	-0.00443258	0.318613	0.0892194	0.370813	-0.0856645	-0.206733	0.0149098	-0.205786	-0.115472	0.00415202	0.0617238	0.0633488	-0.0804838	-0.398626	0.0273704	-0.0651789	0.0827098	0.133305
chr1_30126398_30176889	-0.0236425	-0.0467043	-0.0636833	-0.631114	0.271009	0.189746	0.0379053	-0.451181	0.0154522	-0.0464162	-0.0722939	-0.10636	-0.0189507	0.0636414	0.0440555	-1.07071	-0.0661753	0.0193834	0.163101	0.159425	0.233268	0.166697	-0.533907	0.436461	0.553333	0.232303	-0.0986486	0.372021	0.0402128	0.18819	0.515415	-0.0283443	-0.277988	0.0897136	0.533132	-0.129034	-0.127573	-0.688925	-0.703598	-0.168934	0.11703	0.169633	0.120272	0.0105901	-0.553439	-0.0151514	0.037914	0.271002	-0.0322451
chr1_30176889_30227114	-0.0443995	0.180692	-0.551381	-0.678208	0.0943733	-0.4307	-0.0633264	-0.213402	0.133902	-0.645615	-0.213914	0.194817	0.107806	-0.0836288	-0.220608	-0.9776	-0.108579	-0.363395	0.0290338	-0.235595	-0.257399	-0.264471	-0.732795	0.375473	0.106148	0.0133888	0.00870032	-0.259989	0.0507345	0.0826964	0.316774	0.0239574	0.193275	-0.0139851	0.213045	0.0687324	-0.858674	-0.805216	-0.132528	-0.652465	-0.459483	0.110024	0.147981	-0.304123	-0.103203	-0.289493	-0.154578	-0.0315935	-0.127366
chr1_30227114_30277384	-0.076404	0.112391	0.895404	-0.460623	-0.0402618	-0.272853	-0.296682	-0.178596	-0.281409	-0.249551	0.665203	-0.134252	-0.112977	-0.203141	-0.00612951	-0.517161	0.00338122	0.119767	0.0286655	-0.0899504	-0.722481	0.102253	-0.574355	0.149702	0.179361	-0.109165	0.0409515	0.772114	0.0219601	0.0785167	0.0757099	0.0454411	0.058032	-0.110501	0.204586	-0.213786	0.228974	0.0172775	-0.0566406	0.0147973	-0.30336	-0.157666	-0.153724	-0.455819	-0.280676	-0.257481	-0.166135	0.141857	-0.00198914
chr1_30277384_30327386	0.0109025	0.0900021	0.223817	-0.14295	0.121202	-0.221513	0.0109722	-0.203803	-0.0255316	-0.228938	0.128323	-0.0821023	0.0850067	0.125182	0.0398154	-1.10502	0.217696	-0.175726	-0.175762	0.181066	-0.212525	-0.0306077	-0.730949	0.166121	0.401993	-0.0060337	0.0770232	0.487948	0.186796	0.41093	0.109313	0.0436136	0.234702	0.0774451	0.464859	0.217191	-0.4963	-0.518266	-0.470136	-0.194316	-0.013207	0.148832	0.0983733	-0.106876	-0.196859	-0.109733	-0.0150902	0.104069	0.103934
chr1_30327386_30377489	-0.0331646	0.132663	-0.586767	-1.00604	-0.225201	0.0243707	0.139044	0.0108926	0.183063	0.165664	-0.603727	0.26521	-0.15556	0.1452	-0.195712	-1.97353	0.579543	-0.481602	0.310098	0.0634586	-0.0373911	-0.445096	-0.657311	-0.0263416	0.34872	0.163423	-0.2516	-0.722895	0.0193322	0.206919	0.508277	0.0731622	0.269388	0.075382	0.374818	-0.163953	-0.304741	-0.109765	0.0570587	-0.432986	-0.0370624	0.18743	0.179935	-0.0597893	-0.143029	-0.117868	-0.0494063	0.0300484	-0.0947762
chr1_30377489_30427551	0.123979	-0.000315399	-0.812907	-0.108481	0.26661	-0.116489	0.0658499	0.0473689	0.230095	0.221119	-0.625724	0.525821	0.0883521	0.171566	-0.213342	-0.421514	0.0576361	-0.799186	0.0550792	0.000596656	0.308003	-0.0862007	-0.365797	0.170892	0.144338	0.208854	-0.239178	-0.387272	0.249246	0.472462	0.00849058	0.0562459	0.382603	0.0459133	0.615059	-0.127022	-0.470391	-0.580713	0.0540647	-0.198453	0.0411022	0.271679	0.302897	-0.0258326	0.0467759	-0.0167975	-0.188525	0.212594	0.2768
chr1_30427551_30478723	-0.0446556	0.130401	0.783572	-0.300508	0.0724733	-0.31877	-0.0176407	-0.0429606	0.0977882	-0.115499	0.411563	0.188683	0.26605	0.0531909	0.102469	-0.652112	0.123137	0.32069	0.101403	0.270056	-0.164478	0.151046	-0.643921	0.174473	0.501972	-0.0883713	0.143506	0.221461	0.395619	-0.176359	0.0757547	0.178967	-0.232385	-0.0636067	0.336845	-0.10736	0.245104	-0.00756448	-0.0995547	-0.275544	0.162628	0.29236	0.022014	0.170138	0.0188656	-0.176519	-0.186614	-0.00953157	-0.0164065
chr1_30478723_30528791	0.019073	0.0957064	0.390084	0.2094	-0.219966	-0.465846	0.181308	0.111203	-0.000439213	0.0360258	0.602063	0.0924787	0.252982	-0.0522895	0.250322	-1.0586	0.300303	0.504941	0.279855	0.126519	0.189952	0.176879	-0.273914	0.473869	0.510467	0.0132079	0.0639215	0.197595	-0.0333479	0.253506	0.258171	0.395673	-0.0674089	0.132853	0.531471	-0.00394493	0.441034	-0.554507	-0.0194985	-0.315594	0.378407	0.166989	0.274102	0.013403	0.216586	-0.125187	-0.0206908	-0.0700126	0.276497
chr1_30528791_30578816	0.114767	0.0283532	0.311967	-0.275494	0.240813	-0.798707	0.171982	-0.0524468	0.105535	-0.390411	0.142237	0.157107	0.436332	0.00626839	0.0979285	-1.26776	0.28603	0.0236406	0.166906	0.168156	0.455513	-0.255439	-0.770318	0.201951	0.490225	0.309241	-0.315536	0.399773	0.442044	0.229598	0.116863	0.172306	0.317363	0.133913	0.384742	-0.135881	-0.931347	-0.798117	-0.0355947	-0.723738	0.112083	0.333331	0.178784	0.140143	-0.0895593	-0.0343892	0.0913345	0.297124	0.0213106
chr1_30578816_30629162	0.0794279	-0.0352655	-1.00198	-0.36735	0.0352976	-0.127208	-0.113802	0.144877	0.219771	-0.175007	-0.927326	0.16668	-0.330671	-0.21651	-0.156856	-0.827757	0.112931	-1.21303	0.107625	-0.0246887	-0.2039	-0.300436	-0.345202	-0.159825	0.0674853	0.000650037	-0.447615	-0.456311	0.195568	0.258471	0.130329	0.127343	0.358828	0.214031	0.299188	-0.0982271	-0.729288	-0.0390904	-0.160233	-0.826473	0.0210573	0.147853	0.285565	-0.0356169	-0.249819	-0.056835	-0.157244	-0.0361867	-0.541255
chr1_30629162_30679218	-0.244702	0.0546187	0.270662	-0.607129	0.11906	-0.0583078	-0.36634	-0.440674	-0.0591006	-0.113112	-0.680782	-0.0336571	-0.391518	-0.227307	-0.140679	-0.482009	0.121225	-0.81201	-0.00785424	-0.0609669	-0.326489	0.206466	-0.836797	0.123115	0.29401	-0.124088	-0.0512576	0.137538	0.10615	-0.00403478	-0.849906	-0.00526141	-0.386356	-0.16082	0.411865	-0.341834	-0.305924	-0.951054	-0.0127949	-0.417832	0.165176	-0.020449	0.203912	-0.544941	-0.22054	-0.278056	-0.432626	-0.293489	-0.367775
chr1_30679218_30729305	-0.212075	-0.0830459	0.341314	-0.884604	-0.127753	-0.12659	-0.247502	0.155021	-0.321725	-0.334237	-0.749845	-0.269932	-0.00151639	-0.168422	-0.178757	-0.705439	-0.223495	-0.69327	-0.371807	-0.233253	0.337856	0.0257145	-0.29375	-0.0474285	-0.217998	0.0267818	-0.587217	-0.213603	0.0812004	0.188506	-0.601316	-0.231649	-0.0814456	-0.358992	-0.0172231	-0.336832	-0.217918	-0.61278	-0.211868	-0.588378	0.24066	-0.0543555	-0.386839	-0.730868	-0.523611	-0.208642	-0.600682	-0.204777	-0.638604
chr1_30729305_30779321	-0.102478	0.157954	0.370267	0.0312411	0.0379823	0.464437	0.160869	0.325305	-0.0922017	-0.435444	0.112472	0.0289474	0.0986711	-0.0424053	0.152535	-0.380723	-0.151131	0.19095	-0.00693105	0.228856	-0.371701	-0.178478	-0.534101	0.245282	0.249544	-0.00875836	0.100276	0.33499	0.128672	-0.0233196	-0.121402	0.132391	0.290065	0.048394	0.462239	-0.0349747	-0.265418	-0.367331	0.0986586	-0.510094	0.116854	0.0928838	-0.263059	-0.540389	-0.142695	-0.0517512	0.057692	0.0079691	-0.0323617
chr1_30779321_30830229	-0.0790841	0.07315	0.187248	-0.176837	-0.100518	-0.0531198	-0.195533	-0.382865	-0.0629819	-0.536921	-0.198504	0.113015	0.265132	0.0543007	-0.30287	-0.302597	-0.23724	-0.278806	0.420619	-0.476964	-0.252834	-0.424072	-0.141383	0.311826	0.286755	-0.0826558	-0.17148	-0.288841	0.0596882	0.0277195	-0.170572	0.0659759	-0.156359	-0.0459873	0.282913	-0.144401	-0.0515923	-0.32696	-0.197419	-0.234541	-0.246474	0.0854279	0.0896061	-0.444976	-0.0324446	-0.0996373	0.0405719	-0.0158015	-0.000621256
chr1_30830229_30880286	-0.0883191	0.0574427	-0.765769	-0.796331	0.451932	-0.0364357	-0.171247	-0.329911	-0.0248373	-0.117545	0.00308668	-0.0741964	0.00583567	-0.0538746	-0.154106	-1.72219	-0.190578	-0.73931	0.0823845	-0.183714	-0.146073	-0.479854	-0.895987	0.168933	0.128995	0.0666779	-0.03609	-0.276287	0.1887	0.280052	-0.018803	-0.0564183	-0.119493	-0.0852659	0.202211	-0.158326	-0.439861	-0.561723	-0.036484	-0.807725	-0.0827799	0.123387	0.0217057	-0.537506	-0.203982	-0.318906	-0.301676	-0.176594	-0.458013
chr1_30880286_30936235	-0.0096298	0.375762	0.0659251	0.273035	0.243384	-0.567405	0.245177	-0.388168	0.0183758	0.0750769	-0.109904	0.285741	0.157592	0.00908213	0.0534221	-0.520491	0.0736666	-0.395677	0.229293	0.365134	0.371542	-0.0294532	-0.797257	0.220575	0.169997	-0.209183	0.0781958	0.212504	-0.00799865	0.314099	0.10972	-0.00259624	-0.0351018	0.0880814	0.247666	-0.0330526	-0.325015	-0.0323951	0.115013	-0.415063	0.0134421	0.092753	0.297353	0.377779	-0.223461	-0.00897725	0.0662501	0.0793962	0.104371
chr1_30936235_30988861	-0.107129	-0.0656966	0.069777	-0.159011	0.251158	0.183516	0.0589738	-0.0432967	0.256353	-0.0340781	0.00640918	0.26325	0.282191	-0.0344588	-0.138297	-0.650939	0.168579	-0.254889	0.0658089	0.271424	0.182165	-0.0245535	-0.972452	0.413171	0.372963	-0.0406051	-0.132235	-0.36238	0.223158	0.105877	0.426304	0.0716229	-0.27944	0.192613	0.334157	-0.0536783	-0.555751	-0.0826	0.0259913	-0.42291	-0.167324	0.0641704	0.242162	0.0215991	-0.347757	-0.296556	0.0199003	-0.149396	-5.33431e-05
chr1_30988861_31038855	-0.131135	0.338855	0.717957	-0.0746723	-0.101517	-0.0620249	0.00755416	-0.0762665	0.124285	-0.274844	0.565112	0.1298	0.205552	-0.22936	0.194592	-0.0342087	-0.484904	0.127952	0.126911	-0.0157235	0.0438409	0.301624	-0.445126	0.169711	0.137511	-0.0820218	0.0338476	-0.0479427	0.123158	-0.0290094	0.190455	0.0825835	-0.128102	-0.124467	0.389274	0.0464938	0.0086886	-0.453456	-0.56503	-0.0370875	0.259167	0.025237	-0.0168853	0.0365989	-0.00461608	-0.0670621	-0.122894	0.169544	-0.00208194
chr1_31038855_31091339	0.0650523	-0.0525419	0.244074	-0.324345	0.0600967	0.198546	0.121471	-0.184024	0.0380397	-0.418197	-0.10488	0.257011	0.272971	0.150134	0.311591	-1.03863	0.193521	0.0325467	0.215576	0.00921824	0.00327605	-0.257804	-0.232881	0.497201	0.312814	-0.0219185	0.472494	0.223271	0.174723	-0.0529608	-0.0140208	0.09495	0.167337	0.0607967	0.246748	-0.0927749	0.139129	-0.632053	-0.0114506	0.152718	-0.251597	0.14134	0.308248	-0.18675	-0.074459	-0.312973	0.3351	0.194033	0.0559667
chr1_31091339_31141415	0.263338	0.459377	0.170954	-0.0860565	0.373411	-0.508447	0.307404	0.232712	0.0730321	-0.0984091	-0.144964	0.443089	0.326562	0.0625245	0.141472	-1.15564	0.219705	-0.1287	0.1404	0.303012	-0.25706	0.412898	-0.53484	0.538683	0.468557	0.177015	0.266617	0.166603	0.352437	0.464075	0.0225731	0.132149	0.0955756	0.356371	0.526697	0.354549	0.0567285	-0.135733	0.0788443	-0.517914	0.297861	0.205047	0.281443	-0.0173621	0.318614	-0.00890895	0.0802053	0.0555839	0.283197
chr1_31141415_31191427	0.144837	0.0512892	0.0745446	-0.591786	0.00782158	-0.554766	-0.15243	0.310198	-0.023368	-0.303238	0.130938	-0.00962167	0.120942	-0.244118	-0.132757	-1.1096	0.112787	-0.240261	-0.0031014	-0.127069	0.18568	-0.464382	-0.816022	0.0909133	0.0832102	-0.506205	-0.106376	-0.0231806	0.149895	0.0575015	-0.00632799	-0.0166495	0.101181	-0.112148	0.212321	0.178835	-0.720333	-0.53558	-0.227067	-0.859438	-0.0272462	0.101499	0.476266	-0.0351861	0.35819	-0.473225	-0.0500499	0.0594168	-0.00219737
chr1_31191427_31241438	0.106301	0.0843836	0.301594	-0.363229	0.533031	-0.195117	0.141448	0.065354	0.284046	-0.521453	0.147954	0.398631	0.365781	-0.232171	-0.0963278	-1.29826	-0.327864	0.0503447	0.176796	-0.148902	0.658976	0.0798454	-0.871715	0.337016	0.439278	-0.0510043	-0.234603	-0.0999534	0.160867	0.375177	0.277594	0.166739	0.222302	0.142954	0.397519	0.25527	-0.469969	-1.18092	0.134954	-0.238018	0.134996	0.142934	0.314266	-0.453531	0.572657	-0.146261	-0.00861794	0.0877885	-0.221935
chr1_31241438_31291693	-0.0455166	-0.132004	0.150051	-0.510015	0.201536	-0.684433	-0.142663	-0.0658306	-0.00603607	-0.297487	0.0609514	0.157029	0.156163	-0.372122	-0.489523	-1.35032	-0.0864585	-0.15635	-0.127401	-0.394229	-0.314951	-0.15873	-1.29793	-0.00736129	0.061964	-0.223369	-0.0659011	-0.0237478	-0.0550806	0.490237	-0.071087	0.0287636	0.200485	0.0493182	0.279093	0.0742936	-0.727241	-0.595165	0.314668	-0.833645	-0.299959	-0.0581523	0.19339	0.0486414	0.419838	-0.643522	-0.2452	-0.15102	-0.035468
chr1_31291693_31342016	-0.0592285	-0.233407	-0.287487	-0.517078	0.120215	-0.12562	-0.0104177	0.313951	0.0895102	-0.315745	-0.768977	0.116748	-0.160706	-0.101648	-0.00294953	-0.236683	-0.148099	-0.385668	0.0877696	-0.0638359	0.0496277	-0.258182	-0.641254	0.405415	-0.0766491	-0.170751	-0.355431	0.136252	0.163799	-0.0578365	-0.431393	0.0910999	0.312498	0.196267	0.491063	0.400799	-0.100123	-0.272526	0.197798	-0.540842	-0.0726676	0.0978606	0.243047	-0.58545	0.366561	-0.292928	0.0848511	-0.116393	0.107572
chr1_31342016_31392154	0.130693	0.159687	-0.208923	-0.948453	0.259648	-0.436721	-0.312996	-0.174933	0.113872	-0.527601	-0.233373	0.0375669	-0.00451473	-0.48341	-0.457614	-1.39899	-0.818712	-0.447298	-0.132443	-0.62259	0.208517	-0.545643	-1.25013	-0.135416	-0.143102	-0.223041	-0.428915	-0.366607	-0.0233317	-0.075863	-0.463838	-0.0660467	-0.165801	0.0319096	0.101455	-0.0473796	-0.851688	-0.81057	-0.0789313	-1.04713	-0.439399	0.00581293	-0.0762563	-0.357574	0.422127	-0.406071	-0.38838	-0.338706	-0.269625
chr1_31392154_31442268	-0.0384918	-0.228815	-0.0444559	-0.164485	-0.0252889	-0.419744	-0.597119	0.495327	-0.139	-0.221829	-0.308219	-0.450644	-0.344698	-0.175377	-0.101792	-0.183867	-0.0558903	0.23342	-0.0661468	0.225749	-0.318158	-0.269077	-0.135981	-0.327397	-0.24008	-0.199389	-0.519442	0.0747157	-0.315614	-0.0693059	-0.00804013	-0.385764	-0.293001	-0.359861	0.179273	-0.0361587	0.311045	0.55787	-0.36156	-0.690144	-0.14334	-0.136814	-0.182726	0.548337	-0.178997	-0.0770218	-0.306438	-0.40452	-0.238876
chr1_31442268_31492375	-0.0854351	-0.269363	-0.864183	-0.17133	-0.248406	0.120047	-0.253541	0.465565	-0.214685	0.302133	0.0585973	-0.204775	0.027212	-0.276411	-0.0722679	0.207305	0.0103968	0.0568819	0.00286685	0.184484	-0.482477	-0.122079	0.250029	-0.139757	-0.318021	-0.0641256	-0.0164282	0.253182	-0.136521	-0.0248416	-0.142491	-0.0864306	0.00311918	-0.23488	0.131133	0.11639	-0.212336	-0.142671	-0.248193	-0.530749	-0.033854	-0.146956	-0.147033	-0.156478	0.171635	-0.0123292	-0.131673	0.289734	-0.00310165
chr1_31492375_31542829	-0.541859	-0.358355	-0.913261	0.313474	-0.499264	0.721994	-0.379858	-0.0539299	-0.320144	0.56343	-0.142705	-0.188364	-0.463224	0.133781	0.144864	0.919192	-0.150836	0.263012	0.187206	0.634125	-0.279044	0.138592	0.0126247	0.0767081	-0.51865	-0.054075	-0.0262826	0.119947	-0.366716	-0.551604	0.380646	0.0445622	-0.274145	-0.0624303	0.133158	-0.0763725	0.608837	0.806264	-0.48652	0.260112	0.162819	-0.380213	-0.347256	-0.665704	-0.143811	-0.0646159	-0.362354	-0.233768	-0.378936
chr1_31542829_31593309	-0.256218	-0.597506	-0.127043	0.281626	-0.461005	-0.514465	-0.512152	-0.121987	-0.856887	-0.0379353	-0.860836	-0.193768	-0.874162	-0.274106	-0.278392	0.280432	-0.0375987	-0.550064	-0.397514	0.28875	-0.572786	-0.941881	0.104217	-0.306647	-1.28592	-0.367329	-0.555608	-0.638555	-0.329685	-0.312923	0.0197072	-0.618225	-0.493687	-0.41619	0.186901	-0.597206	-0.193805	0.318787	-0.738568	-0.523227	-0.457046	-0.596118	-0.260308	-0.46175	-0.106095	-0.0794613	-0.405983	0.0872494	-0.295892
chr1_31593309_31643767	-0.373664	-0.250738	-0.682262	-0.473165	-0.274377	-0.624712	-0.470184	0.186099	-0.308548	-0.0258799	-1.36665	-0.223154	-0.807319	-0.42636	-0.525843	-0.0376713	-0.273222	-0.855759	-0.171704	0.0300769	-0.574134	-0.539758	-0.630447	-0.497526	-1.4122	-0.0479848	-0.670748	-1.25433	-0.126949	-0.548641	-0.211384	-0.674498	-0.600149	-0.465229	-0.306814	-0.239565	-0.662847	0.211637	-0.470588	-0.692104	-0.828474	-0.485076	-0.455806	0.0568978	-0.556351	-0.561945	-0.457303	-0.506534	-0.598577
chr1_31643767_31694906	-0.239488	-0.584752	-1.38911	-0.601431	-0.344103	-1.41789	-0.442707	-0.156301	-0.197675	-0.415953	-1.43635	-0.172998	-0.491791	-0.530723	-0.549466	-0.368058	-0.52905	-0.794747	-0.246815	-0.340678	-0.730562	-1.13165	-0.827605	-0.326282	-1.20578	-0.620001	-1.0283	-1.05076	-0.236114	-0.392371	-0.281081	-0.426765	-0.45925	-0.156259	-0.0320922	-0.678588	-0.555989	-0.370048	-0.672523	-0.664549	-0.543063	-0.304805	-0.102787	-0.461623	-0.345356	-0.486906	-0.233872	-0.469231	0.0619879
chr1_31694906_31745150	-0.51917	-0.291076	-0.418142	0.390631	-0.139872	0.615036	-0.42207	0.57561	-0.145691	0.471051	-0.502801	0.00933598	-0.332373	-0.028594	-0.133672	0.960221	0.149703	-0.128331	-0.301382	0.664933	0.128662	-0.135297	-0.376868	0.211604	-0.630848	-0.163294	-0.155283	-0.567972	-0.125087	-0.685436	0.443899	-0.30756	-0.287754	-0.0614661	0.229189	-0.262596	0.357812	0.897599	-0.438387	0.213241	-0.203357	-0.00357765	-0.00135001	-0.0335467	-0.409381	-0.0304371	-0.26502	0.0572571	-0.118679
chr1_31745150_31795298	-0.326913	-0.40584	0.1355	0.0801556	-0.370213	-0.584724	-0.576537	-0.342843	-0.281691	-0.428101	0.0645214	-0.656997	-0.431256	-0.272793	-0.0621364	-0.00536557	-0.518382	0.406714	-0.300831	-0.286309	-0.776091	-0.156612	-0.217096	-0.501748	-0.584409	-0.355757	-0.0646602	0.282432	-0.000544407	-0.0590512	-0.471568	-0.411769	-0.233921	-0.435017	0.169254	-0.467306	0.529924	-0.283131	-0.391997	0.37509	-0.232272	-0.37666	-0.176567	-0.906531	-0.329704	-0.178876	-1.04727	0.126079	-0.360264
chr1_31795298_31845520	0.0356814	-0.136308	0.298728	-0.166656	-0.0726728	-0.111665	-0.254376	-0.0539898	-0.183809	-0.586097	0.189002	-0.0218644	0.025298	-0.188358	-0.0617416	0.616636	-0.250441	0.516311	-0.0903675	0.0488959	-0.00636873	0.178917	-0.619101	-0.0792618	-0.140276	0.0695754	0.132042	0.183586	-0.194144	-0.00641562	0.0369509	0.00911579	-0.119618	-0.075442	0.245738	-0.195923	0.0818342	0.181757	-0.0329998	-0.305368	0.0198402	-0.110575	-0.231873	0.500376	-0.0683746	-0.259417	-0.123717	-0.343533	-0.227175
chr1_31845520_31895636	-0.0768139	-0.238112	-0.700621	-0.144887	-0.307313	-0.377773	-0.108804	0.470911	-0.37606	-0.248444	-0.408744	-0.130346	-0.639554	-0.253389	-0.236795	-0.149126	-0.253154	-0.39508	0.05345	0.0699631	-0.199638	-0.393529	-0.361974	-0.0234694	-0.372535	-0.260728	-0.33824	-0.881174	0.0260574	-0.231987	0.205859	-0.12836	-0.179421	-0.0697089	0.259297	0.0681583	-0.190396	0.0534197	-0.478194	-0.440478	0.051879	-0.0857854	-0.314285	-0.207107	0.389763	-0.374856	-0.195394	0.0431976	-0.125604
chr1_31895636_31945824	-0.348346	-0.406829	-0.178505	-0.457093	-0.170655	-1.0181	-0.607597	-0.527471	-0.492847	-0.558259	0.544778	-0.318474	-0.489628	-0.551948	-0.200134	-0.41919	-0.122584	0.387443	-0.559081	-0.562024	-0.668697	0.294693	-0.221897	-0.0109522	-0.508509	-0.489396	0.000472416	0.28971	-0.185122	-0.208284	-0.19179	-0.278577	-0.310438	-0.201121	0.0393302	-0.225768	-0.29922	-0.823815	-0.581468	0.0291103	0.104479	-0.534922	-0.497846	-0.95727	-0.274658	-0.403852	-0.365223	-0.351218	-1.08105
chr1_31945824_31997146	0.117755	-0.103967	0.0408567	0.363176	-0.104514	-0.360463	0.120919	-0.0248696	0.116587	-0.0573488	0.0900214	0.198032	0.0428006	0.0669474	-0.119035	-0.162044	-0.1944	-0.0194056	-0.181863	0.420901	0.411123	-0.0183234	0.0776999	0.138336	-0.0946386	-0.028401	0.0445877	0.263527	0.338357	0.0327272	0.132834	-0.0569568	-0.0517839	0.149799	0.280819	0.938096	0.115891	0.331502	-0.55503	-0.431422	-0.0906989	-0.0121962	0.426637	-0.0168483	0.309733	0.122722	0.0917564	0.0405508	-0.280066
chr1_31997146_32047606	0.145366	-0.245768	0.2823	0.172337	0.0492069	-0.288981	-0.00018802	0.0714161	-0.00578637	0.1313	0.283065	0.0394794	-0.0308443	-0.127804	-0.047072	0.331908	-0.134317	-0.00532185	-0.0372462	0.204474	0.377615	-0.00724011	-0.319285	0.23155	-0.408371	-0.14688	0.0231711	0.516315	-0.117459	-0.326153	0.150026	-0.07763	-0.261814	-0.0494477	0.29547	0.0887692	0.360556	0.161716	-0.0961352	-0.159749	-0.0277437	-0.0983518	-0.248059	-0.923107	0.452407	-0.308282	-0.237745	-0.280777	0.0689217
chr1_32047606_32097784	-0.0575511	0.0647038	0.701551	0.173434	0.121575	-0.022677	0.11803	0.148159	0.267607	0.124669	0.416045	0.141863	0.18609	-0.0174031	0.178953	-0.304469	-0.259202	0.290403	-0.144739	0.198783	0.491227	-0.145897	-0.329766	0.366207	0.112503	0.140122	0.0741383	0.580642	-0.0675964	0.397582	0.545708	0.10578	0.222831	0.103484	0.485716	0.187164	0.401677	0.365909	-0.158636	0.337868	0.264065	-0.0962292	-0.0276726	0.167549	0.251246	0.00553289	-0.313908	-0.0874461	0.227247
chr1_32097784_32147804	0.258804	0.188753	0.361419	-0.243529	0.239538	-0.313181	0.057182	-0.0168607	0.120539	-0.196509	0.0652369	0.271814	0.455718	0.144519	0.048645	-0.820698	-0.064215	0.176455	0.00374268	-0.110001	0.269879	0.292241	-0.528625	0.367794	0.415364	0.0169024	-0.117478	0.764935	0.132916	0.401362	0.16262	-0.0777367	0.260022	0.43031	0.672274	0.538671	0.0767925	-0.495803	0.022939	0.182372	0.156409	0.305185	0.334309	-0.0748601	0.365982	-0.294649	0.248021	-0.0511836	0.1918
chr1_32147804_32197940	0.234082	0.19386	-0.370009	-0.18469	0.378021	-0.0331614	0.235105	-0.174228	0.13638	-0.242549	-0.260017	0.44132	0.20959	0.0827696	-0.00317019	-0.42418	-0.388583	-0.195528	0.130936	0.0240953	0.290691	0.0772159	-0.350527	0.353468	0.254147	-0.156224	-0.0853812	-0.244055	0.0594932	0.192327	0.0239937	0.364263	0.383905	0.241935	0.545343	0.626679	-0.151375	-0.449451	0.203958	0.0365984	-0.14568	0.2529	-0.0932666	0.0752671	0.552216	-0.251841	0.174111	-0.0792856	0.185541
chr1_32197940_32248027	0.128524	0.0614877	0.0147713	-0.315211	0.442912	-0.238462	0.0247945	-0.458874	0.257556	0.43515	-0.125883	0.201253	0.335421	0.126918	-0.186009	-0.351932	-0.217395	-0.00206596	0.157824	0.568802	0.00027335	0.310837	-0.318117	0.470445	0.258364	-0.00615577	-0.259555	0.145965	0.403594	0.176271	0.293711	0.0880864	0.327743	-0.00861031	0.298699	0.440902	-0.128567	0.0170328	0.162441	0.0154107	0.359852	0.170093	0.442245	-0.21008	0.295741	-0.126099	0.0853326	-0.321511	-0.0124959
chr1_32248027_32298157	0.209877	-0.0861648	0.716253	0.169656	-0.346202	-0.430711	-0.238853	0.0540675	0.0157982	-0.418075	0.968036	-0.0303714	0.193056	-0.150195	0.27372	-0.498113	0.000191166	1.20075	-0.16462	0.139976	0.224189	0.412667	-0.497569	0.491845	0.372637	-0.00179902	0.609645	0.730266	0.177324	0.173342	-0.437157	-0.216102	0.138463	-0.0236535	0.394595	0.184634	0.63907	-0.0473847	0.0473324	-0.193845	0.362462	-0.0986863	-0.0262424	-0.327836	0.0920146	0.101997	0.203934	-0.204999	-0.395287
chr1_32298157_32348831	0.190735	-0.0237222	-0.414516	-0.659535	0.260998	0.199945	-0.0464201	-0.0237469	0.0736153	-0.0289039	-0.461366	0.0211744	-0.244736	0.0991574	0.181866	-0.171783	-0.0847782	-0.0949628	-0.00950903	-0.0155777	-0.0520307	0.301328	-0.504031	-0.123026	-0.240296	-0.061313	-0.25251	-0.323519	0.227415	0.212013	0.280317	-0.0840848	0.150459	0.127954	0.389301	0.26466	-0.24973	0.131212	-0.198978	-0.802145	0.000710201	-0.114164	0.0543391	-0.107467	0.0412671	-0.220587	0.0314885	-0.103384	-0.0318109
chr1_32348831_32399455	-0.123976	-0.152414	-1.0161	-0.453849	-0.146394	-0.417972	-0.574306	-0.136327	-0.314227	-0.588322	0.0679209	-0.378743	-0.338778	-0.545525	-0.450816	0.0275419	-0.481418	-0.467401	-0.247559	-0.49847	-0.252535	-0.435733	-0.16955	-0.461088	-0.674537	-0.167881	-0.318775	0.0251032	-0.362782	-0.453428	-0.571967	-0.380264	-0.496254	-0.337257	0.0019919	-0.319674	-0.498044	0.0238118	-0.754773	-0.758508	-0.627629	-0.580389	-0.708225	-0.278004	0.0496104	-0.606879	-0.357962	-0.0293026	-0.23154
chr1_32399455_32449834	-0.346767	-0.219477	-0.365806	0.268749	-1.03218	0.0502928	-0.559741	0.0152302	-0.496239	-0.0194499	-0.423755	-0.144468	-0.482003	-0.0278239	-0.327124	0.674712	-0.594743	-0.365204	-0.240868	0.224614	-0.584515	-0.757019	0.149821	-0.238098	-0.642568	-0.0330005	-0.807581	0.12519	-0.427324	-0.68566	-0.605225	-0.18719	-0.221005	-0.202793	0.033861	-0.0342587	0.0759014	-0.0203066	-0.366993	0.101803	-0.081971	-0.438483	-0.508229	0.0865108	0.0436851	-0.373256	-0.317559	-0.553497	-0.401869
chr1_32449834_32500461	-0.331626	-0.633131	-0.994249	0.635456	-0.570472	0.194225	-0.136649	0.346854	-0.272432	0.890197	0.256768	-0.440099	-0.776156	0.455228	0.367264	2.04759	0.300355	0.343174	0.158494	0.876713	-0.193384	-0.377542	0.543069	0.133012	-0.696724	0.15985	-0.277089	0.622129	-0.142281	-0.594617	0.260356	-0.244136	-0.291903	-0.254385	0.198796	-0.362757	1.15476	1.30728	-0.472692	0.595942	-0.238892	-0.183753	-0.25831	0.539942	-0.158269	-0.0625472	-0.519854	-0.0479606	-0.157546
chr1_32500461_32551182	-0.304115	-0.805505	-1.51364	-0.0882612	-0.579776	-0.0730454	-0.563348	-0.240315	-0.50465	-0.585021	-1.02294	-0.483374	-0.605846	-0.404441	-0.632766	-1.36659	-0.602902	-0.568359	-0.701255	-0.41583	-0.57615	-0.674845	-0.789231	-0.294372	-0.803653	-0.371318	-0.566821	-1.3324	-0.310148	-0.381848	-0.39995	-0.499057	-0.412053	-0.250154	-0.116374	-0.292142	-0.498508	-0.375846	-0.605221	-1.17824	-0.464997	-0.436054	-0.306925	-0.56624	-0.490967	-0.702833	-0.913854	-0.30555	-0.335955
chr1_32551182_32601723	-0.170394	-0.235245	-0.426228	-0.021952	-0.0423628	-0.120852	-0.330082	-0.148462	0.0185983	-0.320291	-0.236588	-0.152974	-0.548267	-0.482767	-0.0787878	-0.685798	-0.850282	0.0731708	-0.2733	0.128582	-0.107039	-0.5024	-0.432272	-0.316611	-0.73365	-0.297982	-0.382517	-0.0170116	-0.44772	-0.0743211	-0.257307	-0.291935	-0.23896	-0.0287729	0.243453	-0.245121	-0.430326	-0.217881	-0.0900018	-0.271757	-0.398723	-0.324055	-0.17002	-0.178977	-0.0219729	-0.527243	-0.169091	-0.429671	-0.00274876
chr1_32601723_32652134	-0.484132	-0.242817	-0.553918	0.138943	-0.15584	-0.157255	-0.654326	0.120283	-0.126564	0.18459	-0.250063	-0.421438	-0.41411	-0.0989062	-0.140572	0.838392	-0.318819	-0.277549	-0.129764	0.25203	-0.518908	0.0972223	0.0018838	-0.0374066	-0.825978	0.11357	-0.283616	-0.169654	-0.00773174	-0.110958	-0.234389	-0.0988318	-0.25147	-0.085458	0.192524	-0.0316485	0.346062	0.244784	-0.275765	0.0108986	-0.537915	-0.231787	-0.538089	0.289194	-0.0673453	0.200854	-0.491478	-0.0419654	0.0845444
chr1_32652134_32702363	0.20048	0.0876725	-0.592089	0.0227534	-0.0994537	0.141094	-0.114774	0.133472	-0.0510673	-0.512596	-0.205421	0.0611737	-0.117431	0.0198081	-0.224061	-0.299154	0.126137	-0.538158	0.0169298	0.0425655	-0.14669	-0.120535	-0.414157	0.310573	-0.168161	-0.152274	-0.416737	-0.313851	-0.0830016	-0.092915	-0.273768	0.0651858	-0.403517	0.103872	0.292643	0.391989	-0.0987308	-0.195065	-0.175408	-0.275372	-0.192839	-0.283865	-0.157158	-0.574327	0.358875	-0.089385	-0.10889	-0.246029	-0.194208
chr1_32702363_32752601	-0.319183	-0.0899403	-0.267353	0.039076	-0.0374871	-0.0626196	-0.319136	0.00106758	-0.403997	-0.386344	-0.39664	-0.185368	-0.438099	0.0772844	-0.321988	0.696862	0.10471	-0.430697	-0.325969	0.0916731	-0.441559	-0.0769849	-0.0685319	0.0851612	-0.911628	-0.070986	-0.225491	-0.0795053	-0.49058	-0.593838	-0.228431	-0.239518	-0.169709	-0.367109	0.203179	0.0812739	0.645343	0.614832	-0.414655	0.389583	-0.422337	-0.360579	-0.319062	-0.157477	-0.0451725	-0.270884	-0.255533	-0.435126	-0.12324
chr1_32752601_32803174	-0.693508	-0.832459	-0.323208	-0.0129656	-0.280969	-0.638353	-0.671382	-0.106601	-0.294437	-0.0894858	-0.95544	-0.601616	-0.876709	-0.607618	-0.659683	0.245922	-0.487985	-1.2131	-0.475988	0.170829	-0.254619	-0.772161	-0.00730625	-0.469521	-1.10589	-0.603973	-0.948579	-0.722963	-0.375534	-0.832095	-0.403152	-0.539672	-0.914096	-0.487066	-0.0885144	0.0120297	0.0945463	0.354348	-0.563372	-0.537136	-0.365502	-0.391991	-0.664134	-0.303633	-0.0123175	-0.187347	-0.362958	-0.244851	-0.928964
chr1_32803174_32853567	-0.101291	-0.139771	-0.350474	0.45713	-0.199381	1.29419	-0.330591	0.18119	-0.26879	0.940036	-1.33862	-0.284709	-0.765583	0.362108	-0.291736	0.822446	0.470685	-0.702189	0.0329862	1.14802	0.00522261	-0.1182	0.357579	-0.0538588	-0.769546	0.253476	-0.52586	-1.10411	0.0470505	0.0548598	0.660652	0.105135	0.0570502	-0.146744	0.439368	-0.180346	0.45347	1.2766	-0.28165	-0.37439	-0.214798	0.0847918	0.0375659	0.338794	-0.0129412	0.373425	-0.274731	-0.421661	0.0583815
chr1_32853567_32905204	0.0083216	-0.0831749	-0.198804	0.0287259	0.176031	0.326073	-0.374543	0.115102	-0.100706	-0.116452	-0.0835438	-0.291071	-0.39785	-0.194829	-0.392374	-0.00244813	-0.677223	0.174098	-0.0424871	0.0256408	-0.386447	-0.579163	-0.608438	-0.0632861	-0.490505	-0.515775	-0.25951	-0.456773	-0.000577465	-0.395602	-0.415102	-0.440386	-0.513436	-0.280178	0.22003	-0.0313785	-0.104692	-0.0193002	0.0729521	-0.820645	-0.307498	-0.19883	-0.188186	-0.141578	-0.233697	-0.2086	-0.318658	-0.12576	-0.143396
chr1_32905204_32955568	-0.305116	-0.115015	-0.995028	0.0789337	-0.311606	0.194171	-0.421048	-0.573822	-0.533485	0.0978295	-0.440311	-0.226783	-0.513539	-0.171913	-0.326426	0.43285	-0.601442	-0.0723709	-0.0507896	-0.111513	-0.50111	0.0623993	0.147223	-0.166691	-0.486012	-0.220448	-0.387004	-0.376951	-0.277764	-0.131873	-0.259855	-0.427525	-0.190872	-0.427854	0.266838	-0.739347	0.448911	0.216947	-0.598299	0.198466	-0.65397	-0.448546	-0.0956958	-0.457647	-0.280204	-0.200191	-0.319776	-0.406323	-0.259408
chr1_32955568_33006287	-0.443085	-0.594414	-0.633179	0.290112	-0.00906712	-0.649712	-0.603125	0.424772	-0.261165	0.399021	0.258941	-0.350242	-0.465069	-0.1556	-0.343727	0.386406	-0.267493	-0.2832	-0.0501134	0.196183	-0.571185	-0.326444	-0.0554973	-0.342937	-0.417804	0.0879597	0.198832	0.23404	-0.653267	-0.219225	-0.323341	-0.260425	0.0356795	-0.161784	0.121794	-0.145761	-0.214587	0.439423	-0.664994	0.199666	0.0570619	-0.334115	-0.215698	0.44099	-0.094811	-0.258578	-0.119994	-0.333914	-0.446801
chr1_33006287_33056665	-0.435447	-0.184138	0.429055	-0.500756	-0.453449	-0.452361	-0.527735	-0.405163	-0.238025	-0.337554	-0.609306	-0.353253	-0.378058	-0.472638	-0.304344	0.499716	-0.419194	-0.231409	-0.184311	0.0510854	-0.616749	-0.11738	-0.29237	-0.254198	-1.14075	-0.383249	-0.58566	-0.394156	-0.481875	-0.263435	-0.430937	-0.253556	-0.211805	-0.189454	0.0646035	-0.476439	-0.262667	0.596042	-0.322057	-0.307454	-0.167692	-0.300579	-0.311969	0.0115505	-0.110513	-0.0677292	-0.931656	-0.194998	-0.476854
chr1_33056665_33107102	-0.765457	-0.458518	0.196138	0.401869	-0.382731	0.464679	-1.02612	-0.165561	-0.715169	-0.0945172	0.404835	-0.330513	-0.401644	-0.308017	-0.0339426	0.203771	-0.221767	0.0964137	-0.430909	-0.221266	-0.488793	0.399251	-0.065208	-0.0147527	-0.854025	-0.451175	0.114529	0.213419	-0.80926	-0.404396	-0.113928	-0.543346	-0.384428	-0.413635	-0.0133747	-0.942311	0.310381	0.430012	-0.785519	-0.398425	-0.36977	-0.607502	-0.575711	0.259951	-0.430654	-0.763158	-0.479266	-0.506004	-0.536519
chr1_33107102_33157644	-0.550263	-0.511158	-0.319954	0.274472	-0.444308	0.146235	-0.933012	-0.432164	-0.700137	-0.238776	-0.343189	-0.501711	-0.425257	-0.183394	-0.490105	1.29873	-0.393939	-0.125918	-0.414788	-0.0296773	-0.812968	-0.698459	0.481847	-0.417704	-1.06834	-0.645929	-0.0658314	-0.0116141	-0.857606	-0.88025	-0.19303	-0.601622	-0.489486	-0.635988	-0.193195	-0.442097	0.330194	0.120923	-0.833263	0.182133	-0.778675	-0.603661	-0.678254	-0.525085	-0.576915	-0.572048	-0.59077	-0.32981	-0.737234
chr1_33157644_33208513	-0.32673	-0.345738	-1.42337	-0.315628	-0.151271	0.566531	-0.743718	0.73555	-0.269537	0.365479	-1.41006	-0.386227	-1.00474	-0.244637	-0.703087	0.0658067	-0.845798	-1.6057	-0.489326	0.811462	-0.143233	-0.685786	-0.323309	-0.498589	-1.29813	-0.322999	-0.89559	-1.28377	-0.218497	-0.484483	0.219542	-0.270284	-0.273117	-0.289211	-0.0116428	-0.149126	-0.500701	0.479104	-0.419154	-0.92206	-0.657808	-0.109199	-0.123132	0.20118	-0.135993	-0.214183	-0.613775	-0.0581502	-0.214147
chr1_33208513_33258879	-0.136216	-0.105575	-0.478276	0.241185	-0.182613	0.542767	-0.285965	-0.467038	-0.15781	0.257104	-0.509393	-0.442426	-0.311404	0.0508179	-0.0647656	0.869204	0.169306	-0.205125	-0.201964	0.504658	-0.146524	0.205814	0.173953	0.254738	-0.363698	-0.0881682	-0.23509	0.0637615	-0.281709	-0.0872844	-0.195502	-0.190411	0.117717	-0.180969	0.0834398	0.113984	0.664399	0.756913	-0.0974019	0.613987	0.129951	-0.321418	-0.276755	0.392985	-0.0631836	-0.12768	0.140839	-0.0658404	-0.454556
chr1_33258879_33309828	-0.325724	-0.247778	0.3208	0.262073	-0.117699	-0.590001	-0.133495	-0.340705	-0.297296	-0.208356	0.464586	-0.250778	-0.533584	-0.2652	-0.254688	0.436018	0.141104	0.140992	-0.0995112	-0.133352	-1.16537	0.389215	-0.611758	0.0985831	-0.369628	-0.142618	0.0180053	-0.159487	0.0925179	-0.431469	0.172673	-0.407192	-0.0442683	-0.309241	0.214375	-0.357182	0.708344	0.266512	-0.533468	0.592414	-0.0781976	-0.209903	-0.223057	-0.509829	-0.300488	-0.251254	-0.0457201	-0.626543	-0.111231
chr1_33309828_33360013	-0.110241	-0.101602	-0.322532	-0.328918	-0.344349	-0.508475	-0.552951	-0.394471	-0.453023	0.352084	-0.250658	-0.411318	-0.152596	-0.216757	-0.438618	-0.468823	-0.609692	-0.0357085	-0.0395141	-0.296817	-0.146177	0.105784	-0.359965	-0.112057	-0.113953	-0.317669	-0.0281201	-0.292535	0.0376118	-0.129444	-0.114769	-0.154729	0.0771934	-0.337961	0.165199	-0.019387	-0.34493	-0.218203	-0.380484	-0.450935	-0.111157	-0.147585	-0.101218	0.0438854	-0.329338	-0.616558	-0.328841	-0.458772	-0.290816
chr1_33360013_33410510	0.216875	-0.348439	0.145909	0.394938	-0.0416334	0.328035	-0.047174	0.281777	-0.0407183	0.252865	0.434226	-0.231236	0.00281651	0.226801	0.244494	0.73572	-0.20146	0.414732	-0.163975	0.258292	0.274231	0.123392	-0.0732506	0.349541	-0.0685885	0.0241406	0.241564	0.670327	0.333696	-0.104291	0.0704	-0.0803687	-0.0315522	0.0231476	0.232186	0.562875	0.718774	0.780498	-0.00356585	0.472756	-0.0118009	-0.157047	-0.0893161	0.00703306	0.512473	0.0404341	-0.00777149	0.0554288	-0.0949511
chr1_33410510_33461876	0.0106861	-0.267774	0.107016	0.932356	-0.178302	1.0947	-0.117443	0.928435	-0.167672	0.840847	-0.502048	0.0464137	-0.529942	0.295545	0.128261	1.69708	0.6209	-0.0251568	0.0385025	1.03723	0.352746	0.00619364	0.357639	0.108815	-0.243005	0.237088	-0.21596	-0.761586	0.0515458	-0.0828065	0.389208	-0.121812	-0.0381115	-0.140524	0.472503	0.589032	0.955788	1.31783	-0.493365	0.123546	-0.430535	0.080329	-0.271311	0.540724	0.330794	0.288438	-0.0791532	0.260124	-0.0454063
chr1_33461876_33512322	0.282521	-0.013002	-0.022083	-0.279412	0.401061	0.545366	-0.0710232	0.22154	0.076358	-0.622668	0.53499	0.236786	0.0461673	0.166215	0.0970972	0.379403	-0.170699	0.42883	0.00870271	0.453037	0.351927	0.300337	0.103871	0.324552	0.194821	0.0474204	0.262793	0.358552	-0.146575	0.0279439	0.459436	0.201021	0.520609	0.405938	0.42074	0.61502	0.372703	-0.409636	-0.178256	0.117117	0.0491783	0.0838717	0.302713	-0.0483155	0.483087	0.0709334	0.0504714	-0.170596	0.189233
chr1_33512322_33564491	0.0132917	-0.414236	-0.449658	-0.745305	0.13982	-0.108136	-0.0451328	0.0456823	0.0388479	-0.0198942	-0.269542	-0.149562	0.0170056	-0.092314	-0.239021	-0.5177	-0.345821	-0.31395	-0.0760404	0.0419108	-0.198673	-0.31999	-0.350026	-0.134829	-0.130615	-0.378534	-0.296257	-0.0628565	0.157269	-0.179884	0.233406	-0.108011	-0.189132	0.00809705	0.321323	0.0827712	-0.493698	-0.217302	-0.536822	-0.27592	-0.118323	-0.157233	0.064824	-0.477645	0.292137	-0.272188	-0.320545	-0.218952	-0.126199
chr1_33564491_33614797	-0.0718582	-0.133234	-0.0515149	-0.162661	0.292523	-0.693536	-0.090001	-0.206318	-0.0939815	0.000141778	0.0424975	-0.158866	-0.00483156	-0.353617	-0.0113298	-0.39685	-0.205111	0.354098	0.0576881	0.0547922	-0.39655	-0.0574863	-0.703555	0.12255	-0.00913006	-0.453267	-0.207099	0.690776	-0.180364	0.107145	-0.505555	-0.0806379	-0.182791	-0.181377	0.381437	-0.0133871	0.137211	-0.407506	-0.119217	-0.137112	-0.207897	0.027029	0.0748112	0.17323	-0.31303	-0.0807225	-0.115844	0.0732611	0.201135
chr1_33614797_33664979	-0.0584494	-0.0329883	-0.128202	0.583237	-0.118179	0.333878	-0.122343	-0.396267	-0.448119	0.145683	0.13157	-0.185451	-0.158603	0.311656	-0.0116342	1.56877	0.183637	0.325969	0.0344643	0.906116	-0.26019	0.438128	0.304594	0.39644	0.0429679	0.0200852	0.126574	0.178666	-0.272493	-0.398231	-0.146681	-0.0437856	0.17922	-0.383536	0.421263	-0.161783	1.41408	0.559723	-0.252181	1.00613	-0.200169	-0.107793	-0.210737	-0.491555	-0.106568	0.168271	-0.133177	-0.356548	-0.257748
chr1_33664979_33715918	0.0395889	-0.0972533	-0.160857	-0.355632	-0.0668543	0.46898	-0.112913	-0.221267	-0.0168497	0.125984	-0.350728	-0.0308966	-0.235111	-0.285323	-0.222592	-0.467628	-0.051039	-1.09999	-0.00287088	-0.665947	-0.00696247	-0.51948	-0.346918	0.0900283	-0.154011	-0.187137	-0.155492	-0.0764187	-0.232692	0.020537	-0.331886	-0.0723556	-0.0421151	-0.0550639	0.316845	-0.0128129	-0.231725	-0.348377	-0.252912	-0.611693	-0.391678	-0.173818	-0.143037	0.0786471	-0.313285	-0.100518	-0.0961593	0.00144982	0.0114049
chr1_33715918_33767329	-0.106464	0.220405	0.26356	0.468628	0.24076	0.406119	0.00569678	0.785823	0.0803324	0.759558	0.0399182	0.269387	0.0518044	0.321656	-0.0987917	0.504281	0.100859	0.339239	0.210369	0.486599	0.0525521	0.202645	0.108742	0.567224	0.121798	-0.0551267	0.0168342	0.174261	0.457309	0.38697	0.209203	0.263862	0.142313	-0.156497	0.443314	0.0956433	0.588182	0.479172	0.0692577	0.340608	0.269002	0.193692	0.0528378	-0.302936	0.0758806	0.110891	0.145009	-0.371174	0.246308
chr1_33767329_33817716	0.0521714	0.180793	-0.00503226	0.124589	-0.234873	0.0439252	-0.0863329	0.605173	-0.0942389	0.660833	-0.41656	-0.0171927	-0.0302581	0.322074	-0.186506	0.786668	-0.110002	-0.173539	0.357489	0.967688	0.0530583	-0.436744	0.22305	0.0991067	-0.237928	0.285737	-0.238773	-0.303211	0.0737569	0.0682466	0.474269	0.0163078	0.219945	-0.310934	0.425105	-0.207776	0.540326	0.965315	-0.254441	0.32244	0.232612	0.237378	0.103494	0.746187	0.256336	0.136168	0.20564	0.0101838	0.0287305
chr1_33817716_33868055	0.182513	0.100409	0.709275	0.633133	-0.279254	-0.322234	0.106669	-0.206056	-0.0414728	0.0384721	1.27019	0.205413	0.509197	0.196178	0.32582	0.0854274	0.446788	0.981525	0.327819	0.061494	0.169886	0.408545	0.0322849	0.731305	0.734118	-0.267714	0.767309	1.42814	0.140718	0.414103	0.0214966	0.19229	0.167196	0.105036	0.641056	0.0994235	0.988615	-0.173137	0.269197	1.02686	0.370445	-0.0334071	0.00131617	0.163852	0.24797	-0.0888961	0.254494	-0.0718963	-0.241022
chr1_33868055_33918298	-0.134157	-0.281548	0.115796	0.78466	-0.413114	0.376309	-0.259829	0.581763	-0.11875	-0.0288151	-0.128355	-0.175711	-0.170466	0.124953	0.0317439	0.453636	-0.299667	0.187063	-0.0666923	0.665139	-0.248596	0.394445	-0.150869	0.113584	0.0108154	0.237492	-0.49395	0.185581	0.0218999	-0.37889	-0.0380964	0.0406212	-0.0941553	-0.205739	0.196759	-0.0603204	0.584239	0.361524	-0.822379	0.55037	-0.232439	-0.133849	-0.110815	-0.081131	-0.0301259	-0.178106	-0.0390469	-0.554533	-0.0839491
chr1_33918298_33968450	0.419753	0.291879	0.210251	0.20412	0.548102	0.533995	0.22675	0.12131	0.263872	0.109481	0.504949	0.335301	0.367973	0.331806	0.278537	-0.476854	0.359127	0.444516	0.378326	0.295951	0.416412	0.247322	-0.122809	0.404898	0.380672	0.0181741	0.282974	0.403837	0.219305	0.0425125	0.00636975	0.200181	0.566079	0.218762	0.556645	0.21239	0.026505	-0.560341	0.420659	0.15987	0.206543	0.332616	0.309921	-0.381905	0.0167968	0.299728	-0.070223	0.102621	0.41544
chr1_33968450_34019112	0.278704	0.390157	0.387969	0.125509	0.157888	-0.493096	0.0371038	-0.254469	0.252521	-0.0449052	1.20223	0.457864	0.474698	0.0251433	0.518599	-0.989711	0.23889	0.765326	0.213962	0.298457	0.0840614	0.726043	-0.488955	0.467578	0.53488	-0.0801259	0.596189	0.550621	-0.171639	0.561444	0.0106958	0.0701276	0.0706768	0.313519	0.424312	0.00748904	0.0834324	-0.096924	-0.38451	0.0281205	0.297432	0.157493	0.298697	-0.761572	0.105804	0.117751	0.211053	-0.0345143	0.114979
chr1_34019112_34069140	0.106324	-0.0685707	-0.254024	-0.291774	0.145638	-0.00509892	-0.131358	0.201456	0.189858	-0.171439	0.0245602	0.268472	0.132424	-0.0797487	-0.132712	-0.666037	-0.309964	-0.317605	0.378014	0.0895702	0.344773	0.0984923	-0.678217	0.336129	0.137547	-0.186041	-0.213841	0.352388	-0.00259992	0.0815156	0.405511	0.229377	0.246952	0.0827048	0.415269	-0.0366144	0.0259587	-0.456988	-0.35081	0.0709245	0.209672	0.152188	0.194195	0.205652	0.135019	-0.280148	-0.0659334	0.305973	0.314531
chr1_34069140_34119206	0.165832	0.258198	0.491115	0.355142	0.514029	0.289987	-0.0523058	0.400423	0.110136	0.0463968	0.956575	0.276049	0.770933	0.196388	0.276241	-0.373853	0.68211	0.562271	0.393842	0.161665	0.257408	0.656434	-0.0645646	0.669	0.720147	-0.0654277	0.364202	0.913711	0.218874	0.293895	0.475054	0.149667	0.446107	0.332399	0.772232	0.111073	0.571344	-0.440857	0.242063	0.840164	0.450663	0.235661	0.483492	0.154226	0.100593	0.0486511	0.335527	0.127157	0.429304
chr1_34119206_34171280	0.0672302	0.134576	-0.00171027	-0.219037	0.111129	-0.590998	-0.00770839	-0.15738	0.212026	0.0363947	-0.706792	-0.223417	0.0584179	0.0381609	0.0484501	-0.37082	-0.16224	-0.210809	0.198263	0.163297	0.0376638	0.420277	-0.420695	0.600614	0.240279	-0.0559929	-0.259622	-0.321601	0.14731	0.222863	-0.515395	0.145117	-0.407344	-0.196026	0.401956	0.00661831	-0.135044	-0.333198	-0.353697	0.146043	-0.0796465	0.0627203	0.25523	0.203714	0.0205246	0.0443648	-0.0697869	-0.168167	0.0430251
chr1_34171280_34221481	0.20454	0.243554	0.66707	0.0413428	0.136157	0.808341	0.0839862	0.0290017	0.242294	0.189219	0.38256	0.299631	0.432768	0.488838	0.271506	-0.596392	0.425054	-0.2028	0.288748	0.309938	0.0477312	0.0302735	-0.139535	0.350737	0.558136	0.658603	0.501738	0.647086	0.545234	0.597859	0.232841	0.345301	0.343945	0.215638	0.662281	0.0398991	0.0745185	-0.175474	0.276806	0.286597	0.445842	0.351004	0.360813	0.469742	0.0605321	0.261523	0.530574	0.409947	0.0447772
chr1_34221481_34271890	0.338047	0.492361	-0.663536	-0.183331	0.41952	0.145241	0.162694	0.193973	0.294738	0.113413	-0.570149	0.466756	0.356838	0.207792	-0.0540667	-0.347378	0.66466	-0.156702	0.569367	0.359489	0.126935	0.262224	0.070425	0.562245	0.660688	0.398499	-0.0286511	-0.55118	0.462479	0.0299428	0.250494	0.390678	0.324601	0.296217	0.633221	0.0427863	0.00994008	0.0674078	0.103436	-0.250629	0.0533199	0.508417	0.357845	-0.71815	0.267231	0.125915	0.355066	0.209529	-0.345542
chr1_34271890_34324860	-0.184349	-0.234004	0.301194	-0.417142	-0.00841995	0.132156	-0.367459	0.0670784	-0.119745	-0.366547	-0.364164	0.335521	0.216794	-0.123592	0.00274642	-0.864252	0.0910432	0.0843601	0.0230546	0.192933	-0.455755	-0.176893	-0.319049	0.514532	0.446409	-0.257786	-0.101325	-0.143104	-0.0646761	0.0446359	-0.100005	0.00247965	0.170244	-0.00827107	0.169591	0.0518775	-0.301679	-0.664666	-0.150033	-0.193884	0.150736	0.0216164	-0.106371	-0.178679	-0.176614	-0.138107	0.173718	-0.590453	-0.290725
chr1_34324860_34375598	0.166704	-0.36533	-0.0165484	-0.270993	0.160689	0.359144	-0.00453098	0.0706305	0.0344991	0.16305	-0.239058	0.216298	0.134837	0.0627907	0.161351	-0.662954	0.268285	-0.660675	0.141849	0.214224	0.21554	-0.0146608	-0.621732	0.446212	0.216701	0.236391	-0.279485	-0.850921	0.161101	0.454204	0.455441	0.220136	0.150501	0.252827	0.45663	-0.0341426	-0.137923	-0.624678	-0.15041	-0.411621	0.266988	0.243096	0.251303	0.17075	-0.0950142	-0.102036	-0.0536683	-0.0109863	0.362171
chr1_34375598_34425603	0.174691	0.47143	-0.823975	-0.189824	0.570814	0.432192	0.178289	-0.326076	0.329167	-0.15895	-0.112124	0.366594	0.351561	0.215889	0.254694	-0.975087	0.352914	-0.428342	0.437341	0.547953	0.25338	0.223308	-0.480824	0.378559	0.376926	0.290504	-0.0922332	-0.166095	0.375971	0.467324	0.51769	0.362515	0.509505	0.454694	0.690772	-0.126168	-0.156591	-0.114358	0.505641	-0.39703	0.2374	0.355422	0.396942	0.219391	0.265767	0.156202	0.163285	0.40171	0.00136045
chr1_34425603_34475637	0.293993	0.459994	-0.582472	0.0144632	0.20132	-0.22497	0.0181579	0.402137	0.285038	0.0905819	-0.175624	0.539584	0.268569	0.239925	-0.270256	-0.895096	-0.0073598	-0.309256	0.214044	0.436719	0.446772	0.0284747	-0.0698648	0.5649	0.385955	0.265712	-0.179366	-0.329434	0.311607	0.392001	0.320181	0.31387	0.47449	0.203098	0.578139	0.229323	-0.11994	-0.0119578	0.0112888	0.119116	-0.0206922	0.367807	0.294519	-0.623575	0.3912	-0.00134347	0.197618	-0.0305459	0.0990072
chr1_34475637_34525712	0.330265	0.10948	-1.10984	-0.264885	0.555491	-0.0497814	-0.0378266	0.0676402	0.2507	-0.199053	0.0297016	0.169197	0.509475	0.145513	0.151392	-0.756211	0.55152	0.105074	0.26734	0.281877	0.543446	0.221722	-0.376415	0.304118	0.48825	0.236839	0.0182906	0.212303	0.374783	0.0689079	0.711279	0.345696	0.540857	0.46213	0.636571	0.191754	0.126712	-0.204293	0.264355	-0.150706	0.148414	0.280401	0.490083	-0.102208	0.180346	0.139028	0.19135	0.319474	-0.0288671
chr1_34525712_34580702	-0.0264955	0.20802	0.363781	-0.0725733	-0.197953	0.150379	0.208532	0.133553	0.111995	-0.168888	0.236484	0.0254693	0.0936206	-0.195545	0.0434508	-0.223932	0.038635	0.0115536	0.00183573	0.058393	-0.647046	-0.175412	-0.641871	0.149087	0.209025	0.0837666	0.204965	0.999517	0.249866	0.103288	-0.0114347	0.047706	0.282618	0.457832	0.411592	0.0765215	-0.165465	-0.27951	0.16895	0.399726	0.226107	0.27117	-0.0784966	-0.243013	-0.0822182	0.0108602	0.221161	0.160378	0.189755
chr1_34580702_34630847	0.0354626	0.00783419	-0.400228	0.360346	0.261494	0.0634147	-0.00207829	0.640986	-0.223725	-0.213564	-0.663423	0.0757062	-0.245561	-0.0782938	0.32647	0.790262	-0.0797069	-0.052545	-0.0868061	0.311999	-0.457489	-0.245936	0.0713206	0.22008	0.226023	0.231095	0.353506	-0.273968	0.240462	0.169996	-0.0286981	0.0167435	0.291362	0.105374	0.419021	-0.093081	0.499889	0.794023	-0.0829861	0.0641814	0.243842	0.223195	0.213797	0.103008	-0.346529	0.0466151	0.0294518	0.278365	-0.344829
chr1_34630847_34680892	-0.0991331	0.041853	-0.495404	-0.0767893	0.185339	0.295286	-0.164839	0.045147	-0.0329299	0.110459	-0.683734	-0.033424	0.0176681	0.150173	0.081187	0.261612	0.253941	-0.0908811	0.290659	0.336106	0.310707	-0.178035	-0.0764218	0.339156	0.252736	-0.172417	-0.20971	-0.395825	0.0943641	0.233664	0.63174	0.142214	-0.0724142	-0.214831	0.508816	-0.00231401	0.459305	0.421287	-0.0381023	0.283529	-0.101782	0.124105	0.132812	0.0517637	-0.308881	-0.172601	0.0631192	0.085654	0.046935
chr1_34680892_34734559	0.107565	0.549959	0.166982	0.160558	0.0225241	0.280211	0.195964	-0.0443979	0.023907	-0.293535	0.09142	-0.0700432	0.187434	0.00512071	0.00764987	-0.145301	0.136216	-0.0966723	0.232305	0.00721141	-0.611868	-0.142785	-0.26228	0.3023	0.21464	0.166604	0.209707	-0.194607	0.288035	0.310233	-0.170653	0.0592416	0.226549	0.188142	0.59954	-0.00232435	-0.014128	0.26541	-0.221973	-0.244872	-0.0182343	0.198648	0.11051	0.417509	-0.241032	0.134392	0.20919	0.135386	0.129078
chr1_34734559_34784770	0.464947	0.52345	0.699362	0.4336	0.538143	-0.161079	0.410365	-0.0706245	0.449474	0.577031	0.0478663	0.504091	0.445664	0.32561	0.239523	-0.621744	-0.0693392	-0.174366	0.316026	0.326786	0.138274	0.499418	-0.216531	0.439535	0.551955	0.0843773	0.283838	0.346715	0.392162	0.839081	0.55431	0.278379	0.38891	0.59289	0.706264	0.123865	-0.113148	-0.18634	0.152648	0.06907	0.283328	0.321897	0.623039	-0.229794	0.150784	0.269043	0.574685	-0.350897	0.132054
chr1_34784770_34834927	0.448103	0.357701	0.161893	-0.0767497	0.313253	0.728486	0.0704372	0.213985	0.0988838	0.46762	-0.364123	0.412634	0.436711	0.151134	0.313715	-0.793969	0.156352	-0.327317	0.480508	-0.101798	0.261691	0.265879	-0.135719	0.485616	0.466217	0.235205	0.195582	-0.487437	0.210062	0.512286	0.278606	0.323345	0.315197	0.429948	0.658779	-0.0137142	0.361569	-0.633281	0.00945646	0.120435	0.233036	0.447506	0.460477	-0.768546	0.201659	0.324123	0.281383	0.633267	0.51241
chr1_34834927_34885084	0.260678	0.00064931	0.0768907	-0.0294119	0.199163	0.0295338	0.102833	0.373932	0.19483	0.212833	0.388671	0.404918	0.498359	0.145706	0.349175	-0.0497176	0.157968	0.220258	0.246621	0.258406	-0.0892034	0.356928	-0.440439	0.175747	0.476064	0.602215	0.19932	0.322767	0.291278	0.322858	0.480566	0.243261	0.453017	0.397842	0.478728	0.217462	0.563177	-0.0194416	0.127765	0.48526	0.393679	0.389214	0.282736	-0.213642	0.101072	0.0940524	0.186359	-0.0161013	0.151222
chr1_34885084_34935113	0.101275	0.168221	-0.227168	-0.378978	0.398416	-0.0067855	0.0770033	0.154981	0.153074	0.0902418	-0.797749	0.185371	0.438837	0.367339	0.266696	-0.614839	0.136969	-0.648921	0.41478	0.090341	0.293336	-0.200111	-1.14644	0.472084	0.470017	0.00353346	-0.57812	-0.15077	0.503481	0.59157	-0.173976	0.336715	0.286235	0.0160575	0.497574	-0.0223136	-0.0787466	-0.787469	0.217276	-0.194919	0.229374	0.308662	0.27003	-0.152082	0.0363507	-0.149389	0.101486	0.110628	-0.253359
chr1_34935113_34985306	0.142787	-0.118576	-0.692502	-0.453775	-0.0348229	0.225142	-0.0231442	-0.0671425	-0.0991293	-0.118716	-0.254387	-0.102048	-0.168614	0.182844	-0.0420477	-0.488478	-0.0183347	-0.125634	0.107199	0.0257751	-0.565633	0.277038	-0.211532	0.224053	0.0878107	-0.0660862	-0.0475434	-0.17428	0.16461	0.22574	-1.20238	-0.265756	-0.200413	0.0015804	0.289245	-0.183351	0.166449	-0.227153	-0.375237	0.0234184	0.0582825	-0.00278912	0.179993	0.190097	0.0543656	0.00543246	0.0297743	-0.226688	-0.0553292
chr1_34985306_35040566	0.0565228	0.26476	-0.147026	-0.0695313	0.0385261	-0.221634	-0.161304	-0.0501364	0.00424784	-0.566837	-0.537827	0.0853292	0.123074	0.203407	-0.218317	-0.459631	0.0823283	0.0783264	0.167092	0.270638	0.134537	0.11472	-0.466532	0.178001	0.204192	-0.162285	-0.076206	-0.145127	0.132407	0.347896	0.0513739	-0.083463	0.197061	0.279046	0.352152	-0.0289268	-0.318146	-0.1014	-0.0994908	-0.28095	-0.202161	0.232859	0.089874	-0.328919	0.219017	-0.0677747	0.32079	-0.0239992	0.132838
chr1_35040566_35090655	0.178654	0.193654	-0.269225	-0.27719	0.36269	-0.26466	0.0280649	0.451768	0.341236	0.470962	-0.349084	0.193185	0.162383	-0.114874	-0.00515334	-1.48101	-0.172826	-0.180414	-0.0611349	0.304434	0.175742	-0.397108	-0.0864713	0.423971	0.340829	0.333217	-0.214347	0.189964	0.37193	0.455483	0.284372	0.261241	-0.151958	0.129448	0.497305	0.0736904	-0.0880927	0.439445	0.0513506	-0.419125	0.397461	0.254693	0.366597	0.104778	0.387381	0.0494067	-0.032309	-0.0140444	0.191179
chr1_35090655_35141736	-0.10927	0.086638	0.181943	-0.426322	0.367228	-0.167505	-0.18557	0.22149	-0.0260573	-0.4617	0.30689	-0.489629	0.115239	-0.0649414	-0.176225	0.000494836	0.0444602	0.179848	-0.134416	-0.0433731	-0.571947	-0.017718	-0.931333	-0.0109143	0.233027	-0.0694984	-0.0534606	0.36814	-0.0808117	0.172658	0.168595	-0.0250061	-0.00958251	0.0821534	0.416867	-0.163837	0.0317705	-0.216291	0.169732	-0.255316	0.10599	0.110411	-0.0964679	0.216833	0.103051	-0.578666	0.113536	0.00764317	0.0829551
chr1_35141736_35191807	0.448193	0.19049	0.0639371	-0.523574	0.351428	0.117412	0.224347	-0.186247	0.172938	-0.116961	-0.413479	0.333381	0.437052	0.0987749	0.168343	-0.908648	0.485362	-0.683618	0.195324	0.373582	0.614577	-0.205315	-0.565752	0.485636	0.353891	0.393962	-0.151867	0.068676	0.400654	0.493974	0.519701	0.146518	0.31537	0.421564	0.476087	0.465092	0.0989144	-0.540366	0.228639	-0.319243	-0.0883263	0.278568	0.434034	-0.0340586	0.433979	-0.0941628	0.0111539	-0.0445525	-0.0317194
chr1_35191807_35241921	0.337242	0.256289	0.264672	-0.00818475	0.384195	-0.581559	0.287852	0.106519	0.330906	-0.173537	-0.0158906	0.23994	0.0959204	-0.0868956	-0.014564	-1.26174	0.0694112	0.00668633	0.117713	0.335654	0.525438	0.111809	-0.291663	0.469085	0.412453	-0.0169111	-0.343515	-0.370065	0.1343	0.714863	0.296434	0.424498	0.106701	0.22141	0.614047	0.570079	-0.250794	-0.469402	0.0562052	-0.317537	0.157206	0.349129	0.123505	-0.271678	0.231095	-0.193875	0.0212481	0.00139343	0.282262
chr1_35241921_35291993	-0.0220064	0.271669	0.587884	0.901637	-0.07411	0.0783979	0.0147898	0.0121811	-0.136526	0.664718	1.25178	0.0303888	0.189835	0.106679	0.466979	1.23609	0.803577	1.00619	-0.00519244	0.550726	0.252986	0.58442	-0.105944	0.621546	0.283061	0.0586549	0.417892	0.506372	0.252527	0.353157	0.180032	-0.125265	0.0425064	0.10007	0.634295	-0.0540127	1.46244	0.550748	-0.0219328	1.45617	0.227116	0.069182	0.16205	-0.699392	0.144982	0.260508	-0.408674	-0.109315	-0.187981
chr1_35291993_35342112	-0.0688366	0.111883	-0.517696	-0.0265144	-0.200487	-0.480043	-0.355349	-0.264379	-0.430582	0.628332	-0.187884	-0.0941812	-0.316223	-0.0849225	-0.118184	-0.466058	-0.0147366	-0.929414	0.0774282	0.258468	-0.0926651	0.0495872	-0.584672	0.101655	-0.127568	-0.097926	-0.279135	-0.603368	0.33121	-0.0207486	0.0443824	-0.163389	0.0471484	-0.0906579	0.161561	-0.502426	0.195787	-0.0396829	-0.0897148	-0.0652445	-0.549695	-0.0697955	-0.134375	0.172538	-0.148462	-0.258318	-0.0466478	-0.749565	0.0655069
chr1_35342112_35392385	-0.0631299	0.343856	0.90178	0.588038	0.0273434	0.761382	-0.0915297	0.157025	0.0595771	0.437945	0.868568	0.0910485	0.301662	0.219137	0.477017	1.35046	0.595932	0.826187	0.31541	0.883396	-0.0955463	0.642017	0.209631	0.615338	0.451708	0.288283	0.36677	0.828162	0.323796	0.314356	0.564308	0.112769	0.408744	0.0669374	0.728049	0.0398442	1.14288	0.666937	0.00471969	0.851316	0.0637267	0.303371	0.140005	0.313436	-0.395845	0.424313	0.487821	0.0916173	0.088209
chr1_35392385_35445137	-0.177647	-0.0443556	0.801876	1.27395	-0.350162	0.725585	-0.286246	0.519872	-0.36888	1.10509	0.751409	-0.168993	-0.0128761	0.162458	0.224731	2.05269	0.322741	0.71484	0.266945	1.09417	0.339876	0.515311	0.547996	0.330841	-0.213752	-0.0990758	-0.185725	0.113549	-0.273763	0.000520517	0.267457	0.0376882	-0.467461	0.0554598	0.425617	-0.460467	1.24528	1.61361	0.163542	0.997956	-0.0796892	-0.1866	-0.245893	0.633463	-0.190383	0.472054	0.279692	0.254834	-0.0481068
chr1_35445137_35495776	-0.276891	-0.173757	0.244702	0.826975	-0.302541	0.0961631	-0.516234	0.257821	-0.233264	0.314271	0.0314542	-0.0463442	-0.17888	-0.19295	-0.0655857	1.40118	-0.777497	0.65149	-0.0374152	0.290596	0.00441293	0.169917	-0.0831553	-0.260353	-0.560637	-0.146169	0.00925847	0.217847	0.0164794	-0.454877	-0.306306	-0.160019	-0.496562	-0.456152	0.264132	-0.33178	0.359345	1.23132	-0.283527	0.224298	0.373206	-0.112983	-0.461211	-0.375702	-0.120977	0.0512922	0.0543679	0.382049	-0.314712
chr1_35495776_35547434	-0.414832	-0.204134	-0.855386	0.205922	-0.147706	0.177554	-0.463547	0.00461954	-0.36558	0.0573037	-0.141322	-0.271031	-0.5636	-0.348584	-0.364033	1.10311	-0.456963	-0.114724	-0.0953948	0.17544	-0.863353	0.080394	0.126711	0.015207	-0.730795	0.098854	-0.421713	-0.49313	-0.544624	-0.473886	-0.471416	-0.421308	-0.34483	-0.401617	0.169256	-0.0415106	0.108929	0.673757	-0.22542	-0.738872	-0.384045	-0.369997	-0.849957	-0.231267	-0.244748	-0.257559	-0.301346	-0.326113	-0.485475
chr1_35547434_35598155	-0.675566	-0.864001	-0.259615	-0.725212	-0.708971	-0.722872	-0.999226	0.00642419	-0.698737	-0.505493	-0.127824	-1.23813	-0.769684	-0.575993	-0.769474	-0.071065	-0.579207	-0.804745	-0.496106	-0.343299	-0.955692	-0.49756	-0.103293	-0.578853	-0.878247	-0.490744	-0.657573	-1.69972	-1.08193	-1.17303	-0.82817	-0.591699	-0.628263	-1.07199	-0.421427	-0.672233	-0.312365	-0.656011	-0.685368	-0.575232	-1.08938	-0.634545	-1.06597	-0.526619	-0.727733	-0.558049	-0.388156	-0.44177	-0.767174
chr1_35598155_35649377	-0.742864	-0.0693379	-0.54794	-0.0504188	-0.928836	-0.216874	-0.921981	-0.796659	-0.673812	-0.852841	-0.797781	-0.698095	-1.13612	-1.10757	-0.497929	-0.0152129	-1.15216	-1.24851	-0.606035	-0.194608	-0.408655	-0.763956	-0.518165	-0.424632	-1.07974	-0.433997	-0.78015	-0.920397	-0.573866	-0.40599	-0.284019	-0.569578	-0.888788	-0.833561	-0.294436	-0.585125	-0.786031	0.0612012	-0.933642	-1.08436	-0.587316	-0.746352	-0.808969	-0.487708	-0.699013	-0.532118	-0.494742	-0.570506	-0.428792
chr1_35649377_35699845	-0.186773	-0.0449245	-0.415528	0.798464	-0.1741	0.170177	-0.38342	0.242064	-0.563661	0.385279	0.138632	-0.182859	-0.0697967	0.201207	0.0333567	1.05269	-0.0256243	0.488348	-0.0724145	0.548142	-0.346052	0.0471034	0.0372923	0.274957	-0.337827	0.298831	0.323535	0.173466	0.0716116	-0.295347	0.441459	-0.255354	-0.164591	-0.103717	0.0876727	-0.358748	0.917037	1.07511	-0.600303	0.52912	-0.144783	-0.154965	-0.181356	0.537079	-0.0390023	-0.0485804	-0.19177	-0.235805	-0.080449
chr1_35699845_35750714	-0.159482	-0.121811	0.348599	0.63989	-0.332356	0.973739	-0.26749	0.262651	-0.176921	0.652492	0.746742	-0.100887	0.0809632	0.270704	0.153529	1.76006	0.419384	0.397945	0.110132	0.693535	0.0193366	0.103218	0.373664	0.473908	-0.282624	-0.0765106	0.188911	0.232912	-0.184697	-0.347048	0.468228	-0.182277	0.1519	-0.0730202	0.233197	0.147394	0.64434	1.03813	-0.0127929	0.473587	-0.0947267	-0.0778204	0.0661231	-0.0192166	0.0717406	-0.156936	-0.191957	-0.0317254	-0.270648
chr1_35750714_35800982	-0.480238	0.0119143	-0.210063	-0.442071	-0.324992	0.184557	-0.570573	-0.216212	-0.497574	-0.259496	-0.648262	-0.393445	-0.403147	-0.353266	-0.434463	0.326248	-0.193223	-0.274589	-0.44755	-0.0815726	-0.101572	-0.20523	0.12507	-0.349527	-0.637933	-0.0294383	-0.541436	-0.785409	-0.637722	-0.496129	-0.776897	-0.288458	-0.274332	-0.404651	0.152693	-0.506834	0.0695634	0.00446657	-0.770556	-0.338079	-0.201839	-0.463095	-1.2756	-0.269402	-0.199998	-0.178817	-0.431155	-0.670002	-0.359354
chr1_35800982_35851179	0.0114	-0.254539	-0.20462	0.0700374	-0.258451	0.218838	-0.357859	-0.341361	-0.143943	-0.0220913	-0.0497265	-0.141148	-0.11306	-0.144033	0.00219549	0.0593799	-0.516784	-0.314821	-0.320177	0.248152	-0.104923	-0.342605	0.266824	-0.323903	-0.46616	-0.215099	0.247746	0.00248331	-0.0940378	-0.524648	-0.142138	0.0744033	0.357975	0.280984	0.301631	-0.313184	-0.0954893	-0.0576202	-0.267972	0.730557	-0.338737	-0.216431	-0.334374	-0.21224	0.0497525	0.155696	-0.0688867	-0.467494	-0.480018
chr1_35851179_35901697	-0.0374071	-0.335649	0.766416	-0.0173254	-0.224664	0.0616781	-0.428128	0.00784126	-0.192263	-0.056351	0.528603	-0.255738	-0.0171247	-0.141717	-0.335981	-0.709214	-0.431141	0.516711	-0.251892	-0.109805	-0.10498	0.0835522	-0.0123248	-0.10864	-0.417688	0.121924	-0.267037	0.240453	-0.0025772	-0.325926	-0.0417403	-0.451978	-0.121835	-0.299174	0.0880658	-0.424813	-0.266793	-0.0303001	-0.325774	-0.293449	-0.30582	-0.502592	-0.169745	-0.395215	-0.0996094	-0.296816	-0.206763	-0.157835	-0.211936
chr1_35901697_35952158	-0.12887	-0.799951	-0.921755	-0.134154	-0.324681	-0.594108	-0.283442	-0.807004	-0.219005	-0.782532	-0.737671	-0.545364	0.0744674	-0.280334	-0.484657	-0.207802	-1.15102	-0.860014	-0.166943	-0.235035	-0.109644	-0.239583	-0.361191	-0.257867	-0.296898	-0.263829	-0.209327	-0.88415	-0.220184	-0.0612506	-0.417506	-0.12752	-0.276793	-0.581789	0.0332091	-0.386171	-0.313899	-0.159153	-1.01133	-0.562994	-0.397491	-0.124865	-0.147521	-0.449998	-0.181396	-0.310346	-0.39323	-0.640557	-0.059166
chr1_35952158_36002465	-0.237027	-0.0870924	0.373951	0.00569579	-0.0920861	-0.366248	-0.237938	0.309073	-0.112399	-0.0398406	-0.655756	-0.284081	-0.0140013	-0.110372	-0.283939	-0.012442	0.261254	-0.0131392	-0.168393	0.307547	-0.275872	-0.0540328	-0.500783	-0.437546	-0.440329	-0.399353	-0.345681	-0.426283	-0.482306	0.0139056	0.0372844	-0.114034	-0.10797	0.120689	0.260937	0.0146261	-0.000996071	-0.225709	-0.381698	-0.411566	-0.777051	-0.14293	-0.180511	0.0091751	-0.252675	-0.433814	-0.369134	-0.0683478	0.263621
chr1_36002465_36052591	0.137947	0.756065	0.727548	1.81596	0.174768	1.23169	0.302238	0.534815	-0.20202	1.66557	1.25413	0.223212	0.434313	0.942469	0.67773	2.52179	0.992917	1.29749	0.711648	1.79352	0.0504327	1.13845	1.55891	1.14226	0.522802	0.768637	0.724115	1.17189	0.513392	0.240067	0.854018	0.486672	0.509424	0.160427	1.00745	-0.112943	2.0805	1.62357	0.181451	1.85892	0.550514	0.296988	0.0918776	0.365822	0.264268	0.649859	0.517071	-0.22975	0.420927
chr1_36052591_36102789	0.201575	0.113485	0.596839	0.271495	0.0541785	-0.105795	-0.00257584	-0.154031	0.207055	-0.376287	0.694893	0.185705	0.363294	0.192208	0.421032	0.225339	-0.156694	0.873458	0.0551889	0.227516	0.304273	0.18392	-0.239266	0.282308	0.0691668	0.304335	0.528236	0.81215	0.131342	0.0266751	-0.0360005	0.140194	0.0250966	0.0266789	0.574542	0.0864745	0.320693	0.222716	-0.267725	-0.308791	-0.0399791	0.150064	-0.157471	0.272765	0.333001	0.126015	0.20926	0.355251	0.341616
chr1_36102789_36153079	-0.43428	-0.0969145	-0.131229	-0.346837	0.0102691	-0.259911	-0.496356	-0.312191	-0.0950271	-0.109819	-0.335051	-0.205281	-0.140722	-0.175668	-0.306071	-0.383383	-0.422919	-1.07533	-0.200701	0.0821176	-0.520496	-0.499514	-0.758988	-0.00563182	-0.608599	-0.189781	-0.279432	-0.464833	-0.388956	-0.168547	0.153316	-0.341159	-0.128144	-0.158934	0.0972533	-0.147054	-0.164372	-0.209853	0.00874613	-0.789615	0.169225	-0.175559	-0.0705569	-0.104154	-0.145237	-0.115677	-0.584025	-0.290927	-0.292869
chr1_36153079_36203298	-0.248012	-0.428464	-0.273982	-0.140188	-0.601438	0.0814361	-0.276547	0.141271	-0.216128	0.140099	-0.504088	0.000870161	-0.387461	-0.261493	-0.205762	0.360977	-0.584573	-0.826166	-0.133586	0.192974	-0.0896253	-0.0916851	-0.188781	0.0220402	-0.652851	-0.126751	-0.833625	-0.482831	-0.16869	-0.0639471	0.512197	-0.107762	-0.297523	-0.436788	0.13949	-0.107147	-0.550161	0.186554	-0.285556	-0.644701	-0.319888	-0.175379	-0.237393	-0.296491	-0.35123	-0.25102	-0.13651	-0.20777	-0.519292
chr1_36203298_36253634	-0.252561	0.0273726	0.13686	0.236138	-0.12884	-0.00168476	-0.543092	0.0552726	-0.317185	0.530253	0.203025	-0.0911543	-0.405969	-0.272404	-0.196178	0.833896	-0.341466	0.482802	-0.0094436	0.61482	-0.0573036	0.12375	0.40436	-0.131017	-0.546946	-0.179543	-0.0639139	0.742051	-0.000293672	-0.299893	-0.118246	0.0277232	-0.0344436	-0.07933	0.280288	-0.090258	0.765411	0.717498	-0.684726	0.17827	-0.305852	-0.240027	-0.434722	-0.061722	-0.25843	0.00841932	-0.301403	0.180743	-0.207728
chr1_36253634_36304252	-0.442796	-0.214877	0.1409	-0.0901652	-0.67148	-0.00961498	-0.710598	0.00926276	-0.376789	-0.0905956	-0.522122	-0.224981	-0.262897	-0.410685	-0.247312	0.408918	-0.417492	-0.0788227	-0.29383	0.0951703	-0.0599936	-1.10903	0.337457	-0.520053	-0.844923	-0.135993	-0.485547	-0.299308	-0.697529	-0.367908	0.179733	-0.334072	-0.21131	-0.257454	0.132416	-0.236876	-0.0825954	0.60651	-0.498185	-0.354651	-0.342104	-0.0949279	-0.53961	-0.21405	-0.0629162	-0.163943	-0.626335	-0.295603	-0.516137
chr1_36304252_36354506	-0.0365173	-0.0730694	0.215919	0.596734	-0.0341898	0.329281	-0.274056	0.104062	-0.287329	0.00584941	0.214577	-0.310136	-0.210452	-0.0988156	-0.0888686	1.08508	0.138432	0.108782	-0.190936	0.18031	-0.548376	-0.0419752	-0.200583	-0.0550452	-0.381956	-0.167401	-0.0190935	-0.0204679	0.0513958	-0.433414	0.0121751	-0.094522	-0.0689039	-0.342095	0.249529	-0.227407	0.610134	0.263002	-0.412527	0.616818	-0.0204903	-0.160938	-0.182	0.138976	-0.00410551	-0.192315	-0.50181	-0.380748	0.0118448
chr1_36354506_36404881	0.140676	0.0890738	0.668165	0.583053	0.100605	0.478708	-0.0155498	0.486741	0.156691	0.498971	0.303635	-0.351444	-0.0812319	0.165065	0.0946684	1.67553	0.220387	0.146188	-0.0126597	0.798159	-0.00616079	0.217909	0.285005	0.349916	0.205401	0.252298	-0.0721642	0.598056	0.0571639	-0.0790171	-0.22119	0.0949801	0.109646	-0.150689	0.391714	-0.315237	0.844567	1.11312	-0.0689166	0.113676	-0.426902	0.0161855	-0.0171813	0.0753219	0.024064	0.250789	-0.697753	0.484088	0.0471428
chr1_36404881_36455201	-0.0350443	0.373485	-0.200087	0.574745	0.331042	-0.0953489	-0.0543491	0.285339	0.0397163	-0.524915	-0.203121	-0.0251741	-0.0443589	-0.17913	0.0231871	0.910274	0.559795	0.128262	0.0271126	0.835955	-0.113552	-0.67656	0.27044	-0.208513	-0.0350323	-0.0295093	0.215587	0.356958	0.302168	-0.361012	0.0831508	-0.0287782	0.500486	0.329776	0.580591	0.055451	0.320512	0.462943	0.103817	-0.428668	0.0406568	-0.18165	-0.00876062	0.171426	0.415863	0.0714432	-0.0806854	0.336172	-0.246261
chr1_36455201_36505905	-0.220553	-0.379473	0.715115	0.229739	0.103793	-0.773713	-0.294971	0.011824	0.0315615	0.158626	-0.0564708	-0.309922	-0.1379	0.0501302	-0.138417	0.799665	-0.619039	-0.186199	-0.136747	0.0130648	-0.220373	-0.590948	-0.052997	-0.0315608	-0.597832	-0.210806	-0.0929627	-0.248209	-0.288683	-0.526141	-0.372467	-0.16131	0.101786	-0.034822	0.270871	0.0416952	0.0180712	0.254382	-0.497929	-0.367343	0.368609	-0.164076	-0.262392	0.333211	-0.27151	-0.0541706	-0.208465	0.295889	-0.223228
chr1_36505905_36556111	-0.456208	-0.149394	0.269153	0.65421	-0.159861	0.250047	-0.190066	-0.216661	-0.43196	0.399638	0.266177	-0.310151	-0.174624	-0.0237668	0.326746	1.13811	-0.304769	0.898636	-0.407931	0.273472	-0.474452	0.386994	0.122304	-0.0924838	-0.695224	-0.0633801	-0.0788177	0.332246	-0.374948	-0.634147	0.233921	-0.0626058	-0.130562	-0.519022	0.0188311	-0.471682	0.852389	0.883142	-0.262735	0.41452	-0.120105	-0.284351	-0.620138	-0.373233	-0.166922	-0.298021	-0.459756	-0.397502	-0.197384
chr1_36556111_36606287	0.217318	0.241628	-0.449137	-0.326228	0.162729	-0.0826856	-0.114666	0.218161	-0.014911	0.320102	-0.362207	0.163979	-0.143903	-0.0730925	-0.229546	-0.04034	-0.843397	-0.664998	0.0729538	0.422685	0.201403	-0.386116	-0.218907	0.0820597	-0.139641	0.228037	-0.36479	-0.578772	0.31807	0.237993	0.467718	-0.0183114	-0.0799751	0.200112	0.271463	0.328345	-0.608616	0.149239	-0.0287074	-0.753989	-0.0363206	0.157536	0.0732318	0.0966793	0.147829	-0.0708049	-0.205645	-0.221374	0.0225793
chr1_36606287_36656699	0.0293865	0.0333568	-0.0274782	0.554946	-0.0388328	0.878326	-0.14917	0.583556	-0.154702	0.916957	-0.283274	-0.290252	-0.144206	0.473635	-0.0449995	1.12707	0.42759	-0.0396851	0.0420052	1.03911	-0.255413	0.200798	0.284624	0.223567	-0.289999	-0.0341621	-0.122228	-0.0760478	-0.0954249	-0.184087	0.367128	0.178931	-0.220153	-0.0988009	0.536275	0.0474641	0.516225	0.996827	0.0405977	0.175539	0.00742638	0.118487	0.11627	0.100808	0.317207	0.33803	-0.173411	0.112343	-0.203138
chr1_36656699_36707171	-0.560459	-1.00269	-0.215228	-0.000291887	-0.907222	-1.21527	-0.988999	-0.147251	-0.721499	-0.426044	-0.714159	-0.643963	-0.885848	-0.503995	-0.469286	0.261254	-1.36525	-0.283121	-0.550202	-0.204592	-1.10391	-0.316022	-0.667061	-0.439629	-0.993331	-0.347067	-0.610956	-0.248439	-0.829661	-0.948409	-0.384758	-0.699919	-0.568088	-0.598559	-0.213243	-0.43299	-0.381162	0.0244313	-0.687726	-0.369581	-0.436966	-0.642568	-0.717072	-0.34073	-0.717091	-0.694713	-0.508787	-0.709184	-0.507281
chr1_36707171_36757990	-0.192237	-0.724959	-2.51254	0.227461	-0.223894	-0.0106099	-0.289941	-0.0974992	-0.364245	-0.0257654	-0.273557	-0.144959	-0.634194	-0.24243	-0.246307	-0.252626	-0.0610692	-0.412895	-0.378391	-0.0761457	-0.697144	-0.692017	-0.122611	-0.336176	-0.80287	-0.135137	-0.235035	-0.47648	-0.325244	-0.404589	0.180389	-0.133053	-0.290528	-0.408518	0.179057	-0.147611	0.120617	-0.0072985	-0.562024	-0.187701	-0.418577	-0.258212	-0.385479	0.0229023	0.0193847	-0.162275	-0.626106	-0.294178	0.0553092
chr1_36757990_36808283	-0.129941	0.194394	-0.543243	0.778339	-0.165366	0.612676	-0.176843	-0.108486	-0.269535	0.168314	-0.114587	-0.0504873	-0.234104	-0.0653386	0.0171331	0.997206	-0.153889	-0.0505405	-0.0549823	0.506975	-0.316318	-0.344282	0.418099	0.385362	-0.303155	0.0193641	-0.100739	-0.226715	-0.262278	-0.11552	0.21626	-0.150069	0.127959	-0.24149	0.550052	-0.0680719	0.87556	0.251354	0.126258	0.546838	-0.344144	-0.243291	-0.138513	-0.479954	0.0612832	-0.14488	-0.152107	-0.127705	-0.578159
chr1_36808283_36858554	0.239792	-0.0380085	-0.246043	-0.70987	0.052527	0.204571	0.0188795	-0.11138	0.0564075	0.175689	-0.431186	0.248562	-0.117816	-0.0969612	-0.105727	-1.04809	-0.329579	-0.273879	-0.0578686	0.075344	0.0981429	-0.0970869	-0.854997	0.197073	-0.0309791	-0.310732	-0.235717	-0.643881	0.0952455	0.22378	0.0880955	-0.174769	0.286841	0.187899	0.309474	0.323338	-0.404064	-0.381241	0.00884001	-0.299968	-0.0389785	0.156595	0.134021	-0.0523782	0.406368	-0.171453	0.0713835	0.279727	-0.00547254
chr1_36858554_36909136	-0.406216	-0.516795	-0.433106	0.0809886	-0.463363	0.0579321	-0.494497	-0.759539	-0.570856	-1.138	-0.0445307	-0.349579	-0.378696	-0.623585	-0.198996	0.700707	-0.529687	-0.00234957	-0.699538	-0.514191	-0.269411	-0.40708	-0.102568	0.0525738	-0.55052	-0.0636202	0.103414	-0.922032	-0.42285	-0.607553	-0.384065	-0.114595	-0.507607	-0.665955	0.0728369	-0.280922	0.578812	-0.324687	-0.791439	-0.0735899	-0.0386848	-0.478015	-0.453714	-0.61929	-0.505417	-0.274241	-0.450991	-0.395523	-0.284276
chr1_36909136_36959497	-0.0710882	-0.174336	0.0252717	0.223689	0.0650787	-0.700299	-0.173091	-0.453684	0.113408	-0.139971	-0.00300823	-0.129423	0.0390219	-0.293297	-0.422716	-0.622585	0.0758708	-0.0969537	-0.11256	-0.359225	0.346906	-0.259952	-0.366169	0.261578	-0.217077	-0.335757	-0.134173	-0.110315	-0.0588311	-0.116497	-0.125158	-0.12317	-0.0455095	0.12096	0.410448	0.0721282	0.475999	-0.730484	-0.0208904	-0.508748	-0.126347	-0.180438	-0.333635	-0.0572265	-0.00906508	-0.269674	-0.052576	-0.185044	-0.268137
chr1_36959497_37009746	0.207248	-0.0854055	-0.352554	-0.825104	0.0988367	-0.520301	-0.0240983	-0.217061	-0.0377931	0.0537542	-0.437337	0.0430411	-0.116387	-0.519919	-0.0737447	-1.20438	0.105718	-0.603668	-0.137592	-0.0358362	0.492548	-0.358388	-1.21404	0.207133	0.109012	0.166977	-0.13327	-0.338144	0.0546053	0.142401	0.523776	-0.072771	0.191592	0.223317	0.312554	0.0262378	-0.597875	-0.491742	0.038553	-0.470573	0.101615	0.0113023	-0.0367241	0.328238	-0.0827519	-0.111425	-0.223279	0.150715	0.0409133
chr1_37009746_37059904	0.0689934	-0.0551371	-0.442209	-0.609346	-0.271609	-0.94879	-0.132033	-0.463698	-0.144524	0.0336011	-0.200652	0.0332923	0.0902664	-0.434041	-0.301253	-1.39168	-0.415753	-0.325712	0.0132097	-0.14605	-0.148866	-0.0434485	-0.943188	0.0401396	0.0446301	-0.0522733	-0.318639	0.117111	-0.104388	0.218943	-0.252275	-0.238041	0.051381	-0.0972376	0.391881	-0.194627	-0.290055	-0.474874	-0.351179	-0.296391	-0.253594	-0.00461178	0.00921066	0.0928253	-0.440944	-0.592627	-0.0480817	0.0176174	-0.25717
chr1_37059904_37110055	0.28608	0.140695	-0.210979	-0.422817	0.276309	0.121186	-0.178024	-0.4625	0.270086	0.164867	-0.806187	0.323242	0.0726189	0.170147	-0.0154252	-0.991312	0.0797079	-0.34472	0.250252	0.294002	0.0496153	0.210252	-0.172735	0.383267	0.232673	0.171174	-0.0287218	-0.349911	0.196114	0.430992	-0.200658	0.253478	0.229901	0.186972	0.415843	0.0508495	-0.158437	-0.305323	-0.205553	-0.381392	-0.203059	0.327167	0.327081	-0.0347187	-0.0574003	0.0145427	0.103049	-0.173057	0.030885
chr1_37110055_37160529	0.0197961	0.233291	-0.72979	-0.575703	0.530329	-0.480274	0.108324	0.150453	0.0853267	0.20492	-0.212046	0.208214	0.0115025	-0.0514931	0.0893188	-0.54826	-0.0767472	-0.924742	0.334718	0.0217823	-0.435119	-0.051458	-0.493967	0.35663	0.262144	0.0923391	-0.0185722	-0.345497	0.106972	0.513451	0.432317	0.144426	0.123732	0.217954	0.450805	0.049602	-0.341611	-0.175455	0.093927	-0.358488	-0.0173107	0.233488	0.455777	-0.28428	-0.0446227	-0.0208601	0.382754	0.000900855	0.193454
chr1_37160529_37210584	-0.0200009	-0.0138501	-0.544147	-0.70311	-0.0484732	-0.520271	-0.00404126	-0.217063	-0.255771	-0.0189502	-0.18454	0.231691	0.0743078	-0.329579	-0.326433	-0.905489	-0.207145	-0.576578	0.191976	0.348765	0.309846	-0.358325	-0.547533	0.269082	0.169583	-0.0798735	0.0111406	-0.191376	0.238296	0.20749	0.0191397	0.108617	-0.121478	0.0903619	0.298584	-0.0176992	-0.440296	-0.38215	-0.0427165	-0.603641	0.146034	0.278117	-0.00195583	-0.156063	-0.184032	-0.23005	0.265396	-0.0485002	0.142171
chr1_37210584_37261241	0.0388857	0.438649	-0.118151	-0.396618	0.179293	-0.110009	-0.0261195	-0.27569	0.103275	-0.235609	-0.363504	0.105402	-0.0584949	-0.223747	-0.00353017	-0.828571	-0.167734	-0.700802	0.062018	-0.252195	0.00738811	-0.136538	-1.21841	0.337288	0.192495	-0.0625616	0.0708527	-0.403114	-0.000992414	0.440575	0.41871	0.0707467	0.35604	-0.10194	0.379157	0.0546802	-0.578055	-0.385133	-0.567322	-0.357547	-0.174253	0.0783127	0.0477659	0.326526	-0.183553	-0.0872188	-0.249768	-0.220018	-0.282377
chr1_37261241_37311364	0.258744	0.380733	0.13584	-0.70065	0.430341	-0.0980146	0.17762	-0.216511	0.416739	0.251289	-0.203679	0.528055	0.438831	0.265868	0.0883355	-1.01507	0.223842	-0.272148	0.367759	0.299298	-0.146531	-0.0550431	-0.459429	0.420407	0.245189	0.113126	0.143768	-0.316424	0.414921	0.436836	0.335517	0.364279	0.557912	0.343987	0.507201	0.206315	-0.472799	-0.197141	0.167675	-0.346299	0.322452	0.459586	0.571303	0.391565	0.225612	-0.107093	0.153673	0.314779	0.293619
chr1_37311364_37361369	0.177478	0.601852	-0.524462	-0.244035	0.173876	-0.0526417	0.0946017	0.319753	0.277744	0.0572825	-0.437006	0.394638	0.390043	0.0137351	0.0151644	-0.661762	-0.164012	-0.307133	0.293752	0.117857	0.182287	0.0857531	-0.562765	0.442032	0.533517	0.0127716	-0.163397	-0.159431	0.518873	0.33409	0.354062	0.300935	-0.0584029	0.00583615	0.398779	0.208887	-0.56567	-0.786412	0.139138	-0.35782	-0.0944846	0.349395	0.505148	-0.594871	0.0381423	0.142255	0.147033	0.107924	0.151121
chr1_37361369_37411408	0.103158	0.255814	0.16468	-0.337543	0.224449	0.517934	-0.0550913	-0.0884374	0.201302	0.0929348	-0.185511	0.280888	0.210272	0.0854723	0.12571	-0.800263	-0.238629	-0.358905	0.174804	0.327439	0.085342	0.37476	-0.558787	0.266691	0.652105	0.331356	0.130288	-0.820212	0.491945	0.338247	0.0910159	0.25506	0.465503	0.270204	0.456512	0.0531428	-0.0735167	-0.163907	0.0655616	-0.0634164	0.503223	0.282427	0.300747	0.0613467	0.0259793	-0.0546599	-0.151859	0.211139	0.239217
chr1_37411408_37461459	0.438421	0.340385	0.583574	-0.81749	0.747594	0.0892634	0.286795	0.449956	0.12193	-0.378206	0.387458	0.55117	0.630452	0.226095	-0.0595174	-2.50498	-0.106814	0.282173	0.386139	0.129639	-0.200021	-0.253299	-0.827317	0.389399	0.701022	0.125944	-0.0716469	0.784673	0.760153	0.724752	0.214701	0.474941	0.447251	0.254748	0.532434	0.525764	-0.860273	-0.293501	0.273065	-1.14014	0.165542	0.596145	0.649308	0.26698	0.136952	0.120049	0.00944498	0.185319	0.288604
chr1_37461459_37511682	-0.0996856	0.160866	-0.483844	-0.00292516	-0.217048	0.512959	-0.155502	-0.333588	-0.462761	0.468539	-0.745847	0.0753351	-0.269458	-0.0110271	-0.0945063	0.843402	0.627106	-0.559075	0.253901	0.570981	-0.578828	-0.266576	0.0122837	0.364321	0.142116	-0.00438001	-0.267138	-0.592818	-0.0389704	0.104905	-0.133871	0.0428004	-0.0870011	-0.16836	0.203175	-0.327725	0.633591	0.473066	0.0489676	0.136352	-0.0752972	0.205871	0.334832	-0.0934909	-0.606139	0.0236798	0.0729374	-0.341132	-0.0454315
chr1_37511682_37562502	0.122942	0.249101	-0.446844	-0.675095	0.147312	0.105033	-0.0602286	-0.0418301	0.0741498	-0.564902	-0.909074	0.318054	0.0917789	-0.291526	-0.528608	-0.741379	-0.047723	-0.665217	0.355485	0.0982234	-0.149356	-0.101399	-1.12556	0.342297	0.362762	0.163968	-0.553029	-1.16843	0.0381189	0.580753	0.118426	0.144128	0.220848	0.15421	0.238345	-0.198113	-0.455349	-1.32962	-0.0358754	-0.164111	0.110289	0.323963	0.493377	-0.596209	-0.053933	-0.284572	-0.041623	-0.363672	0.126549
chr1_37562502_37612542	0.180234	0.569987	0.62371	-0.116558	0.397582	-0.502695	0.327471	-0.335168	0.235062	-0.188795	0.00287924	0.382484	0.46903	0.352932	0.357358	-0.207932	0.0910355	-0.304244	0.207371	0.429209	0.23167	0.501644	-0.371161	0.685643	0.584399	0.331551	0.284495	-0.0299371	0.542131	0.356672	0.476482	0.302971	0.529916	0.118044	0.688012	0.450658	-0.145875	0.160645	0.248027	0.136358	0.39027	0.46401	0.611993	0.0552855	0.0781831	-0.00748042	0.179497	0.472942	0.335826
chr1_37612542_37663009	0.0493669	0.303484	-0.209587	-0.14522	0.270992	-0.594031	0.0234192	0.366448	0.265384	-0.0135417	0.150241	0.0416601	0.340454	0.0518576	0.0936691	-0.227766	0.431629	-0.078499	0.358967	0.162045	-0.00896688	0.20604	0.038103	0.703241	0.495155	0.347493	0.0857511	-0.455952	0.0733378	0.323995	0.649565	0.288128	0.310069	0.140764	0.556052	0.357259	0.0651691	-0.510819	-0.0859026	0.0262037	0.39959	0.278689	0.3519	-0.369374	-0.0658703	-0.127396	0.462273	0.301672	0.328149
chr1_37663009_37716182	0.0373643	-0.0316358	0.73634	-0.139601	0.270626	-0.0693837	-0.380017	-0.608073	0.0350662	-0.136034	0.396334	-0.0714878	-0.0103121	0.0173138	-0.266517	0.0306148	0.421729	0.434535	-0.0556746	-0.0100881	-0.192699	0.19293	-0.864068	0.282414	0.119886	-0.18989	-0.453291	-0.217987	0.336488	0.238812	0.184389	-0.0211193	-0.254372	-0.0166899	0.143376	-0.378572	-0.15889	0.132245	-0.0304752	-0.522984	-0.35508	-0.135265	0.0481693	0.402532	-0.414941	-0.232744	-0.0177948	0.0966469	0.135903
chr1_37716182_37766209	0.0961285	0.265112	-0.426179	-0.313394	-0.0691548	-0.120536	-0.640988	-0.397743	0.191544	-0.645188	-0.800793	0.126212	0.22238	-0.0813962	-0.295124	-1.26374	-0.225777	-1.09306	-0.0181638	0.0928518	0.14137	-0.882025	-0.629317	0.288117	0.215426	0.221721	-0.454911	-0.578518	0.0293481	0.282058	-0.305964	0.1227	0.164485	-0.0297815	0.271081	-0.160695	-0.41484	-0.712094	0.0905174	-0.800067	0.0330218	0.142864	0.0102302	0.0953256	-0.183133	-0.042315	0.0724561	0.164069	-0.162708
chr1_37766209_37816478	0.168075	0.0500675	-1.17227	-0.421225	0.120004	-1.31974	0.245396	0.357041	0.129397	0.153524	-0.897005	0.177952	0.0886016	0.115616	0.220517	-0.637076	0.172085	-0.572313	0.132422	0.240807	0.380073	-0.177332	-0.715019	0.479556	0.392919	0.0152865	-0.220757	-0.442282	0.469006	0.598493	0.52837	0.247311	0.307273	0.374685	0.50598	-0.26542	-0.447113	-0.870767	0.229534	-0.337707	-0.0859398	0.266172	0.312776	0.084935	-0.155616	-0.108331	0.150831	0.427224	0.128864
chr1_37816478_37867740	-0.377849	0.0253678	-0.678059	-0.62904	-0.191434	-0.0265838	-0.581326	0.056758	-0.320334	-0.161287	-1.22256	-0.542987	-0.499033	-0.0991346	-0.425734	-0.432847	-0.47082	-1.05189	-0.510881	0.112232	-0.592974	-0.396945	-0.659695	-0.0996429	-0.33322	-0.141755	-0.309309	-0.422403	-0.12485	-0.182901	-0.0855622	-0.242029	-0.476513	-0.24396	0.0520273	-0.719602	-0.819157	-0.392405	-0.555753	0.0833858	-0.832991	-0.196499	-0.451694	-0.424272	-0.378797	-0.213904	-0.289888	-0.501416	-0.585041
chr1_37867740_37917961	-0.143548	-0.0423601	-0.193193	-0.110691	0.092183	-0.329324	-0.131094	0.0561823	0.0575872	-0.216438	-0.297121	0.36038	0.110626	-0.432552	-0.138636	-0.584684	0.293839	-0.372893	0.149913	0.349317	-0.047072	-0.0877516	-0.411582	0.465438	-0.160195	-0.0781502	-0.335472	-0.924234	0.0571103	-0.139203	-0.107539	0.0209846	0.0614095	-0.079674	0.800024	-0.214151	0.185374	-0.356908	0.0840232	-0.863725	-0.394255	0.0813155	0.106109	0.252314	-0.0676452	-0.0600217	-0.0592737	-0.36236	0.0778521
chr1_37917961_37968230	-0.102153	-0.131075	0.179779	0.411869	-0.0548748	-0.66472	-0.294012	-0.154528	-0.154361	0.24741	0.151628	-0.112138	-0.194111	-0.260793	-0.0910531	0.494805	0.335787	0.0176167	-0.0135274	0.261482	-0.0970941	0.497191	-0.174343	0.291423	-0.0399113	0.0712799	0.378148	0.410648	-0.229891	-0.218544	0.0434329	-0.0850573	-0.1355	-0.291292	0.393787	0.106201	0.46169	0.321176	-0.487524	0.225408	-0.472665	-0.157098	-0.29227	0.148747	0.302599	-0.279041	-0.20124	0.0652882	-0.196097
chr1_37968230_38018930	-0.251873	-0.206628	0.540663	0.78884	-0.349803	0.795342	-0.211798	0.552721	-0.334379	0.666137	0.519677	-0.37057	-0.527387	0.221318	0.111709	2.01486	0.164584	0.478765	-0.184102	1.21151	-0.592595	0.44854	0.622494	0.119224	-0.647979	0.0959791	-0.0117163	0.456491	-0.609955	-0.565483	0.159043	-0.144099	-0.104716	-0.488447	0.304779	-0.133284	1.35818	1.35559	-0.502769	0.981495	-0.75182	-0.204448	-0.535789	-0.0285162	-0.354439	0.0919392	-0.293997	-0.550984	0.0864981
chr1_38018930_38069196	-0.0180356	-0.215973	0.168313	-0.1399	0.0138232	-0.794808	-0.35201	-0.438437	-0.387751	-0.378919	-0.00573274	-0.0716489	-0.00182998	-0.0705432	-0.127142	-0.492007	-0.270842	-0.0348862	-0.1172	0.163416	-0.739375	-0.202757	-0.182135	0.078457	-0.27003	-0.0407839	0.0906842	-0.761931	-0.674926	-0.00309123	0.0947015	-0.0549147	-0.176184	-0.462012	0.160558	-0.210798	-0.307168	-0.183227	-0.24964	-0.0366883	-0.385622	-0.092493	-0.592545	-0.546412	-0.0642065	-0.645187	-0.754931	0.0122298	-0.36861
chr1_38069196_38119298	0.0168313	0.0906231	0.178418	-0.569705	0.0372406	0.0988691	-0.245139	0.188274	-0.119466	0.1103	-0.0640944	-0.0313816	-0.071088	0.119798	0.113126	0.11934	0.266688	-0.270995	0.142453	0.150355	-0.257334	-0.162569	-0.555308	0.182351	0.0862114	-0.198919	-0.479555	0.070139	-0.0742983	-0.132496	-0.12265	-0.0256605	-0.0414498	-0.06578	0.357361	-0.567983	-0.188169	-0.208187	-0.238168	-0.335202	-0.148019	0.00673133	-0.256442	0.0387153	-0.208033	-0.345729	-0.315204	0.000845699	0.0430968
chr1_38119298_38169398	-0.00972563	-0.0653051	-0.702014	0.232768	-0.2544	-0.0496004	0.0686779	0.193218	-0.0620203	0.10637	-0.644483	-0.0748522	-0.190956	0.0895053	0.0998775	0.384236	-0.0805711	-0.388973	-0.0347286	0.686731	-0.0975999	-0.117934	-0.364351	0.195025	-0.225366	0.0317966	-0.306321	-0.0660368	-0.130181	-0.138994	0.460698	0.0465781	-0.141629	-0.171069	0.447203	-0.0998686	0.246605	0.195031	-0.463065	0.418236	-0.303896	-0.110606	0.0578091	-0.0419986	-0.536273	0.174654	-0.208462	-0.206843	0.0781388
chr1_38169398_38219596	-0.179826	0.121498	0.235424	-0.0134561	-0.183694	-1.15762	-0.263643	0.107253	0.0813026	-0.220498	0.144419	0.0405134	-0.0732388	0.0187051	-0.0516699	-0.105973	0.141981	0.421003	-0.408055	-0.155535	0.143623	0.152306	-0.126893	0.236906	-0.047235	-0.20695	0.0531059	-0.0437795	-0.219535	-0.343445	-0.661077	-0.0882603	-0.0457745	0.0817247	0.258203	0.0719452	-0.0731675	-0.533977	-0.148529	-0.17491	0.164118	-0.0622936	-0.355362	-0.194897	-0.18297	-0.202693	0.151881	0.37997	-0.26842
chr1_38219596_38270453	0.149879	0.234291	0.13428	1.29488	-0.215593	1.27436	-0.112723	1.18308	-0.141055	1.13771	0.487799	0.125765	0.131709	0.693444	0.644112	2.19242	0.88795	0.674951	0.410195	1.5062	0.384727	0.920174	1.02386	0.46453	0.0370323	0.49393	0.370836	0.277666	0.326101	0.160758	0.888535	0.35206	-0.0204905	0.116899	0.738703	0.0959546	1.74041	1.48997	-0.15436	1.23715	-0.0762302	0.234574	0.0790336	0.685272	-0.144231	0.262713	0.257122	0.236291	0.138236
chr1_38270453_38320640	-0.0603647	-0.121241	-0.700863	-0.124931	-0.19561	0.0423234	-0.354158	-0.930183	-0.0172802	-0.199584	-0.274509	0.0179053	-0.298238	0.0231839	-0.183965	-0.459254	-0.120851	-0.441673	-0.0847378	0.175355	-0.160117	0.417489	0.0513605	0.00899687	-0.272406	-0.145015	-0.467583	-0.373106	0.0336148	-0.321564	-0.224197	-0.264058	-0.330922	0.0355873	0.243887	-0.1497	0.0593844	-0.356977	-0.302521	0.103336	-0.373948	-0.00243772	0.0576523	-0.442427	-0.161474	-0.154748	0.19126	-0.15718	-0.221567
chr1_38320640_38372118	-0.404425	-0.245176	-0.558961	-0.207266	-0.180189	0.400897	-0.166825	-0.134202	-0.236638	-0.771339	-0.101246	-0.18239	-0.525237	-0.0967947	-0.0754287	-0.0489063	-0.275774	0.0961722	-0.243865	0.377023	-0.262728	-0.171149	-0.370841	-0.0386656	-0.407649	-0.103954	-0.318252	-0.230651	-0.248162	-0.0896111	-0.993861	-0.321601	-0.139958	-0.0722152	0.133624	-0.261335	0.414229	0.0788457	-0.487842	-0.295719	-0.235373	-0.194365	-0.380939	0.471669	-0.193658	-0.52241	-0.313672	-0.384531	-0.676321
chr1_38372118_38423148	-0.244762	-0.403039	-0.285907	-0.420833	-0.151043	-0.951065	-0.458533	-0.767002	-0.347055	-0.25643	-0.124712	-0.160535	-0.382644	-0.619708	-0.673141	-0.466197	-0.7528	-0.495569	-0.408106	-0.282606	-0.444463	-0.413183	-0.817252	-0.459551	-0.736041	-0.538894	-0.298976	-0.253921	-0.207962	-0.498143	-0.431115	-0.35075	-0.272129	-0.397768	0.0639898	0.146697	-0.388255	-0.515797	-0.252644	-0.582686	-0.148753	-0.440244	-0.542652	0.0296433	-0.183012	-0.524749	-0.177892	-0.494577	-0.392493
chr1_38423148_38474138	-0.0774357	-0.509502	0.332858	-0.207228	-0.157748	-0.892044	-0.169219	-0.600056	-0.223859	0.269993	0.18443	-0.410098	-0.56472	-0.0784714	-0.186851	0.248979	-0.250797	-0.215205	-0.18042	0.239156	-0.140134	0.0189683	-0.0781386	0.101565	-0.711403	0.0216935	-0.11972	-0.526263	-0.313408	-0.306307	-0.0805603	-0.16203	0.0274711	-0.0115365	0.147563	0.0921422	0.41727	0.491358	-0.461922	0.199966	-0.563461	-0.351441	-0.109784	0.352121	-0.182065	-0.185797	-0.332575	-0.320286	-0.667874
chr1_38474138_38524377	-0.0114153	0.035442	-0.372413	0.722002	-0.165861	1.17698	-0.179609	1.90865	-0.0639725	0.884438	0.0921009	-0.10127	-0.262818	0.404236	0.194331	1.54499	0.213471	0.102437	0.116938	1.39239	-0.146509	0.176952	0.400351	0.434671	-0.0449054	0.124676	0.0768631	0.112751	0.482264	-0.274615	0.97671	0.173857	0.468393	-0.302798	0.533533	-0.22101	1.12125	1.81546	-0.201143	0.608105	0.184302	0.242872	0.222739	0.301861	-0.290829	0.113536	-0.312517	0.472273	-0.411487
chr1_38524377_38574486	0.306696	0.440168	0.0541685	-0.142757	0.483986	0.397967	0.156318	-0.149716	0.365573	-0.247509	-0.320661	0.363714	0.159748	0.140219	-0.0993467	-1.77104	0.151691	-0.445926	0.106426	-0.0401528	0.591002	-0.128738	-0.20043	0.219581	0.164366	0.175726	-0.04468	-0.664559	0.256245	0.381006	0.354429	0.148988	0.27404	0.252398	0.586431	0.0402387	-0.488562	-0.0708767	0.161344	-0.544938	0.196096	0.341489	0.405601	0.328118	0.362303	-0.288515	0.390078	0.0435709	0.0122397
chr1_38574486_38624624	0.121772	0.128665	0.143652	0.160471	0.106614	0.311076	-0.0218868	0.736207	-0.221349	0.338146	0.264311	0.180731	0.211188	0.06862	0.0581627	-0.38362	0.0569586	-0.16444	-0.0424401	0.540717	0.0966585	-0.0841142	-0.62812	0.444736	0.34142	0.0454985	0.26675	0.337138	0.251736	0.294495	0.453781	0.155723	0.317521	0.253335	0.538239	0.0751185	-0.0425857	0.0613447	-0.0370683	0.102745	0.124633	0.188415	0.0422149	0.0770453	-0.217132	0.0515025	-0.0439186	0.0825242	0.173907
chr1_38624624_38674795	0.272423	0.374052	0.492905	0.49748	0.342968	-0.123289	0.145864	0.106794	0.189039	-0.030885	0.35082	0.192114	0.275298	0.342828	0.174184	-0.0514869	0.552353	0.564464	0.412584	0.331919	-0.157406	0.513186	-0.238829	0.450334	0.493309	0.0304463	0.215591	0.205554	0.169585	0.166558	0.401509	0.209252	0.415623	0.0237414	0.567831	0.0115963	0.655893	0.0505333	0.242382	0.286555	0.180715	0.303027	0.238163	0.475819	-0.0950131	-0.0103876	-0.123757	-0.140285	0.42971
chr1_38674795_38724872	-0.0886901	-0.0113101	0.0508271	-0.320416	0.0429284	0.700795	0.0941864	0.182785	0.190839	-0.0669704	-0.169177	0.212875	-0.00707647	0.186664	-0.0305038	-1.08743	-0.0781482	-0.189215	-0.0972092	0.11682	0.0550572	-0.43691	-0.774213	0.22248	0.328693	0.184884	0.0855251	-0.325459	0.0197132	0.4432	0.237882	0.109484	0.642858	0.168913	0.327769	-0.00278066	-0.932939	-0.488765	-0.368617	-0.741491	0.149917	0.161935	0.334481	-0.305926	-0.0116822	-0.38881	0.0734468	-0.0203908	0.215207
chr1_38724872_38774913	0.204267	0.0664436	-0.467681	-0.631914	-0.0714458	-0.648692	-0.0880081	-0.237438	-0.214936	-0.185011	-0.277369	0.341699	-0.183768	-0.218305	-0.170278	-0.51431	-0.17182	-0.176139	0.139758	-0.160476	-0.368751	-0.0510671	-0.572096	0.43454	0.306916	0.0140499	-0.305299	0.0316445	0.170052	0.24049	0.219403	0.0193611	0.081079	-0.251151	0.427511	-0.0156759	0.0159732	-0.0772329	-0.197226	-0.626711	0.114702	-0.00554896	-0.152776	-0.11384	-0.120747	-0.211316	0.250675	-0.480212	0.111606
chr1_38774913_38825085	0.300127	0.274479	-0.091515	-0.0160995	0.591761	-0.331917	-0.223063	0.246029	0.413646	-0.359662	0.202255	0.394807	0.60058	0.220618	0.391919	-0.0884403	0.365414	0.284638	0.424556	0.373706	0.175457	0.272727	-0.0235161	0.706528	0.341518	0.0354854	0.377089	0.475276	0.513209	0.445353	-0.032844	0.0775661	0.303489	0.53498	0.558007	0.104532	0.319524	-0.475586	0.245333	-0.347926	0.562094	0.351012	0.270433	-0.487283	0.232778	0.00741577	0.266932	0.217767	0.11425
chr1_38825085_38875101	-0.167369	-0.24782	-0.0404273	-0.24512	0.0902363	-0.0116433	-0.279052	-0.489605	-0.103453	0.0344324	-0.31029	0.282938	0.232245	-0.215962	-0.207919	-0.0938388	-0.247491	-0.137655	0.00776105	-0.12878	0.0565642	0.061166	-0.830263	0.419809	-0.05741	-0.0785069	-0.387611	-0.307788	0.215334	-0.0938521	0.103164	0.162708	0.396095	-0.100888	0.110616	-0.37359	-0.130142	-0.21609	-0.316851	-0.0879188	0.0769956	-0.0676498	-0.301297	-0.170424	-0.421228	-0.432556	-0.0653737	-0.0332051	0.0862356
chr1_38875101_38926606	0.0164054	-0.071349	-0.317833	-0.403859	-0.27618	-0.113282	-0.21372	-0.34724	-0.181552	-0.577303	-0.558453	-0.085203	-0.114171	-0.306594	-0.206784	-0.471167	-0.881914	-0.782357	-0.242058	0.122053	-0.69381	0.0174484	-0.93351	0.0192692	-0.0212283	-0.235838	-0.274078	-0.420681	-0.16466	-0.0884891	-0.264043	-0.286493	0.13133	-0.0699077	0.20714	-0.214265	-0.298295	-0.186133	-0.364555	-0.294219	0.414422	-0.114819	-0.345347	-0.157869	-0.41633	-0.0880124	-0.196556	-0.126193	-0.11847
chr1_38926606_38977109	0.396838	0.367454	0.290914	-0.0907268	0.0511839	0.392657	0.188451	0.232966	0.0689313	0.129758	0.028556	0.353725	0.27932	0.114948	0.108895	-0.474657	0.00554188	0.307799	0.140337	0.472673	0.285521	0.490498	-0.163766	0.468128	0.429607	0.0946673	-0.0413528	0.372957	0.170829	0.143309	0.427283	0.200682	0.0148528	0.174508	0.500657	0.0410373	0.402945	0.012591	0.456681	0.239118	0.549162	0.152191	0.408688	0.0668485	-0.135708	-0.0594794	0.249533	-0.177486	-0.0593811
chr1_38977109_39027245	0.145334	0.18258	0.816098	-0.110928	0.0213857	-0.352272	-0.202564	0.176697	-0.0638472	0.290844	0.398986	-0.0847816	0.276223	-0.0244528	0.124068	-1.22427	-0.0485097	0.034573	-0.0015457	-0.211132	0.270483	0.121793	-0.78962	0.146689	0.198573	-0.0174856	-0.0623663	0.391774	0.0311732	0.0986743	-0.0142443	0.044868	0.0454175	0.171047	0.362099	0.116855	-0.0383093	-0.243641	-0.111115	-0.669923	-0.312684	0.0554856	-0.182295	0.0593252	0.0550244	-0.259794	0.309224	0.0507106	-0.134346
chr1_39027245_39077297	0.0929877	-0.178186	-0.233479	-0.114563	-0.141689	-0.422656	-0.00658923	0.0606763	0.0533227	0.208969	0.221917	0.384173	0.202947	-0.415936	-0.0413247	-1.44867	0.171038	-0.193433	0.15849	0.0672781	-0.0589419	0.108106	-0.45046	0.324242	0.158681	-0.0775106	0.0947643	0.344257	-0.217375	0.537573	0.266786	0.175232	-0.176896	0.180239	0.420991	0.0211558	-0.156411	-0.242401	-0.066226	0.076697	0.0819406	0.130791	0.145709	-0.314403	-0.04641	-0.165397	-0.0652824	-0.170096	0.133167
chr1_39077297_39128452	0.0470131	0.175123	0.0687056	-0.69767	0.178866	-0.651943	-0.141053	0.221437	0.107791	-0.0671016	0.0594957	0.370687	0.121203	-0.0980757	0.0547746	-0.528838	-0.170564	-0.182637	0.0804551	0.200269	0.103533	0.0915018	-0.858666	0.199336	0.119293	0.0836978	-0.0330683	-0.476621	0.143079	0.148843	-0.14557	0.126077	0.293425	0.0887656	0.438386	-0.200702	-0.559265	-0.954322	-0.108034	-0.0428681	-0.216693	0.0813031	0.0475396	-0.784579	-0.156609	-0.0946886	-0.103253	0.0326364	-0.226119
chr1_39128452_39179156	0.147502	0.372453	-0.0123044	0.335115	0.0380579	0.775134	0.192731	0.0526284	-0.00558572	0.159742	-0.218167	0.345197	0.283949	0.228836	0.0994382	1.0149	0.411663	0.170186	0.361039	0.459739	-0.405276	-0.329347	0.281914	0.351967	0.239958	0.053208	0.34645	0.326687	0.340612	0.097389	0.105014	0.194277	0.310512	0.386072	0.640593	0.270645	0.696764	0.226923	0.202803	-0.0682614	0.39396	0.208506	0.393614	0.515957	-0.140195	0.259217	0.424841	0.00570625	0.160354
chr1_39179156_39229250	0.0602456	-0.046754	-0.161718	-0.298433	-0.385021	-0.522247	-0.196338	0.0286724	-0.131127	-0.134079	-0.776442	0.189384	-0.295886	-0.0172283	-0.272943	-0.850741	-0.271614	-0.29904	0.0589608	0.116989	0.0520556	-0.397963	-0.657485	0.0833798	0.30157	0.149969	-0.0192049	0.13636	0.222461	0.0209288	0.331773	0.0706873	0.0814994	-0.125759	0.501476	-0.0406881	-0.50642	-0.0940405	-0.161123	-0.664639	0.0885398	0.202038	0.0606265	-0.470984	-0.155266	-0.271501	0.0408226	-0.343722	0.182019
chr1_39229250_39280696	0.0523798	-0.169737	0.194374	0.189887	-0.090969	0.483135	-0.14778	-0.0677092	0.0132332	0.26794	0.684504	0.245109	0.12095	0.314204	0.192874	0.387196	0.231562	0.931502	0.0649989	0.44954	-0.433715	0.101341	0.110044	0.407012	0.111558	0.0883064	0.148452	0.699391	-0.40005	0.0286873	0.464536	0.0316131	0.0363966	0.105974	0.440467	0.0429646	0.380035	0.710149	-0.224181	0.0528473	0.0579514	0.131801	0.29066	0.803507	0.00125226	-0.14262	-0.240752	-0.136685	-0.00213761
chr1_39280696_39331011	-0.0893176	-0.154455	0.599603	0.352983	-0.243959	0.406163	-0.334702	0.371395	-0.329522	0.52765	0.357813	-0.265217	0.0488889	-0.0782203	0.305355	1.44985	0.106573	0.713284	-0.0947665	0.557568	-0.341818	0.333839	0.00808356	-0.100026	-0.0248728	-0.115539	0.151842	0.734189	-0.510805	0.101881	0.127716	-0.13109	-0.161127	-0.135196	0.236228	-0.412997	0.908405	0.838393	-0.736851	0.577658	-0.134023	-0.233025	-0.458967	-0.401086	-0.420107	-0.167663	-0.434266	-0.1945	0.136297
chr1_39331011_39381908	-0.447035	-0.125054	-0.980848	0.606378	-0.304049	0.729008	-0.217071	-0.154039	-0.227512	0.278604	0.378395	-0.307098	-0.222229	0.0410614	-0.0213963	1.6782	0.144871	0.406998	-0.15514	0.55555	-0.615711	0.0160638	0.58631	0.180273	-0.557991	-0.0950699	-0.00505974	0.769444	-0.345436	-0.293016	0.126526	-0.358922	0.109754	-0.177132	0.196197	-0.295713	0.874277	0.568084	-0.630464	0.412497	-0.169865	-0.484242	-0.87288	-0.0668872	-0.160819	-0.0426925	-0.375806	-0.493892	-0.612158
chr1_39381908_39432813	-0.282281	-0.625811	-0.0165919	-0.375162	-0.0230318	-0.302866	-0.110921	-0.38376	-0.214042	0.0668013	-0.306029	-0.350694	-0.546223	-0.567163	-0.281637	-0.151099	-0.391053	-0.0197379	-0.304597	-0.415724	-0.00794557	-0.0313375	-0.974029	-0.180339	-0.903	-0.340927	-0.749104	-0.270521	-0.454875	-0.439755	-0.0612986	-0.330283	-0.323204	-0.18277	-0.0311782	-0.482444	-0.19805	-0.0367886	-0.726908	-1.06372	-0.497108	-0.5183	-0.535945	-0.150161	-0.0811614	-0.217173	-0.152278	-0.105368	-0.151959
chr1_39432813_39483242	-0.714748	-0.514499	-1.17519	-0.220191	-0.662076	0.549767	-1.1696	-0.181149	-1.01645	0.247953	-0.791019	-0.643925	-0.944493	-0.508819	-0.264848	0.814067	-0.127178	-0.388072	-0.619614	0.443363	-0.895963	-0.416414	-0.138256	-0.21668	-0.95217	-0.192995	-0.489667	-0.593724	-0.916029	-0.898226	-0.0190436	-0.633993	-0.671292	-0.866462	-0.317017	-0.614538	0.527877	0.837159	-0.76908	0.286117	-0.43585	-0.493037	-0.593358	-0.656027	-0.546112	-0.589775	-0.823348	-0.68828	-0.445924
chr1_39483242_39533790	-0.293939	-0.196823	0.111619	0.167465	-0.0387673	-0.0668345	-0.404577	0.0840575	-0.247216	-0.00831625	-0.280076	-0.667957	-0.305058	-0.357773	-0.139109	0.290914	-1.12463	-0.06015	-0.645013	-0.184004	-0.2488	-0.32277	-0.142507	-0.144774	-0.578069	-0.129589	-0.418706	-0.221176	-0.561418	-0.481771	-0.195473	-0.234373	-0.341263	-0.52005	0.116862	-0.127576	-0.51247	0.507337	-0.411628	-1.15058	-0.523203	-0.305136	-0.193641	-1.35666	-0.120619	-0.555668	-0.37112	0.0102631	-0.368248
chr1_39533790_39584152	-0.00834777	0.0182747	0.213623	0.380061	-0.17389	0.425112	-0.0682333	0.495178	-0.314164	0.38009	0.212443	-0.149879	-0.342028	0.23997	-0.108136	0.883478	0.00895499	-0.0951787	-0.00612841	0.440428	0.386464	-0.108041	-0.0778663	0.0564066	-0.384464	-0.302329	-0.158725	-0.146639	-0.236649	-0.042356	0.0765657	-0.29321	-0.277744	-0.085696	0.398555	-0.00246482	0.443033	0.762222	-0.365598	0.331127	-0.0770881	-0.133293	-0.391041	0.384875	-0.397206	-0.297292	-0.100588	0.0604232	-0.150003
chr1_39584152_39634592	-0.246327	-0.42849	-0.182662	-0.369389	-0.321383	-0.111769	-0.189017	-0.00147928	-0.238943	-0.541165	-0.648572	0.150123	-0.973674	-0.535762	-0.614928	-0.480236	-0.302523	-0.792695	-0.344533	-0.230444	0.135461	-0.346095	-0.186263	-0.153568	-0.810707	-0.565384	-0.094696	-0.0908054	-0.241025	-0.475682	0.336507	-0.47883	-0.143992	0.0600633	0.173802	0.0935186	-0.27647	0.479789	-0.366213	-0.555897	-0.863976	-0.36361	-0.299901	-0.164876	-0.0205736	-0.621618	-0.482536	-0.131762	-0.793535
chr1_39634592_39685047	-0.127463	-0.582224	-1.89988	-0.372025	-0.364872	-0.217795	-0.424496	0.0486429	-0.308765	-0.30249	-0.441649	-0.232253	-0.872486	-0.139084	-0.570423	-0.290485	-0.0589321	-0.738906	-0.697633	0.263158	-0.109255	-0.991062	-0.188	-0.577449	-0.966866	-0.287588	-0.930252	-0.340918	-0.564457	-0.475771	-0.271846	-0.392627	-0.418012	-0.474391	-0.0489963	-0.581436	-0.248083	-0.234427	-0.486908	-0.628974	-0.52088	-0.462762	-0.730911	-0.552363	-0.4583	-0.325934	-0.54725	-0.685443	-0.549716
chr1_39685047_39736405	-0.183749	0.0346816	-0.0370185	0.0835569	-0.277859	-0.746564	-0.280656	-0.0529235	0.137301	-0.0891876	0.112109	0.0326742	-0.0795772	-0.183947	-0.244445	-0.195552	-0.35415	0.269332	-0.210755	-0.125037	-0.163975	-0.0788449	-0.182487	0.162149	-0.294223	-0.141893	0.0759417	-0.0848145	-0.122106	-0.0331557	-0.0155502	-0.306181	-0.218221	-0.151516	0.182448	0.122141	0.0384895	-0.398372	-0.549614	-0.187693	0.294213	-0.120888	-0.00516188	-0.0786105	-0.0589278	-0.37315	0.124336	-0.00306813	-0.0229664
chr1_39736405_39786688	-0.0798404	-0.577327	-0.060229	0.263146	0.00893056	-1.03245	-0.0096745	0.109846	-0.265286	-0.129735	0.396572	0.0598127	-0.212872	-0.528364	-0.21825	0.134825	-0.148251	-0.0432282	-0.307421	-0.16348	0.051911	-0.653542	-0.068068	-0.0306515	-0.216577	-0.247422	-0.410057	-0.980056	-0.292771	-0.326251	-0.501319	-0.0272143	-0.149381	-0.384914	0.359153	-0.147961	-0.136735	-0.24743	-0.625637	-0.054202	0.0554909	-0.264755	0.0614193	-0.290189	0.090725	-0.037792	-0.543107	-0.400047	-0.212929
chr1_39786688_39836991	0.10142	0.325851	-0.171755	-0.395581	0.0586843	0.0362988	0.0507845	0.178701	0.0722541	-0.278836	0.0932074	0.217773	-0.284257	0.00457786	0.220259	0.623033	-0.14242	-0.398105	0.10309	0.0434844	-0.133372	0.0161425	-0.327968	0.442013	-0.0146111	0.0210164	-0.142976	0.492785	-0.155944	-0.0642052	0.192576	0.26189	-0.0942425	0.260225	0.319664	-0.145849	0.547517	0.417706	-0.197307	-0.519143	-0.0211773	0.0889022	0.211005	0.15225	0.232843	0.121225	-0.162467	0.0452176	0.167386
chr1_39836991_39887363	-0.149702	0.088003	0.664535	0.784319	0.0363376	0.891525	0.00532624	0.814701	-0.163968	0.952292	0.225243	-0.322112	-0.246091	-0.0190233	0.0651322	1.58346	-0.0662643	0.425269	-0.0694039	0.91547	0.0884071	0.551555	0.520724	0.265616	-0.20248	-0.141146	0.112955	0.549214	-0.17618	-0.394479	0.174944	-0.114808	-0.465719	-0.514824	0.269564	0.112782	0.695996	1.24123	-0.191207	1.04694	-0.0755909	-0.0950459	-0.0762327	0.266366	-0.0601183	0.345821	-0.436149	-0.0107808	-0.398869
chr1_39887363_39937793	0.174798	-0.073224	0.561503	0.00641567	0.188758	-0.269759	-0.279435	-0.43229	0.161753	-0.723526	-0.622909	0.0706423	-0.0602595	0.00158266	-0.0132657	-0.460115	-0.101768	-0.228829	0.113488	-0.0943568	-0.108709	-0.0771719	0.0794571	0.072609	-0.29802	0.172971	-0.321906	-0.357926	-0.00886489	-0.13604	0.0127235	-0.0484248	-0.21165	-0.190498	0.365669	0.110421	0.0037866	-0.00354564	-0.0073698	-0.372794	-0.158538	-0.0654553	0.111788	-0.647211	-0.211309	0.0828735	-0.160348	-0.325034	-0.144215
chr1_39937793_39988079	-0.405111	-0.704117	-0.626654	-0.334157	-0.402094	-0.266947	-0.592698	0.598193	-0.865015	0.251718	-0.524323	-0.471924	-0.626468	-0.526656	-0.667128	-0.0149661	-0.374852	-0.735353	-0.583045	0.147596	-0.377535	-0.702384	-0.832847	-0.28789	-0.956658	-0.487455	-0.536435	-0.71934	-0.468366	-0.832751	-0.411786	-0.439265	-0.975007	-0.697266	-0.20961	-0.672323	-0.281176	0.606783	-0.780735	-0.673629	-0.933023	-0.340253	-0.52316	-0.473003	-0.385691	-0.229193	-1.05723	-0.745154	-0.566407
chr1_39988079_40038566	-0.255345	-0.339312	0.472728	-0.105624	-0.329669	-0.345623	-0.217216	-0.671791	-0.435958	-0.322854	0.518572	-0.118766	-0.0850363	-0.539632	-0.0994913	-1.421	-0.100078	0.468995	-0.658304	-0.151617	-0.199967	-0.117851	-1.21982	-0.0123838	-0.277222	-0.268649	0.00168744	0.216659	-0.239128	-0.270195	-0.542356	-0.377459	-0.0231156	-0.0653611	-0.00990081	-0.581493	-0.0351833	-0.251007	-0.125964	-0.21784	0.0341049	-0.336462	-0.302422	-0.441638	-0.456899	-0.688318	-0.105407	-0.37555	-0.608441
chr1_40038566_40089149	-0.53674	-0.222334	-1.22356	0.0137058	-0.324423	-0.308109	-0.463346	-0.688517	-0.104532	0.0671917	-0.526498	-0.262645	-0.630227	-0.277581	-0.24105	0.340579	-0.456116	-0.338112	-0.185615	0.234163	-0.652147	-0.0853832	-0.190291	0.0221207	-0.639526	-0.431773	-0.160308	-0.668994	0.0501296	-0.599155	-0.35992	-0.190423	-0.616939	-0.0166888	0.0208916	-0.370841	-0.218908	0.156236	-0.427226	0.432264	0.018119	-0.240268	-0.309877	-0.162747	-0.236507	-0.179241	-0.380789	-0.3175	0.00955445
chr1_40089149_40139287	0.0383649	-0.220873	-0.450939	0.0414354	-0.0367932	0.14953	0.136478	0.178725	0.112368	0.54031	-0.492724	0.0177316	-0.0717029	0.204847	-0.0637232	0.482309	0.0712886	-0.503179	0.178649	0.623018	0.185469	0.29652	-0.0956168	0.41494	-0.0448009	0.169915	-0.221014	-0.102353	0.224495	0.245063	0.170439	0.155533	0.175269	-0.0911491	0.466913	0.0090553	0.143997	0.263116	-0.173223	0.0198281	-0.384836	0.213177	0.452761	0.425665	0.05717	0.248678	-0.288215	0.24153	0.023733
chr1_40139287_40189640	-0.118716	-0.212848	-0.0380192	0.194153	-0.382824	0.358966	0.0391161	-0.453157	-0.00825585	-0.234705	-0.270512	-0.255963	-0.0764688	-0.166033	0.03464	-0.699216	-0.131891	0.302274	0.0138188	0.142007	0.133003	0.229461	-0.736457	0.120272	-0.0039493	0.100936	-0.204953	0.152596	0.134752	-0.0228928	-0.262516	-0.0735974	-0.291563	-0.0895701	0.184781	-0.111493	0.174483	-0.331218	-0.185994	0.419584	-0.589974	-0.0493602	0.112886	-0.109475	-0.0955583	-0.165475	-0.26602	-0.202354	-0.323051
chr1_40189640_40239652	-0.418415	-0.185233	-0.176371	-0.127422	-0.283148	-0.403772	-0.275935	-0.160657	-0.214747	-0.787679	0.301758	0.0744723	0.00584531	-0.360528	-0.293286	-1.09204	-0.391413	0.319348	-0.448514	-0.0556317	-0.576421	0.348231	-0.212898	0.0622806	-0.0720786	-0.098262	0.0602169	0.218417	-0.284524	-0.0462881	-0.288941	-0.202213	-0.258106	-0.307567	0.0268974	-0.208129	0.148745	-0.608666	-0.626863	0.279352	-0.063264	-0.326063	0.0819322	-0.388905	-0.336283	-0.451937	-0.198507	-0.278817	-0.280021
chr1_40239652_40290206	-0.384638	-0.281721	-0.559679	0.263772	-0.116428	0.364788	-0.254708	1.20959	-0.27213	0.584994	-0.458818	-0.0995026	-0.367452	-0.103065	-0.198169	0.641018	-0.466045	0.0100456	-0.102421	0.942499	-0.508409	0.0605902	0.110978	0.17557	-0.238198	-0.118851	-0.148459	-0.218021	-0.131678	-0.420951	-0.272005	-0.222441	-0.482349	-0.154741	0.249432	-0.0795382	0.394229	0.929467	-0.605909	0.0393548	-0.406935	-0.199062	-0.318337	0.0990731	-0.0789505	-0.0380487	-0.433454	0.121898	-0.263945
chr1_40290206_40340682	-0.240572	-0.232178	-0.19457	0.00484264	0.00806817	0.167793	-0.458314	-0.16347	-0.347995	-0.38202	-0.664424	-0.193111	-0.151242	-0.318594	-0.383374	-0.712229	-1.25041	-0.0919884	-0.183492	-0.551242	-0.863635	0.133071	-0.947717	-0.388347	-0.459984	-0.122867	-0.0329389	0.110321	-0.174381	-0.270023	-0.496193	-0.112458	-0.333403	-0.257385	0.158174	0.178001	-0.000368424	0.08288	-0.311976	-0.151308	-0.176828	-0.0225869	-0.556589	0.197058	0.105856	-0.1689	0.140805	0.0470914	-0.229535
chr1_40340682_40391626	-0.271901	0.183887	-0.204483	0.988818	0.0707028	0.474105	-0.205571	-0.0878136	-0.167041	0.559451	0.213786	-0.282662	0.125188	0.157435	0.0837051	1.96528	0.238157	0.270046	-0.17866	0.913046	0.143851	0.305413	0.237305	0.622504	-0.501561	-0.0401625	0.122001	0.511792	0.147764	-0.363241	-0.110614	-0.182775	0.0580141	-0.286079	0.483017	-0.0493438	1.67505	1.39849	-0.398132	0.967949	-0.269731	-0.317219	-0.346225	0.311027	-0.0220998	0.0014637	0.0218287	-0.72346	0.185971
chr1_40391626_40442066	-0.159599	0.219451	-0.17329	0.0895996	0.0368861	0.748752	-0.076033	-0.764838	0.0102311	0.342968	-0.569311	0.16016	-0.127327	0.242784	-0.369776	0.631435	0.256892	-0.340302	0.115179	0.581087	0.22797	0.124551	0.138007	0.575998	-0.229451	0.181266	0.188303	-0.728782	-0.14852	-0.00202598	-0.0168034	-0.0831675	0.39366	-0.0958836	0.42946	0.10739	0.551429	0.208042	-0.0765592	0.380981	-0.278709	-0.0649451	-0.137434	-0.289032	0.406136	0.0192808	-0.209009	-0.525436	-0.163614
chr1_40442066_40493557	-0.115975	-0.245311	-0.404698	-0.176256	-0.22531	-0.450333	-0.230829	-0.274269	-0.403295	-0.016129	-0.375431	-0.0757889	-0.356118	-0.228205	-0.344123	0.216671	-0.257472	-0.619891	-0.281367	0.0484635	-0.00622998	-0.030513	-0.193315	-0.119771	-0.975255	-0.0316846	-0.3697	0.121593	-0.107847	0.0815759	-0.0373687	-0.252322	-0.375758	-0.0479021	0.133207	-0.0207775	-0.60844	0.400648	-0.563673	-0.556346	-0.275418	-0.251292	-0.135831	0.00456309	-0.160346	-0.217343	-0.434986	-0.766136	-0.760065
chr1_40493557_40543846	0.0892294	0.272812	-0.260859	0.261987	0.142253	-0.328504	-0.440496	0.0572104	0.163125	0.198014	0.10209	0.0767307	0.160566	0.215035	-0.055457	0.672709	0.0191506	0.0231066	-0.158453	0.0232504	-0.408023	0.248321	-0.0978968	-0.0342399	-0.213265	0.124059	-0.335577	-0.945893	-0.133059	-0.0256943	-0.683727	0.132725	0.000768336	0.14602	0.29889	-0.0393158	0.225932	0.538398	-0.244103	-0.115029	0.0705069	-0.112172	0.0722899	0.265439	0.632969	-0.205027	-0.241652	-0.135032	-0.14444
chr1_40543846_40594136	0.0162673	0.151721	0.688416	0.731414	0.293854	0.701063	0.0408299	-0.152928	0.0409074	0.722548	0.334965	-0.0995701	0.0460167	0.301374	0.28158	1.55466	0.471379	0.301034	0.295071	0.931434	-0.095473	0.233137	0.266985	0.504332	-0.216035	0.302006	0.334856	0.0522771	-0.000184288	-0.32154	0.428367	0.0805312	0.172869	0.11209	0.49036	0.0686429	0.909669	0.884111	-0.261356	0.79347	0.0305874	-0.101099	0.0311507	0.535102	-0.0238799	0.102964	0.199906	0.005283	0.199357
chr1_40594136_40644837	-0.0705004	-0.0129974	0.5409	0.476972	-0.153291	-0.181028	-0.313568	-0.264018	-0.0963936	0.16692	0.962562	-0.104761	-0.118389	-0.173376	0.0879831	1.07124	-0.254614	0.558596	0.116805	0.40764	-0.753006	0.581962	-0.303296	0.133082	-0.15194	0.0681519	0.296495	0.613562	-0.423555	0.013448	-0.588426	-0.120242	-0.0328221	-0.264265	0.281954	-0.172442	0.603371	0.106034	-0.274791	0.499096	0.087007	-0.252845	-0.15974	-0.295047	-0.203903	0.0767267	-0.0236044	-0.362512	-0.397843
chr1_40644837_40695153	-0.108339	-0.218074	0.16044	-0.00936303	-0.16451	0.40614	-0.13612	-0.268717	-0.161209	0.266319	0.164399	-0.265055	-0.17017	-0.32047	-0.361503	0.158144	-0.231717	-0.354831	-0.139733	0.263373	-0.546499	-0.652875	0.0220793	-0.221342	-0.505852	-0.338433	-0.117227	-0.330556	-0.514579	-0.0156834	-0.196291	-0.0810174	-0.304952	-0.316672	0.323941	-0.0783445	0.261868	0.583085	-0.234236	-0.854289	-0.363606	-0.272874	-0.199236	0.0465101	0.0741187	-0.0255634	-0.469215	-0.298815	-0.0949142
chr1_40695153_40745744	-0.469412	-0.437768	0.441244	-0.423719	-0.316104	-0.557329	-0.0649725	0.298889	-0.298044	-0.551231	0.141538	-0.159271	-0.419574	-0.401932	-0.100656	-0.269093	-0.424397	0.0776061	-0.307201	-0.0476772	-0.0867441	-0.661273	0.0178818	-0.260379	-0.445673	-0.174727	-0.288471	0.0778197	-0.189309	-0.786917	-0.501715	-0.144767	-0.235889	-0.279765	0.197699	-0.0203928	-0.110314	-0.0354443	-0.390401	-0.465697	-0.368918	-0.171967	-0.273525	-0.295416	-0.177477	-0.032479	-0.620248	0.0818121	-0.315657
chr1_40745744_40795992	-0.225477	-0.160796	0.643571	0.827925	-0.320878	0.534605	-0.107251	-0.217052	-0.055556	0.389569	0.83973	-0.0220457	0.154257	0.302946	0.431487	1.51743	0.0699399	0.63325	0.0755049	0.748277	-0.19861	0.39416	0.25121	0.50336	0.0528188	0.276098	0.337096	0.660183	0.0545465	0.00265286	-0.127696	-0.100693	-0.0367031	0.0189164	0.707667	0.0828086	1.26326	0.581661	-0.369866	0.932667	0.209907	0.028899	-0.224361	0.275787	-0.0705541	0.077994	-0.319624	-0.131027	-0.492328
chr1_40795992_40850522	-0.512991	-0.398776	-0.706216	0.277973	-0.577618	-0.0120772	-0.746888	-0.718417	-0.719971	-0.34425	-0.455575	-0.429464	-0.519789	-0.679087	-0.216217	0.742699	-0.535449	-0.203681	-0.573432	0.365661	-0.956728	-0.189263	-0.142815	-0.239254	-0.9661	-0.29046	-0.250585	-0.888536	-0.269369	-0.302569	-0.143714	-0.403954	-0.613992	-0.41158	0.157615	-0.38655	0.168547	0.0164188	-0.553317	0.0396754	-0.110574	-0.452452	-0.128406	-0.676023	-0.663869	-0.361812	-0.17642	-0.597232	-0.342218
chr1_40850522_40900797	0.0311492	-0.36575	-0.773882	0.0585359	-0.0789288	0.205263	-0.0894889	-0.203995	-0.21637	-0.0807089	-0.374691	0.0707304	-0.139837	-0.123199	0.10151	0.20923	-0.0100655	-0.221477	-0.273456	0.063287	-1.13953	0.0415896	0.0162754	-0.0234736	-0.114539	-0.27457	-0.332822	0.00150632	-0.341912	-0.126944	-0.0687557	-0.034936	-0.0582717	0.0262397	0.318573	0.0426143	-0.169804	-0.279196	-0.332239	-0.216323	-0.330334	-0.0541734	-0.0964213	0.116784	0.108393	-0.033653	0.0656291	-0.176146	0.157086
chr1_40900797_40951238	-0.0952192	-0.304112	0.526224	0.460459	-0.276274	0.4421	-0.191977	0.0134475	-0.251375	0.734938	0.267001	-0.106353	-0.18431	-0.146255	-0.192004	0.876129	0.414724	0.0313918	-0.178486	0.385404	-1.25615	0.245756	-0.50487	0.383587	-0.481322	0.125937	0.10851	0.326856	-0.145535	-0.188003	0.152194	-0.139826	-0.416282	-0.265975	0.461134	0.074236	0.264744	0.545646	-0.224431	-0.224719	-0.224041	-0.207391	-0.120363	0.0360622	-0.382407	0.121536	-0.589666	-0.408443	-0.490576
chr1_40951238_41002148	-0.378883	0.146885	-0.402143	0.0671548	-0.112339	-0.423367	-0.286775	-0.475411	-0.442966	0.0521851	0.405206	-0.302345	-0.388779	-0.317716	-0.167384	0.230377	-0.0263193	-0.128308	-0.314621	0.176904	-0.395237	-0.298748	-0.815841	0.324447	-0.551957	0.0344431	-0.643153	0.183531	-0.231838	-0.136794	-0.713904	-0.267589	-0.520018	-0.252306	0.456668	-0.391404	0.211667	0.207906	-0.410768	-0.239203	-0.362118	-0.442528	0.0811851	0.0262075	-0.340196	-0.150286	-0.470966	-0.234517	-0.377845
chr1_41002148_41053440	-0.41701	-0.644751	-0.365274	0.0561323	-0.452297	-0.707061	-0.0181659	-0.146051	-0.384963	-0.260014	0.13755	-0.520337	-0.077826	-0.266896	-0.299729	0.511795	-0.152153	-0.0307912	-0.579115	-0.303023	-1.25496	-0.454725	-0.247804	-0.0610847	-0.741749	-0.558555	-0.520194	-0.000546817	-0.289995	-0.349422	0.105968	-0.347885	0.162981	-0.343732	-0.0416299	-0.557454	-0.000436018	0.531557	-0.550346	-0.46913	-0.180112	-0.445715	-0.322787	-1.39189	-0.538451	-0.440227	-0.146456	-0.364437	-0.277861
chr1_41053440_41103799	-0.00595583	-0.157388	0.443412	-0.137018	0.302112	-0.0807292	-0.262375	0.121208	0.187841	-0.331028	0.145589	0.04178	0.0394969	-0.140331	-0.0291496	-0.172957	-0.225427	-0.13118	-0.211582	-0.00895793	-0.204494	-0.25769	-0.264841	-0.0349417	-0.019986	0.111174	-0.0274803	-0.098313	-0.201277	-0.034186	-0.100497	-0.0980504	0.136664	0.179379	0.347204	-0.224484	0.0923591	-0.431356	-0.0267955	-0.0684961	0.182547	-0.0676323	-0.144098	0.370898	0.127842	-0.216353	0.211007	-0.212835	-0.169377
chr1_41103799_41154134	0.135662	0.0681645	-0.0667577	0.164327	0.312566	-0.552961	-0.069615	0.104259	0.016125	-0.276005	-0.46341	0.0893072	0.183624	0.0626483	0.209255	-0.247321	-0.00801058	-0.0281662	-0.0143406	-0.032132	0.0491598	0.343956	-0.241133	0.452458	-0.00974534	0.18069	-0.16337	0.0280449	0.371143	0.149716	0.20223	-0.0183353	0.15212	-0.015222	0.553797	0.0625149	-0.0661628	-0.114351	0.0832992	-0.00749643	0.439699	0.169356	-0.00935182	0.0200076	0.187875	-0.214277	-0.0607254	0.0101159	-0.0552444
chr1_41154134_41204537	0.000829205	-0.19707	0.379018	-0.0810795	0.0183052	0.628784	-0.140232	-0.551527	-0.161747	0.451985	0.533108	0.0378973	0.230905	0.0480698	-0.123721	0.890629	0.420803	0.227659	-0.119199	0.670094	0.18018	0.173613	0.41299	0.194092	-0.298533	0.162771	0.422726	0.568956	-0.148392	-0.234699	0.270671	0.0132893	0.281579	-0.0181434	0.456196	-0.0863882	0.736339	0.139187	-0.0304463	-0.0359698	-0.155692	-0.0231048	-0.189742	-0.140007	0.183691	0.180538	0.125927	-0.615802	-0.0606655
chr1_41204537_41254678	0.0358138	0.0824457	-0.354404	0.252917	0.186669	0.285877	-0.0347378	0.709901	0.101271	0.432209	-0.125877	0.0488461	-0.00438057	0.260243	0.00206198	0.960949	0.0306377	0.451752	0.30284	0.788648	-0.101336	0.123409	0.118384	0.211072	0.163424	0.247921	-0.128658	0.0899374	0.279816	0.353497	0.102292	0.0266308	0.0026235	-0.104051	0.422333	-0.0802749	0.848443	0.894252	-0.0325646	0.508743	-0.024646	0.133498	-0.175163	0.651273	-0.159633	0.0438053	0.123288	0.368235	-0.161276
chr1_41254678_41304836	-0.0221535	-0.0220963	-0.414114	-0.764802	0.0913223	0.142322	-0.0659567	-0.748983	-0.153339	0.36909	-0.530699	0.064878	-0.0332148	-0.261399	-0.354922	-0.032276	0.147972	-0.546137	0.0978794	0.580304	-0.181072	-0.470937	-0.54963	0.0174001	-0.01612	-0.0438573	-0.521709	-0.54683	0.198892	0.32108	-0.241055	0.0154018	-0.132346	-0.0233559	0.439843	0.138405	-0.251451	0.0533197	-0.269919	-0.840266	-0.43805	0.105702	0.22849	-0.419135	-0.147384	-0.015714	-0.287123	0.00620077	-0.41826
chr1_41304836_41355053	0.173057	0.279833	-0.277993	0.296503	-0.101974	1.04306	0.123011	1.09684	0.152349	0.815743	-0.528971	0.0226239	-0.0961037	0.291408	0.137371	1.18558	0.116952	-0.0139507	0.12158	1.14483	0.139974	0.24319	0.246365	0.19794	-0.0898843	0.352775	-0.595648	-0.291129	0.319903	0.154293	0.40313	0.145557	0.196918	-0.042386	0.463526	-0.145405	0.594634	1.49536	0.0109139	0.185498	0.0265271	0.153308	0.169332	-0.100136	0.0688657	0.398148	0.260446	0.313246	0.272684
chr1_41355053_41405222	0.185662	0.316961	-0.507539	-0.445662	0.251918	-0.433895	0.0731573	-0.095347	-0.0579654	0.217213	-0.589602	0.30027	-0.0598317	0.167163	-0.0305774	-0.130558	-0.162357	-0.450253	0.134992	0.303067	0.124827	0.0457616	-0.0394099	0.228329	-0.275145	0.136448	-0.248166	-0.97016	0.336524	-0.0161814	-0.0239752	0.105003	0.132616	0.099564	0.387627	0.270999	-0.313207	0.0774851	-0.0775767	-0.469183	0.0892099	0.162027	0.231704	0.284977	0.0748158	-0.247241	-0.0301176	0.0434586	0.197186
chr1_41405222_41455821	0.0780702	-0.206027	0.15138	0.170131	-0.117975	0.267063	-0.3317	0.344207	-0.187565	0.262957	-0.700057	-0.0641875	-0.268321	-0.012726	0.00967331	0.589393	-0.319226	-0.317441	-0.157754	0.371332	-0.143578	-0.340276	-0.0671796	-0.254294	-0.484219	-0.181623	-0.130276	-0.132994	-0.262584	-0.284293	-0.0920373	-0.200552	-0.383739	-0.00259142	0.384509	-0.219819	0.382343	0.683192	0.00151517	-0.320585	-0.127676	-0.100215	-0.139314	-0.466756	-0.0197614	0.224456	-0.468877	-0.143082	-0.161719
chr1_41455821_41505911	0.0997856	0.0682402	-0.114363	0.552774	-0.0102535	-0.282257	-0.0960761	-0.215417	0.136068	-0.107161	-0.20754	0.0956569	-0.0803453	-0.10091	-0.0720422	-0.852799	-0.144238	0.0957881	0.0226446	0.103264	0.102367	0.0696115	-0.421115	0.367445	0.120795	-0.298262	0.0274574	0.348274	0.336301	0.336913	-0.392102	0.0266544	0.0129478	0.026381	0.244636	-0.0306567	-0.086534	-0.263303	-0.167266	-0.0834656	0.0295043	0.0769378	-0.15948	-0.380134	0.152593	-0.462818	0.00882742	-0.0936776	-0.0303011
chr1_41505911_41557721	-0.25132	-0.325815	0.502845	0.0532456	0.0456339	0.306203	-0.193582	-0.312607	-0.364724	-0.539603	-0.846158	-0.208575	-0.156455	-0.358844	-0.114621	0.305681	-0.0235277	-0.942044	-0.399814	-0.206329	-0.727656	-0.400009	-0.343827	-0.160804	-0.727969	-0.490744	-0.65878	-0.269177	-0.313389	-0.304996	-0.211805	-0.455881	-0.15327	-0.349715	0.166432	-0.322278	0.0541599	-0.0622631	-0.578904	-0.330963	-0.429185	-0.288894	0.042011	-0.139382	0.0624176	-0.184072	-0.425562	-0.394868	0.0045897
chr1_41557721_41608677	0.070955	-0.31603	-0.249133	0.377405	0.322764	0.382245	0.0104596	-0.224357	-0.0808962	0.159319	-0.648346	0.139502	0.141399	-0.243331	0.0202065	0.206116	0.599111	-0.249626	0.203167	0.249787	-0.258729	-0.542288	-0.778718	0.0314897	-0.172072	-0.0265552	-0.288644	-0.354844	-0.0161569	-0.20783	-0.439892	0.0547246	0.103362	0.201144	0.268928	0.0946514	0.0784047	0.441823	-0.372982	-0.0359915	-0.420964	-0.129714	-0.0366157	0.12019	-0.0699697	-0.168583	-0.107771	-0.252844	-0.509575
chr1_41608677_41660639	-0.19612	-0.23944	0.594856	0.435016	-0.0148099	-0.163598	-0.149141	0.0101099	-0.0720559	0.0593015	0.244436	-0.0855921	-0.193111	-0.326025	0.266351	0.229314	-0.242881	0.693757	-0.0868927	-0.190297	-1.04108	0.180992	-0.103809	0.141435	-0.0798139	-0.00663405	-0.279312	0.529698	0.0492233	-0.0993509	-0.308319	-0.0232786	-0.210449	-0.314503	0.318833	-0.21113	0.634449	-0.253769	-0.449109	0.251545	0.0967881	0.0237826	-0.335616	-0.0828381	-0.09517	-0.464822	0.14398	0.0872888	0.0444084
chr1_41660639_41712042	-0.189316	-0.0135756	0.244042	0.420747	-0.0548118	0.88972	-0.515523	0.163809	-0.334314	0.498075	0.148289	0.0576851	-0.0465517	-0.0322932	0.08065	0.65701	-0.69969	0.176614	-0.100654	0.288109	-0.15933	-0.136447	0.031011	0.381145	-0.451939	-0.576288	-0.107242	0.14755	-0.24515	0.205436	-0.0160298	0.0431332	-0.00635798	-0.261432	0.330281	-0.291146	0.241242	0.971231	-0.611677	0.128796	-0.276575	-0.218815	0.223906	0.314013	0.0612143	0.0934839	-0.250268	-0.067424	-0.313787
chr1_41712042_41762361	0.088753	-0.173678	-0.506376	-0.601895	0.00161604	-0.16849	-0.0164394	0.306344	-0.0388799	-0.25099	-0.569613	0.127058	-0.22091	-0.207469	-0.0865468	-0.940424	0.160274	-0.3699	-0.0173125	-0.108474	-0.435755	-0.333551	-0.405095	0.157491	0.2438	-0.092205	-0.396686	-0.182612	0.22982	0.0776258	-0.0877065	0.206816	0.277774	-0.0325139	0.411414	0.270495	-0.142302	-0.538953	-0.228276	-0.124569	-0.0915867	0.0886819	-0.0979484	-0.0487244	0.157107	0.260223	0.14961	-0.301987	-0.225697
chr1_41762361_41812556	0.0954638	0.085613	0.294345	0.00412378	0.255146	-0.0498171	0.0470638	0.205006	0.106295	-0.167388	0.141997	0.117087	0.356114	0.0653309	0.227311	0.126323	-0.166183	0.131451	-0.0438505	0.211521	-0.107968	0.256399	-0.032855	0.407218	0.264885	-0.0194541	0.018251	-0.149739	0.374772	0.0442636	0.00753749	0.183948	0.00714662	0.274263	0.382216	0.204951	-0.595567	0.331465	0.0299428	-0.198028	0.223638	0.13999	0.0921679	0.455891	-0.0989866	0.115735	-0.320432	0.202136	0.292915
chr1_41812556_41862648	-0.00741351	0.055637	0.268472	-0.0443066	0.247929	0.777281	-0.035597	1.28556	-0.162298	0.742729	-0.283941	-0.253318	-0.0965003	0.20285	-0.237297	0.398518	0.0107365	-0.420921	-0.0883886	0.98969	0.0260362	-0.369615	-0.199183	0.203337	0.159748	0.0728845	-0.354625	-0.307606	0.193061	0.261008	0.516544	0.302604	0.11151	-0.0249575	0.456944	0.040809	0.186107	0.85663	-0.00724337	0.0542339	-0.261882	0.381746	0.197346	0.49774	0.307652	0.311988	-0.194796	0.130326	-0.215934
chr1_41862648_41912739	0.370503	0.423108	0.388238	-0.171312	0.452374	0.0946819	0.105889	0.376577	0.32058	0.0680406	0.256059	0.520495	0.588186	-0.0846324	0.169489	-0.531868	0.0595498	0.301712	0.221996	0.386633	0.0990592	0.445351	-0.682609	0.358259	0.41494	0.113262	0.38696	0.222894	0.292384	0.606533	-0.059864	0.284638	0.224382	0.289405	0.517181	0.316492	-0.338647	-0.0968194	0.0337095	-0.0714511	0.427277	0.399863	0.28076	-0.12928	0.34644	-0.210661	0.112889	-0.145929	0.185556
chr1_41912739_41962754	0.228666	0.0589348	-0.0732425	-0.402422	0.00322195	-0.209155	-0.0236611	0.063516	0.0957535	0.133658	-0.0520511	0.0809879	0.213547	0.0697814	-0.538308	-0.485042	0.102969	0.214709	0.00456491	0.480744	0.192659	-0.124353	-0.178347	0.307628	0.274582	0.264637	-0.146379	0.169035	0.189123	0.353446	0.5918	0.0419096	0.0157497	0.187118	0.437754	-0.00208241	-0.235396	-0.0987121	-0.0687034	-0.0703304	-0.0708962	0.104022	0.108915	0.3714	0.205173	-0.153625	-0.156372	-0.0547639	-0.147202
chr1_41962754_42012759	0.364558	0.403709	-0.291806	0.147739	0.392908	0.238965	0.403564	-0.0563986	0.542442	0.587546	0.349556	0.135201	0.391426	0.528909	0.131425	0.148728	0.193523	0.117107	0.701863	0.733436	0.759306	0.251225	0.354517	0.394043	0.539969	0.262244	-0.109491	0.500148	0.63702	0.633197	0.31098	0.251972	0.497452	0.387299	0.640281	0.4739	0.475431	0.39891	0.257617	0.349167	0.326166	0.256663	0.34291	0.466743	0.473589	0.244113	0.217874	0.264637	0.319532
chr1_42012759_42064055	0.158789	0.239508	-0.0407551	-0.136761	0.294096	0.532703	0.215469	0.0929931	0.111581	-0.0208076	0.225731	0.517852	0.0579951	0.146433	0.324741	-0.665432	0.330443	0.118392	-0.00539624	0.151276	0.00744903	0.0621968	-0.550665	0.100249	0.420425	0.229137	0.137106	0.271155	0.414314	0.476574	-0.18224	0.29071	0.0997652	0.335929	0.469616	-0.109894	-0.470866	-0.456376	-0.370641	-0.206946	0.228108	0.231417	0.23441	-0.231086	0.0683529	0.110327	0.212604	-0.023222	0.091354
chr1_42064055_42114081	0.0955479	-0.0169926	0.464469	-0.414375	0.083204	-0.303881	0.0878689	-0.0892453	-0.115705	-0.455877	-0.190559	-0.0810521	-0.0860692	-0.221773	0.0722091	-0.910813	-0.147112	-0.363415	0.269079	0.0918651	-0.271094	0.00533014	-0.975317	0.403239	0.239003	0.234985	-0.0331112	-0.209068	-0.0671216	0.376044	-0.494329	-0.0158788	0.123507	0.12309	0.35503	-0.148598	-0.174387	-0.592858	0.162389	-0.378638	0.0608828	0.161775	0.179553	-0.398209	0.013883	-0.203844	-0.107147	-0.328614	-0.152842
chr1_42114081_42164113	0.177123	0.0784137	-0.628971	-0.616369	0.134826	0.15518	0.0665548	0.059654	0.290355	0.114471	-0.74481	0.285673	0.0476674	0.0997749	0.0458795	-1.15828	0.139356	-0.939071	0.321193	-0.0962303	0.143764	0.119401	-0.509254	0.606584	0.388674	-0.0520875	-0.0990913	-0.801679	0.336002	0.188528	-0.178652	0.22199	0.196016	0.266262	0.525527	0.415364	-0.417119	-0.331231	0.254484	-0.0956832	0.35087	0.27572	0.28653	-0.270117	0.137415	-0.218067	-0.202408	0.00251484	0.0716874
chr1_42164113_42214200	0.345342	0.462318	0.139939	-0.5258	0.607514	-0.425892	0.288257	0.312461	0.424756	-0.251288	-0.278322	0.684458	0.149609	0.194259	-0.129764	-0.958812	0.0370368	-0.555349	0.257573	0.394833	0.589707	0.250044	-0.887237	0.542862	0.52468	0.267767	0.204962	-0.416234	0.742177	0.727288	-0.130353	0.441146	0.32436	0.45523	0.581127	0.367385	-0.727263	0.0267665	0.402943	-0.635063	0.216542	0.55387	0.451329	0.306361	0.28563	-0.120475	-0.171206	0.512399	0.0609799
[truncated: 53,709 more rows]
[truncated: 15 more columns]

## Sheet: 100kb
	S15_FAO	S13_FAO	S16_G	S8_GAO	S16_GAO	S3_GAO	S11_F	S5_GAO	S14_GAO	S5_G	S10_GAO	S7_GAO	S7_FAO	S3_G	S2_FAO	S4_GAO	S4_FAO	S9_GAO	S8_FAO	S1_G	S14_FAO	S6_G	S12_FAO	S1_FAO	S6_FAO	S2_G	S11_G	S6_GAO	S5_FAO	S6_F	S13_G	S2_F	S16_F	S15_GAO	S1_F	S4_F	S1_GAO	S2_GAO	S12_F	S11_GAO	S9_FAO	S5_F	S16_FAO	S10_G	S9_F	S7_F	S14_F	S12_G	S10_F
[truncated: 27,301 more rows]
[truncated: 16 more columns]

[truncated: 2 more sheets: 250kb, 500kb]
