# Supplementary material for: Innovative paraffin embedding to unlock archival blocks for highly demanding genomic analyses
Source: Research Square preprint supplement (doi:10.21203/rs.3.rs-8787286/v1), 2026-02-13
Supplement: Supplementary file 12 [file fd084626f58915d5e8ea0f08.xlsx]

## Sheet: Foglio1
ID	Fixative	Processing	Fixation_Type	DIN	Organ
AO46	GAF	STD	GAO	6.6	Kidney
AO47	GAF	AO	G	4	Kidney
AO48	GAF	STD	GAO	6.7	Kidney
AO49	GAF	AO	G	5.7	Kidney
AO50	GAF	STD	GAO	6.6	Kidney
AO51	GAF	AO	G	5.4	Kidney
AO52	NBF	STD	F	4.3	Kidney
AO53	NBF	AO	FAO	5.1	Kidney
AO54	NBF	STD	F	4.4	Kidney
AO55	NBF	AO	FAO	4.3	Kidney
AO56	NBF	STD	F	4.8	Kidney
AO57	NBF	AO	FAO	4.3	Kidney
AO58	GAF	STD	G	4.3	Spleen
AO59	GAF	AO	GAO	6	Spleen
AO60	GAF	STD	G	5.6	Spleen
AO61	GAF	AO	GAO	6.5	Spleen
AO62	GAF	STD	GAO	7.3	Spleen
AO63	GAF	AO	G	6.2	Spleen
AO64	NBF	STD	F	2.6	Spleen
AO65	NBF	AO	FAO	4.3	Spleen
AO66	NBF	STD	F	4.7	Spleen
AO67	NBF	AO	FAO	4.4	Spleen
AO68	NBF	STD	F	2.9	Spleen
AO69	NBF	AO	FAO	3.6	Spleen
AO76	NBF	STD	F	3.1	Liver
AO77	NBF	AO	FAO	4	Liver
AO78	NBF	STD	F	3.5	Liver
AO79	NBF	AO	FAO	4.5	Liver
AO80	NBF	STD	F	2.8	Liver
AO81	NBF	AO	FAO	4.8	Liver
AO70	GAF	STD	G	5.2	Kidney
AO71	GAF	AO	GAO	5.6	Kidney
AO72	GAF	STD	G	5.2	Kidney
AO73	GAF	AO	GAO	6.1	Kidney
AO74	GAF	STD	GAO	4.5	Kidney
AO75	GAF	AO	G	3.3	Kidney
AO70	GAF	STD	GAO	5.7	Kidney
AO71	GAF	AO	G	5.1	Kidney
AO72	GAF	STD	GAO	5.7	Kidney
AO73	GAF	AO	G	5.6	Kidney
AO74	GAF	STD	GAO	4.5	Kidney
AO75	GAF	AO	G	3.3	Kidney
AO82	GAF	STD	GAO	6.4	Spleen
AO83	GAF	AO	G	5.4	Spleen
AO84	GAF	STD	G	5.4	Spleen
AO85	GAF	AO	GAO	6.3	Spleen
AO86	GAF	STD	G	3.8	Spleen
AO87	GAF	AO	GAO	7	Spleen
AO99	NBF	STD	F	6.7	Kidney
AO100	GAF	STD	G	5.6	Kidney
AO101	NBF	AO	FAO	7.2	Kidney
AO102	GAF	AO	GAO	7.9	Kidney
AO103	GAF	STD	G	6.4	Kidney
AO104	GAF	STD	G	6.4	Kidney
AO105	GAF	AO	GAO	8.2	Kidney
AO106	GAF	AO	GAO	7.4	Kidney
AO107	GAF	STD	G	6.1	Kidney
AO108	NBF	STD	F	4	Kidney
AO109	GAF	AO	GAO	8.6	Kidney
AO110	NBF	AO	FAO	6	Kidney
AO111	NBF	STD	F	6	Spleen
AO112	GAF	STD	G	5.9	Spleen
AO113	NBF	AO	FAO	6.3	Spleen
AO114	GAF	AO	GAO	6.4	Spleen
AO115	GAF	STD	G	6.8	Spleen
AO116	GAF	AO	GAO	8.3	Spleen
AO117	NBF	STD	F	4.7	Spleen
AO118	NBF	AO	FAO	6.5	Spleen
AO135	NBF	STD	F	3	Tumor
AO136	GAF	STD	GAO	5.9	Tumor
AO139	GAF	AO	GAO	5.8	Tumor
AO140	GAF	AO	G	3.6	Tumor
