# Supplementary figures and images for: Innovative paraffin embedding to unlock archival blocks for highly demanding genomic analyses
Source: Research Square preprint supplement (doi:10.21203/rs.3.rs-8787286/v1), 2026-02-13

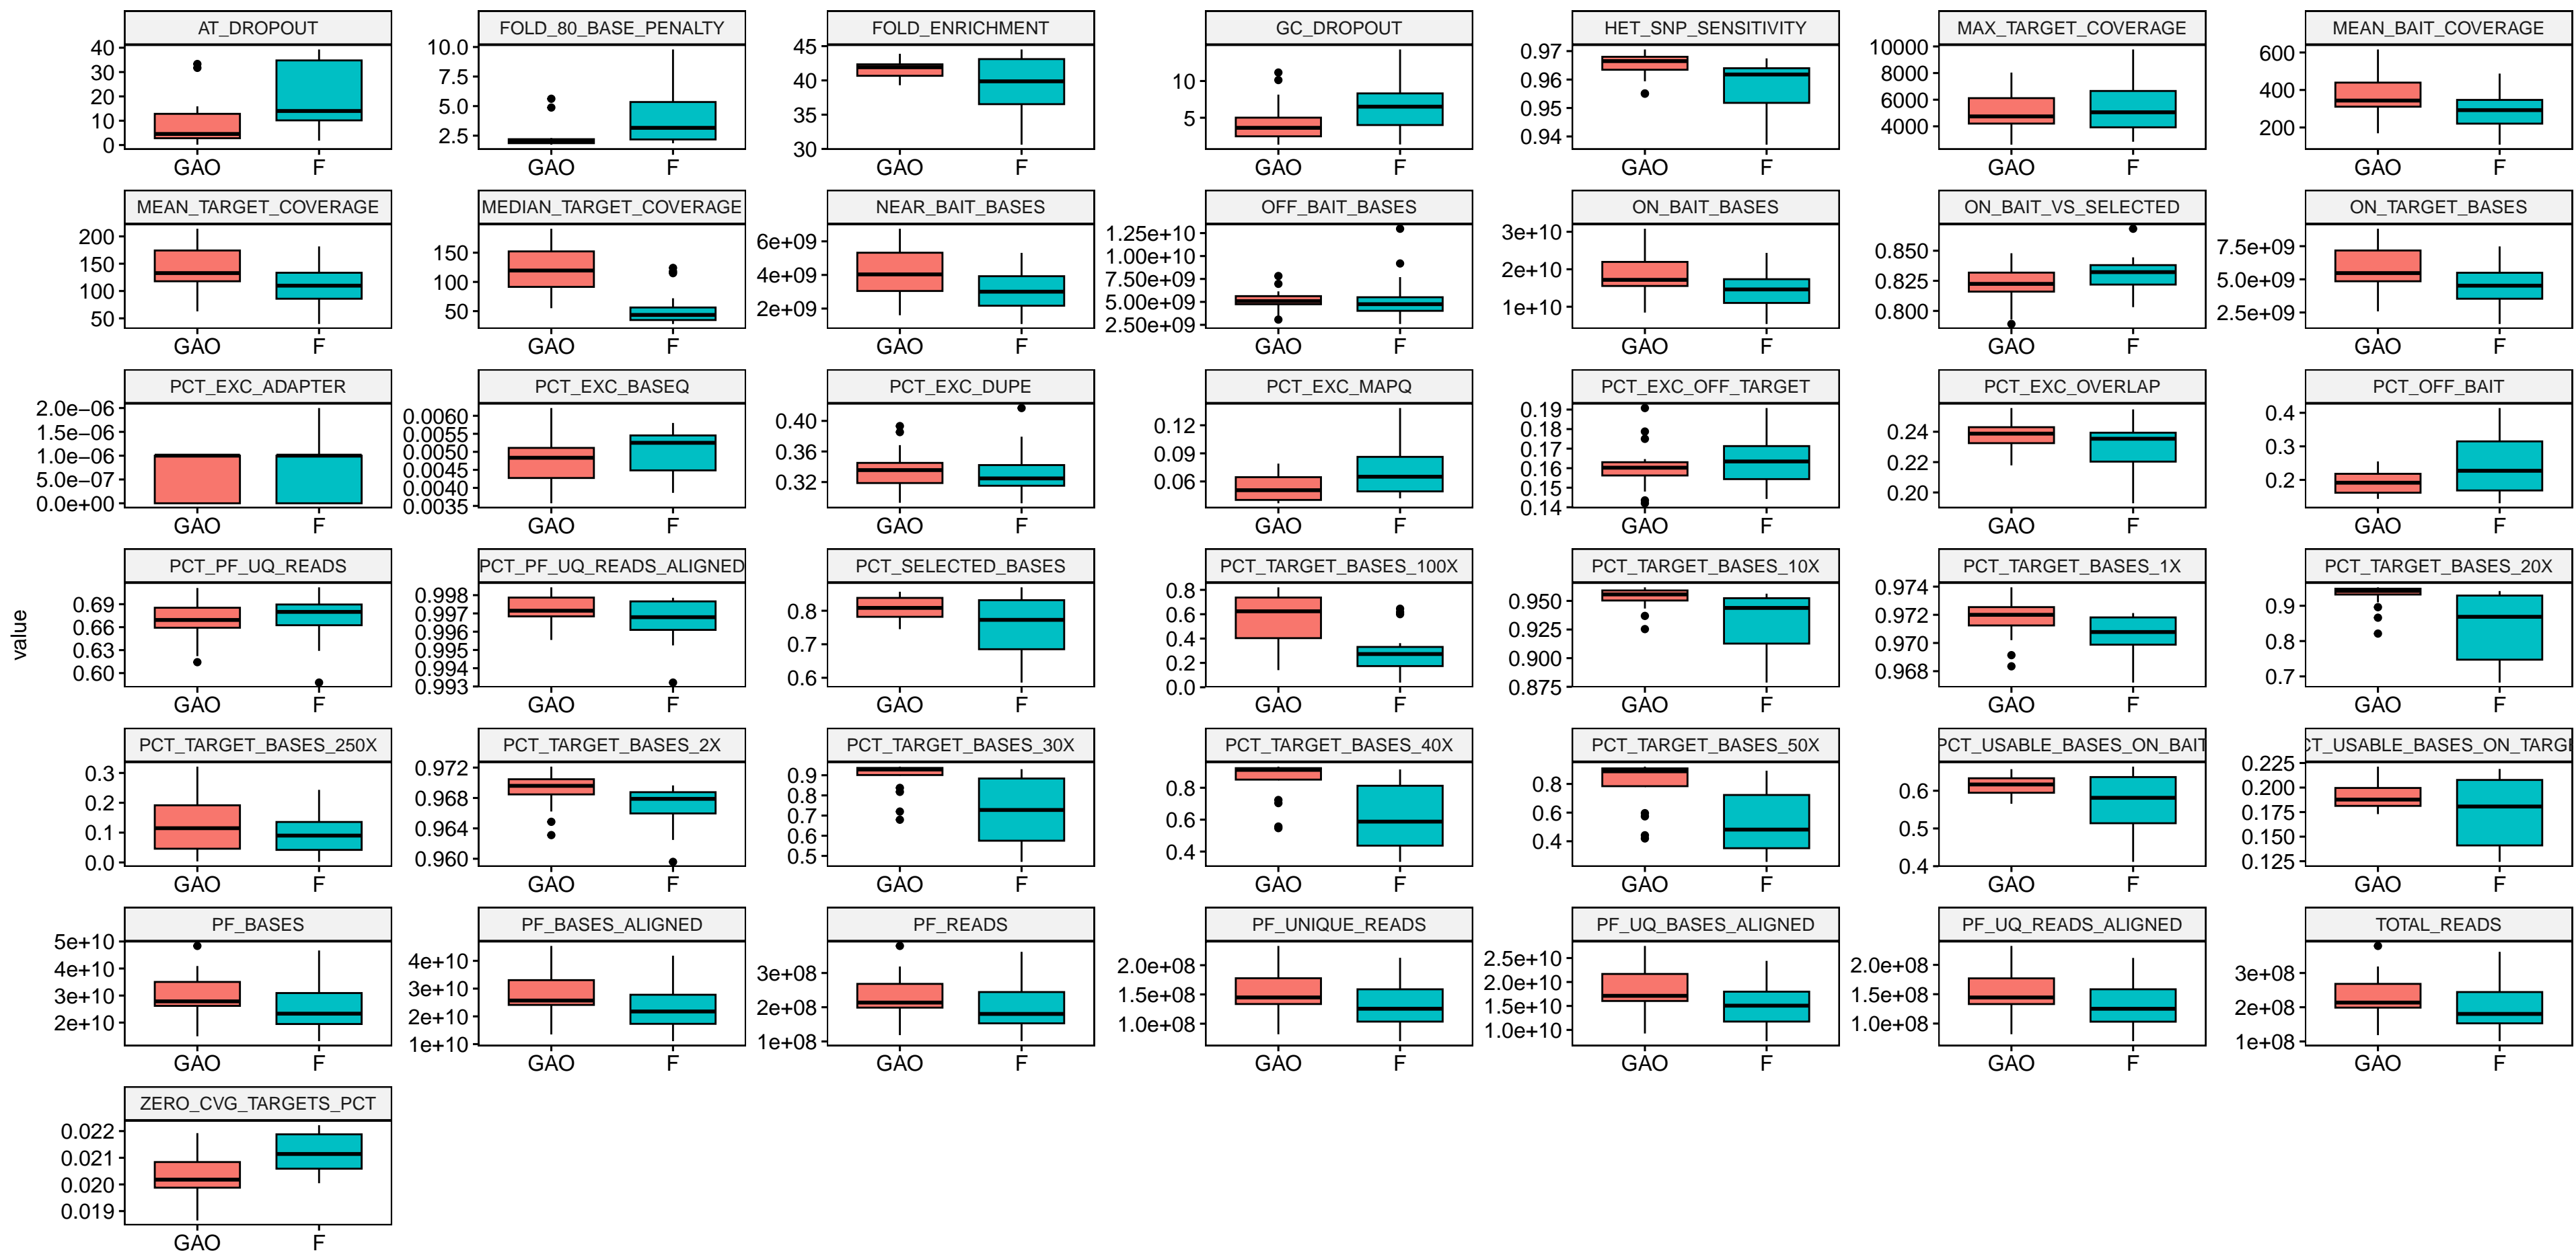

Supplement: Supplementary file 1 [file 2d2a98e0aa8bf55a99bc3d58.pdf]
